# Supplementary material for: Abnormally expressed JunB transactivated by IL-6/STAT3 signaling promotes uveal melanoma aggressiveness via epithelial–mesenchymal transition
Source: PubMed Central journal article supplement (PMC6028753; doi:10.1042/bsr20180532), 2018-07-03
Supplement: bsr20180532_Supp1.pdf [file bsr20180532_Supp1.pdf]

**Table S1 The sequences of qPCR primer pairs**

| <b>Gene</b> | <b>Forward primer(5'-&gt;3')</b> | <b>Reverse primer(5'-&gt;3')</b> |
|-------------|----------------------------------|----------------------------------|
| FN1         | AGTGCATCTGCACAGGCAACGG           | TCAGCCACTGCATCCCCACAGA           |
| ICAM-1      | CACGCCTCCCTGAACCTATC             | CAGGTACCATGGCCCCAAAT             |
| TJP1        | GCACAGTTTGGCACAGCCTCCT           | AGCACGCCCCCATTGCTGTT             |
| TJP2        | ATGAGAGGGTTTTGCTGCGA             | TCCACAGCTTTCGGAGTCAC             |
| CDH1        | AAGCCCCCATCTTTGTGCCTCCT          | TCCAGCCAGTTGGCAGTGTCTCT          |
| Vimentin    | CCAAGAACCTGCAGGAGGCAGAAG         | GCATCTGGCGTTCCAGGGACTCAT         |
| JunB        | CCATCAGCTACCTCCCACAC             | GTCTGCGGTTCCCTCCTTGAA            |
| c-Jun       | GTGCCGAAAAAGGAAGCTGG             | CTGCGTTAGCATGAGTTGGC             |
| c-Fos       | CCGAGCTGGTGCATTACAGA             | CGCACAGATAAGGTCCTCCC             |
| Zeb1        | GCACACCAGAAGCCAGTGGTCA           | GCAAAGGTGTAAGTGCACAGGGAGC        |
| Snail       | TACAAGGCCATGTCCGGACCCA           | TGTGGAGCAGGGACATTCGGGA           |
| Slug        | TGCGGCAAGGCGTTTTCCAGA            | CAGTGTGCTACACAGCAGCCAGA          |
| Twist1      | GCCGGAGACCTAGATGTCATT            | TTTTAAAAGTGCGCCCCACG             |
| MMP2        | GCCCTGATGGCACCCATTTA             | GATCTCAGGAGTGACAGGGC             |
| MMP14       | ATCTGCCTCTGCCTCACCTA             | AAGCCCCATCCAAGGCTAAC             |
| MMP19       | GGGTGGGGGTAGTTTAAGCC             | CAGCTTGCCTCACAGTGGTA             |
| GAPDH       | ATGGGGAAGGTGAAGGTCGGAGT          | TGACAAGCTTCCCGTTCTCAGCC          |

**Table S2 Differentially expression genes (DEGs) in IL6/C918 cells versus C918 cells**

| gene_id      | Symbol       | Entrez_id | C918 #1   | C918 #2  | IL6/C918 #1 | IL6/C918 #2 | log2FC  | PValue    | FDR       | Regulation   |
|--------------|--------------|-----------|-----------|----------|-------------|-------------|---------|-----------|-----------|--------------|
| NM_001085    | SERPINA3     | 12        | 2.02776   | 2.25183  | 117.639     | 120.644     | 5.56519 | 0         | 0         | Up-regulated |
| NM_001291825 | GRAP2        | 9402      | 0.0003177 | 0.000302 | 6.28083     | 7.62044     | 5.25577 | 7.23E-62  | 8.17E-60  | Up-regulated |
| NM_004833    | AIM2         | 9447      | 0.250836  | 0.207759 | 20.3985     | 20.1423     | 4.88951 | 2.98E-67  | 3.87E-65  | Up-regulated |
| NM_006169    | NNMT         | 4837      | 0.60468   | 0.269653 | 22.9707     | 22.9399     | 4.73002 | 2.93E-74  | 4.48E-72  | Up-regulated |
| NM_003955    | SOCS3        | 9021      | 2.99      | 3.32664  | 60.0462     | 58.7474     | 4.14667 | 0         | 0         | Up-regulated |
| NM_005195    | CEBPD        | 1052      | 3.42622   | 4.74858  | 82.2204     | 81.4334     | 4.13664 | 3.02E-167 | 1.41E-164 | Up-regulated |
| NM_014220    | TM4SF1       | 4071      | 1.32586   | 1.16877  | 22.3916     | 25.0897     | 3.83361 | 3.07E-73  | 4.51E-71  | Up-regulated |
| NM_152236    | GAS2L1       | 10634     | 0.0035866 | 0.00136  | 3.99616     | 3.87222     | 3.7975  | 1.23E-27  | 5.46E-26  | Up-regulated |
| NM_001184943 | FAM219A      | 203259    | 0         | 0.061449 | 3.29529     | 3.09177     | 3.70087 | 1.43E-27  | 6.33E-26  | Up-regulated |
| NM_001301128 | MAGI2        | 9863      | 0.0004482 | 0.002866 | 1.26428     | 1.2644      | 3.66405 | 1.78E-25  | 7.10E-24  | Up-regulated |
| NM_001301084 | ARHGEF12     | 23365     | 0.0002805 | 0.000768 | 0.905141    | 1.7501      | 3.66094 | 7.46E-25  | 2.88E-23  | Up-regulated |
| NM_001321856 | JAK1         | 3716      | 0.0017069 | 0.006817 | 4.16485     | 1.98557     | 3.65614 | 7.09E-25  | 2.75E-23  | Up-regulated |
| NM_001321713 | NCOA2        | 10499     | 0         | 0.000778 | 1.41032     | 0.950743    | 3.6151  | 1.77E-24  | 6.70E-23  | Up-regulated |
| NM_001195098 | ANKRD28      | 23243     | 0         | 0        | 1.39838     | 1.26038     | 3.59897 | 1.87E-24  | 7.04E-23  | Up-regulated |
| NM_006074    | TRIM22       | 10346     | 0.813342  | 0.850567 | 11.6648     | 11.4821     | 3.49954 | 1.47E-72  | 2.12E-70  | Up-regulated |
| NM_004525    | LRP2         | 4036      | 0.143807  | 0.135027 | 2.18236     | 1.864       | 3.49568 | 7.68E-61  | 8.53E-59  | Up-regulated |
| NM_001127223 | CD59         | 966       | 0.302575  | 0.098339 | 5.08184     | 4.25502     | 3.48524 | 1.19E-30  | 5.80E-29  | Up-regulated |
| NM_003378    | VEGF         | 7425      | 300.201   | 301.621  | 3498.03     | 3247.66     | 3.47732 | 0         | 0         | Up-regulated |
| NM_004976    | KCNC1        | 3746      | 0.0902956 | 0.045823 | 2.05213     | 1.84896     | 3.46781 | 2.50E-28  | 1.14E-26  | Up-regulated |
| NM_014826    | CDC42BPA     | 8476      | 0.0005885 | 0.0005   | 0.703473    | 1.12304     | 3.45727 | 3.54E-22  | 1.16E-20  | Up-regulated |
| NM_080657    | RSAD2        | 91543     | 0.819206  | 0.724127 | 10.1714     | 9.64218     | 3.38774 | 1.17E-67  | 1.56E-65  | Up-regulated |
| NM_001130845 | BCL6         | 604       | 1.07057   | 1.18674  | 16.564      | 11.9337     | 3.31154 | 5.79E-55  | 5.82E-53  | Up-regulated |
| NM_001260489 | LSR          | 51599     | 0.0036489 | 0.000524 | 3.83682     | 3.30453     | 3.27246 | 6.70E-20  | 1.97E-18  | Up-regulated |
| NM_001172436 | PHKA1        | 5255      | 6.83E-05  | 0.000129 | 1.07323     | 1.63403     | 3.22797 | 2.99E-19  | 8.45E-18  | Up-regulated |
| NM_001098213 | HRH1         | 3269      | 0         | 0        | 1.60283     | 1.44875     | 3.1938  | 6.29E-19  | 1.72E-17  | Up-regulated |
| NM_001322254 | JMJD1C       | 221037    | 0.189546  | 0.181071 | 3.77787     | 2.15179     | 3.13746 | 1.52E-26  | 6.47E-25  | Up-regulated |
| NM_002928    | RGS16        | 6004      | 10.4975   | 12.3734  | 96.7656     | 99.3381     | 3.0636  | 5.10E-279 | 3.75E-276 | Up-regulated |
| NM_001134473 | GSE1         | 23199     | 0.000863  | 0.00027  | 1.00149     | 0.802273    | 3.04028 | 4.15E-17  | 1.01E-15  | Up-regulated |
| NM_001292022 | TAP1         | 6890      | 0.0551109 | 0.000881 | 4.09402     | 13.0896     | 3.0244  | 8.90E-17  | 2.12E-15  | Up-regulated |
| NM_004120    | GBP2         | 2634      | 1.63968   | 1.44719  | 13.4097     | 13.0795     | 2.98027 | 1.87E-94  | 3.73E-92  | Up-regulated |
| NM_213646    | WARS         | 7453      | 3.41546   | 3.66193  | 29.6732     | 27.467      | 2.92348 | 3.59E-118 | 9.39E-116 | Up-regulated |
| NM_001323356 | PTPRE        | 5791      | 0.12269   | 0.059812 | 1.67037     | 1.99931     | 2.88464 | 8.18E-18  | 2.09E-16  | Up-regulated |
| NM_000170    | GLDC         | 2731      | 8.16609   | 7.09583  | 57.2201     | 57.2043     | 2.87798 | 2.11E-286 | 1.61E-283 | Up-regulated |
| NM_153215    | LSMEM2       | 132228    | 0.0771271 | 0.0773   | 4.57326     | 5.94808     | 2.87447 | 8.55E-16  | 1.92E-14  | Up-regulated |
| NM_001111309 | PDE4A        | 5141      | 0.0088132 | 0.001092 | 1.39072     | 3.78028     | 2.82764 | 8.67E-15  | 1.81E-13  | Up-regulated |
| NM_007021    | C10orf10     | 11067     | 1.5579    | 1.62621  | 12.8252     | 14.903      | 2.82335 | 5.17E-40  | 3.43E-38  | Up-regulated |
| NM_005178    | BCL3         | 602       | 3.88387   | 4.53991  | 31.4696     | 31.9127     | 2.79908 | 6.38E-85  | 1.12E-82  | Up-regulated |
| NM_001145057 | IL18BP       | 10068     | 0.118597  | 0        | 5.38097     | 5.37257     | 2.7858  | 1.35E-14  | 2.79E-13  | Up-regulated |
| NM_017745    | BCOR         | 54880     | 0.0099283 | 0.001111 | 0.80041     | 1.07611     | 2.74627 | 4.16E-14  | 8.28E-13  | Up-regulated |
| NM_001306129 | FN1          | 2335      | 4.0994    | 4.29025  | 26.378      | 30.7179     | 2.72306 | 2.02E-179 | 1.14E-176 | Up-regulated |
| NM_005978    | S100A2       | 6273      | 5.60536   | 4.57416  | 38.2524     | 40.122      | 2.71058 | 1.47E-42  | 1.06E-40  | Up-regulated |
| NM_003004    | SECTM1       | 6398      | 0.120393  | 0.124576 | 3.37587     | 2.94341     | 2.69389 | 1.54E-14  | 3.15E-13  | Up-regulated |
| NM_001347423 | M_00134742   | NA        | 92.411    | 94.4677  | 593.16      | 599.536     | 2.67522 | 0         | 0         | Up-regulated |
| NM_018689    | CEMIP        | 57214     | 48.9473   | 50.8838  | 320.655     | 309.952     | 2.65726 | 0         | 0         | Up-regulated |
| NM_002053    | GBP1         | 2633      | 1.21697   | 1.52872  | 9.87331     | 9.84956     | 2.628   | 1.79E-41  | 1.26E-39  | Up-regulated |
| NM_000963    | PTGS2        | 5743      | 2.06996   | 2.17338  | 13.3119     | 13.8773     | 2.59804 | 7.08E-94  | 1.39E-91  | Up-regulated |
| NM_003999    | OSMR         | 9180      | 2.76293   | 3.14836  | 17.3804     | 19.5131     | 2.57702 | 1.85E-107 | 4.30E-105 | Up-regulated |
| NM_005746    | NAMPT        | 10135     | 61.0779   | 58.5887  | 343.852     | 368.683     | 2.56799 | 0         | 0         | Up-regulated |
| NM_001322117 | PDP1         | 55066     | 0.0012197 | 0.002146 | 1.59839     | 0.525833    | 2.53895 | 3.57E-12  | 5.91E-11  | Up-regulated |
| NM_030641    | APOL6        | 80830     | 1.54187   | 1.4872   | 8.87647     | 9.00224     | 2.51929 | 1.10E-145 | 4.29E-143 | Up-regulated |
| NM_198571    | atative)(NAT | 375607    | 2.26755   | 2.57102  | 15.4535     | 14.2771     | 2.49633 | 6.09E-56  | 6.23E-54  | Up-regulated |
| NM_057166    | COL6A3       | 1293      | 0.414233  | 0.462242 | 2.65957     | 3.05224     | 2.47787 | 7.57E-34  | 4.16E-32  | Up-regulated |
| NM_016489    | NTSC3A       | 51251     | 0.721417  | 0.228257 | 6.53656     | 7.64477     | 2.4722  | 9.41E-13  | 1.64E-11  | Up-regulated |
| NM_024699    | ZFAND1       | 79752     | 0.0275113 | 0.046938 | 2.99772     | 2.17326     | 2.43313 | 2.39E-11  | 3.71E-10  | Up-regulated |
| NM_001712    | CEACAM1      | 634       | 4.20947   | 4.1213   | 23.0233     | 23.0429     | 2.41989 | 1.63E-118 | 4.33E-116 | Up-regulated |
| NM_057167    | COL6A3       | 1293      | 0.133672  | 0.164997 | 1.41002     | 1.07519     | 2.41911 | 1.14E-16  | 2.70E-15  | Up-regulated |
| NM_020223    | FAM20C       | 56975     | 5.15429   | 4.86396  | 28.0967     | 27.1531     | 2.41068 | 2.95E-104 | 6.56E-102 | Up-regulated |
| NM_002960    | S100A3       | 6274      | 39.9551   | 37.596   | 211.696     | 209.049     | 2.40708 | 7.21E-146 | 2.87E-143 | Up-regulated |
| NM_006931    | SLC2A3       | 6515      | 19.2745   | 18.8067  | 102.01      | 99.8102     | 2.40006 | 0         | 0         | Up-regulated |
| NM_000641    | IL11         | 3589      | 0.516869  | 0.855699 | 5.91853     | 5.51637     | 2.39119 | 5.05E-16  | 1.14E-14  | Up-regulated |
| NM_003661    | APOL1        | 8542      | 1.63166   | 1.38115  | 9.63299     | 8.7542      | 2.38705 | 3.51E-32  | 1.84E-30  | Up-regulated |
| NM_004184    | WARS         | 7453      | 25.6161   | 25.8822  | 130.842     | 138.309     | 2.377   | 0         | 0         | Up-regulated |
| NM_015444    | udogene)(TM  | 25907     | 24.0267   | 25.3653  | 128.989     | 129.657     | 2.37615 | 1.66E-292 | 1.38E-289 | Up-regulated |
| NM_002026    | FN1          | 2335      | 41.7256   | 43.0937  | 227.748     | 210.595     | 2.36347 | 0         | 0         | Up-regulated |
| NM_213645    | WARS         | 7453      | 15.5483   | 13.8519  | 73.6654     | 77.6991     | 2.33905 | 1.15E-174 | 6.30E-172 | Up-regulated |
| NM_002198    | IRF1         | 3659      | 2.18709   | 2.2509   | 12.401      | 11.5728     | 2.33211 | 5.07E-55  | 5.13E-53  | Up-regulated |
| NM_212482    | FN1          | 2335      | 11.1476   | 11.0575  | 53.5803     | 57.3801     | 2.31316 | 0         | 0         | Up-regulated |
| NM_001281988 | SPOCD1       | 90853     | 2.69691   | 3.12034  | 15.6537     | 15.5502     | 2.30246 | 8.13E-47  | 6.67E-45  | Up-regulated |
| NM_203418    | RCAN1        | 1827      | 5.30026   | 4.4921   | 24.4511     | 26.7821     | 2.30232 | 6.29E-63  | 7.61E-61  | Up-regulated |
| NM_000112    | SLC26A2      | 1836      | 16.2903   | 15.8488  | 77.4381     | 79.6605     | 2.28688 | 0         | 0         | Up-regulated |
| NM_001204285 | MUC1         | 4582      | 1.92953   | 1.92483  | 11.6019     | 10.92       | 2.28226 | 1.46E-24  | 5.55E-23  | Up-regulated |
| NM_001144886 | CITED1       | 4435      | 14.6647   | 12.1821  | 69.6002     | 69.0605     | 2.27281 | 1.38E-52  | 1.34E-50  | Up-regulated |
| NM_001256443 | PRRT2        | 112476    | 0.462007  | 0.749278 | 4.47334     | 4.14888     | 2.26969 | 4.51E-15  | 9.64E-14  | Up-regulated |
| NR_047671    | BANCR        | 1E+08     | 0.774097  | 0.51448  | 14.4288     | 11.1948     | 2.25865 | 3.56E-10  | 4.98E-09  | Up-regulated |
| NM_000014    | A2M          | 2         | 37.9604   | 35.8948  | 173.823     | 176.769     | 2.24544 | 0         | 0         | Up-regulated |
| NM_001276276 | MAZ          | 4150      | 0         | 0        | 2.51113     | 4.73906     | 2.2335  | 8.77E-10  | 1.17E-08  | Up-regulated |
| NM_138456    | BATF2        | 116071    | 2.5276    | 2.76308  | 14.4768     | 13.2696     | 2.23283 | 2.32E-33  | 1.26E-31  | Up-regulated |
| NM_000271    | NPC1         | 4864      | 37.5219   | 38.4417  | 176.326     | 178.296     | 2.22292 | 0         | 0         | Up-regulated |
| NM_002229    | JUNB         | 3726      | 51.3687   | 46.6961  | 233.12      | 227.415     | 2.22217 | 2.39E-298 | 2.28E-295 | Up-regulated |
| NM_001144887 | CITED1       | 4435      | 5.05666   | 2.12142  | 27.0181     | 30.1843     | 2.22044 | 2.33E-12  | 3.93E-11  | Up-regulated |
| NM_001324119 | CYFIP1       | 23191     | 0         | 0        | 2.57254     | 0.873198    | 2.2204  | 1.03E-09  | 1.36E-08  | Up-regulated |
| NM_022779    | DDX31        | 64794     | 0.0009182 | 0.004006 | 0.787488    | 1.82631     | 2.20845 | 1.29E-09  | 1.69E-08  | Up-regulated |

|              |            |        |           |          |          |          |         |           |           |              |
|--------------|------------|--------|-----------|----------|----------|----------|---------|-----------|-----------|--------------|
| NM_032206    | NLRC5      | 84166  | 1.85611   | 1.57932  | 8.47589  | 8.19426  | 2.2069  | 7.38E-63  | 8.82E-61  | Up-regulated |
| NM_213599    | ANO5       | 203859 | 0.48519   | 0.320715 | 4.73327  | 2.11573  | 2.20278 | 1.88E-11  | 2.94E-10  | Up-regulated |
| NM_001040058 | SPP1       | 6696   | 22.2276   | 20.8174  | 98.9278  | 101.521  | 2.19992 | 5.03E-174 | 2.67E-171 | Up-regulated |
| NM_001303236 | ISG20      | 3669   | 0.668544  | 0.293295 | 3.89162  | 3.8726   | 2.19446 | 8.13E-12  | 1.31E-10  | Up-regulated |
| NM_080388    | S100A16    | 140576 | 2.78287   | 2.43632  | 13.6749  | 19.0617  | 2.19016 | 1.08E-15  | 2.41E-14  | Up-regulated |
| NM_003380    | VIM        | 7431   | 1576.09   | 1535.02  | 6687.84  | 7410.27  | 2.18    | 5.74E-06  | 4.75E-05  | Up-regulated |
| NR_015421    | LOC154761  | 154761 | 2.86825   | 2.72909  | 13.516   | 13.8337  | 2.17776 | 2.67E-41  | 1.86E-39  | Up-regulated |
| NM_003641    | IFITM1     | 8519   | 60.3464   | 55.4484  | 289.825  | 246.018  | 2.16171 | 7.47E-80  | 1.24E-77  | Up-regulated |
| NM_001306131 | FN1        | 2335   | 4.07787   | 4.07683  | 17.5549  | 19.0632  | 2.1437  | 5.22E-150 | 2.26E-147 | Up-regulated |
| NM_004428    | EFNA1      | 1942   | 2.34751   | 2.4107   | 11.6933  | 14.0912  | 2.14258 | 1.94E-19  | 5.56E-18  | Up-regulated |
| NM_001142312 | TMEM169    | 92691  | 0.000152  | 0.000123 | 1.05808  | 2.41593  | 2.13896 | 3.93E-09  | 4.89E-08  | Up-regulated |
| NM_003733    | OASL       | 8638   | 2.63906   | 3.62578  | 14.7917  | 16.7075  | 2.13098 | 5.98E-25  | 2.32E-23  | Up-regulated |
| NM_001034850 | FAM134B    | 54463  | 2.64459   | 1.92318  | 10.7727  | 11.4078  | 2.12319 | 1.22E-29  | 5.82E-28  | Up-regulated |
| NM_020704    | STRIP2     | 57464  | 4.28303   | 4.08453  | 19.4315  | 17.9114  | 2.12175 | 2.04E-99  | 4.19E-97  | Up-regulated |
| NM_001077195 | ZNF436     | 80818  | 1.1436    | 1.04191  | 5.62529  | 5.03935  | 2.10335 | 1.73E-26  | 7.36E-25  | Up-regulated |
| NM_001080423 | GRIP2      | 80852  | 0.0323111 | 0.060142 | 0.681174 | 0.64209  | 2.09411 | 5.94E-09  | 7.25E-08  | Up-regulated |
| NM_001303496 | SAMD9L     | 219285 | 0.489297  | 0.171546 | 2.36943  | 2.90552  | 2.09341 | 3.08E-10  | 4.34E-09  | Up-regulated |
| NM_002982    | CCL2       | 6347   | 2.35038   | 2.16808  | 15.55    | 16.502   | 2.09071 | 3.60E-11  | 5.50E-10  | Up-regulated |
| NM_001323507 | OSMR       | 9180   | 0.373611  | 0.242033 | 3.4773   | 2.72     | 2.08722 | 1.79E-09  | 2.29E-08  | Up-regulated |
| NM_015719    | COL5A3     | 50509  | 9.93398   | 10.0833  | 42.7703  | 42.1111  | 2.07751 | 0         | 0         | Up-regulated |
| NM_001330552 | NLRC5      | 84166  | 1.17102   | 2.09376  | 8.35109  | 8.02204  | 2.06508 | 3.69E-19  | 1.03E-17  | Up-regulated |
| NM_001308366 | PGPEP1     | 54858  | 0.0001334 | 0.012802 | 1.02646  | 0.503236 | 2.05881 | 1.55E-08  | 1.79E-07  | Up-regulated |
| NM_000593    | TAP1       | 6890   | 32.0442   | 28.8459  | 132.818  | 122.547  | 2.05301 | 4.47E-172 | 2.25E-169 | Up-regulated |
| NM_003650    | CST7       | 8530   | 10.9282   | 10.6119  | 47.1519  | 47.5739  | 2.03799 | 4.48E-38  | 2.78E-36  | Up-regulated |
| NM_001161780 | PDP1       | 54704  | 2.74122   | 1.84049  | 9.6814   | 11.4051  | 2.01704 | 1.12E-22  | 3.78E-21  | Up-regulated |
| NM_005985    | SNAI1      | 6615   | 10.2832   | 9.63665  | 39.576   | 41.0086  | 2.0163  | 1.21E-08  | 1.12E-07  | Up-regulated |
| NM_005935    | AFF1       | 4299   | 0.0002197 | 0.000157 | 1.52856  | 0.366197 | 2.00661 | 2.67E-08  | 3.01E-07  | Up-regulated |
| NM_144489    | RGS3       | 5998   | 21.7984   | 23.5864  | 94.67    | 88.8671  | 1.99449 | 3.64E-125 | 1.04E-122 | Up-regulated |
| NM_153487    | MDGA1      | 266727 | 3.84491   | 3.64162  | 16.1124  | 14.3166  | 1.99402 | 1.18E-97  | 2.39E-95  | Up-regulated |
| NM_000598    | IGFBP3     | 3486   | 3.45919   | 3.93147  | 14.8719  | 16.5008  | 1.98523 | 1.73E-36  | 1.02E-34  | Up-regulated |
| NM_000064    | C3         | 718    | 0.508103  | 0.574188 | 2.60094  | 2.71688  | 1.98475 | 1.29E-15  | 2.86E-14  | Up-regulated |
| NM_201442    | C1S        | 716    | 1.39315   | 1.82652  | 7.70581  | 7.13603  | 1.98259 | 7.53E-19  | 2.04E-17  | Up-regulated |
| NM_001267047 | FRMD6      | 122786 | 0.824643  | 1.91142  | 6.41521  | 11.881   | 1.9734  | 1.39E-09  | 1.81E-08  | Up-regulated |
| NM_212474    | FN1        | 2335   | 2.30853   | 1.32907  | 8.30985  | 8.03266  | 1.9556  | 3.52E-19  | 9.85E-18  | Up-regulated |
| NM_001024465 | SOD2       | 6648   | 17.0666   | 14.6138  | 64.7062  | 63.199   | 1.95306 | 4.48E-51  | 4.24E-49  | Up-regulated |
| NM_030788    | DCSTAMP    | 81501  | 1.05968   | 0.971723 | 5.04818  | 5.93495  | 1.94412 | 2.16E-11  | 3.36E-10  | Up-regulated |
| NM_001272066 | SHISA5     | 51246  | 2.02956   | 1.40815  | 8.54682  | 7.86306  | 1.94202 | 1.57E-14  | 3.20E-13  | Up-regulated |
| NM_031950    | FGFBP2     | 83888  | 59.0344   | 54.4947  | 211.211  | 225.664  | 1.93055 | 1.91E-147 | 8.11E-145 | Up-regulated |
| NM_001099294 | KIAA1644   | 85352  | 0.158153  | 0.146232 | 0.900416 | 1.12953  | 1.91694 | 6.38E-09  | 7.77E-08  | Up-regulated |
| NM_033285    | TP53INP1   | 94241  | 0.76631   | 0.375453 | 2.89281  | 3.3058   | 1.91196 | 2.26E-10  | 3.23E-09  | Up-regulated |
| NM_002201    | ISG20      | 3669   | 8.83146   | 11.4881  | 39.377   | 41.3401  | 1.91027 | 7.34E-38  | 4.51E-36  | Up-regulated |
| NM_001321920 | FAM219B    | 57184  | 0.465435  | 0.251135 | 2.61611  | 2.65784  | 1.90842 | 2.58E-08  | 2.92E-07  | Up-regulated |
| NM_001080391 | SP100      | 6672   | 1.4434    | 1.90094  | 7.39466  | 6.36992  | 1.90207 | 2.34E-24  | 8.74E-23  | Up-regulated |
| NR_125994    | OC10272431 | 1E+08  | 1.67486   | 2.39879  | 12.6541  | 9.68627  | 1.88679 | 5.24E-10  | 7.17E-09  | Up-regulated |
| NM_001321691 | BZW1       | 9689   | 1.49276   | 2.51851  | 8.70118  | 9.34681  | 1.88038 | 6.19E-14  | 1.21E-12  | Up-regulated |
| NM_001322832 | KCNMA1     | 3778   | 0.0049004 | 0.027405 | 0.351579 | 0.443453 | 1.87187 | 2.93E-07  | 2.92E-06  | Up-regulated |
| NM_001171628 | VEGFA      | 7422   | 16.126    | 17.5954  | 68.3228  | 57.6293  | 1.86775 | 2.53E-73  | 3.75E-71  | Up-regulated |
| NM_014452    | TNFRSF21   | 27242  | 2.93508   | 3.59874  | 12.8647  | 12.2384  | 1.8601  | 2.41E-35  | 1.37E-33  | Up-regulated |
| NM_002429    | MMP19      | 4327   | 0.224074  | 0.185409 | 1.49969  | 1.76651  | 1.8592  | 1.19E-07  | 1.25E-06  | Up-regulated |
| NM_006759    | UGP2       | 7360   | 15.2267   | 12.0145  | 50.578   | 51.4672  | 1.85585 | 3.04E-52  | 2.93E-50  | Up-regulated |
| NM_001306130 | FN1        | 2335   | 0.196696  | 0.116074 | 0.852292 | 1.06823  | 1.84509 | 2.33E-08  | 2.65E-07  | Up-regulated |
| NM_001330397 | MKS1       | 54903  | 0.147708  | 0.001889 | 3.31193  | 2.28969  | 1.84051 | 4.06E-07  | 3.97E-06  | Up-regulated |
| NM_1173701   | WARS       | 7453   | 69.8685   | 69.8727  | 252.493  | 245.944  | 1.83531 | 0         | 0         | Up-regulated |
| NM_001303050 | MAPRE3     | 22924  | 1.80443   | 1.56721  | 8.6704   | 6.62346  | 1.82447 | 1.00E-11  | 1.60E-10  | Up-regulated |
| NM_000636    | SOD2       | 6648   | 9.26816   | 7.38468  | 31.6211  | 28.9866  | 1.81714 | 5.17E-51  | 4.87E-49  | Up-regulated |
| NM_002659    | PLAUR      | 5329   | 35.0166   | 35.3857  | 124.298  | 124.372  | 1.81296 | 3.03E-173 | 1.56E-170 | Up-regulated |
| NM_001547    | IFIT2      | 3433   | 8.06702   | 8.48778  | 29.5279  | 29.4394  | 1.81263 | 6.63E-101 | 1.41E-98  | Up-regulated |
| NM_001171626 | VEGFA      | 7422   | 6.0167    | 7.33026  | 22.9277  | 25.6315  | 1.80775 | 2.07E-44  | 1.58E-42  | Up-regulated |
| NM_001270929 | IFIT1      | 3434   | 0.552489  | 0.63715  | 2.21509  | 4.04669  | 1.79619 | 1.20E-08  | 1.41E-07  | Up-regulated |
| NM_001549    | IFIT3      | 3437   | 26.1163   | 28.9625  | 96.8939  | 94.6444  | 1.7876  | 6.61E-147 | 2.74E-144 | Up-regulated |
| NM_000582    | SPP1       | 6696   | 9.45734   | 8.50311  | 31.6045  | 32.6397  | 1.78103 | 1.73E-40  | 1.17E-38  | Up-regulated |
| NM_013447    | ADGRE2     | 30817  | 1.74765   | 1.60905  | 6.19904  | 5.84736  | 1.77644 | 5.16E-36  | 2.99E-34  | Up-regulated |
| NM_001282922 | RGS3       | 5998   | 1.90089   | 1.18766  | 6.05322  | 7.51993  | 1.77325 | 1.03E-10  | 1.51E-09  | Up-regulated |
| NM_138440    | VASN       | 114990 | 4.88656   | 4.59671  | 17.5248  | 16.1945  | 1.7724  | 5.68E-40  | 3.76E-38  | Up-regulated |
| NM_001709    | BDNF       | 627    | 0.483052  | 0.353223 | 2.12169  | 2.06549  | 1.76927 | 9.41E-09  | 1.12E-07  | Up-regulated |
| NM_199121    | VWA1       | 64856  | 0.635986  | 0.382565 | 2.55733  | 2.39057  | 1.7638  | 6.01E-09  | 7.32E-08  | Up-regulated |
| NM_181671    | PITPNC1    | 26207  | 6.31688   | 6.14217  | 21.6822  | 20.8614  | 1.75884 | 6.21E-126 | 1.83E-123 | Up-regulated |
| NM_001001890 | RUNX1      | 861    | 4.24871   | 4.93778  | 15.6988  | 15.7894  | 1.75119 | 4.56E-75  | 7.14E-73  | Up-regulated |
| NM_004430    | EGR3       | 1960   | 9.64373   | 10.1718  | 33.6315  | 32.9654  | 1.73784 | 4.97E-128 | 1.48E-125 | Up-regulated |
| NM_005252    | FOS        | 2353   | 19.8658   | 17.96    | 63.9648  | 63.2723  | 1.73307 | 5.20E-100 | 1.08E-97  | Up-regulated |
| NM_001130967 | ZNF385A    | 25946  | 7.6613    | 11.1959  | 33.6555  | 32.8129  | 1.71472 | 3.94E-23  | 1.37E-21  | Up-regulated |
| NM_001024660 | KALRN      | 8997   | 0.332351  | 0.372838 | 1.45836  | 1.16473  | 1.7123  | 2.34E-15  | 5.12E-14  | Up-regulated |
| NM_001142624 | RAB34      | 83871  | 0.93941   | 1.01779  | 7.05785  | 4.8202   | 1.70861 | 6.32E-07  | 6.03E-06  | Up-regulated |
| NM_001003943 | BMF        | 90427  | 0.769599  | 1.03623  | 3.23823  | 3.83798  | 1.70554 | 7.56E-12  | 1.22E-10  | Up-regulated |
| NM_001290060 | SEMA3B     | 7869   | 10.0756   | 6.96575  | 28.9295  | 29.8885  | 1.69471 | 2.29E-24  | 8.56E-23  | Up-regulated |
| NM_212476    | FN1        | 2335   | 11.8319   | 11.19    | 37.4033  | 37.1973  | 1.69304 | 6.06E-238 | 3.86E-235 | Up-regulated |
| NM_001042522 | SPRED3     | 399473 | 0.600979  | 0.511548 | 2.50182  | 2.04313  | 1.69046 | 5.27E-10  | 7.20E-09  | Up-regulated |
| NM_005516    | HLA-E      | 3133   | 131.923   | 127.248  | 414.677  | 418.76   | 1.68734 | 0         | 0         | Up-regulated |
| NM_003654    | CHST1      | 8534   | 9.35254   | 9.50701  | 31.0337  | 30.1176  | 1.68318 | 7.03E-107 | 1.62E-104 | Up-regulated |
| NM_001295    | CCR1       | 1230   | 3.16689   | 3.30764  | 10.8175  | 11.1056  | 1.67237 | 7.69E-25  | 2.97E-23  | Up-regulated |
| NM_016352    | CPA4       | 51200  | 0.284705  | 0.35353  | 1.86542  | 1.92738  | 1.66603 | 1.55E-06  | 1.40E-05  | Up-regulated |
| NM_001323506 | OSMR       | 9180   | 2.14289   | 1.65185  | 6.16427  | 6.75642  | 1.65993 | 4.83E-21  | 1.51E-19  | Up-regulated |
| NM_183415    | UBE3B      | 89910  | 1.2948    | 0.961789 | 3.96476  | 4.04271  | 1.65712 | 4.85E-15  | 1.03E-13  | Up-regulated |
| NM_005127    | CLEC2B     | 9976   | 9.56774   | 8.80116  | 28.5045  | 31.1384  | 1.6548  | 2.25E-41  | 1.58E-39  | Up-regulated |

|              |               |        |          |          |          |          |         |           |           |              |
|--------------|---------------|--------|----------|----------|----------|----------|---------|-----------|-----------|--------------|
| NM_002463    | MX2           | 4600   | 3.61526  | 3.56812  | 13.0862  | 10.9813  | 1.65243 | 5.34E-23  | 1.85E-21  | Up-regulated |
| NM_001347424 | M_00134742    | NA     | 0.670484 | 0.554795 | 2.28757  | 2.3449   | 1.65187 | 1.54E-10  | 2.23E-09  | Up-regulated |
| NM_006022    | TSC22D1       | 8848   | 30.6361  | 31.7923  | 93.6215  | 100.256  | 1.62913 | 1.34E-158 | 6.08E-156 | Up-regulated |
| NM_001193397 | PTPA          | 5524   | 17.0779  | 19.6811  | 59.8043  | 55.4419  | 1.6254  | 7.13E-64  | 8.79E-62  | Up-regulated |
| NM_001161779 | PDP1          | 54704  | 0.5125   | 0.655042 | 2.0932   | 2.71568  | 1.62082 | 3.40E-08  | 3.78E-07  | Up-regulated |
| NM_001330396 | GRAMD1B       | 57476  | 2.22127  | 2.30806  | 7.15841  | 7.0371   | 1.61218 | 5.53E-47  | 4.57E-45  | Up-regulated |
| NM_001710    | CFB           | 629    | 0.410567 | 0.446013 | 2.43512  | 2.06147  | 1.61181 | 1.90E-06  | 1.69E-05  | Up-regulated |
| NM_005429    | VEGFC         | 7424   | 1.1996   | 1.18622  | 4.56828  | 4.77138  | 1.61028 | 1.30E-08  | 1.52E-07  | Up-regulated |
| NM_001130026 | TCAF2         | 285966 | 2.2872   | 1.93015  | 6.98972  | 6.62434  | 1.60811 | 8.12E-24  | 2.92E-22  | Up-regulated |
| NM_006576    | AVIL          | 10677  | 0.532351 | 0.550718 | 2.46626  | 2.24697  | 1.59498 | 4.41E-07  | 4.29E-06  | Up-regulated |
| NM_003937    | KYNU          | 8942   | 11.6615  | 11.4231  | 34.3931  | 37.0564  | 1.59246 | 9.36E-41  | 6.39E-39  | Up-regulated |
| NM_003897    | IER3          | 8870   | 370.145  | 354.154  | 1088.41  | 1086.51  | 1.58907 | 0         | 0         | Up-regulated |
| NM_002250    | KCNN4         | 3783   | 89.4085  | 90.0218  | 273.494  | 265.474  | 1.5878  | 0         | 0         | Up-regulated |
| NM_001346468 | M_00134646    | NA     | 0        | 0.00592  | 3.33793  | 0.908598 | 1.5845  | 6.61E-06  | 5.39E-05  | Up-regulated |
| NM_001307939 | ARID3B        | 10620  | 0.18481  | 0.221877 | 1.03449  | 1.2962   | 1.58224 | 6.64E-06  | 5.41E-05  | Up-regulated |
| NM_001278162 | HIPK3         | 10114  | 0.218903 | 0.154172 | 1.07579  | 0.755264 | 1.57859 | 2.81E-06  | 2.43E-05  | Up-regulated |
| NM_017523    | XAF1          | 54739  | 2.35528  | 2.31273  | 6.39701  | 9.56774  | 1.57736 | 8.34E-12  | 1.34E-10  | Up-regulated |
| NM_022834    | VWA1          | 64856  | 13.5121  | 14.5832  | 44.7531  | 40.0359  | 1.57719 | 2.04E-77  | 3.30E-75  | Up-regulated |
| NM_002204    | ITGA3         | 3675   | 41.5925  | 42.2807  | 128.875  | 121.255  | 1.57519 | 2.62E-238 | 1.73E-235 | Up-regulated |
| NM_001320035 | GRAMD1A       | 57655  | 2.46143  | 1.1958   | 6.82295  | 7.92223  | 1.56788 | 2.22E-07  | 2.25E-06  | Up-regulated |
| NM_001243775 | LIMA1         | 51474  | 0.314303 | 0.247175 | 1.47263  | 1.59318  | 1.555   | 7.49E-06  | 6.05E-05  | Up-regulated |
| NM_004029    | IRF7          | 3665   | 6.02735  | 6.70923  | 20.6484  | 18.62    | 1.55052 | 4.94E-23  | 1.72E-21  | Up-regulated |
| NM_005115    | MVP           | 9961   | 67.592   | 67.6541  | 202.601  | 192.998  | 1.54823 | 1.81E-261 | 1.24E-258 | Up-regulated |
| NM_002526    | NTSE          | 4907   | 7.78136  | 7.5243   | 21.9639  | 23.1839  | 1.5432  | 1.35E-67  | 1.79E-65  | Up-regulated |
| NM_213662    | STAT3         | 6774   | 0.52884  | 1.29416  | 4.28602  | 3.56194  | 1.54209 | 1.67E-06  | 1.49E-05  | Up-regulated |
| NM_018004    | TMEM45A       | 55076  | 27.5537  | 26.0243  | 76.1365  | 80.2935  | 1.53137 | 4.22E-74  | 6.30E-72  | Up-regulated |
| NM_001178020 | BEAN1         | 146227 | 0.337851 | 0.438431 | 2.06443  | 1.7825   | 1.53063 | 8.16E-06  | 6.53E-05  | Up-regulated |
| NM_001204478 | VP23C-CDR1    | 1E+08  | 1.07071  | 0.63515  | 3.10507  | 3.88466  | 1.52638 | 1.42E-06  | 1.29E-05  | Up-regulated |
| NM_001171624 | VEGFA         | 7422   | 4.48511  | 3.65579  | 12.4087  | 12.0616  | 1.52524 | 4.60E-25  | 1.79E-23  | Up-regulated |
| NM_002203    | ITGA2         | 3673   | 3.21488  | 2.96317  | 8.74883  | 9.32431  | 1.52362 | 3.16E-49  | 2.81E-47  | Up-regulated |
| NM_006045    | itative)(ATP9 | 10079  | 0.401099 | 0.50111  | 1.56097  | 1.52299  | 1.52175 | 2.33E-09  | 2.96E-08  | Up-regulated |
| NM_212478    | FN1           | 2335   | 4.72847  | 7.56091  | 20.4905  | 25.0453  | 1.52055 | 1.62E-07  | 1.68E-06  | Up-regulated |
| NM_001197246 | BTN3A2        | 11118  | 0.61262  | 0.515854 | 2.04101  | 2.96697  | 1.51225 | 5.64E-06  | 4.68E-05  | Up-regulated |
| NM_024080    | TRPM8         | 79054  | 6.83275  | 7.15241  | 19.9998  | 20.0574  | 1.50748 | 6.65E-87  | 1.21E-84  | Up-regulated |
| NM_001190945 | TRAF1         | 7185   | 11.3619  | 8.82792  | 29.2631  | 29.5589  | 1.50373 | 9.55E-35  | 5.30E-33  | Up-regulated |
| NM_001251830 | SPP1          | 6696   | 0.268839 | 0.603454 | 3.1127   | 2.90976  | 1.50255 | 3.44E-05  | 0.0002433 | Up-regulated |
| NM_003186    | TAGLN         | 6876   | 0.929064 | 1.24744  | 4.78379  | 6.73723  | 1.50109 | 1.84E-05  | 0.000137  | Up-regulated |
| NM_006988    | ADAMTS1       | 9510   | 40.891   | 41.4036  | 117.908  | 114.426  | 1.49809 | 1.66E-296 | 1.44E-293 | Up-regulated |
| NM_001004356 | FGFRL1        | 53834  | 4.36394  | 5.08817  | 13.1529  | 14.5733  | 1.49443 | 1.02E-24  | 3.93E-23  | Up-regulated |
| NM_017890    | VPS13B        | 157680 | 0.139652 | 0.163554 | 0.470246 | 0.806078 | 1.49421 | 4.89E-06  | 4.08E-05  | Up-regulated |
| NM_001130713 | LEF1          | 51176  | 13.0819  | 12.197   | 38.6009  | 33.7769  | 1.49416 | 3.77E-51  | 3.58E-49  | Up-regulated |
| NM_021034    | IFITM3        | 10410  | 455.769  | 424.847  | 1232.51  | 1244.82  | 1.49386 | 3.25E-201 | 1.88E-198 | Up-regulated |
| NM_001621    | AHR           | 196    | 4.5334   | 4.30896  | 12.5793  | 12.5921  | 1.48993 | 1.32E-60  | 1.46E-58  | Up-regulated |
| NM_001134738 | BCL6          | 604    | 0.747044 | 2.11028  | 4.82385  | 9.50206  | 1.48957 | 2.01E-05  | 0.0001492 | Up-regulated |
| NM_014918    | CHSY1         | 22856  | 21.2257  | 22.8881  | 61.6063  | 62.5786  | 1.4889  | 5.25E-146 | 2.14E-143 | Up-regulated |
| NM_033023    | PDGFA         | 5154   | 1.61688  | 1.63302  | 5.21315  | 5.11289  | 1.48817 | 9.90E-11  | 1.46E-09  | Up-regulated |
| NM_001024213 | SI00A13       | 6284   | 80.9802  | 105.364  | 259.571  | 281.49   | 1.48726 | 1.37E-25  | 5.50E-24  | Up-regulated |
| NM_153046    | TDRD9         | 122402 | 0.160937 | 0.188641 | 0.976821 | 0.866819 | 1.48641 | 2.61E-05  | 0.0001893 | Up-regulated |
| NM_005110    | GFPT2         | 9945   | 0.556365 | 0.460438 | 1.92798  | 2.27984  | 1.48593 | 4.85E-06  | 4.05E-05  | Up-regulated |
| NM_001079520 | DACT1         | 51339  | 0.515754 | 0.138057 | 2.03315  | 2.46587  | 1.48557 | 4.23E-05  | 0.0002931 | Up-regulated |
| NM_206866    | BACH1         | 571    | 5.32404  | 4.81404  | 13.7679  | 15.0555  | 1.48189 | 4.07E-46  | 3.30E-44  | Up-regulated |
| NM_014903    | NAV3          | 89795  | 0.310547 | 0.361652 | 1.12355  | 1.10158  | 1.48176 | 6.85E-09  | 8.30E-08  | Up-regulated |
| NM_002535    | OAS2          | 4939   | 3.67783  | 3.79527  | 10.8832  | 10.6314  | 1.47996 | 5.35E-29  | 2.49E-27  | Up-regulated |
| NM_001114182 | IRAK4         | 51135  | 0.449347 | 0.815038 | 2.29227  | 2.6082   | 1.47934 | 2.37E-06  | 2.07E-05  | Up-regulated |
| NM_004603    | STX1A         | 6804   | 6.87977  | 6.89646  | 19.9192  | 19.71    | 1.47773 | 1.33E-29  | 6.30E-28  | Up-regulated |
| NM_004143    | CITED1        | 4435   | 11.5874  | 13.0402  | 37.1716  | 34.21    | 1.47471 | 2.42E-23  | 8.53E-22  | Up-regulated |
| NM_001145033 | C11orf96      | 387763 | 10.4412  | 11.8997  | 30.4304  | 34.5359  | 1.47283 | 7.84E-21  | 2.43E-19  | Up-regulated |
| NM_016612    | SLC25A37      | 51312  | 0.814935 | 0.852791 | 2.8607   | 2.5      | 1.46775 | 1.33E-09  | 1.74E-08  | Up-regulated |
| NM_001202523 | DDR1          | 780    | 2.18835  | 2.45574  | 8.24715  | 6.04459  | 1.46756 | 8.75E-12  | 1.40E-10  | Up-regulated |
| NM_016817    | OAS2          | 4939   | 3.16928  | 2.94293  | 9.46561  | 8.33673  | 1.46694 | 2.18E-19  | 6.23E-18  | Up-regulated |
| NM_001163258 | FAM63A        | 55793  | 5.46474  | 3.93181  | 13.6642  | 14.5464  | 1.46672 | 1.02E-13  | 1.95E-12  | Up-regulated |
| NM_153690    | FAM43A        | 131583 | 8.19362  | 7.82402  | 22.1306  | 22.6956  | 1.46356 | 5.30E-50  | 4.78E-48  | Up-regulated |
| NM_017617    | NOTCH1        | 4851   | 1.42465  | 1.46489  | 4.3315   | 3.91949  | 1.4627  | 4.91E-26  | 2.02E-24  | Up-regulated |
| NM_032420    | PCDH1         | 5097   | 1.56071  | 1.75534  | 5.20958  | 4.59945  | 1.4616  | 4.69E-15  | 1.00E-13  | Up-regulated |
| NM_001134336 | STRIP2        | 57464  | 2.21382  | 1.89817  | 5.60997  | 7.32253  | 1.45678 | 7.44E-10  | 1.00E-08  | Up-regulated |
| NM_001303237 | ISG20         | 3669   | 1.1588   | 0.584884 | 4.14558  | 4.28588  | 1.45492 | 2.82E-05  | 0.0002029 | Up-regulated |
| NR_026947    | C1RL-AS1      | 283314 | 0.433609 | 0.398626 | 1.78913  | 1.294    | 1.45183 | 2.88E-06  | 2.49E-05  | Up-regulated |
| NM_019032    | ADAMTSL4      | 54507  | 0.181321 | 0.262655 | 1.21848  | 1.03108  | 1.44911 | 3.99E-05  | 0.0002787 | Up-regulated |
| NM_001010938 | TNK2          | 10188  | 0.589048 | 0.903774 | 2.47264  | 2.74641  | 1.44853 | 6.29E-07  | 6.00E-06  | Up-regulated |
| NM_002010    | SEMA4B        | 10509  | 6.69566  | 4.84238  | 18.8342  | 14.9334  | 1.44798 | 6.52E-15  | 1.37E-13  | Up-regulated |
| NM_004031    | IRF7          | 3665   | 15.6315  | 10.8721  | 41.063   | 35.8823  | 1.44764 | 2.49E-16  | 5.76E-15  | Up-regulated |
| NM_021923    | FGFRL1        | 53834  | 10.0615  | 9.44361  | 27.656   | 26.2329  | 1.44629 | 1.72E-52  | 1.66E-50  | Up-regulated |
| NM_001080437 | SNED1         | 25992  | 5.65848  | 5.82686  | 15.8366  | 15.6369  | 1.44462 | 1.91E-80  | 3.20E-78  | Up-regulated |
| NM_015017    | USP33         | 23032  | 0.378431 | 0.216175 | 1.2259   | 1.47519  | 1.44459 | 2.63E-05  | 0.0001906 | Up-regulated |
| NM_018284    | GBP3          | 2635   | 2.55808  | 3.04151  | 7.57981  | 8.97577  | 1.44421 | 2.60E-13  | 4.80E-12  | Up-regulated |
| NM_000757    | CSF1          | 1435   | 1.1654   | 1.85533  | 5.13405  | 4.44425  | 1.43604 | 1.48E-08  | 1.72E-07  | Up-regulated |
| NM_001035534 | FAM129B       | 64855  | 10.8915  | 16.1553  | 39.5866  | 60.5827  | 1.43475 | 4.37E-06  | 3.68E-05  | Up-regulated |
| NM_000872    | HTR7          | 3363   | 0.975106 | 0.929323 | 2.82116  | 3.56927  | 1.43299 | 3.03E-07  | 3.01E-06  | Up-regulated |
| NM_002043    | GABRR2        | 2570   | 0.782936 | 0.982864 | 2.88489  | 2.65278  | 1.43254 | 8.29E-09  | 9.90E-08  | Up-regulated |
| NM_005737    | ARL4C         | 10123  | 3.30796  | 2.69082  | 8.35715  | 8.62791  | 1.43207 | 6.88E-19  | 1.88E-17  | Up-regulated |
| NM_005514    | HLA-B         | 3106   | 77.5105  | 73.2803  | 214.147  | 193.676  | 1.42763 | 5.37E-89  | 1.01E-86  | Up-regulated |
| NM_001197181 | TUBB3         | 10381  | 3.77421  | 8.03935  | 20.2344  | 19.1424  | 1.42144 | 4.88E-07  | 4.73E-06  | Up-regulated |
| NM_001320879 | ANXA7         | 310    | 0.763778 | 0.609874 | 2.88701  | 2.54779  | 1.41965 | 1.31E-05  | 0.0001009 | Up-regulated |
| NM_002458    | MUC5B         | 727897 | 2.35001  | 2.42837  | 6.74216  | 6.16171  | 1.41923 | 2.58E-62  | 2.97E-60  | Up-regulated |

|              |              |        |           |          |          |          |         |           |           |              |
|--------------|--------------|--------|-----------|----------|----------|----------|---------|-----------|-----------|--------------|
| NM_198213    | OASL         | 8638   | 1.58138   | 0.570643 | 5.88337  | 4.8182   | 1.41496 | 6.59E-05  | 0.00044   | Up-regulated |
| NM_001134367 | SLC6A6       | 6533   | 0.512724  | 0.613999 | 3.14117  | 1.3815   | 1.41331 | 2.15E-05  | 0.0001585 | Up-regulated |
| NR_135640    | IFI44        | 10561  | 1.6739    | 3.20211  | 9.26661  | 11.0912  | 1.40385 | 3.55E-05  | 0.0002503 | Up-regulated |
| NM_004530    | MMP2         | 4313   | 21.7314   | 22.3734  | 57.6644  | 58.9881  | 1.40321 | 0.0033103 | 0.0143423 | Up-regulated |
| NM_031857    | PCDHA9       | 9752   | 0.247435  | 0.252852 | 0.936173 | 0.983311 | 1.40233 | 1.59E-05  | 0.0001204 | Up-regulated |
| NM_001124758 | SPNS2        | 124976 | 1.40743   | 1.24338  | 3.90103  | 4.05287  | 1.40163 | 1.62E-09  | 2.10E-08  | Up-regulated |
| NM_001199155 | KAT7         | 11143  | 1.50831   | 1.16233  | 4.81718  | 3.59756  | 1.39996 | 1.29E-07  | 1.34E-06  | Up-regulated |
| NR_138072    | ARRDC3       | 57561  | 0.196392  | 0.495183 | 1.3568   | 2.43583  | 1.39957 | 0.0001051 | 0.0006743 | Up-regulated |
| NM_024496    | IRF2BPL      | 64207  | 36.5381   | 35.3426  | 95.9976  | 93.4722  | 1.39841 | 8.84E-207 | 5.28E-204 | Up-regulated |
| NM_001278642 | EDIL3        | 10085  | 1.04775   | 0.513397 | 2.71822  | 2.87868  | 1.39752 | 6.99E-06  | 5.68E-05  | Up-regulated |
| NM_006820    | IFI44L       | 10964  | 5.12846   | 5.14642  | 13.6255  | 13.6068  | 1.39182 | 5.40E-58  | 5.67E-56  | Up-regulated |
| NM_001198621 | XIRP1        | 165904 | 0.0147545 | 0.241958 | 1.91231  | 1.5227   | 1.38854 | 0.0001177 | 0.0007465 | Up-regulated |
| NM_017458    | MVP          | 9961   | 17.0388   | 18.1784  | 44.6101  | 48.3338  | 1.38717 | 9.06E-63  | 1.07E-60  | Up-regulated |
| NM_000328    | RPGR         | 6103   | 3.30936   | 3.01104  | 9.06447  | 8.38734  | 1.38705 | 1.72E-16  | 4.02E-15  | Up-regulated |
| NM_080424    | SP110        | 3431   | 0.566362  | 0.902548 | 3.00587  | 2.68818  | 1.38571 | 2.39E-05  | 0.0001744 | Up-regulated |
| NM_001323505 | OSMR         | 9180   | 0.922764  | 1.80523  | 5.52181  | 3.68462  | 1.38101 | 4.01E-06  | 3.39E-05  | Up-regulated |
| NM_014718    | CLSTN3       | 9746   | 2.95773   | 3.43706  | 8.78291  | 8.5401   | 1.3799  | 4.60E-20  | 1.37E-18  | Up-regulated |
| NM_001330616 | AK4          | 205    | 0.380345  | 0.33119  | 1.50925  | 1.01378  | 1.37523 | 1.30E-05  | 9.99E-05  | Up-regulated |
| NM_000186    | CFH          | 3075   | 1.06026   | 0.67099  | 2.72096  | 2.86392  | 1.37374 | 1.55E-06  | 1.40E-05  | Up-regulated |
| NM_024607    | PPP1R3B      | 79660  | 0.568868  | 0.392669 | 1.40342  | 1.97909  | 1.37062 | 1.10E-05  | 8.62E-05  | Up-regulated |
| NM_203330    | CD59         | 966    | 0.974875  | 1.17876  | 2.61011  | 3.62265  | 1.37031 | 1.68E-09  | 2.17E-08  | Up-regulated |
| NM_021727    | FADS3        | 3995   | 33.4531   | 36.7461  | 91.6379  | 90.6767  | 1.36838 | 3.69E-75  | 5.82E-73  | Up-regulated |
| NM_001647    | APOD         | 347    | 256.601   | 252.988  | 656.365  | 655.807  | 1.36798 | 0         | 0         | Up-regulated |
| NM_001136275 | AKIRIN1      | 79647  | 0.373989  | 1.02064  | 2.60936  | 4.87809  | 1.36748 | 0.0001499 | 0.000931  | Up-regulated |
| NM_001256264 | FLII         | 2314   | 0.0014897 | 0.001984 | 0.453383 | 3.24785  | 1.3659  | 6.63E-05  | 0.0004428 | Up-regulated |
| NM_001303533 | RAPGEFL1     | 51195  | 0.876032  | 0.678548 | 2.40696  | 2.68867  | 1.36294 | 3.34E-06  | 2.86E-05  | Up-regulated |
| NM_002318    | LOXL2        | 4017   | 10.8225   | 11.4799  | 28.7163  | 29.0406  | 1.36269 | 2.34E-68  | 3.19E-66  | Up-regulated |
| NM_152657    | GGN          | 199720 | 0.804052  | 1.065    | 3.7308   | 3.03279  | 1.36175 | 2.57E-05  | 0.0001868 | Up-regulated |
| NM_004688    | NMI          | 9111   | 6.54909   | 6.21724  | 17.1507  | 17.5445  | 1.36034 | 9.31E-15  | 1.94E-13  | Up-regulated |
| NM_022147    | RTP4         | 64108  | 8.62687   | 8.38999  | 21.8092  | 25.9047  | 1.35985 | 7.44E-11  | 1.11E-09  | Up-regulated |
| NM_002800    | PSMB9        | 5698   | 51.2958   | 49.3908  | 133.417  | 126.125  | 1.35674 | 2.81E-62  | 3.21E-60  | Up-regulated |
| NM_015886    | PII5         | 51050  | 9.17529   | 8.8232   | 23.2031  | 22.9798  | 1.35423 | 1.24E-101 | 2.67E-99  | Up-regulated |
| NM_001143677 | SGK1         | 6446   | 11.2741   | 12.6985  | 33.2202  | 29.3386  | 1.35029 | 1.55E-29  | 7.34E-28  | Up-regulated |
| NM_004335    | BST2         | 684    | 229.969   | 217.178  | 583.662  | 554.164  | 1.34721 | 3.31E-145 | 1.26E-142 | Up-regulated |
| NM_001572    | IRF7         | 3665   | 32.7638   | 37.6049  | 90.9364  | 89.5766  | 1.34685 | 3.85E-58  | 4.06E-56  | Up-regulated |
| NM_001272067 | SHISA5       | 51246  | 7.16684   | 5.60724  | 15.565   | 19.0391  | 1.34607 | 3.31E-13  | 6.05E-12  | Up-regulated |
| NM_139276    | STAT3        | 6774   | 21.2131   | 22.3787  | 53.6413  | 57.425   | 1.34479 | 2.99E-102 | 6.50E-100 | Up-regulated |
| NM_001193621 | PINLYP       | 390940 | 0.71334   | 1.73626  | 8.53628  | 6.17198  | 1.34412 | 0.0002233 | 0.0013298 | Up-regulated |
| NM_001284295 | CHPF2        | 54480  | 2.3835    | 1.25071  | 5.59805  | 6.21297  | 1.34271 | 6.59E-06  | 5.38E-05  | Up-regulated |
| NM_013994    | DDR1         | 780    | 2.01691   | 2.09359  | 4.73324  | 7.27161  | 1.3417  | 7.33E-08  | 7.85E-07  | Up-regulated |
| NM_001216    | CA9          | 768    | 1.09009   | 0.824307 | 3.68137  | 3.84743  | 1.33628 | 8.82E-05  | 0.0005735 | Up-regulated |
| NM_198183    | UBE2L6       | 9246   | 3.63691   | 2.34625  | 9.11171  | 9.02058  | 1.33617 | 9.46E-07  | 8.81E-06  | Up-regulated |
| NM_001548    | IFIT1        | 3434   | 14.0075   | 12.4924  | 33.455   | 33.84    | 1.33468 | 5.05E-65  | 6.31E-63  | Up-regulated |
| NM_033405    | HELZ2        | 85441  | 14.0792   | 13.5123  | 35.0882  | 34.3038  | 1.32933 | 1.30E-143 | 4.77E-141 | Up-regulated |
| NM_015675    | GADD45B      | 4616   | 23.1815   | 23.1353  | 59.605   | 57.4197  | 1.31979 | 5.47E-43  | 4.03E-41  | Up-regulated |
| NM_207660    | ZC3H14       | 79882  | 0.371659  | 0.620561 | 1.61877  | 2.15638  | 1.31442 | 0.0001055 | 0.0006767 | Up-regulated |
| NM_001184866 | FCRLA        | 84824  | 1.67825   | 1.79991  | 4.90356  | 5.07989  | 1.31376 | 1.31E-07  | 1.37E-06  | Up-regulated |
| NM_005384    | NFIL3        | 4783   | 4.77557   | 5.27568  | 13.6796  | 12.5483  | 1.30679 | 1.70E-14  | 3.47E-13  | Up-regulated |
| NM_144579    | SFXN5        | 94097  | 0.535602  | 0.819324 | 2.24425  | 2.1007   | 1.3067  | 1.49E-05  | 0.0001135 | Up-regulated |
| NM_001319096 | ARID5A       | 10865  | 4.38173   | 3.44406  | 12.1745  | 9.40382  | 1.30573 | 1.37E-08  | 1.61E-07  | Up-regulated |
| NM_173344    | ST3GAL1      | 6482   | 6.22218   | 5.81346  | 14.3483  | 15.6414  | 1.30191 | 1.97E-47  | 1.64E-45  | Up-regulated |
| NM_001306132 | FN1          | 2335   | 0.394714  | 0.623025 | 1.30493  | 1.9123   | 1.30062 | 1.61E-05  | 0.0001214 | Up-regulated |
| NM_032108    | SEMA6B       | 10501  | 20.8305   | 22.4291  | 54.5075  | 52.3111  | 1.29879 | 2.27E-87  | 4.21E-85  | Up-regulated |
| NM_001720    | BMP8B        | 656    | 18.9463   | 19.4772  | 47.1123  | 47.1348  | 1.29317 | 4.53E-132 | 1.47E-129 | Up-regulated |
| NM_005099    | ADAMT54      | 9507   | 16.25     | 17.7363  | 45.498   | 38.8262  | 1.29175 | 1.22E-38  | 7.75E-37  | Up-regulated |
| NM_033027    | CSRN1P       | 64651  | 8.86294   | 7.74223  | 20.7907  | 20.5879  | 1.29164 | 1.41E-31  | 7.18E-30  | Up-regulated |
| NM_002985    | CCL5         | 6352   | 3.10114   | 3.23918  | 9.5395   | 8.88175  | 1.29161 | 1.66E-06  | 1.49E-05  | Up-regulated |
| NM_001706    | BCL6         | 604    | 8.09297   | 7.13072  | 18.5117  | 19.3601  | 1.28992 | 4.20E-32  | 2.20E-30  | Up-regulated |
| NR_120431    | OC10050706   | 1E+08  | 2.61272   | 2.06622  | 7.70097  | 9.92892  | 1.28645 | 0.0001525 | 0.0009456 | Up-regulated |
| NM_001166349 | SLC26A11     | 284129 | 0.60967   | 0.379879 | 1.69017  | 2.4451   | 1.28582 | 0.0002643 | 0.0015496 | Up-regulated |
| NM_001258432 | NDRG1        | 10397  | 0.455732  | 0.444432 | 1.55464  | 1.84374  | 1.28577 | 0.0001673 | 0.0010253 | Up-regulated |
| NM_182763    | MCL1         | 4170   | 2.00131   | 2.27396  | 5.07766  | 6.23829  | 1.28543 | 3.54E-10  | 4.95E-09  | Up-regulated |
| NM_002223    | ITPR2        | 3709   | 6.24048   | 6.2486   | 15.3656  | 15.1129  | 1.28516 | 7.30E-119 | 1.96E-116 | Up-regulated |
| NM_022168    | IFIH1        | 64135  | 8.35504   | 7.00382  | 19.2117  | 18.8989  | 1.28096 | 1.30E-27  | 5.75E-26  | Up-regulated |
| NM_003335    | UBA7         | 7318   | 1.54774   | 1.52714  | 4.06998  | 4.15896  | 1.27521 | 1.46E-08  | 1.70E-07  | Up-regulated |
| NM_000201    | ICAM1        | 3383   | 47.5241   | 50.9999  | 119.886  | 118.573  | 1.27449 | 5.74E-133 | 1.89E-130 | Up-regulated |
| NM_014314    | DDX58        | 23586  | 4.98455   | 5.85835  | 12.8759  | 13.7766  | 1.26653 | 1.82E-25  | 7.23E-24  | Up-regulated |
| NM_001293304 | CEMIP        | 57214  | 0.929145  | 2.5572   | 9.34008  | 8.92949  | 1.26593 | 0.0005049 | 0.0027722 | Up-regulated |
| NR_026698    | KPNA1        | 3836   | 0.117557  | 0.294672 | 1.02691  | 0.809491 | 1.26569 | 0.0004196 | 0.0023558 | Up-regulated |
| NM_001193655 | C17orf62     | 79415  | 1.88844   | 3.34535  | 9.18214  | 6.61577  | 1.26489 | 1.82E-05  | 0.0001358 | Up-regulated |
| NM_001171625 | VEGFA        | 7422   | 0.726138  | 0.196314 | 2.15831  | 2.51411  | 1.26028 | 0.0005199 | 0.0028456 | Up-regulated |
| NM_001289403 | MMS19        | 64210  | 0.639768  | 0.623122 | 1.99513  | 1.88146  | 1.26008 | 3.42E-05  | 0.0002424 | Up-regulated |
| NR_027261    | POLE3        | 54107  | 0.838553  | 1.09225  | 2.99162  | 3.06144  | 1.25689 | 5.53E-05  | 0.0003758 | Up-regulated |
| NM_001220778 | CDKN1A       | 1026   | 6.0324    | 6.53447  | 19.0915  | 13.4063  | 1.25674 | 9.25E-10  | 1.23E-08  | Up-regulated |
| NM_001286624 | MAP3K7CL     | 56911  | 0.73953   | 1.34753  | 4.5861   | 3.78693  | 1.25618 | 0.0003658 | 0.0020801 | Up-regulated |
| NM_182565    | UBALD2       | 283991 | 375.562   | 345.597  | 873.377  | 848.174  | 1.25574 | 3.16E-142 | 1.14E-139 | Up-regulated |
| NM_001174087 | NCOA3        | 8202   | 1.50225   | 1.68112  | 3.95924  | 3.90286  | 1.25466 | 9.69E-18  | 2.47E-16  | Up-regulated |
| NM_000389    | CDKN1A       | 1026   | 58.3428   | 51.3934  | 130.28   | 132.112  | 1.25125 | 1.54E-67  | 2.03E-65  | Up-regulated |
| NM_207315    | CMPK2        | 129607 | 0.858114  | 0.674197 | 2.40355  | 2.34593  | 1.25055 | 5.32E-05  | 0.0003629 | Up-regulated |
| NM_003150    | STAT3        | 6774   | 8.72832   | 7.47285  | 19.9177  | 19.1308  | 1.24919 | 5.29E-35  | 2.97E-33  | Up-regulated |
| NM_000313    | alpha)(PROS1 | 5627   | 28.8696   | 30.2987  | 72.9976  | 67.9867  | 1.24853 | 5.34E-84  | 9.28E-82  | Up-regulated |
| NM_016733    | LIMK2        | 3985   | 8.37054   | 7.44977  | 21.3956  | 17.3114  | 1.24812 | 3.31E-19  | 9.31E-18  | Up-regulated |
| NM_002836    | PTPRA        | 5786   | 0.292392  | 0.24084  | 1.32623  | 0.985301 | 1.24541 | 0.0004877 | 0.0026932 | Up-regulated |
| NM_138494    | ZNF655       | 79027  | 1.45317   | 1.10362  | 4.04203  | 2.96237  | 1.24433 | 1.22E-06  | 1.12E-05  | Up-regulated |

|              |                 |        |          |          |         |          |         |           |           |              |
|--------------|-----------------|--------|----------|----------|---------|----------|---------|-----------|-----------|--------------|
| NM_001077427 | LYPD1           | 116372 | 1.6558   | 2.12312  | 4.6814  | 5.15253  | 1.24373 | 2.17E-08  | 2.48E-07  | Up-regulated |
| NM_198282    | TMEM173         | 340061 | 7.47153  | 6.47159  | 17.4048 | 16.6555  | 1.24255 | 1.76E-17  | 4.39E-16  | Up-regulated |
| NM_001733    | C1R             | 715    | 9.31491  | 9.11738  | 22.9496 | 21.5122  | 1.2403  | 9.10E-26  | 3.68E-24  | Up-regulated |
| NR_110492    | otein coding)   | 55000  | 1.20645  | 0.625747 | 2.34077 | 2.99726  | 1.23939 | 2.10E-05  | 0.000155  | Up-regulated |
| NM_001127695 | CTSA            | 5476   | 1.25033  | 1.91724  | 7.93216 | 3.22415  | 1.23399 | 0.0002894 | 0.0016822 | Up-regulated |
| NM_032648    | FAM167B         | 84734  | 76.9347  | 81.7356  | 193.756 | 180.091  | 1.22906 | 1.92E-55  | 1.95E-53  | Up-regulated |
| NM_144601    | CMTM3           | 123920 | 5.68385  | 3.62208  | 12.7694 | 11.5943  | 1.22742 | 2.40E-07  | 2.42E-06  | Up-regulated |
| NM_018444    | PDP1            | 54704  | 7.88115  | 8.90163  | 19.6262 | 20.0866  | 1.22689 | 1.19E-36  | 7.08E-35  | Up-regulated |
| NM_001288995 | IFI27           | 3429   | 6.93253  | 3.92454  | 26.7527 | 14.8507  | 1.22657 | 0.0004755 | 0.0026347 | Up-regulated |
| NM_139266    | STAT1           | 6772   | 21.8277  | 19.158   | 47.8716 | 48.708   | 1.22528 | 9.57E-47  | 7.78E-45  | Up-regulated |
| NR_028040    | GATS            | 352954 | 1.95083  | 1.07776  | 4.94755 | 4.08721  | 1.22255 | 5.54E-05  | 0.0003764 | Up-regulated |
| NM_203434    | IERSL           | 389792 | 12.7872  | 12.6345  | 28.8138 | 31.075   | 1.22011 | 2.48E-38  | 1.55E-36  | Up-regulated |
| NM_001040661 | SLC29A4         | 222962 | 0.661538 | 1.19496  | 2.85511 | 3.11929  | 1.21997 | 0.0001824 | 0.001106  | Up-regulated |
| NM_199051    | BRINP3          | 339479 | 0.526674 | 0.692951 | 1.90235 | 1.97393  | 1.21877 | 0.0001799 | 0.0010931 | Up-regulated |
| NM_001281445 | catalytic) inhi | 11142  | 33.4855  | 29.4356  | 72.9875 | 75.3952  | 1.21851 | 8.50E-31  | 4.19E-29  | Up-regulated |
| NM_005101    | ISG15           | 9636   | 384.515  | 388.221  | 885.138 | 905.895  | 1.21691 | 2.34E-167 | 1.12E-164 | Up-regulated |
| NM_001065    | TNFRSF1A        | 7132   | 23.0366  | 22.1185  | 52.8983 | 52.4123  | 1.21541 | 1.76E-60  | 1.93E-58  | Up-regulated |
| NM_001318011 | CARD19          | 84270  | 9.80526  | 10.7718  | 23.8863 | 27.8973  | 1.21373 | 1.00E-08  | 1.19E-07  | Up-regulated |
| NM_005419    | STAT2           | 6773   | 26.6268  | 27.02    | 61.0103 | 63.0412  | 1.20929 | 1.80E-131 | 5.64E-129 | Up-regulated |
| NM_152486    | SAMD11          | 148398 | 0.503249 | 0.350771 | 1.77728 | 1.64213  | 1.20915 | 0.0006871 | 0.0036589 | Up-regulated |
| NR_126327    | MESDC2          | 23184  | 5.11825  | 6.0334   | 13.9793 | 12.6279  | 1.20459 | 1.40E-15  | 3.10E-14  | Up-regulated |
| NM_025193    | HSD3B7          | 80270  | 9.79747  | 9.06503  | 22.2781 | 22.0356  | 1.20457 | 6.82E-24  | 2.47E-22  | Up-regulated |
| NM_199002    | ARHGEF1         | 9138   | 9.15089  | 13.6329  | 29.5506 | 25.875   | 1.20363 | 2.69E-11  | 4.15E-10  | Up-regulated |
| NM_001321060 | SIRT6           | 51548  | 1.76357  | 1.02971  | 5.34806 | 4.09847  | 1.2036  | 0.0003715 | 0.0021084 | Up-regulated |
| NM_021153    | CDH19           | 28513  | 11.921   | 12.1368  | 26.7799 | 28.8102  | 1.20311 | 5.19E-70  | 7.28E-68  | Up-regulated |
| NM_001031683 | IFIT3           | 3437   | 22.8574  | 18.8378  | 44.5978 | 53.7412  | 1.20109 | 1.28E-19  | 3.69E-18  | Up-regulated |
| NM_001130142 | VWA5A           | 4013   | 0.875388 | 0.895488 | 2.17879 | 2.78451  | 1.19877 | 3.32E-05  | 0.000236  | Up-regulated |
| NM_001319087 | ARID5A          | 10865  | 2.50895  | 2.51211  | 7.22967 | 5.66134  | 1.19444 | 5.39E-07  | 5.20E-06  | Up-regulated |
| NM_001146187 | PEG3            | 5178   | 4.72952  | 5.17231  | 11.4179 | 11.3998  | 1.19408 | 1.23E-45  | 9.69E-44  | Up-regulated |
| NM_001013635 | CCDC184         | 387856 | 0.613013 | 0.55576  | 2.1827  | 1.91165  | 1.1939  | 0.000531  | 0.0029022 | Up-regulated |
| NM_018379    | FAM63A          | 55793  | 1.87222  | 1.8306   | 4.42909 | 4.93938  | 1.19336 | 2.61E-07  | 2.62E-06  | Up-regulated |
| NM_001128219 | VGLL4           | 9686   | 14.1522  | 14.73    | 34.1302 | 32.1487  | 1.19131 | 3.62E-56  | 3.73E-54  | Up-regulated |
| NM_001079818 | ITGA6           | 3655   | 15.4603  | 16.38    | 35.6473 | 37.1958  | 1.19065 | 1.13E-82  | 1.92E-80  | Up-regulated |
| NM_001242412 | AHRR            | 57491  | 7.27852  | 7.90102  | 18.0593 | 16.8798  | 1.18948 | 2.41E-40  | 1.62E-38  | Up-regulated |
| NM_001206    | KLF9            | 687    | 10.7006  | 11.1246  | 24.9761 | 24.9802  | 1.18928 | 3.73E-69  | 5.17E-67  | Up-regulated |
| NM_004776    | B4GALT5         | 9334   | 52.2943  | 51.6598  | 118.973 | 116.85   | 1.18419 | 9.24E-231 | 5.70E-228 | Up-regulated |
| NM_024019    | NEUROG2         | 63973  | 0.960739 | 0.8947   | 2.67667 | 2.88363  | 1.18292 | 0.0001821 | 0.0011046 | Up-regulated |
| NM_001031801 | LIMK2           | 3985   | 1.8213   | 2.20135  | 4.62373 | 5.55545  | 1.18278 | 7.45E-07  | 7.04E-06  | Up-regulated |
| NM_001166692 | C11orf91        | 1E+08  | 3.11995  | 3.63893  | 9.91945 | 9.77817  | 1.18095 | 0.0001308 | 0.0008232 | Up-regulated |
| NM_005996    | TBX3            | 6926   | 1.30653  | 1.73375  | 3.73635 | 3.78195  | 1.18035 | 6.22E-08  | 6.73E-07  | Up-regulated |
| NM_201382    | PLEC            | 5339   | 4.02414  | 3.26929  | 7.71683 | 11.7209  | 1.18009 | 1.60E-05  | 0.0001207 | Up-regulated |
| NM_0032873   | UBASH3B         | 84959  | 4.40152  | 4.48973  | 10.0186 | 10.2974  | 1.17891 | 1.44E-38  | 9.09E-37  | Up-regulated |
| NM_199139    | XAF1            | 54739  | 1.04361  | 0.60151  | 2.51491 | 2.35234  | 1.17846 | 0.0001928 | 0.0011649 | Up-regulated |
| NM_152347    | EFCAB13         | 124989 | 0.496645 | 0.71257  | 1.71405 | 1.87959  | 1.17561 | 0.0001986 | 0.0011978 | Up-regulated |
| NM_001323682 | NRSN2           | 80023  | 1.19667  | 0.665506 | 3.38902 | 2.71922  | 1.17454 | 0.0005111 | 0.002803  | Up-regulated |
| NM_018584    | CAMK2N1         | 55450  | 7.38939  | 6.38158  | 14.9482 | 17.3752  | 1.17422 | 1.83E-13  | 3.42E-12  | Up-regulated |
| NM_001005376 | PLAUR           | 5329   | 5.15992  | 4.16966  | 11.3842 | 11.7999  | 1.17396 | 2.81E-07  | 2.81E-06  | Up-regulated |
| NM_018948    | ERRF1           | 54206  | 9.00034  | 8.72485  | 20.5542 | 19.8344  | 1.17107 | 4.59E-32  | 2.39E-30  | Up-regulated |
| NM_005214    | CTLA4           | 1493   | 2.59683  | 1.99026  | 5.70396 | 6.2839   | 1.17068 | 1.02E-05  | 8.05E-05  | Up-regulated |
| NM_001012967 | DDX60L          | 91351  | 1.61474  | 1.91755  | 4.12404 | 4.14301  | 1.16878 | 5.57E-13  | 9.98E-12  | Up-regulated |
| NM_002081    | GPC1            | 2817   | 42.9087  | 46.2946  | 103.261 | 97.3651  | 1.16669 | 2.42E-82  | 4.09E-80  | Up-regulated |
| NM_172389    | NFATC1          | 4772   | 0.588502 | 0.639985 | 1.53092 | 1.9226   | 1.16555 | 0.0001068 | 0.0006838 | Up-regulated |
| NM_001260490 | LSR             | 51599  | 0.301779 | 0        | 3.46158 | 2.80201  | 1.16528 | 0.0007389 | 0.0039153 | Up-regulated |
| NM_017950    | CCDC40          | 55036  | 0.326541 | 0.475227 | 1.32443 | 1.24815  | 1.16277 | 0.0005249 | 0.0028697 | Up-regulated |
| NM_006850    | IL24            | 11009  | 1.04756  | 0.553567 | 2.60131 | 3.23234  | 1.16268 | 0.0010062 | 0.0051377 | Up-regulated |
| NM_000574    | lood group)     | 1604   | 4.75579  | 5.65236  | 11.5628 | 12.604   | 1.16085 | 2.37E-13  | 4.40E-12  | Up-regulated |
| NR_047495    | LINC00565       | 1E+08  | 2.46651  | 2.58602  | 5.72706 | 6.60481  | 1.15929 | 1.68E-07  | 1.73E-06  | Up-regulated |
| NM_201589    | MAFA            | 389692 | 2.15889  | 2.28741  | 5.574   | 5.37878  | 1.15878 | 5.80E-07  | 5.55E-06  | Up-regulated |
| NM_000327    | ROM1            | 6094   | 1.01904  | 1.18748  | 3.47387 | 3.13027  | 1.15849 | 0.0003411 | 0.0019532 | Up-regulated |
| NM_015086    | DDN             | 23109  | 0.69475  | 0.876718 | 2.08083 | 2.18435  | 1.15775 | 7.01E-05  | 0.0004663 | Up-regulated |
| NM_001242463 | FBXO32          | 114907 | 0.259188 | 0.292709 | 1.08745 | 0.692868 | 1.15753 | 0.0006652 | 0.0035561 | Up-regulated |
| NM_005711    | EDIL3           | 10085  | 0.14054  | 0.76729  | 2.42005 | 2.36964  | 1.15741 | 0.001529  | 0.007385  | Up-regulated |
| NM_002182    | IL1RAP          | 3556   | 8.36552  | 8.31043  | 19.3126 | 18.1489  | 1.15682 | 4.45E-42  | 3.17E-40  | Up-regulated |
| NR_030767    | ANKRD13D        | 338692 | 0.657683 | 0.893478 | 2.64739 | 2.3759   | 1.15592 | 0.0006319 | 0.0033965 | Up-regulated |
| NM_198590    | lood group)(    | 682    | 1.75776  | 2.52842  | 5.03416 | 6.89594  | 1.15451 | 0.0001511 | 0.0009384 | Up-regulated |
| NM_014962    | BTBD3           | 22903  | 1.66334  | 1.93235  | 4.18124 | 4.26856  | 1.15305 | 3.81E-10  | 5.30E-09  | Up-regulated |
| NM_015995    | KLF13           | 51621  | 7.83359  | 7.77984  | 17.5393 | 17.2226  | 1.14953 | 5.28E-63  | 6.42E-61  | Up-regulated |
| NM_002160    | TNC             | 3371   | 69.8936  | 71.9498  | 157.662 | 156.049  | 1.14835 | 5.84E-289 | 4.65E-286 | Up-regulated |
| NM_175884    | CCDC71L         | 168455 | 15.0656  | 14.203   | 33.0268 | 31.8124  | 1.14537 | 7.69E-84  | 1.32E-81  | Up-regulated |
| NM_017556    | FBLIM1          | 54751  | 0.451001 | 0.526303 | 1.99226 | 1.26759  | 1.14374 | 0.0009747 | 0.0049954 | Up-regulated |
| NM_001037335 | HELZ2           | 85441  | 18.2627  | 20.0813  | 44.3979 | 40.596   | 1.14293 | 4.54E-59  | 4.93E-57  | Up-regulated |
| NM_187841    | TRIM54          | 57159  | 1.64061  | 1.4489   | 4.65832 | 3.75129  | 1.1429  | 0.0001497 | 0.0009303 | Up-regulated |
| NR_125376    | OC10041958      | 1E+08  | 11.2142  | 10.325   | 23.62   | 24.7446  | 1.14135 | 2.07E-21  | 6.54E-20  | Up-regulated |
| NM_032189    | ATP11A          | 23250  | 6.91937  | 6.52271  | 16.5285 | 13.5593  | 1.13971 | 3.47E-24  | 1.28E-22  | Up-regulated |
| NM_020904    | PLEKHA4         | 57664  | 61.8911  | 62.913   | 143.161 | 131.863  | 1.13847 | 4.33E-89  | 8.19E-87  | Up-regulated |
| NM_001198993 | NADK            | 65220  | 0.504919 | 0.662296 | 1.53581 | 2.13647  | 1.13489 | 0.0008168 | 0.0042758 | Up-regulated |
| NM_017918    | MCUB            | 55013  | 2.25119  | 1.81476  | 5.19395 | 6.69007  | 1.13347 | 0.0004418 | 0.0024654 | Up-regulated |
| NM_024958    | NRSN2           | 80023  | 13.9336  | 15.5954  | 34.8319 | 30.9492  | 1.13273 | 3.48E-23  | 1.22E-21  | Up-regulated |
| NM_198593    | C1QTNF1         | 114897 | 0.526704 | 0.653883 | 1.88156 | 1.79791  | 1.1306  | 0.0007896 | 0.0041535 | Up-regulated |
| NM_020309    | SLC17A7         | 57030  | 4.44362  | 3.6406   | 9.39603 | 9.10652  | 1.13008 | 5.03E-11  | 7.61E-10  | Up-regulated |
| NM_001122772 | AGAP2           | 116986 | 5.63851  | 5.73013  | 13.2134 | 11.9403  | 1.12843 | 2.72E-29  | 1.27E-27  | Up-regulated |
| NM_001129899 | KRBOX4          | 55634  | 0.887004 | 0.404593 | 2.54046 | 2.20998  | 1.12728 | 0.0015796 | 0.0075968 | Up-regulated |
| NM_001300783 | PRR16           | 51334  | 1.45922  | 1.61042  | 4.38293 | 4.05706  | 1.12632 | 0.000215  | 0.001286  | Up-regulated |
| NM_002587    | PCDH1           | 5097   | 4.11952  | 4.26372  | 10.1932 | 8.6946   | 1.12453 | 9.61E-14  | 1.85E-12  | Up-regulated |

|              |               |        |           |          |          |          |         |           |           |              |
|--------------|---------------|--------|-----------|----------|----------|----------|---------|-----------|-----------|--------------|
| NM_002228    | JUN           | 3725   | 15.0111   | 13.9281  | 33.4952  | 30.0704  | 1.12147 | 3.72E-32  | 1.95E-30  | Up-regulated |
| NM_213618    | ST5           | 6764   | 29.9758   | 28.0159  | 63.866   | 62.3871  | 1.12143 | 3.94E-91  | 7.60E-89  | Up-regulated |
| NR_028495    | LYRM2         | 57226  | 0.27071   | 0.616784 | 1.42736  | 1.45037  | 1.12078 | 0.0011684 | 0.0058566 | Up-regulated |
| NM_001560    | IL13RA1       | 3597   | 12.7062   | 12.6112  | 28.1772  | 27.0874  | 1.12027 | 5.41E-52  | 5.19E-50  | Up-regulated |
| NM_002290    | LAMA4         | 3910   | 1.39911   | 0.994145 | 3.98236  | 2.22479  | 1.12024 | 8.99E-05  | 0.0005832 | Up-regulated |
| NM_145901    | HMGAI         | 3159   | 30.1546   | 30.373   | 63.1267  | 69.1267  | 1.12012 | 5.17E-46  | 4.15E-44  | Up-regulated |
| NM_003877    | SOCS2         | 8835   | 1.053     | 1.2882   | 2.78074  | 3.41205  | 1.11953 | 0.0001434 | 0.0008946 | Up-regulated |
| NM_016816    | OAS1          | 4938   | 27.1337   | 27.1606  | 61.0858  | 57.4093  | 1.11793 | 1.17E-42  | 8.50E-41  | Up-regulated |
| NM_005415    | SLC20A1       | 6574   | 129.416   | 131.378  | 282.404  | 281.909  | 1.11731 | 1.10E-296 | 9.96E-294 | Up-regulated |
| NM_001032731 | OAS2          | 4939   | 2.08873   | 2.31507  | 5.40067  | 5.33009  | 1.11539 | 9.37E-06  | 7.42E-05  | Up-regulated |
| NM_001128127 | GK            | 2710   | 3.22461   | 3.69084  | 8.46111  | 7.09529  | 1.11486 | 8.33E-12  | 1.34E-10  | Up-regulated |
| NM_019112    | ABCA7         | 10347  | 5.44251   | 5.83353  | 12.8448  | 11.7965  | 1.11411 | 1.27E-31  | 6.47E-30  | Up-regulated |
| NM_001130723 | AHCYL2        | 23382  | 1.93337   | 1.43499  | 4.90979  | 3.32453  | 1.11291 | 1.32E-05  | 0.0001009 | Up-regulated |
| NM_001290062 | SEMA3B        | 7869   | 0.77136   | 1.49837  | 3.50571  | 3.43345  | 1.11107 | 0.0010053 | 0.0051346 | Up-regulated |
| NM_183079    | PRNP          | 5621   | 18.4493   | 21.0713  | 40.0668  | 46.6178  | 1.11072 | 7.23E-23  | 2.48E-21  | Up-regulated |
| NM_018169    | KIAA1551      | 55196  | 3.86817   | 3.90206  | 8.3138   | 8.65411  | 1.10838 | 4.40E-26  | 1.82E-24  | Up-regulated |
| NM_001113363 | TBC1D14       | 57533  | 1.8988    | 2.4003   | 4.6492   | 5.28039  | 1.10837 | 6.31E-08  | 6.82E-07  | Up-regulated |
| NM_001301738 | TMEM173       | 340061 | 3.06262   | 3.50015  | 7.23474  | 8.39925  | 1.10671 | 4.26E-06  | 3.59E-05  | Up-regulated |
| NM_194463    | RNF128        | 79589  | 11.7362   | 12.6136  | 25.4973  | 27.5421  | 1.10664 | 2.85E-28  | 1.30E-26  | Up-regulated |
| NM_001316677 | PTPRE         | 5791   | 0.735605  | 0.242351 | 2.32142  | 1.78161  | 1.10462 | 0.0024037 | 0.0109041 | Up-regulated |
| NM_001323916 | FNIP2         | 57600  | 5.81788   | 6.7076   | 13.0432  | 14.2343  | 1.1043  | 3.00E-26  | 1.26E-24  | Up-regulated |
| NM_001134296 | AP3M2         | 10947  | 1.3526    | 0.369403 | 2.76453  | 3.69413  | 1.10406 | 0.0021634 | 0.0099482 | Up-regulated |
| NM_001167929 | ILIRAP        | 3556   | 7.83689   | 8.14591  | 16.1327  | 18.6863  | 1.10301 | 5.27E-24  | 1.92E-22  | Up-regulated |
| NM_001199622 | NCOA7         | 135112 | 0.386184  | 0.898318 | 1.93416  | 2.1502   | 1.10216 | 0.001366  | 0.0067251 | Up-regulated |
| NM_000089    | COL1A2        | 1278   | 0.410128  | 0.484743 | 1.15665  | 1.22819  | 1.10189 | 0.0003217 | 0.0018518 | Up-regulated |
| NR_049759    | IFITM3        | 10410  | 6.27263   | 8.73025  | 20.3011  | 19.1882  | 1.10173 | 0.0002223 | 0.0013243 | Up-regulated |
| NM_0020896   | OSBPL5        | 114879 | 15.0102   | 16.0043  | 34.3542  | 32.4859  | 1.10121 | 1.97E-47  | 1.64E-45  | Up-regulated |
| NM_001170752 | SRPX          | 8406   | 2.24507   | 3.68865  | 7.33118  | 7.74122  | 1.10095 | 0.0001129 | 0.0007193 | Up-regulated |
| NM_005734    | HIPK3         | 10114  | 1.46847   | 1.08495  | 3.35991  | 2.62449  | 1.10078 | 1.02E-06  | 9.42E-06  | Up-regulated |
| NM_203355    | MA2           | 4253   | 0.523109  | 0.806491 | 1.56205  | 2.52734  | 1.09951 | 0.0012458 | 0.0061989 | Up-regulated |
| NM_0000474   | TWIST1        | 7291   | 11.3217   | 12.9817  | 24.9417  | 27.0499  | 1.09712 | 1.22E-05  | 0.0005351 | Up-regulated |
| NM_212481    | ARID5A        | 10865  | 16.6753   | 15.2558  | 32.5355  | 36.7763  | 1.09649 | 1.10E-22  | 3.72E-21  | Up-regulated |
| NM_001146104 | nerase family | 83666  | 3.92322   | 1.22597  | 11.7097  | 14.7415  | 1.09183 | 0.0027661 | 0.0122881 | Up-regulated |
| NM_001193361 | EXD2          | 55218  | 0.704541  | 0.851515 | 1.66927  | 2.26698  | 1.09123 | 0.0001384 | 0.0008669 | Up-regulated |
| NM_0011111   | ADAR          | 103    | 11.2948   | 13.0549  | 26.0052  | 26.1522  | 1.08972 | 1.61E-38  | 1.01E-36  | Up-regulated |
| NM_001282857 | XRN1          | 54464  | 2.94496   | 3.30354  | 6.27987  | 7.24844  | 1.08855 | 2.93E-19  | 8.30E-18  | Up-regulated |
| NM_003254    | TIMP1         | 7076   | 242.813   | 229.648  | 503.663  | 498.388  | 1.08725 | 1.96E-110 | 4.81E-108 | Up-regulated |
| NR_103507    | SLC6A6        | 6533   | 1.46212   | 1.77515  | 4.68838  | 2.98741  | 1.08605 | 1.16E-05  | 9.03E-05  | Up-regulated |
| NM_001197222 | PDE4D         | 5144   | 0.216452  | 0.30729  | 0.816537 | 0.679837 | 1.0859  | 0.0009265 | 0.004782  | Up-regulated |
| NM_017661    | ZNF280D       | 54816  | 1.69274   | 1.05616  | 3.13801  | 3.52564  | 1.08573 | 3.48E-05  | 0.0002461 | Up-regulated |
| NM_001039477 | THEMIS2       | 9473   | 2.94935   | 3.51301  | 6.60076  | 11.1238  | 1.08484 | 0.000676  | 0.0036039 | Up-regulated |
| NM_018295    | TMEM140       | 55281  | 16.1665   | 14.6774  | 31.8771  | 34.4271  | 1.08437 | 2.03E-23  | 7.20E-22  | Up-regulated |
| NM_024625    | ZC3HAV1       | 56829  | 3.87875   | 3.5222   | 8.44606  | 7.84685  | 1.08191 | 3.71E-11  | 5.67E-10  | Up-regulated |
| NM_001135644 | DCTN4         | 51164  | 0.251543  | 0.488007 | 1.62608  | 1.04125  | 1.07742 | 0.0027185 | 0.0121108 | Up-regulated |
| NM_001130848 | PITPNM1       | 9600   | 1.97475   | 2.39194  | 4.88159  | 4.87259  | 1.07735 | 1.27E-08  | 1.49E-07  | Up-regulated |
| NM_001282667 | MICAL2        | 9645   | 0.276617  | 0.645669 | 2.12036  | 1.03894  | 1.07713 | 0.0024752 | 0.0111989 | Up-regulated |
| NM_001297654 | DDR1          | 780    | 15.8271   | 21.5365  | 59.1837  | 37.7433  | 1.07711 | 0.0003669 | 0.0020853 | Up-regulated |
| NM_001317783 | TSTA3         | 7264   | 6.67522   | 5.8498   | 11.3151  | 20.0851  | 1.07684 | 0.0001748 | 0.0010665 | Up-regulated |
| NM_001040217 | FAM63A        | 55793  | 1.23466   | 1.73306  | 5.40069  | 3.13109  | 1.07643 | 0.0011389 | 0.0057238 | Up-regulated |
| NR_134272    | OC10192974    | 1E+08  | 2.65293   | 1.89145  | 5.41339  | 5.36711  | 1.0744  | 1.92E-05  | 0.0001424 | Up-regulated |
| NM_001318134 | GAK           | 2580   | 2.71087   | 3.29827  | 7.38986  | 5.96871  | 1.07372 | 1.85E-08  | 2.13E-07  | Up-regulated |
| NM_001163149 | ETV1          | 2115   | 0.203116  | 0.285768 | 0.840416 | 0.67549  | 1.07175 | 0.0019374 | 0.0090463 | Up-regulated |
| NM_007286    | SYNPO         | 11346  | 0.563807  | 0.643239 | 1.57516  | 1.41866  | 1.07163 | 0.000135  | 0.0008473 | Up-regulated |
| NM_014293    | NPTXR         | 23467  | 4.99631   | 5.21193  | 11.0124  | 10.6445  | 1.07093 | 1.28E-28  | 5.89E-27  | Up-regulated |
| NM_005539    | INPP5A        | 3632   | 6.75255   | 6.10826  | 13.8542  | 13.7015  | 1.07045 | 2.69E-17  | 6.61E-16  | Up-regulated |
| NM_001162371 | LOC728392     | 728392 | 4.13279   | 5.44385  | 11.7466  | 10.3872  | 1.06966 | 7.55E-06  | 6.09E-05  | Up-regulated |
| NM_198833    | SERPINB8      | 5271   | 4.37981   | 4.24807  | 11.249   | 8.03128  | 1.06884 | 1.00E-07  | 1.06E-06  | Up-regulated |
| NM_005257    | GATA6         | 2627   | 2.28886   | 2.43513  | 5.08011  | 5.35067  | 1.0688  | 3.72E-09  | 4.63E-08  | Up-regulated |
| NM_002214    | ITGB8         | 3696   | 1.70437   | 1.64394  | 3.5578   | 3.62623  | 1.06793 | 2.98E-15  | 6.45E-14  | Up-regulated |
| NM_203331    | CD59          | 966    | 20.8112   | 20.3419  | 42.4508  | 43.5915  | 1.06535 | 2.63E-125 | 7.60E-123 | Up-regulated |
| NM_001104544 | TMEM255A      | 55026  | 14.878    | 16.2482  | 30.81    | 34.9352  | 1.06398 | 8.05E-27  | 3.46E-25  | Up-regulated |
| NM_003790    | TNFRSF25      | 8718   | 1.23226   | 0.882765 | 3.20761  | 3.19339  | 1.06326 | 0.0020833 | 0.009645  | Up-regulated |
| NM_001127222 | CACNA1A       | 773    | 0.189772  | 0.749313 | 1.66538  | 1.6138   | 1.06239 | 0.003048  | 0.0133409 | Up-regulated |
| NM_003512    | HIST1H2AC     | 8334   | 61.2377   | 63.9289  | 134.13   | 131.775  | 1.06131 | 5.80E-17  | 1.40E-15  | Up-regulated |
| NM_198332    | STAT2         | 6773   | 7.08378   | 8.52483  | 18.6689  | 14.8949  | 1.0611  | 1.78E-12  | 3.04E-11  | Up-regulated |
| NM_001105192 | TLE3          | 7090   | 2.94023   | 2.03891  | 6.16017  | 5.00774  | 1.06081 | 7.24E-07  | 6.86E-06  | Up-regulated |
| NM_001195803 | LDLR          | 3949   | 2.07405   | 1.80093  | 3.4372   | 5.746    | 1.05873 | 5.71E-05  | 0.0003863 | Up-regulated |
| NM_001282234 | PSMA6         | 5687   | 3.50165   | 3.6736   | 11.6758  | 7.61703  | 1.05857 | 0.0009306 | 0.0047989 | Up-regulated |
| NM_022748    | TNS3          | 64759  | 10.0903   | 9.60083  | 20.5155  | 20.568   | 1.05832 | 2.18E-66  | 2.76E-64  | Up-regulated |
| NM_001135776 | ZBTB43        | 23099  | 0.336482  | 0.433333 | 1.49619  | 0.823041 | 1.05792 | 0.0021184 | 0.0097747 | Up-regulated |
| NM_198463    | C3orf67       | 200844 | 5.43699   | 5.44417  | 11.3642  | 11.8806  | 1.05501 | 6.71E-13  | 1.19E-11  | Up-regulated |
| NM_001001479 | SLC35E4       | 339665 | 2.71168   | 3.06065  | 6.88591  | 6.00345  | 1.05429 | 8.82E-07  | 8.26E-06  | Up-regulated |
| NM_017457    | CYTH2         | 9266   | 15.4042   | 13.6081  | 32.3901  | 28.4378  | 1.05307 | 1.26E-25  | 5.05E-24  | Up-regulated |
| NM_001284382 | UBE2Q2        | 92912  | 2.23593   | 1.78097  | 5.20579  | 4.08535  | 1.0494  | 3.15E-05  | 0.0002241 | Up-regulated |
| NM_172211    | CSF1          | 1435   | 0.810333  | 0.12806  | 2.93223  | 2.20016  | 1.04797 | 0.0039003 | 0.0165643 | Up-regulated |
| NM_001042632 | SNX21         | 90203  | 1.19335   | 1.43341  | 2.80115  | 3.48459  | 1.04581 | 0.0001426 | 0.0008905 | Up-regulated |
| NM_145236    | B3GNT7        | 93010  | 1.02532   | 1.28012  | 2.74121  | 2.67065  | 1.0452  | 8.63E-05  | 0.0005623 | Up-regulated |
| NM_001282980 | TLE3          | 7090   | 0.311743  | 0.679263 | 1.84371  | 1.17081  | 1.04449 | 0.0026934 | 0.0120156 | Up-regulated |
| NM_001172712 | SP3           | 6670   | 0.429706  | 0.45244  | 0.876292 | 1.5261   | 1.0432  | 0.0015207 | 0.0073525 | Up-regulated |
| NM_004711    | SYNGR1        | 9145   | 5.50156   | 5.18959  | 11.1245  | 11.185   | 1.04296 | 9.63E-22  | 3.12E-20  | Up-regulated |
| NM_004419    | DUSP5         | 1847   | 7.95785   | 8.29449  | 16.4123  | 17.6879  | 1.04154 | 9.07E-17  | 2.16E-15  | Up-regulated |
| NM_021960    | MCL1          | 4170   | 57.3511   | 59.1217  | 121.234  | 117.92   | 1.04018 | 1.66E-138 | 5.87E-136 | Up-regulated |
| NM_001206796 | PKM           | 5315   | 0.43544   | 0.308252 | 1.01588  | 1.67195  | 1.03936 | 0.0040515 | 0.0170989 | Up-regulated |
| NM_001139498 | FGF13         | 2258   | 0.0710238 | 0.102442 | 0.497393 | 4.79459  | 1.0379  | 0.0017504 | 0.008301  | Up-regulated |

|              |                 |        |          |          |          |          |         |           |           |              |
|--------------|-----------------|--------|----------|----------|----------|----------|---------|-----------|-----------|--------------|
| NR_037149    | NME1-NME2       | 654364 | 0        | 0.618016 | 6.75634  | 4.54868  | 1.03745 | 0.0021637 | 0.0099482 | Up-regulated |
| NM_018935    | PCDHB15         | 56121  | 5.5931   | 5.27933  | 11.7191  | 11.1409  | 1.03671 | 1.13E-13  | 2.15E-12  | Up-regulated |
| NM_001127245 | LRRC8A          | 56262  | 0.905611 | 0.88825  | 2.26677  | 1.93895  | 1.03663 | 0.0001288 | 0.0008113 | Up-regulated |
| NM_134421    | HPCAL1          | 3241   | 5.47305  | 5.16058  | 11.0626  | 11.7464  | 1.03609 | 7.50E-09  | 9.02E-08  | Up-regulated |
| NM_201522    | KLC4            | 89953  | 0.807013 | 0.826122 | 2.23603  | 1.99553  | 1.03452 | 0.001071  | 0.0054236 | Up-regulated |
| NM_001122681 | SH3BP2          | 6452   | 1.22971  | 0.701397 | 2.21472  | 2.27172  | 1.03452 | 8.34E-05  | 0.0005451 | Up-regulated |
| NM_017554    | erases family r | 54625  | 10.8903  | 10.9837  | 21.9724  | 22.877   | 1.03424 | 1.50E-68  | 2.06E-66  | Up-regulated |
| NM_001083585 | RABEP1          | 9135   | 0.572923 | 0.474501 | 1.36176  | 1.1972   | 1.03373 | 0.0004022 | 0.0022669 | Up-regulated |
| NM_001104545 | TMEM255A        | 55026  | 2.01225  | 1.13401  | 3.80071  | 3.95012  | 1.03368 | 0.0004624 | 0.0025708 | Up-regulated |
| NM_002117    | HLA-C           | 3107   | 111.547  | 109.953  | 234.852  | 218.465  | 1.03324 | 1.72E-75  | 2.75E-73  | Up-regulated |
| NM_001098785 | FAM89B          | 23625  | 23.5304  | 23.7356  | 52.0689  | 45.9651  | 1.03257 | 5.04E-20  | 1.49E-18  | Up-regulated |
| NM_001321877 | HDAC9           | 9734   | 0.431734 | 0.261994 | 1.12152  | 0.735376 | 1.03248 | 0.0015167 | 0.0073381 | Up-regulated |
| NM_130435    | PTPRE           | 5791   | 1.1934   | 1.56282  | 3.16294  | 2.98129  | 1.0315  | 6.05E-06  | 4.99E-05  | Up-regulated |
| NM_001321436 | TMBIM1          | 64114  | 3.01344  | 1.80633  | 5.75564  | 5.63379  | 1.02957 | 0.0002104 | 0.0012623 | Up-regulated |
| NM_003141    | TRIM21          | 6737   | 18.9797  | 17.0463  | 38.1117  | 36.2693  | 1.02955 | 5.24E-23  | 1.82E-21  | Up-regulated |
| NM_138720    | HIST1H2BD       | 3017   | 9.33401  | 6.82042  | 16.603   | 21.7369  | 1.02847 | 0.0002808 | 0.0016375 | Up-regulated |
| NR_138463    | MTERF4          | 130916 | 1.84643  | 1.35551  | 3.48274  | 3.61386  | 1.0282  | 7.63E-06  | 6.15E-05  | Up-regulated |
| NM_000665    | nt blood group  | 43     | 1.24612  | 0.133723 | 3.62119  | 5.29478  | 1.02755 | 0.0042163 | 0.0176863 | Up-regulated |
| NM_001954    | DDR1            | 780    | 9.38068  | 16.7028  | 33.3604  | 32.537   | 1.02702 | 0.0009008 | 0.0046709 | Up-regulated |
| NM_002149    | HPCAL1          | 3241   | 226.987  | 213.325  | 457.209  | 438.629  | 1.02651 | 3.38E-105 | 7.68E-103 | Up-regulated |
| NM_001145160 | TPM4            | 7171   | 1.73907  | 2.09739  | 3.8795   | 5.03346  | 1.02504 | 0.0001284 | 0.0008091 | Up-regulated |
| NR_027635    | SPATA5L1        | 79029  | 0.515323 | 0.592614 | 2.59954  | 1.26424  | 1.02443 | 0.0045519 | 0.0188868 | Up-regulated |
| NR_110697    | SEMA3B          | 7869   | 0.865214 | 0.156829 | 4.53384  | 2.44136  | 1.02317 | 0.0042314 | 0.0177261 | Up-regulated |
| NM_152588    | TMTC2           | 160335 | 7.87494  | 7.66905  | 15.4882  | 16.2606  | 1.02224 | 3.69E-35  | 2.08E-33  | Up-regulated |
| NM_014037    | SLC6A16         | 28968  | 0.363083 | 0.582204 | 1.41383  | 1.56553  | 1.02173 | 0.0038561 | 0.016406  | Up-regulated |
| NM_001267046 | FRMD6           | 122786 | 8.20772  | 9.43557  | 17.6507  | 18.4789  | 1.01911 | 3.34E-24  | 1.24E-22  | Up-regulated |
| NM_001252406 | ZBTB7B          | 51043  | 0.445358 | 0.686669 | 1.19438  | 2.24792  | 1.018   | 0.0037346 | 0.0159598 | Up-regulated |
| NM_001190947 | TRAF1           | 7185   | 5.18779  | 5.05356  | 14.4576  | 8.30973  | 1.01474 | 2.33E-05  | 0.0001709 | Up-regulated |
| NM_001276290 | PRKAR1A         | 5573   | 7.0075   | 6.9086   | 14.7725  | 15.0704  | 1.0138  | 7.25E-07  | 6.87E-06  | Up-regulated |
| NM_001199241 | KYNU            | 8942   | 1.51216  | 0.415081 | 4.03989  | 3.80249  | 1.01373 | 0.0054906 | 0.0222311 | Up-regulated |
| NR_135641    | IFI4            | 10561  | 1.31391  | 0.761876 | 3.11266  | 3.21047  | 1.01243 | 0.0039912 | 0.0169055 | Up-regulated |
| NM_017654    | SAMD9           | 54809  | 4.81754  | 4.12474  | 9.38069  | 8.90672  | 1.01104 | 1.29E-18  | 3.46E-17  | Up-regulated |
| NM_001105556 | THEMIS2         | 9473   | 15.4869  | 14.4182  | 29.3352  | 31.38    | 1.01082 | 2.62E-27  | 1.15E-25  | Up-regulated |
| NM_001005377 | PLAUR           | 5329   | 2.35757  | 1.96744  | 4.54391  | 6.6561   | 1.0095  | 0.0017782 | 0.0083996 | Up-regulated |
| NM_203403    | LURAP1L         | 286343 | 2.69866  | 2.54382  | 5.84428  | 5.41137  | 1.00938 | 1.67E-06  | 1.50E-05  | Up-regulated |
| NM_020437    | ASPHD2          | 57168  | 4.04793  | 4.51572  | 9.14795  | 8.61251  | 1.00935 | 3.62E-11  | 5.52E-10  | Up-regulated |
| NR_028502    | MIR22HG         | 84981  | 11.9055  | 12.6657  | 24.4621  | 25.4695  | 1.00915 | 1.09E-24  | 4.18E-23  | Up-regulated |
| NM_152529    | GPR155          | 151556 | 0.140311 | 0.214832 | 0.386861 | 1.0654   | 1.0086  | 0.0057444 | 0.0230727 | Up-regulated |
| NM_001908    | CTSB            | 1508   | 533.937  | 518.569  | 1054.75  | 1056.28  | 1.00816 | 1.57E-267 | 1.11E-264 | Up-regulated |
| NM_006517    | SLC16A2         | 6567   | 0.389488 | 0.65745  | 1.58272  | 1.30626  | 1.00718 | 0.0030198 | 0.013237  | Up-regulated |
| NM_015063    | SLC8A2          | 6543   | 0.485421 | 0.669371 | 1.51487  | 1.3263   | 1.00563 | 0.000957  | 0.0049155 | Up-regulated |
| NM_018309    | TBC1D23         | 55773  | 0.700797 | 0.591864 | 1.25298  | 2.39804  | 1.00311 | 0.0035714 | 0.0153451 | Up-regulated |
| NM_001009813 | MEIS3           | 56917  | 6.56398  | 11.2067  | 18.4873  | 20.5398  | 1.00246 | 2.56E-05  | 0.000186  | Up-regulated |
| NM_001166168 | NEK6            | 10783  | 2.00232  | 1.23939  | 4.57359  | 3.45449  | 1.00176 | 0.0011512 | 0.0057762 | Up-regulated |
| NM_001307952 | HAPLN3          | 145864 | 3.31629  | 2.48674  | 9.04691  | 5.12407  | 1.0014  | 0.0009983 | 0.0051042 | Up-regulated |
| NM_175840    | SMOX            | 54498  | 2.01312  | 1.39387  | 4.47568  | 3.8314   | 1.00137 | 0.0010119 | 0.0051627 | Up-regulated |
| NM_058172    | ANTXR2          | 118429 | 1.73097  | 1.73797  | 3.65277  | 3.4752   | 1.0003  | 2.10E-12  | 3.56E-11  | Up-regulated |
| NM_012420    | IFIT5           | 24138  | 10.1915  | 9.77225  | 19.2587  | 20.979   | 1.00007 | 5.81E-27  | 2.51E-25  | Up-regulated |
| NR_073481    | ZNF689          | 115509 | 5.27009  | 3.93301  | 9.07655  | 10.2806  | 0.99996 | 1.47E-07  | 1.53E-06  | Up-regulated |
| NM_001242640 | BRCC3           | 79184  | 0.808437 | 1.23242  | 3.22475  | 2.17312  | 0.9986  | 0.0024766 | 0.0112001 | Up-regulated |
| NM_001195001 | PTPRU           | 10076  | 1.20717  | 0.801668 | 2.30061  | 2.24709  | 0.99813 | 0.0001671 | 0.0010247 | Up-regulated |
| NR_003189    | lidate)(SYS1-   | 767557 | 1.88956  | 1.99566  | 6.56203  | 3.97189  | 0.99725 | 0.0032663 | 0.0141741 | Up-regulated |
| NM_006307    | SRPX            | 8406   | 47.3676  | 47.8037  | 94.3549  | 95.3288  | 0.99482 | 1.93E-66  | 2.47E-64  | Up-regulated |
| NM_017631    | DDX60           | 55601  | 3.38297  | 3.72601  | 6.80203  | 7.65917  | 0.99423 | 4.80E-14  | 9.49E-13  | Up-regulated |
| NR_037148    | member C25(T    | 548645 | 1.88805  | 1.8905   | 4.19355  | 4.1106   | 0.9938  | 6.84E-05  | 0.0004558 | Up-regulated |
| NM_001184813 | CEACAM1         | 634    | 0.96398  | 1.56412  | 2.87434  | 3.21021  | 0.99345 | 0.0009145 | 0.004733  | Up-regulated |
| NM_001987    | ETV6            | 2120   | 3.47109  | 3.46527  | 6.97626  | 7.01291  | 0.99338 | 5.00E-18  | 1.29E-16  | Up-regulated |
| NM_001800    | CDKN2D          | 1032   | 17.7597  | 18.4948  | 37.0359  | 36.0157  | 0.99184 | 8.59E-18  | 2.19E-16  | Up-regulated |
| NM_198315    | VWA5A           | 4013   | 4.26677  | 4.25471  | 9.62227  | 8.45695  | 0.99005 | 2.25E-06  | 1.98E-05  | Up-regulated |
| NM_001317895 | erases family r | 84875  | 1.70865  | 2.67735  | 6.49658  | 3.88136  | 0.9896  | 0.0007965 | 0.0041788 | Up-regulated |
| NM_001322988 | KALRN           | 8997   | 0.209472 | 0.378035 | 0.680079 | 0.920225 | 0.98905 | 0.0036495 | 0.0156523 | Up-regulated |
| NM_004753    | DHRS3           | 9249   | 16.7621  | 16.6571  | 34.38    | 32.6046  | 0.98734 | 2.27E-20  | 6.88E-19  | Up-regulated |
| NM_017633    | FAM46A          | 55603  | 1.56731  | 1.32469  | 3.00396  | 3.06294  | 0.98726 | 6.07E-07  | 5.80E-06  | Up-regulated |
| NM_001300751 | LMBR1L          | 55716  | 0.927551 | 2.11069  | 3.52993  | 4.98583  | 0.98588 | 0.0042514 | 0.0178022 | Up-regulated |
| NM_001128221 | VGLL4           | 9686   | 7.80258  | 7.91502  | 14.9891  | 16.5583  | 0.98529 | 2.47E-18  | 6.51E-17  | Up-regulated |
| NM_032738    | FCRLA           | 84824  | 10.4522  | 11.4948  | 22.6271  | 21.4505  | 0.98469 | 3.76E-17  | 9.17E-16  | Up-regulated |
| NM_001042422 | SLC16A3         | 9123   | 1.1784   | 1.26995  | 2.72947  | 3.32655  | 0.98419 | 0.0019672 | 0.0091697 | Up-regulated |
| NM_001287000 | T6GALNAC        | 30815  | 6.98641  | 7.35048  | 14.3188  | 14.6334  | 0.98373 | 2.45E-13  | 4.54E-12  | Up-regulated |
| NM_004759    | MAPKAPK2        | 9261   | 2.33216  | 1.90146  | 4.74174  | 4.2492   | 0.98366 | 6.77E-06  | 5.50E-05  | Up-regulated |
| NM_001130834 | LDB2            | 9079   | 2.25423  | 2.36049  | 4.89507  | 4.92764  | 0.98294 | 8.59E-06  | 6.85E-05  | Up-regulated |
| NM_019885    | CYP26B1         | 56603  | 1.56113  | 1.67559  | 3.46409  | 3.29222  | 0.98257 | 1.19E-06  | 1.10E-05  | Up-regulated |
| NM_078626    | CDKN2C          | 1031   | 1.76034  | 1.72841  | 4.38195  | 4.71767  | 0.98223 | 0.0029794 | 0.0130869 | Up-regulated |
| NM_016009    | SH3GLB1         | 51100  | 11.094   | 10.8463  | 21.1554  | 22.2321  | 0.9806  | 3.49E-49  | 3.09E-47  | Up-regulated |
| NM_001291879 | TACC2           | 10579  | 1.44128  | 1.73797  | 3.51367  | 3.32343  | 0.97984 | 3.14E-05  | 0.0002237 | Up-regulated |
| NR_125367    | MYHAS           | 1E+08  | 1.01908  | 0.897657 | 2.04791  | 2.29686  | 0.97935 | 0.00035   | 0.0019993 | Up-regulated |
| NM_001144063 | OSBPL5          | 114879 | 0.613364 | 1.46848  | 2.45485  | 3.24259  | 0.97782 | 0.0042872 | 0.0179324 | Up-regulated |
| NM_001005744 | NUMB            | 8650   | 6.64598  | 7.01865  | 13.6302  | 13.5622  | 0.97513 | 1.90E-18  | 5.04E-17  | Up-regulated |
| NM_001005745 | NUMB            | 8650   | 8.50816  | 7.55848  | 15.4988  | 16.52    | 0.97506 | 2.69E-17  | 6.61E-16  | Up-regulated |
| NM_020160    | MEIS3           | 56917  | 3.27322  | 3.9028   | 7.5222   | 7.54376  | 0.97331 | 4.66E-06  | 3.91E-05  | Up-regulated |
| NR_045072    | CSRNP2          | 81566  | 2.25986  | 1.48439  | 4.20612  | 3.84273  | 0.97186 | 5.44E-05  | 0.0003707 | Up-regulated |
| NM_030756    | TCF7L2          | 6934   | 0.748619 | 0.865569 | 1.89785  | 1.81632  | 0.9705  | 0.0007219 | 0.0038291 | Up-regulated |
| NM_001142281 | ARCN1           | 372    | 1.47678  | 0.861183 | 3.04049  | 2.50673  | 0.96958 | 0.0015449 | 0.0074504 | Up-regulated |
| NM_001145313 | FSD1L           | 83856  | 0.216206 | 0.442854 | 0.740237 | 1.1267   | 0.96949 | 0.0055322 | 0.022371  | Up-regulated |
| NM_001851    | COL9A1          | 1297   | 4.26056  | 3.83834  | 8.59486  | 7.68214  | 0.96833 | 2.53E-10  | 3.60E-09  | Up-regulated |



|              |             |        |           |          |          |          |         |           |           |              |
|--------------|-------------|--------|-----------|----------|----------|----------|---------|-----------|-----------|--------------|
| NM_001282959 | CCAR1       | 55749  | 0.518168  | 0.169926 | 1.19932  | 1.18734  | 0.96822 | 0.0077218 | 0.0297759 | Up-regulated |
| NM_001033044 | GLUL        | 2752   | 23.284    | 19.6916  | 41.2177  | 43.2333  | 0.96709 | 1.13E-30  | 5.55E-29  | Up-regulated |
| NM_001143837 | NOX4        | 50507  | 0.303849  | 0.755313 | 1.39662  | 1.68608  | 0.96557 | 0.0062986 | 0.0249631 | Up-regulated |
| NM_001033053 | NLRP1       | 22861  | 0.792552  | 1.01464  | 2.33993  | 1.74757  | 0.96477 | 0.0005686 | 0.0030871 | Up-regulated |
| NM_001321732 | DDX41       | 51428  | 4.17378   | 2.78162  | 7.50407  | 7.2544   | 0.96458 | 4.10E-05  | 0.0002855 | Up-regulated |
| NM_001243194 | INPP5F      | 22876  | 0.278438  | 0.000486 | 2.03747  | 2.70256  | 0.96449 | 0.0039254 | 0.0166451 | Up-regulated |
| NM_015559    | SETBP1      | 26040  | 3.04265   | 2.87091  | 6.00132  | 5.64687  | 0.96392 | 3.85E-21  | 1.21E-19  | Up-regulated |
| NM_002534    | OAS1        | 4938   | 17.9655   | 17.6158  | 32.466   | 38.2794  | 0.96386 | 1.63E-13  | 3.07E-12  | Up-regulated |
| NM_181501    | ITGA1       | 3672   | 5.69936   | 6.05976  | 11.1792  | 12.0028  | 0.96373 | 3.53E-19  | 9.88E-18  | Up-regulated |
| NM_014770    | AGAP2       | 116986 | 1.12541   | 1.38704  | 2.98549  | 2.42178  | 0.96292 | 9.08E-05  | 0.0005885 | Up-regulated |
| NM_004223    | UBE2L6      | 9246   | 68.8853   | 65.1377  | 130.109  | 131.314  | 0.96246 | 1.89E-47  | 1.59E-45  | Up-regulated |
| NM_145902    | HMGA1       | 3159   | 12.4752   | 13.5435  | 25.531   | 25.7027  | 0.96157 | 2.04E-18  | 5.39E-17  | Up-regulated |
| NM_021214    | ABHD17C     | 58489  | 16.2498   | 15.6089  | 31.849   | 30.5781  | 0.96122 | 9.01E-26  | 3.66E-24  | Up-regulated |
| NM_001278500 | ADORA2A     | 135    | 0.677457  | 0.375473 | 1.77609  | 1.58016  | 0.96116 | 0.0076119 | 0.0294473 | Up-regulated |
| NM_000094    | COL7A1      | 1294   | 5.69187   | 6.66573  | 12.4371  | 11.8335  | 0.96081 | 1.84E-22  | 6.12E-21  | Up-regulated |
| NR_135504    | MAN2A2      | 4122   | 0.381669  | 1.55648  | 3.72605  | 2.31436  | 0.96072 | 0.0075114 | 0.0290881 | Up-regulated |
| NM_178232    | HAPLN3      | 145864 | 19.0712   | 21.1403  | 38.9209  | 40.0193  | 0.96052 | 6.07E-23  | 2.09E-21  | Up-regulated |
| NM_031286    | SH3BGRL3    | 83442  | 304.043   | 287.518  | 573.224  | 575.222  | 0.96045 | 5.92E-109 | 1.41E-106 | Up-regulated |
| NM_001329429 | TP53INP2    | 58476  | 5.28138   | 3.71695  | 10.6062  | 8.07446  | 0.95954 | 6.81E-06  | 5.53E-05  | Up-regulated |
| NM_024847    | TMC7        | 79905  | 0.958039  | 1.2264   | 2.11216  | 2.76739  | 0.95937 | 0.0004953 | 0.0027283 | Up-regulated |
| NM_020729    | ODF2L       | 57489  | 2.0458    | 1.27944  | 3.41767  | 3.84453  | 0.95672 | 0.0002911 | 0.0016914 | Up-regulated |
| NM_052840    | CELF6       | 60677  | 2.43909   | 2.89628  | 5.36453  | 5.51271  | 0.9557  | 9.52E-07  | 8.85E-06  | Up-regulated |
| NR_023360    | CHRAC1      | 54108  | 0.791968  | 0.726801 | 1.99714  | 1.95587  | 0.95414 | 0.00466   | 0.0192683 | Up-regulated |
| NM_001134492 | HS2ST1      | 9653   | 4.761     | 3.7471   | 9.70981  | 8.40861  | 0.95323 | 0.0001048 | 0.0006727 | Up-regulated |
| NM_001427    | EN2         | 2020   | 8.05612   | 7.99365  | 15.9984  | 15.3872  | 0.95302 | 4.97E-20  | 1.48E-18  | Up-regulated |
| NM_058175    | COL6A2      | 1292   | 1.58195   | 1.30365  | 3.17637  | 3.00099  | 0.95259 | 0.0001579 | 0.0009745 | Up-regulated |
| NM_001674    | ATF3        | 467    | 5.46859   | 6.39645  | 14.5452  | 10.1944  | 0.9525  | 2.55E-05  | 0.0001856 | Up-regulated |
| NM_001288764 | DMPK        | 1760   | 0.773266  | 0.898107 | 2.01238  | 1.9726   | 0.95102 | 0.0025729 | 0.0115592 | Up-regulated |
| NM_001297775 | METTL15     | 196074 | 0.308987  | 0.280359 | 0.688644 | 1.21806  | 0.94989 | 0.0084568 | 0.0321688 | Up-regulated |
| NM_001202476 | UBE2E1      | 7324   | 2.07124   | 0.781168 | 3.28614  | 6.68747  | 0.94688 | 0.0093686 | 0.0350236 | Up-regulated |
| NM_015283    | DPY19L1     | 23333  | 12.0925   | 12.7507  | 24.0827  | 23.9189  | 0.94665 | 5.29E-41  | 3.65E-39  | Up-regulated |
| NM_001039550 | member B2(I | 3300   | 55.7888   | 50.1978  | 104.242  | 100.504  | 0.94655 | 4.08E-39  | 2.62E-37  | Up-regulated |
| NM_001300973 | ANKRD42     | 338699 | 0.522285  | 0.728372 | 1.58612  | 1.83205  | 0.9464  | 0.0063389 | 0.0251126 | Up-regulated |
| NM_001204459 | TNFRSF19    | 55504  | 0.521736  | 0.762138 | 1.41639  | 1.65763  | 0.94618 | 0.0029549 | 0.0130001 | Up-regulated |
| NM_004995    | MMP14       | 4323   | 363.496   | 367.384  | 726.514  | 678.93   | 0.94558 | 5.05E-105 | 1.13E-102 | Up-regulated |
| NM_001256423 | ARHGAP19    | 84986  | 0.82576   | 0.301126 | 2.24963  | 1.2162   | 0.9451  | 0.0086421 | 0.0327196 | Up-regulated |
| NM_015260    | SIN3B       | 23309  | 2.77482   | 2.39103  | 5.3964   | 4.89237  | 0.94509 | 1.03E-08  | 1.21E-07  | Up-regulated |
| NM_080730    | IFFO1       | 25900  | 0.494698  | 0.871729 | 2.13444  | 1.68671  | 0.94362 | 0.0071926 | 0.0280125 | Up-regulated |
| NM_001204817 | ZNF587      | 84914  | 1.24606   | 0.564149 | 1.65464  | 2.96268  | 0.94347 | 0.0049466 | 0.0202996 | Up-regulated |
| NM_021194    | SLC30A1     | 7779   | 5.37683   | 5.02586  | 9.67788  | 11.2969  | 0.94288 | 8.17E-07  | 7.68E-06  | Up-regulated |
| NR_138466    | MTERFA      | 130916 | 0.283061  | 0.521686 | 0.749365 | 1.97713  | 0.94265 | 0.009554  | 0.0355913 | Up-regulated |
| NM_001171629 | VEGFA       | 7422   | 0.637858  | 0.808261 | 1.31869  | 2.63338  | 0.94257 | 0.0068119 | 0.0267041 | Up-regulated |
| NM_001031804 | MAF         | 4094   | 0.960252  | 1.01449  | 2.10849  | 1.93455  | 0.94251 | 8.08E-06  | 6.47E-05  | Up-regulated |
| NM_001261412 | DCTN2       | 10540  | 3.86518   | 3.27166  | 7.09594  | 7.53022  | 0.94211 | 1.38E-05  | 0.0001051 | Up-regulated |
| NM_019891    | ERO1B       | 56605  | 2.02788   | 2.51151  | 4.34549  | 4.76356  | 0.94193 | 3.95E-07  | 3.87E-06  | Up-regulated |
| NM_001167595 | AMACR       | 23600  | 0.518954  | 0.921457 | 2.06782  | 1.91135  | 0.94138 | 0.0070265 | 0.0274549 | Up-regulated |
| NM_001286115 | THEMIS2     | 9473   | 1.77458   | 0.53041  | 4.86294  | 2.98132  | 0.94087 | 0.0097588 | 0.0362271 | Up-regulated |
| NM_001005498 | RHBDP2      | 79651  | 15.8925   | 17.6991  | 33.7454  | 31.1265  | 0.93965 | 1.82E-24  | 6.83E-23  | Up-regulated |
| NM_001316321 | CCDC57      | 284001 | 1.95308   | 2.21061  | 4.16076  | 4.02777  | 0.93852 | 6.05E-10  | 8.19E-09  | Up-regulated |
| NM_002842    | PTPRH       | 5794   | 6.79417   | 6.45428  | 13.0071  | 12.659   | 0.93832 | 1.97E-18  | 5.24E-17  | Up-regulated |
| NM_181303    | NLGN3       | 54413  | 0.638437  | 0.939088 | 3.0992   | 1.32115  | 0.9382  | 0.0077754 | 0.0299406 | Up-regulated |
| NM_153347    | TMEM86A     | 144110 | 7.55011   | 7.51792  | 14.4212  | 14.6998  | 0.93696 | 4.27E-20  | 1.28E-18  | Up-regulated |
| NM_148919    | PSMB8       | 5696   | 72.9808   | 69.695   | 136.005  | 137.451  | 0.9367  | 1.55E-42  | 1.12E-40  | Up-regulated |
| NM_080679    | COL11A2     | 1302   | 5.54795   | 6.39673  | 11.4911  | 11.5967  | 0.93619 | 5.74E-19  | 1.58E-17  | Up-regulated |
| NM_020307    | CCNL1       | 57018  | 17.8172   | 19.9231  | 34.0874  | 38.7547  | 0.93431 | 3.93E-19  | 1.09E-17  | Up-regulated |
| NM_003530    | HIST1H3D    | 8351   | 3.2208    | 2.95972  | 8.41065  | 6.70334  | 0.9335  | 0.0045553 | 0.0188965 | Up-regulated |
| NM_001286971 | CENPP       | 401541 | 0.487281  | 0.823121 | 1.80026  | 1.82271  | 0.9329  | 0.0080988 | 0.0310106 | Up-regulated |
| NM_006238    | PPARD       | 5467   | 13.86     | 14.6743  | 28.4169  | 26.3101  | 0.93256 | 4.01E-28  | 1.81E-26  | Up-regulated |
| NM_000611    | CD59        | 966    | 34.5575   | 34.6817  | 65.5103  | 66.3109  | 0.93212 | 3.01E-153 | 1.34E-150 | Up-regulated |
| NM_001282100 | YAP1        | 10413  | 2.01006   | 2.91609  | 4.49992  | 5.61128  | 0.93193 | 3.04E-05  | 0.0002174 | Up-regulated |
| NM_012417    | PITPNC1     | 26207  | 0.527209  | 0.385023 | 1.22451  | 0.928453 | 0.93156 | 0.0032655 | 0.014174  | Up-regulated |
| NM_183004    | EIF5        | 1983   | 0.105711  | 0.381127 | 0.817295 | 0.9843   | 0.93111 | 0.0107867 | 0.0394983 | Up-regulated |
| NM_001130144 | LTBP3       | 4054   | 8.46784   | 9.82359  | 17.8308  | 17.3564  | 0.93021 | 9.44E-20  | 2.75E-18  | Up-regulated |
| NM_001001342 | BLOC1S2     | 282991 | 0.537057  | 0.626187 | 1.5771   | 1.5392   | 0.93016 | 0.007085  | 0.0276495 | Up-regulated |
| NM_014143    | CD27A       | 29126  | 0.581786  | 0.351074 | 1.14042  | 1.42431  | 0.92935 | 0.0079997 | 0.0306745 | Up-regulated |
| NM_004843    | IL27RA      | 9466   | 20.4792   | 20.952   | 39.9647  | 39.1481  | 0.92931 | 1.03E-36  | 6.14E-35  | Up-regulated |
| NM_018177    | N4BP2       | 55728  | 0.392604  | 0.566864 | 0.855765 | 1.35857  | 0.92923 | 0.0025253 | 0.0113774 | Up-regulated |
| NM_004099    | STOM        | 2040   | 76.3602   | 74.8688  | 144.252  | 143.026  | 0.92889 | 2.97E-133 | 9.94E-131 | Up-regulated |
| NM_016639    | TNFRSF12A   | 51330  | 90.9302   | 94.1591  | 178.056  | 174.399  | 0.92839 | 1.70E-48  | 1.47E-46  | Up-regulated |
| NM_015474    | SAMHD1      | 25939  | 11.9593   | 13.1847  | 23.56    | 24.6645  | 0.92822 | 3.80E-22  | 1.25E-20  | Up-regulated |
| NM_004979    | KCND1       | 3750   | 0.812674  | 0.78447  | 1.75237  | 1.66803  | 0.92483 | 0.0006353 | 0.0034128 | Up-regulated |
| NM_001195192 | EFCAB13     | 124989 | 0.790623  | 0.635302 | 1.98563  | 1.46675  | 0.92347 | 0.0043985 | 0.0183295 | Up-regulated |
| NM_001243374 | CLCN3       | 1182   | 3.18588   | 3.43437  | 6.59036  | 6.1855   | 0.92345 | 6.93E-13  | 1.23E-11  | Up-regulated |
| NM_182931    | KMT2E       | 55904  | 7.8472    | 10.0935  | 17.5651  | 16.9903  | 0.922   | 1.21E-13  | 2.30E-12  | Up-regulated |
| NM_001174120 | ZFYVE27     | 118813 | 0.0267506 | 0.611547 | 2.97692  | 3.26257  | 0.92148 | 0.006967  | 0.0272373 | Up-regulated |
| NM_001253846 | GMD5        | 2762   | 4.96916   | 4.11035  | 7.86583  | 11.8502  | 0.9211  | 0.0010291 | 0.0052352 | Up-regulated |
| NM_012183    | FOXO3       | 27022  | 29.4672   | 28.6378  | 57.4703  | 52.9566  | 0.92014 | 1.92E-29  | 9.02E-28  | Up-regulated |
| NM_030912    | TRIM8       | 81603  | 21.0722   | 20.1454  | 40.345   | 37.9141  | 0.9192  | 5.00E-31  | 2.49E-29  | Up-regulated |
| NM_001317894 | TOR1B       | 27348  | 1.56261   | 0.535934 | 3.72587  | 3.27976  | 0.91918 | 0.0116332 | 0.0420497 | Up-regulated |
| NM_002801    | PSMB10      | 5699   | 29.8194   | 29.085   | 54.9831  | 57.7068  | 0.91797 | 1.84E-15  | 4.06E-14  | Up-regulated |
| NM_174919    | ARHGAP27    | 201176 | 1.24096   | 1.00101  | 3.65377  | 2.74144  | 0.91705 | 0.0099952 | 0.0369897 | Up-regulated |
| NM_139157    | ST5         | 6764   | 2.61921   | 6.50966  | 12.1163  | 16.6325  | 0.9167  | 0.0115156 | 0.0417057 | Up-regulated |
| NM_014831    | TRANK1      | 9881   | 2.93198   | 1.57204  | 4.84249  | 4.44355  | 0.91666 | 0.0001621 | 0.0009967 | Up-regulated |
| NM_138717    | PPT2        | 9374   | 13.1856   | 11.8682  | 23.8385  | 24.2359  | 0.91596 | 3.06E-13  | 5.60E-12  | Up-regulated |

|              |              |        |          |          |          |          |         |           |           |              |
|--------------|--------------|--------|----------|----------|----------|----------|---------|-----------|-----------|--------------|
| NM_198281    | GPRIN3       | 285513 | 2.17796  | 2.25231  | 4.06989  | 4.50519  | 0.91423 | 1.53E-09  | 1.99E-08  | Up-regulated |
| NM_001318199 | SNX10        | 29887  | 10.0463  | 5.70904  | 13.3589  | 19.8443  | 0.9138  | 0.0005639 | 0.0030647 | Up-regulated |
| NM_012259    | HEY2         | 23493  | 0.956696 | 1.41696  | 2.70288  | 2.79205  | 0.9138  | 0.0032435 | 0.0140818 | Up-regulated |
| NM_001322991 | KALRN        | 8997   | 0.643521 | 0.504226 | 1.12332  | 1.3996   | 0.91375 | 0.0016239 | 0.0077764 | Up-regulated |
| NM_001145909 | TANC1        | 85461  | 0.207401 | 0.733434 | 1.19983  | 1.61334  | 0.91261 | 0.0113719 | 0.041293  | Up-regulated |
| NM_001329226 | LRP10        | 26020  | 0.43363  | 1.18694  | 1.78306  | 2.64353  | 0.91199 | 0.0097747 | 0.036272  | Up-regulated |
| NM_005194    | CEBPB        | 1051   | 78.3807  | 76.2715  | 147.978  | 142.57   | 0.91147 | 4.98E-76  | 8.00E-74  | Up-regulated |
| NM_013993    | DDR1         | 780    | 25.2894  | 18.7649  | 38.1532  | 46.8479  | 0.91086 | 1.75E-09  | 2.25E-08  | Up-regulated |
| NM_018984    | SSH1         | 54434  | 23.5595  | 24.9686  | 46.3994  | 44.7563  | 0.91047 | 1.07E-72  | 1.56E-70  | Up-regulated |
| NM_078474    | TM2D3        | 80213  | 3.79482  | 5.74147  | 9.39325  | 10.8324  | 0.90928 | 0.0008946 | 0.0046435 | Up-regulated |
| NM_001040429 | PCDH17       | 27253  | 0.116632 | 0.225131 | 0.558815 | 0.461848 | 0.90865 | 0.0117687 | 0.0424434 | Up-regulated |
| NM_007315    | STAT1        | 6772   | 62.1816  | 62.6301  | 113.994  | 119.835  | 0.90801 | 2.09E-97  | 4.20E-95  | Up-regulated |
| NM_005726    | TSMF         | 10102  | 22.799   | 22.1827  | 42.011   | 42.7076  | 0.9076  | 2.11E-28  | 9.69E-27  | Up-regulated |
| NM_001145265 | SLC35C1      | 55343  | 3.05564  | 5.14864  | 9.44373  | 7.56079  | 0.90701 | 0.0003656 | 0.00208   | Up-regulated |
| NM_004389    | CTNNA2       | 1496   | 0.639397 | 0.630884 | 1.42141  | 1.46332  | 0.90676 | 0.0033664 | 0.014559  | Up-regulated |
| NM_001387    | DPYSL3       | 1809   | 1.15976  | 1.51234  | 2.77862  | 2.64253  | 0.90622 | 9.72E-05  | 0.0006276 | Up-regulated |
| NM_145040    | PRKCDDBP     | 112464 | 195.221  | 180.355  | 361.647  | 342.145  | 0.90604 | 3.58E-48  | 3.08E-46  | Up-regulated |
| NM_006417    | IFI44        | 10561  | 30.3445  | 26.901   | 53.2203  | 54.7837  | 0.90599 | 1.00E-21  | 3.24E-20  | Up-regulated |
| NM_030911    | CDADC1       | 81602  | 0.493777 | 1.17887  | 1.81997  | 2.83672  | 0.90589 | 0.0107441 | 0.0393799 | Up-regulated |
| NM_014001    | GGA3         | 23163  | 1.3872   | 1.06942  | 2.51718  | 2.6252   | 0.9056  | 0.0006106 | 0.0032904 | Up-regulated |
| NM_015548    | DST          | 667    | 3.93233  | 5.41515  | 9.53659  | 8.39826  | 0.90532 | 8.27E-10  | 1.11E-08  | Up-regulated |
| NM_001858    | COL19A1      | 1310   | 6.59621  | 7.07542  | 12.5666  | 13.0901  | 0.90356 | 8.93E-33  | 4.73E-31  | Up-regulated |
| NM_016546    | C1RL         | 51279  | 8.52936  | 10.2177  | 18.838   | 16.8344  | 0.90308 | 9.83E-12  | 1.57E-10  | Up-regulated |
| NM_001284245 | SIPAIL1      | 26037  | 1.9018   | 1.96276  | 3.97782  | 3.446    | 0.90252 | 4.66E-09  | 5.76E-08  | Up-regulated |
| NM_004416    | DTX1         | 1840   | 0.700284 | 0.579519 | 1.47664  | 1.5726   | 0.9015  | 0.0060871 | 0.0242356 | Up-regulated |
| NM_003528    | HIST2H2BE    | 8349   | 6.29619  | 5.80259  | 11.0311  | 12.2948  | 0.90032 | 5.13E-08  | 5.61E-07  | Up-regulated |
| NM_001135732 | TOM1         | 10043  | 4.1368   | 4.38488  | 8.08564  | 8.46782  | 0.90011 | 5.64E-07  | 5.42E-06  | Up-regulated |
| NM_000396    | CTSK         | 1513   | 2.20794  | 2.64436  | 4.99002  | 5.2319   | 0.89931 | 0.0010296 | 0.0052361 | Up-regulated |
| NM_014746    | RNF144A      | 9781   | 11.1341  | 10.7697  | 20.5061  | 20.4122  | 0.89918 | 5.73E-41  | 3.94E-39  | Up-regulated |
| NM_005929    | MELTF        | 4241   | 0.424798 | 0.432621 | 0.942306 | 1.23751  | 0.8989  | 0.0091912 | 0.0344618 | Up-regulated |
| NM_032098    | PCDHGB4      | 8641   | 1.51073  | 2.43252  | 4.79456  | 3.89841  | 0.8986  | 0.0026891 | 0.0120019 | Up-regulated |
| NM_023072    | ZSWIM4       | 65249  | 7.54246  | 8.12902  | 15.3091  | 14.1457  | 0.8976  | 5.49E-18  | 1.42E-16  | Up-regulated |
| NM_004126    | GNG11        | 2791   | 94.1833  | 75.2616  | 159.082  | 160.054  | 0.89659 | 8.61E-15  | 1.80E-13  | Up-regulated |
| NM_181711    | GRASP        | 160622 | 20.6229  | 21.499   | 38.7176  | 39.9719  | 0.89449 | 1.62E-23  | 5.78E-22  | Up-regulated |
| NM_020748    | INTS2        | 57508  | 0.130303 | 0.000183 | 0.767284 | 1.2746   | 0.89446 | 0.0065537 | 0.025851  | Up-regulated |
| NM_001330488 | PHC2         | 1912   | 17.3612  | 18.1251  | 33.6289  | 32.407   | 0.89296 | 1.70E-37  | 1.04E-35  | Up-regulated |
| NM_014475    | DHDH         | 27294  | 1.8909   | 1.37924  | 4.57174  | 4.2232   | 0.89263 | 0.0115902 | 0.041926  | Up-regulated |
| NM_181866    | ACOT7        | 11332  | 7.19592  | 7.87347  | 12.2706  | 18.1678  | 0.8926  | 0.0002509 | 0.001478  | Up-regulated |
| NM_001135806 | SYT1         | 6857   | 1.06723  | 0.651225 | 2.69308  | 1.49346  | 0.89254 | 0.0079875 | 0.0306336 | Up-regulated |
| NM_020972    | ZFYVE28      | 57732  | 2.90629  | 3.25891  | 5.77062  | 6.01377  | 0.88961 | 3.84E-08  | 4.26E-07  | Up-regulated |
| NM_001033568 | RHOT1        | 55288  | 0.724509 | 0.743849 | 1.47468  | 1.93097  | 0.88914 | 0.005969  | 0.0238399 | Up-regulated |
| NM_002206    | ITGA7        | 3679   | 2.38789  | 2.39003  | 4.19289  | 5.09142  | 0.888   | 6.01E-06  | 4.96E-05  | Up-regulated |
| NM_004048    | B2M          | 567    | 1264.28  | 1204.88  | 2237.56  | 2317.79  | 0.88786 | 3.48E-108 | 8.20E-106 | Up-regulated |
| NM_001318728 | ZNF532       | 55205  | 4.456    | 5.56859  | 11.1752  | 8.14355  | 0.88745 | 1.23E-06  | 1.13E-05  | Up-regulated |
| NM_138821    | PAM          | 5066   | 3.53237  | 2.67452  | 5.1684   | 7.01762  | 0.88685 | 3.67E-05  | 0.0002578 | Up-regulated |
| NR_119376    | FER1L4       | 80307  | 0.962396 | 1.26771  | 2.24742  | 2.17096  | 0.88601 | 8.08E-05  | 0.0005299 | Up-regulated |
| NM_032199    | ARID5B       | 84159  | 0.574197 | 0.658116 | 1.27991  | 1.20856  | 0.88541 | 0.0003591 | 0.0020461 | Up-regulated |
| NM_031448    | C19orf12     | 83636  | 6.20925  | 5.37323  | 11.2427  | 10.4689  | 0.88525 | 8.60E-13  | 1.51E-11  | Up-regulated |
| NM_014806    | RUSC2        | 9853   | 6.50482  | 6.89939  | 12.6211  | 12.2781  | 0.8852  | 2.80E-22  | 9.27E-21  | Up-regulated |
| NR_027406    | OC10012903   | 1E+08  | 7.7585   | 6.88589  | 14.0429  | 13.215   | 0.88513 | 4.71E-19  | 1.31E-17  | Up-regulated |
| NM_001005914 | SEMA3B       | 7869   | 11.4243  | 14.4491  | 25.9141  | 22.9025  | 0.88508 | 4.00E-10  | 5.56E-09  | Up-regulated |
| NM_001122    | PLIN2        | 123    | 32.3347  | 33.8534  | 61.5305  | 60.8188  | 0.88357 | 4.58E-36  | 2.66E-34  | Up-regulated |
| NM_030963    | RNF146       | 81847  | 1.02011  | 0.667719 | 2.59729  | 1.78337  | 0.88305 | 0.0118063 | 0.0425628 | Up-regulated |
| NR_073130    | CDH19        | 28513  | 1.02805  | 1.23252  | 2.1126   | 2.34612  | 0.88286 | 6.89E-05  | 0.0004584 | Up-regulated |
| NM_175839    | SMOX         | 54498  | 10.7496  | 11.2768  | 19.7821  | 21.3391  | 0.8806  | 2.23E-13  | 4.14E-12  | Up-regulated |
| NM_003006    | SELPLG       | 6404   | 2.7689   | 3.36134  | 6.34481  | 5.68767  | 0.88026 | 6.34E-05  | 0.0004249 | Up-regulated |
| NM_144778    | MBNL2        | 10150  | 0.799411 | 0.766582 | 1.99541  | 1.39971  | 0.87944 | 0.0033154 | 0.0143614 | Up-regulated |
| NM_001282958 | EIF4E2       | 9470   | 1.39055  | 0.737287 | 1.87091  | 3.44843  | 0.87943 | 0.0106143 | 0.0389565 | Up-regulated |
| NM_001322033 | ACTN4        | 81     | 2.97966  | 2.53738  | 5.04381  | 5.50951  | 0.87912 | 1.71E-06  | 1.53E-05  | Up-regulated |
| NM_001251825 | SP1          | 6667   | 0.251763 | 0.215755 | 0.647902 | 0.499452 | 0.8791  | 0.0103153 | 0.0380343 | Up-regulated |
| NM_006818    | MLLT11       | 10962  | 91.8511  | 85.2303  | 157.651  | 168.072  | 0.87898 | 9.33E-47  | 7.62E-45  | Up-regulated |
| NM_001009933 | DNASE1L1     | 1774   | 1.12717  | 1.35188  | 2.90748  | 2.44235  | 0.8776  | 0.0031163 | 0.0135845 | Up-regulated |
| NM_018934    | PCDHB14      | 56122  | 2.10708  | 2.31119  | 4.1641   | 4.32247  | 0.87715 | 4.88E-06  | 4.07E-05  | Up-regulated |
| NM_014656    | KIAA0040     | 9674   | 1.06191  | 0.891406 | 2.50967  | 1.66804  | 0.87671 | 0.0030113 | 0.0132085 | Up-regulated |
| NR_038190    | AGER         | 177    | 1.56321  | 1.09779  | 4.12344  | 2.66164  | 0.87648 | 0.0119163 | 0.042911  | Up-regulated |
| NM_001306188 | MOSPD1       | 56180  | 6.44283  | 7.28244  | 12.0205  | 13.9687  | 0.87638 | 1.53E-07  | 1.59E-06  | Up-regulated |
| NM_001321968 | ATAD1        | 84896  | 0.393069 | 0.301359 | 1.10912  | 0.754479 | 0.87579 | 0.0137901 | 0.0485536 | Up-regulated |
| NR_028504    | MIR22HG      | 84981  | 2.36257  | 3.45902  | 5.93946  | 6.65307  | 0.87573 | 0.0038266 | 0.0162983 | Up-regulated |
| NM_002468    | MYD88        | 4615   | 18.5122  | 18.2046  | 32.5184  | 35.1713  | 0.87559 | 1.33E-25  | 5.36E-24  | Up-regulated |
| NM_001347425 | M_00134742   | NA     | 0.182985 | 0.916231 | 6.98726  | 3.55918  | 0.87559 | 0.0095067 | 0.0354499 | Up-regulated |
| NM_000785    | CYP27B1      | 1594   | 1.58302  | 1.8525   | 3.84602  | 3.26507  | 0.87508 | 0.0016267 | 0.0077858 | Up-regulated |
| NM_001271561 | PRNP         | 5621   | 34.2226  | 29.9011  | 60.2504  | 57.7991  | 0.87477 | 1.63E-25  | 6.48E-24  | Up-regulated |
| NM_001136562 | AKAP2        | 11217  | 3.42827  | 3.55804  | 6.91061  | 6.08611  | 0.87394 | 3.81E-12  | 6.29E-11  | Up-regulated |
| NM_001559    | IL12RB2      | 3595   | 3.79124  | 4.18031  | 7.31109  | 7.60492  | 0.87275 | 1.22E-09  | 1.60E-08  | Up-regulated |
| NM_003873    | NRP1         | 8829   | 0.540458 | 0.263459 | 0.844552 | 1.25408  | 0.87243 | 0.013284  | 0.0470438 | Up-regulated |
| NM_001256647 | NR1H2        | 7376   | 2.30266  | 3.02391  | 4.00974  | 8.7831   | 0.87168 | 0.0101263 | 0.0374387 | Up-regulated |
| NR_002771    | DLEU2L       | 79469  | 4.12014  | 3.95642  | 7.48114  | 8.45588  | 0.87158 | 0.0001699 | 0.0010394 | Up-regulated |
| NR_134470    | ILIRAP       | 3556   | 2.8221   | 2.62828  | 5.62974  | 5.19     | 0.87148 | 0.00032   | 0.001844  | Up-regulated |
| NM_005817    | PLIN3        | 10226  | 57.3336  | 53.8635  | 103.745  | 99.5844  | 0.87065 | 4.98E-49  | 4.36E-47  | Up-regulated |
| NM_001314077 | alpha)(PROS1 | 5627   | 12.4653  | 13.6115  | 21.8268  | 26.5088  | 0.86996 | 1.31E-12  | 2.27E-11  | Up-regulated |
| NM_001329672 | ARRDC3       | 57561  | 0.487395 | 0.464241 | 0.846498 | 1.67372  | 0.86989 | 0.0141841 | 0.0497759 | Up-regulated |
| NM_001734    | C1S          | 716    | 1.39906  | 0.703771 | 2.42334  | 2.70819  | 0.86907 | 0.0110038 | 0.0401599 | Up-regulated |
| NM_017414    | USP18        | 11274  | 22.3974  | 20.5618  | 36.7869  | 42.5888  | 0.86846 | 2.52E-14  | 5.10E-13  | Up-regulated |
| NM_015490    | SEC31B       | 25956  | 0.819086 | 1.05678  | 1.79614  | 2.06131  | 0.8675  | 0.0016395 | 0.0078353 | Up-regulated |

|              |                |        |          |          |          |          |         |           |           |              |
|--------------|----------------|--------|----------|----------|----------|----------|---------|-----------|-----------|--------------|
| NM_002291    | LAMB1          | 3912   | 49.8032  | 51.212   | 91.3135  | 92.2851  | 0.86528 | 4.86E-122 | 1.35E-119 | Up-regulated |
| NM_003246    | THBS1          | 7057   | 22.7963  | 25.2071  | 43.1773  | 44.228   | 0.86326 | 3.95E-43  | 2.93E-41  | Up-regulated |
| NM_152891    | PRSS33         | 260429 | 1.40839  | 1.13093  | 2.65997  | 3.46484  | 0.86229 | 0.0115211 | 0.0417157 | Up-regulated |
| NM_000544    | TAP2           | 6891   | 12.2565  | 15.6502  | 24.934   | 26.4833  | 0.86203 | 7.22E-13  | 1.28E-11  | Up-regulated |
| NM_181809    | BMP8A          | 353500 | 0.25866  | 0.465216 | 0.905293 | 0.884058 | 0.86185 | 0.0129386 | 0.0460089 | Up-regulated |
| NR_024012    | TEX264         | 51368  | 6.78036  | 5.94091  | 10.2306  | 16.316   | 0.86167 | 0.0029469 | 0.012971  | Up-regulated |
| NM_000435    | NOTCH3         | 4854   | 0.246832 | 0.255242 | 0.613496 | 0.532286 | 0.86122 | 0.0088296 | 0.0332952 | Up-regulated |
| NM_013376    | SERTAD1        | 29950  | 22.528   | 16.2255  | 35.4305  | 37.8871  | 0.86121 | 2.86E-06  | 2.47E-05  | Up-regulated |
| NM_001320114 | NUMB           | 8650   | 1.82207  | 2.23429  | 3.90838  | 3.97199  | 0.86094 | 0.0001208 | 0.0007652 | Up-regulated |
| NM_001277732 | AOC3           | 8639   | 1.75975  | 1.99482  | 3.94101  | 3.68443  | 0.85974 | 0.0011998 | 0.0059889 | Up-regulated |
| NM_198595    | AFAP1          | 60312  | 6.14453  | 6.81422  | 12.1097  | 11.5395  | 0.85952 | 1.65E-21  | 5.25E-20  | Up-regulated |
| NM_001267056 | CASP7          | 840    | 5.78185  | 5.69905  | 11.3581  | 10.0846  | 0.8595  | 8.64E-08  | 9.19E-07  | Up-regulated |
| NM_001282500 | TTC1           | 7265   | 2.37407  | 4.10869  | 8.12058  | 6.19807  | 0.85927 | 0.0065265 | 0.0257541 | Up-regulated |
| NM_001287601 | THAP5          | 168451 | 0.86263  | 0.559277 | 2.05364  | 1.38656  | 0.85807 | 0.0128406 | 0.0457307 | Up-regulated |
| NM_002114    | HIVEP1         | 3096   | 1.76203  | 2.27319  | 3.83922  | 3.70743  | 0.85773 | 2.24E-07  | 2.27E-06  | Up-regulated |
| NM_004998    | MYO1E          | 4643   | 27.3511  | 26.7083  | 49.2138  | 48.5941  | 0.85723 | 1.75E-72  | 2.52E-70  | Up-regulated |
| NM_002516    | NOVA2          | 4858   | 0.554059 | 0.579684 | 1.08529  | 1.17434  | 0.85684 | 0.000926  | 0.0047809 | Up-regulated |
| NM_006933    | SLC5A3         | 6526   | 27.2     | 30.3193  | 51.5617  | 52.5061  | 0.85486 | 4.56E-46  | 3.67E-44  | Up-regulated |
| NM_024119    | DHX58          | 79132  | 13.3492  | 13.7792  | 25.1722  | 24.1912  | 0.85446 | 2.38E-19  | 6.79E-18  | Up-regulated |
| NM_025194    | ITPKC          | 80271  | 6.55098  | 5.96649  | 11.4988  | 11.4761  | 0.85412 | 8.09E-12  | 1.30E-10  | Up-regulated |
| NM_001025160 | ADGRE5         | 976    | 15.0948  | 18.405   | 30.6111  | 30.5408  | 0.85386 | 1.36E-14  | 2.80E-13  | Up-regulated |
| NM_004913    | VPS9D1         | 9605   | 8.56046  | 8.31641  | 15.5929  | 15.2276  | 0.85303 | 2.02E-13  | 3.76E-12  | Up-regulated |
| NM_001024455 | RGAG4          | 340526 | 2.49007  | 2.01129  | 4.74445  | 3.87065  | 0.85257 | 7.46E-05  | 0.0004926 | Up-regulated |
| NR_024470    | LCO4A1-AS1     | 1E+08  | 5.44472  | 4.81655  | 10.5448  | 9.41197  | 0.85251 | 0.0002186 | 0.001305  | Up-regulated |
| NM_001130140 | ERAP2          | 64167  | 7.30548  | 7.1754   | 12.2713  | 14.1205  | 0.85219 | 4.00E-15  | 8.59E-14  | Up-regulated |
| NM_001199179 | ATP2C1         | 27032  | 1.05207  | 0.972367 | 2.13828  | 1.86362  | 0.85163 | 0.000636  | 0.0034153 | Up-regulated |
| NM_001319943 | PAM            | 5066   | 2.22437  | 2.55883  | 4.72675  | 4.16047  | 0.84984 | 3.21E-07  | 3.17E-06  | Up-regulated |
| NM_012262    | HS2ST1         | 9653   | 8.76503  | 8.51081  | 14.9762  | 16.2654  | 0.84931 | 2.56E-26  | 1.08E-24  | Up-regulated |
| NM_005418    | ST5            | 6764   | 5.04563  | 4.19247  | 11.1061  | 6.77819  | 0.84897 | 0.0002582 | 0.0015167 | Up-regulated |
| NM_015433    | METTL21B       | 25895  | 1.54673  | 1.51942  | 3.20146  | 2.9809   | 0.84881 | 0.0016929 | 0.0080634 | Up-regulated |
| NM_001330183 | SLFN5          | 162394 | 9.00546  | 8.28617  | 15.1255  | 16.0442  | 0.8472  | 1.04E-31  | 5.33E-30  | Up-regulated |
| NM_018936    | PCDHB2         | 56133  | 9.72986  | 8.89217  | 17.1255  | 16.7401  | 0.84612 | 1.92E-13  | 3.58E-12  | Up-regulated |
| NM_001320570 | ADAM10         | 102    | 1.6349   | 0.757478 | 2.00803  | 3.59961  | 0.84603 | 0.0123885 | 0.0444105 | Up-regulated |
| NM_001142616 | EHBP1          | 23301  | 13.5153  | 14.8647  | 26.1449  | 25.0171  | 0.84599 | 4.41E-27  | 1.92E-25  | Up-regulated |
| NM_020860    | STIM2          | 57620  | 7.03987  | 7.03667  | 13.8726  | 11.7423  | 0.84577 | 8.09E-13  | 1.43E-11  | Up-regulated |
| NM_001101802 | PHF21A         | 51317  | 3.51967  | 3.39496  | 5.62516  | 7.08401  | 0.84519 | 1.49E-08  | 1.73E-07  | Up-regulated |
| NM_002184    | IL6ST          | 3572   | 7.21652  | 8.58269  | 14.4365  | 14.161   | 0.84517 | 4.36E-18  | 1.14E-16  | Up-regulated |
| NM_001288999 | GMIP           | 51291  | 1.16947  | 1.86854  | 3.82695  | 2.63363  | 0.84514 | 0.0056331 | 0.0227215 | Up-regulated |
| NM_005560    | LAMA5          | 3911   | 1.69177  | 1.62227  | 3.02532  | 3.01214  | 0.84391 | 8.68E-12  | 1.39E-10  | Up-regulated |
| NM_006244    | PPP2R5B        | 5526   | 9.72717  | 10.3308  | 18.0636  | 18.287   | 0.84289 | 6.68E-15  | 1.41E-13  | Up-regulated |
| NM_203386    | RNH1           | 6050   | 1.99993  | 1.47018  | 2.92407  | 5.20184  | 0.84264 | 0.0128179 | 0.0456756 | Up-regulated |
| NM_020898    | CALCOCO1       | 57658  | 22.5031  | 21.923   | 40.6725  | 39.0414  | 0.84115 | 9.19E-34  | 5.03E-32  | Up-regulated |
| NM_032947    | SMIM3          | 85027  | 25.931   | 22.8247  | 42.3208  | 45.617   | 0.84087 | 4.96E-18  | 1.28E-16  | Up-regulated |
| NM_019624    | ABC9A          | 23457  | 1.14981  | 1.00082  | 3.00883  | 1.73487  | 0.84011 | 0.0094976 | 0.0354295 | Up-regulated |
| NM_001849    | COL6A2         | 1292   | 84.2212  | 89.3771  | 157.34   | 152.967  | 0.8401  | 4.65E-72  | 6.63E-70  | Up-regulated |
| NM_001304547 | MVB12A         | 93343  | 4.01875  | 3.28786  | 5.85384  | 9.82983  | 0.83919 | 0.0073792 | 0.02864   | Up-regulated |
| NM_001320663 | SHROOM2        | 357    | 5.99335  | 6.0073   | 11.0721  | 10.5641  | 0.83898 | 7.78E-16  | 1.75E-14  | Up-regulated |
| NM_014624    | S100A6         | 6277   | 22.14.83 | 2059.87  | 3727.93  | 3887.98  | 0.83771 | 2.66E-64  | 3.30E-62  | Up-regulated |
| NM_014570    | ARFGAP3        | 26286  | 12.0514  | 11.4576  | 21.6113  | 20.6625  | 0.83711 | 4.41E-17  | 1.07E-15  | Up-regulated |
| NM_032263    | IQC6           | 84223  | 6.84781  | 6.49601  | 12.014   | 12.4126  | 0.83695 | 1.98E-08  | 2.26E-07  | Up-regulated |
| NM_001860    | SLC31A2        | 1318   | 4.07859  | 4.38035  | 7.4728   | 8.74279  | 0.83675 | 0.0002164 | 0.0012924 | Up-regulated |
| NM_182765    | HECTD2         | 143279 | 1.03404  | 1.08688  | 1.89154  | 2.25939  | 0.83652 | 0.000835  | 0.0043626 | Up-regulated |
| NM_145298    | APOBEC3F       | 200316 | 2.63129  | 2.22614  | 4.03427  | 5.08579  | 0.83652 | 3.76E-05  | 0.0002636 | Up-regulated |
| NM_212502    | CDK18          | 5129   | 9.07358  | 9.43053  | 16.9368  | 16.3942  | 0.83613 | 1.45E-15  | 3.21E-14  | Up-regulated |
| NM_002249    | KCNN3          | 3782   | 0.301672 | 0.242226 | 0.501444 | 0.621321 | 0.83592 | 0.0044612 | 0.0185588 | Up-regulated |
| NM_001323970 | TIAL1          | 7073   | 0.547402 | 0.969415 | 1.82141  | 1.60566  | 0.83585 | 0.0114734 | 0.0416138 | Up-regulated |
| NM_015508    | se) polymerase | 25976  | 4.34883  | 2.98644  | 7.63167  | 6.26157  | 0.83452 | 0.0001385 | 0.0008673 | Up-regulated |
| NM_017586    | CACFD1         | 11094  | 4.51149  | 5.82511  | 9.60136  | 9.53643  | 0.83402 | 4.86E-06  | 4.06E-05  | Up-regulated |
| NM_014807    | C2CD2L         | 9854   | 2.46847  | 2.5699   | 5.16346  | 4.30564  | 0.8329  | 7.23E-05  | 0.0004789 | Up-regulated |
| NR_134466    | CARD19         | 84270  | 63.7864  | 58.8942  | 115.193  | 104.568  | 0.83167 | 1.53E-17  | 3.83E-16  | Up-regulated |
| NM_019594    | LRRC8A         | 56262  | 21.8655  | 21.9657  | 39.3953  | 38.5077  | 0.83033 | 3.78E-49  | 3.32E-47  | Up-regulated |
| NR_047521    | LINC01128      | 643837 | 0.961587 | 1.25354  | 1.96042  | 2.28902  | 0.82972 | 0.000443  | 0.0024698 | Up-regulated |
| NM_006873    | STON1          | 11037  | 2.15782  | 1.28618  | 3.51704  | 3.22994  | 0.82919 | 0.0013469 | 0.0066381 | Up-regulated |
| NM_001142478 | NREP           | 9315   | 9.12677  | 9.22737  | 16.909   | 16.2052  | 0.82908 | 4.72E-10  | 6.49E-09  | Up-regulated |
| NM_001165967 | HES7           | 84667  | 4.43274  | 4.38446  | 8.83789  | 7.81594  | 0.82869 | 0.0002115 | 0.0012674 | Up-regulated |
| NM_016332    | MSRB1          | 51734  | 37.2024  | 36.1162  | 66.8208  | 63.813   | 0.82849 | 1.10E-22  | 3.74E-21  | Up-regulated |
| NM_001098784 | FAM89B         | 23625  | 6.65892  | 7.08198  | 12.6819  | 12.78    | 0.82828 | 1.61E-05  | 0.0001214 | Up-regulated |
| NM_020733    | HEG1           | 57493  | 3.68957  | 4.16099  | 6.9607   | 7.10224  | 0.82808 | 5.15E-16  | 1.16E-14  | Up-regulated |
| NM_003407    | ZFP36          | 7538   | 6.68114  | 7.22935  | 13.1659  | 12.3449  | 0.82791 | 2.05E-06  | 1.82E-05  | Up-regulated |
| NM_005533    | IFI35          | 3430   | 54.1138  | 62.0983  | 110.486  | 97.5437  | 0.82787 | 8.62E-15  | 1.80E-13  | Up-regulated |
| NM_001142614 | EHBP1          | 23301  | 12.9621  | 13.0006  | 23.9185  | 22.2551  | 0.8278  | 6.15E-28  | 2.77E-26  | Up-regulated |
| NM_006521    | TFE3           | 7030   | 13.9685  | 13.5381  | 26.4908  | 22.7331  | 0.82715 | 1.09E-14  | 2.26E-13  | Up-regulated |
| NM_003374    | VDAC1          | 7416   | 2.17466  | 3.9203   | 7.65372  | 5.34561  | 0.82673 | 0.0083047 | 0.0316785 | Up-regulated |
| NM_000935    | PLOD2          | 5352   | 8.13141  | 9.43695  | 16.3953  | 15.1471  | 0.82635 | 1.88E-12  | 3.21E-11  | Up-regulated |
| NM_203394    | E2F7           | 144455 | 6.19802  | 6.5487   | 11.1091  | 11.6159  | 0.82546 | 1.13E-18  | 3.03E-17  | Up-regulated |
| NM_006096    | NDRG1          | 10397  | 134.326  | 131.751  | 237.227  | 232.839  | 0.82499 | 2.53E-133 | 8.62E-131 | Up-regulated |
| NM_021105    | PLSCR1         | 5359   | 53.0207  | 51.4135  | 90.1929  | 94.7696  | 0.82485 | 1.67E-44  | 1.28E-42  | Up-regulated |
| NM_025144    | ALPK1          | 80216  | 1.41146  | 1.18492  | 2.63907  | 2.27773  | 0.8247  | 0.0002958 | 0.0017161 | Up-regulated |
| NM_002566    | P2RY11         | 5032   | 6.90672  | 6.61976  | 11.6872  | 13.0049  | 0.82461 | 8.12E-07  | 7.65E-06  | Up-regulated |
| NM_177401    | MIDN           | 90007  | 20.4998  | 21.6256  | 38.6218  | 36.0915  | 0.82427 | 8.53E-30  | 4.09E-28  | Up-regulated |
| NM_005261    | GEM            | 2669   | 1.24029  | 0.943826 | 2.61052  | 2.29715  | 0.82309 | 0.0127759 | 0.0455598 | Up-regulated |
| NM_001164469 | MEK7-TICAM1    | 1E+08  | 3.17544  | 2.53891  | 5.09093  | 5.46324  | 0.82038 | 2.72E-05  | 0.0001963 | Up-regulated |
| NR_033403    | BMP1           | 649    | 1.89013  | 1.90285  | 2.77872  | 4.83758  | 0.81984 | 0.0041051 | 0.0172918 | Up-regulated |
| NM_001127183 | CFLAR          | 8837   | 1.34382  | 1.21209  | 2.21706  | 2.4089   | 0.81879 | 2.00E-07  | 2.04E-06  | Up-regulated |

|              |                |        |          |          |          |          |         |           |           |              |
|--------------|----------------|--------|----------|----------|----------|----------|---------|-----------|-----------|--------------|
| NM_001699    | AXL            | 558    | 0.913509 | 0.871527 | 1.7639   | 1.72404  | 0.81879 | 0.0019624 | 0.0091496 | Up-regulated |
| NM_138287    | DTX3L          | 151636 | 19.7549  | 19.8339  | 34.8702  | 34.8641  | 0.81816 | 5.95E-59  | 6.43E-57  | Up-regulated |
| NM_007350    | PHLDA1         | 22822  | 88.0894  | 86.6175  | 150.925  | 156.346  | 0.81813 | 2.49E-122 | 7.00E-120 | Up-regulated |
| NM_152280    | SYT11          | 23208  | 5.55573  | 6.20838  | 10.0377  | 10.9446  | 0.81771 | 1.09E-12  | 1.90E-11  | Up-regulated |
| NM_001032395 | ADGRG6         | 57211  | 0.471698 | 0.534791 | 0.966587 | 1.05276  | 0.81713 | 0.0044332 | 0.0184545 | Up-regulated |
| NR_126032    | MEMO1          | 51072  | 2.72378  | 2.06544  | 4.78397  | 4.92176  | 0.81646 | 0.0057271 | 0.0230278 | Up-regulated |
| NM_001317137 | PFKFB4         | 5210   | 0.911766 | 1.0816   | 2.10782  | 1.94115  | 0.81645 | 0.0049177 | 0.0202042 | Up-regulated |
| NR_027487    | LOC146880      | 146880 | 3.33698  | 4.3555   | 8.17709  | 6.27159  | 0.8162  | 0.0003474 | 0.001986  | Up-regulated |
| NM_033034    | TRIM5          | 85363  | 8.1682   | 7.89095  | 13.3366  | 15.3016  | 0.81572 | 5.33E-11  | 8.04E-10  | Up-regulated |
| NM_004510    | SP110          | 3431   | 8.31289  | 7.79921  | 13.9663  | 14.9736  | 0.81511 | 2.60E-08  | 2.94E-07  | Up-regulated |
| NM_032824    | TMEM87B        | 84910  | 11.9077  | 12.2352  | 20.6161  | 21.9306  | 0.81452 | 4.52E-28  | 2.04E-26  | Up-regulated |
| NM_001423    | EMP1           | 2012   | 93.8726  | 94.0409  | 162.216  | 167.448  | 0.81426 | 2.31E-93  | 4.51E-91  | Up-regulated |
| NM_001271028 | CDH19          | 28513  | 0.402224 | 0.509052 | 1.07442  | 0.874669 | 0.81397 | 0.0106087 | 0.0389435 | Up-regulated |
| NM_001077242 | DEPDC7         | 91614  | 6.54477  | 5.55487  | 10.3935  | 11.8197  | 0.81281 | 5.59E-05  | 0.0003794 | Up-regulated |
| NM_133471    | PPP1R18        | 170954 | 17.469   | 16.612   | 29.4193  | 30.4663  | 0.81221 | 6.45E-35  | 3.61E-33  | Up-regulated |
| NR_033659    | STAT6          | 6778   | 3.02302  | 3.60691  | 7.7579   | 4.86332  | 0.81199 | 0.0010166 | 0.0051839 | Up-regulated |
| NM_001225    | CASP4          | 837    | 16.3512  | 14.2213  | 25.5202  | 29.5555  | 0.81194 | 4.93E-07  | 4.78E-06  | Up-regulated |
| NM_001243076 | E2F3           | 1871   | 3.84444  | 4.04269  | 6.65492  | 7.47099  | 0.81193 | 1.86E-08  | 2.14E-07  | Up-regulated |
| NM_005668    | ST8SIA4        | 7903   | 0.562183 | 0.666706 | 1.13456  | 1.29484  | 0.81178 | 0.0037056 | 0.0158501 | Up-regulated |
| NM_001174166 | SLC16A6        | 9120   | 9.35806  | 10.9002  | 16.0951  | 20.2149  | 0.81144 | 2.48E-08  | 2.81E-07  | Up-regulated |
| NM_001321193 | TBL1XR1        | 79718  | 0.425863 | 0.977522 | 1.48998  | 1.55876  | 0.81126 | 0.0126362 | 0.0451541 | Up-regulated |
| NM_020959    | AN08           | 57719  | 20.1957  | 22.5982  | 39.2468  | 36.0913  | 0.81036 | 1.86E-21  | 5.90E-20  | Up-regulated |
| NM_004586    | RPS6KA3        | 6197   | 12.3675  | 12.2788  | 20.8503  | 22.4045  | 0.81026 | 5.57E-36  | 3.22E-34  | Up-regulated |
| NM_201574    | SLC4A3         | 6508   | 3.08657  | 2.08362  | 4.79218  | 4.8573   | 0.80998 | 0.0003352 | 0.0019232 | Up-regulated |
| NM_032242    | PLXNA1         | 5361   | 37.3355  | 38.2346  | 68.3152  | 63.8704  | 0.80852 | 7.08E-63  | 8.51E-61  | Up-regulated |
| NM_181358    | HIPK1          | 204851 | 2.16652  | 1.66497  | 3.38385  | 3.59284  | 0.80821 | 1.43E-05  | 0.0001088 | Up-regulated |
| NM_001285444 | PDXDC1         | 23042  | 1.75432  | 1.84894  | 3.29174  | 3.30497  | 0.80809 | 3.83E-05  | 0.0002683 | Up-regulated |
| NM_197939    | RNF135         | 84282  | 1.77226  | 2.07746  | 4.30869  | 3.43164  | 0.80802 | 0.0065601 | 0.025859  | Up-regulated |
| NM_006910    | RBBP6          | 5930   | 2.84186  | 3.01281  | 5.90177  | 4.63592  | 0.80714 | 9.70E-07  | 9.01E-06  | Up-regulated |
| NM_003936    | CDK5R2         | 8941   | 1.74162  | 2.06253  | 3.67287  | 3.64989  | 0.80646 | 0.0021803 | 0.0100093 | Up-regulated |
| NM_203384    | RNH1           | 6050   | 3.51863  | 3.59487  | 6.1838   | 7.27151  | 0.80632 | 0.0008448 | 0.0044065 | Up-regulated |
| NM_001122630 | CDKN1C         | 1028   | 2.51824  | 5.80486  | 9.72949  | 8.09445  | 0.80624 | 0.0127849 | 0.0455834 | Up-regulated |
| NM_001424    | EMP2           | 2013   | 17.2038  | 16.633   | 30.2884  | 28.9035  | 0.80574 | 1.97E-37  | 1.20E-35  | Up-regulated |
| NM_001042724 | NECTIN2        | 5819   | 6.56784  | 7.03303  | 11.5768  | 12.6092  | 0.8056  | 3.71E-09  | 4.62E-08  | Up-regulated |
| NM_031500    | PCDHA4         | 56144  | 1.43152  | 1.22794  | 2.44502  | 2.9546   | 0.8055  | 0.0070506 | 0.0275324 | Up-regulated |
| NR_131012    | stein coding)( | 283131 | 2.9292   | 5.21471  | 9.3703   | 7.79599  | 0.80533 | 0.0113377 | 0.0411843 | Up-regulated |
| NM_203349    | SHC4           | 399694 | 4.58517  | 4.70152  | 7.6293   | 8.90618  | 0.8053  | 8.10E-09  | 9.69E-08  | Up-regulated |
| NR_033440    | PAM            | 5066   | 1.02923  | 1.03563  | 1.64482  | 2.41094  | 0.80507 | 0.0035703 | 0.0153437 | Up-regulated |
| NM_006663    | PPP1R13L       | 10848  | 7.83842  | 7.87638  | 14.8907  | 12.9931  | 0.80473 | 5.33E-10  | 7.27E-09  | Up-regulated |
| NM_001001665 | CYP27C1        | 339761 | 1.77481  | 2.39474  | 4.09525  | 3.62494  | 0.80421 | 0.000266  | 0.0015583 | Up-regulated |
| NM_001331011 | ITSN1          | 6453   | 0.492831 | 0.898278 | 1.61305  | 1.37144  | 0.80415 | 0.0131499 | 0.0466496 | Up-regulated |
| NM_021127    | PMALP1         | 5366   | 15.0756  | 14.2303  | 24.8925  | 26.7687  | 0.80371 | 2.93E-12  | 4.88E-11  | Up-regulated |
| NM_001195798 | LDLR           | 3949   | 0.697636 | 1.40043  | 2.55806  | 1.87754  | 0.80331 | 0.0126075 | 0.0450684 | Up-regulated |
| NM_198040    | PHC2           | 1912   | 12.7598  | 13.6354  | 24.5612  | 21.7981  | 0.80274 | 4.27E-16  | 9.71E-15  | Up-regulated |
| NM_031449    | ZMIZ2          | 83637  | 3.00932  | 2.97487  | 5.47192  | 5.1628   | 0.80262 | 2.16E-08  | 2.47E-07  | Up-regulated |
| NM_001300988 | PTBP2          | 58155  | 0.593943 | 0.766894 | 1.49491  | 1.43188  | 0.80261 | 0.0138361 | 0.0486863 | Up-regulated |
| NM_001290    | LDB2           | 9079   | 3.72261  | 2.08136  | 6.28813  | 5.25903  | 0.80232 | 0.0057455 | 0.0230727 | Up-regulated |
| NM_001130158 | MYO1B          | 4430   | 4.46969  | 3.81869  | 7.52071  | 7.18263  | 0.80216 | 3.55E-09  | 4.43E-08  | Up-regulated |
| NM_001164189 | PLIN3          | 10226  | 2.94398  | 3.02283  | 4.79098  | 6.52157  | 0.80047 | 0.0014761 | 0.0071658 | Up-regulated |
| NM_001322272 | CPSF2          | 53981  | 0.605602 | 1.28421  | 2.00895  | 2.01381  | 0.79965 | 0.0134461 | 0.0475502 | Up-regulated |
| NM_001308824 | SF3B1          | 23451  | 4.67824  | 4.85668  | 8.68197  | 8.51394  | 0.79867 | 1.34E-05  | 0.0001026 | Up-regulated |
| NM_001195278 | TMEM178B       | 1E+08  | 0.795098 | 0.783455 | 1.3501   | 1.52187  | 0.79792 | 5.55E-05  | 0.000377  | Up-regulated |
| NM_001272095 | STX4           | 6810   | 5.91396  | 5.3401   | 8.86557  | 12.1147  | 0.79737 | 0.0008822 | 0.0045867 | Up-regulated |
| NM_001321783 | FAM208B        | 54906  | 2.13788  | 1.46204  | 4.99782  | 2.27808  | 0.7967  | 0.0083139 | 0.0317072 | Up-regulated |
| NM_001282551 | BTBD3          | 22903  | 2.47938  | 2.12085  | 3.65899  | 4.76333  | 0.79571 | 0.0002084 | 0.0012507 | Up-regulated |
| NM_005863    | NET1           | 10276  | 2.91873  | 2.76595  | 4.91894  | 5.2523   | 0.79407 | 4.59E-06  | 3.85E-05  | Up-regulated |
| NM_003107    | SOX4           | 6659   | 62.4756  | 63.3346  | 108.842  | 108.735  | 0.79389 | 3.77E-117 | 9.62E-115 | Up-regulated |
| NM_001319842 | CAPRN2         | 65981  | 2.80916  | 3.76144  | 5.54268  | 6.37555  | 0.79374 | 5.71E-05  | 0.0003863 | Up-regulated |
| NM_001346890 | M_00134689     | NA     | 0.803161 | 1.47872  | 2.52328  | 2.29817  | 0.79354 | 0.0142498 | 0.0499853 | Up-regulated |
| NM_022872    | IFI6           | 2537   | 167.394  | 157.802  | 292.427  | 270.482  | 0.79182 | 4.40E-29  | 2.05E-27  | Up-regulated |
| NM_201383    | PLEC           | 5339   | 15.5667  | 21.3454  | 35.3009  | 32.1529  | 0.79167 | 0.0002193 | 0.0013089 | Up-regulated |
| NM_182914    | SYNE2          | 23224  | 0.87427  | 0.965914 | 1.41824  | 1.86861  | 0.79119 | 6.26E-06  | 5.14E-05  | Up-regulated |
| NM_001903    | CTNNA1         | 1495   | 143.034  | 146.23   | 247.009  | 251.921  | 0.79048 | 6.81E-131 | 2.10E-128 | Up-regulated |
| NM_001191060 | SLC25A22       | 79751  | 4.02579  | 4.42092  | 8.95614  | 6.46065  | 0.79043 | 0.0002479 | 0.001461  | Up-regulated |
| NM_007046    | EMILIN1        | 11117  | 58.5776  | 59.4845  | 104.688  | 99.1975  | 0.79041 | 1.43E-62  | 1.68E-60  | Up-regulated |
| NM_003033    | ST3GAL1        | 6482   | 2.20419  | 3.00598  | 5.71418  | 3.9006   | 0.79003 | 0.0005549 | 0.0030191 | Up-regulated |
| NM_001193349 | MEF2C          | 4208   | 2.3374   | 2.24182  | 3.77174  | 4.37238  | 0.78963 | 2.93E-06  | 2.52E-05  | Up-regulated |
| NM_005606    | LGMN           | 5641   | 36.4934  | 39.3066  | 65.0229  | 66.1228  | 0.78956 | 2.74E-28  | 1.25E-26  | Up-regulated |
| NM_000282    | PCCA           | 5095   | 2.04589  | 2.45625  | 4.17695  | 4.25082  | 0.78936 | 0.0013958 | 0.0068488 | Up-regulated |
| NM_014330    | PPP1R15A       | 23645  | 64.1712  | 62.1055  | 110.811  | 107.113  | 0.78923 | 1.39E-53  | 1.37E-51  | Up-regulated |
| NM_152832    | FAM89B         | 23625  | 4.1327   | 4.62187  | 7.8748   | 8.51533  | 0.78914 | 0.0014077 | 0.0069006 | Up-regulated |
| NM_004052    | BNIP3          | 664    | 66.4286  | 62.1055  | 104.723  | 117.96   | 0.7879  | 9.09E-21  | 2.81E-19  | Up-regulated |
| NM_000700    | ANXA1          | 301    | 150.533  | 139.686  | 240.436  | 260.651  | 0.78782 | 5.92E-34  | 3.27E-32  | Up-regulated |
| NM_001130714 | LEF1           | 51176  | 2.19394  | 3.15964  | 4.90635  | 5.00227  | 0.78768 | 0.0007008 | 0.0037245 | Up-regulated |
| NM_033182    | FBXO44         | 93611  | 1.10301  | 1.73455  | 3.25942  | 2.53725  | 0.78695 | 0.0111376 | 0.0405885 | Up-regulated |
| NM_018051    | WDR60          | 55112  | 4.13501  | 4.59072  | 7.39774  | 7.99008  | 0.78674 | 1.27E-07  | 1.33E-06  | Up-regulated |
| NM_144633    | KCNH8          | 131096 | 0.993172 | 1.02975  | 1.78311  | 1.99846  | 0.78519 | 0.0016353 | 0.0078171 | Up-regulated |
| NR_033389    | OC10013221     | 1E+08  | 1.50213  | 1.55464  | 3.02442  | 3.21296  | 0.78515 | 0.0120527 | 0.0433937 | Up-regulated |
| NM_015193    | ARC            | 23237  | 1.5344   | 1.34459  | 3.028    | 2.52226  | 0.78486 | 0.0051651 | 0.0211055 | Up-regulated |
| NM_001142421 | MORF4L2        | 9643   | 3.74868  | 4.30174  | 6.3659   | 8.73262  | 0.78486 | 0.0018763 | 0.0087976 | Up-regulated |
| NR_040093    | STAR4-AS1      | 1E+08  | 0.607543 | 0.559543 | 1.09851  | 1.19146  | 0.7842  | 0.0076622 | 0.0296048 | Up-regulated |
| NM_031477    | YPEL3          | 83719  | 11.6681  | 12.7566  | 22.4736  | 20.3945  | 0.78333 | 9.77E-08  | 1.04E-06  | Up-regulated |
| NM_153704    | TMEM67         | 91147  | 1.45334  | 1.5411   | 2.64276  | 2.80162  | 0.7832  | 0.0002455 | 0.0014482 | Up-regulated |
| NM_006497    | HIC1           | 3090   | 1.84104  | 1.71405  | 3.5894   | 3.03274  | 0.7829  | 0.001685  | 0.0080309 | Up-regulated |

|              |            |        |          |          |         |         |         |           |           |              |
|--------------|------------|--------|----------|----------|---------|---------|---------|-----------|-----------|--------------|
| NR_026717    | STK19      | 8859   | 4.73119  | 5.2357   | 8.65522 | 9.35996 | 0.78247 | 0.0001378 | 0.0008635 | Up-regulated |
| NM_001080421 | UNC13A     | 23025  | 27.2517  | 29.4752  | 50.3955 | 47.1435 | 0.78202 | 3.43E-39  | 2.21E-37  | Up-regulated |
| NM_001915    | CYB561     | 1534   | 6.69123  | 6.87661  | 13.3074 | 10.6433 | 0.78185 | 1.40E-06  | 1.27E-05  | Up-regulated |
| NR_125739    | CEBPB-AS1  | 1E+08  | 4.9851   | 5.49476  | 9.44938 | 8.96051 | 0.78098 | 2.47E-07  | 2.49E-06  | Up-regulated |
| NM_017709    | FAM46C     | 54855  | 0.873066 | 0.923471 | 1.53566 | 1.8051  | 0.78086 | 0.0020562 | 0.0095312 | Up-regulated |
| NM_001142541 | SLC35B3    | 51000  | 2.17336  | 3.2328   | 5.54187 | 5.00352 | 0.7791  | 0.0074194 | 0.0287786 | Up-regulated |
| NR_104041    | SERGEF     | 26297  | 9.25679  | 8.45974  | 15.4507 | 15.853  | 0.77746 | 1.19E-05  | 9.19E-05  | Up-regulated |
| NM_001553    | IGFBP7     | 3490   | 114.046  | 107.708  | 192.879 | 186.737 | 0.77645 | 1.44E-36  | 8.47E-35  | Up-regulated |
| NM_001201397 | EDNRB      | 1910   | 1.1361   | 1.25362  | 2.17558 | 2.25654 | 0.77635 | 0.0014513 | 0.0070814 | Up-regulated |
| NM_001698    | AUH        | 549    | 5.20725  | 5.75767  | 10.5771 | 9.15064 | 0.77361 | 0.0003915 | 0.0022114 | Up-regulated |
| NM_016274    | PLEKHO1    | 51177  | 21.3551  | 22.8508  | 38.1367 | 37.6769 | 0.77255 | 5.88E-19  | 1.62E-17  | Up-regulated |
| NM_006813    | PNRC1      | 10957  | 22.1841  | 22.6197  | 39.479  | 37.2617 | 0.77249 | 3.51E-19  | 9.85E-18  | Up-regulated |
| NM_002937    | RNASE4     | 6038   | 3.64095  | 3.50384  | 6.46228 | 6.58084 | 0.7724  | 0.0009746 | 0.0049954 | Up-regulated |
| NM_138334    | JOSD2      | 126119 | 14.9951  | 14.4413  | 21.9883 | 31.968  | 0.77187 | 0.0016309 | 0.0078002 | Up-regulated |
| NM_005531    | IFI16      | 3428   | 59.7449  | 59.1576  | 97.544  | 105.336 | 0.77162 | 7.32E-40  | 4.80E-38  | Up-regulated |
| NM_004207    | SLC16A3    | 9123   | 198.553  | 197.298  | 342.496 | 331.36  | 0.77147 | 2.09E-100 | 4.38E-98  | Up-regulated |
| NM_024420    | PLA2G4A    | 5321   | 11.0943  | 11.0822  | 18.7674 | 19.312  | 0.77138 | 4.34E-15  | 9.33E-14  | Up-regulated |
| NM_001229    | CASP9      | 842    | 3.91441  | 4.05481  | 7.41167 | 6.56974 | 0.77057 | 9.84E-06  | 7.76E-05  | Up-regulated |
| NM_032482    | DOTIL      | 84444  | 23.1551  | 25.2351  | 42.7599 | 39.8356 | 0.77016 | 4.35E-31  | 2.18E-29  | Up-regulated |
| NM_001666    | ARHGAP4    | 393    | 2.30862  | 2.06579  | 3.9854  | 3.92616 | 0.77007 | 0.0004108 | 0.0023109 | Up-regulated |
| NM_001256166 | BIRC2      | 329    | 5.38477  | 3.51313  | 7.15913 | 9.39083 | 0.76945 | 0.0027966 | 0.0124121 | Up-regulated |
| NM_001329444 | PPP1R16A   | 84988  | 3.92871  | 3.75832  | 5.84755 | 7.97408 | 0.76927 | 0.0003909 | 0.0022084 | Up-regulated |
| NR_024019    | FAM193B    | 54540  | 6.23439  | 6.33315  | 11.0458 | 10.5199 | 0.7687  | 1.35E-13  | 2.56E-12  | Up-regulated |
| NM_001206797 | PKM        | 5315   | 17.0018  | 16.368   | 26.6336 | 30.6748 | 0.768   | 2.69E-12  | 4.50E-11  | Up-regulated |
| NM_003113    | SP100      | 6672   | 8.134    | 8.03281  | 14.0561 | 13.6722 | 0.76797 | 5.50E-14  | 1.08E-12  | Up-regulated |
| NM_001270546 | AKAP13     | 11214  | 9.92408  | 9.93306  | 17.1134 | 16.6683 | 0.76728 | 2.02E-40  | 1.36E-38  | Up-regulated |
| NM_019015    | CHPF2      | 54480  | 23.8575  | 24.3497  | 42.8469 | 39.2922 | 0.76709 | 1.23E-27  | 5.46E-26  | Up-regulated |
| NM_001330230 | IFI35      | 3430   | 31.1388  | 22.4686  | 40.8624 | 54.2388 | 0.76614 | 0.0001269 | 0.0008003 | Up-regulated |
| NM_000527    | LDLR       | 3949   | 70.3313  | 71.5229  | 123.668 | 117.08  | 0.76599 | 6.05E-70  | 8.43E-68  | Up-regulated |
| NM_001280791 | SURF4      | 6836   | 1.22528  | 1.16263  | 2.16729 | 2.42353 | 0.76539 | 0.0070083 | 0.0273897 | Up-regulated |
| NM_014971    | EFR3B      | 22979  | 2.14338  | 2.14703  | 3.86296 | 3.56111 | 0.76504 | 8.32E-08  | 8.86E-07  | Up-regulated |
| NM_003388    | CLIP2      | 7461   | 1.62263  | 1.67064  | 3.77654 | 2.34747 | 0.76494 | 0.0032778 | 0.0142171 | Up-regulated |
| NR_144567    | NR_144567  | NA     | 19.4119  | 20.3982  | 33.8997 | 33.6424 | 0.76453 | 3.75E-56  | 3.85E-54  | Up-regulated |
| NM_018930    | PCDHB10    | 56126  | 2.68434  | 2.38846  | 4.25585 | 4.79427 | 0.76397 | 0.0002977 | 0.0017263 | Up-regulated |
| NM_198082    | CCDC57     | 284001 | 2.18696  | 2.00394  | 3.66323 | 3.9181  | 0.7639  | 0.0010052 | 0.0051346 | Up-regulated |
| NM_002205    | ITGA5      | 3678   | 77.4671  | 81.9759  | 137.102 | 132.949 | 0.7626  | 1.27E-62  | 1.50E-60  | Up-regulated |
| NM_001330599 | TRPS1      | 7227   | 1.40172  | 1.99475  | 2.82415 | 3.19634 | 0.76221 | 0.0001461 | 0.0009093 | Up-regulated |
| NM_001256847 | ABR        | 29     | 23.2332  | 19.505   | 37.5427 | 35.3914 | 0.76165 | 3.00E-14  | 6.03E-13  | Up-regulated |
| NM_001139500 | FGF13      | 2258   | 6.11925  | 6.41267  | 11.9214 | 9.98883 | 0.76149 | 1.19E-05  | 9.23E-05  | Up-regulated |
| NM_002116    | HLA-A      | 3105   | 253.712  | 255.335  | 431.513 | 427.457 | 0.75956 | 8.47E-120 | 2.31E-117 | Up-regulated |
| NM_001444    | FABP5      | 2171   | 1177.65  | 1127.54  | 1912.65 | 1974.35 | 0.75954 | 6.04E-79  | 9.95E-77  | Up-regulated |
| NM_001195044 | YAP1       | 10413  | 9.65036  | 9.14731  | 16.4174 | 15.5095 | 0.75881 | 1.12E-19  | 3.25E-18  | Up-regulated |
| NM_001199135 | TANK       | 10010  | 8.67333  | 9.30702  | 15.2392 | 15.6684 | 0.75866 | 5.59E-08  | 6.08E-07  | Up-regulated |
| NM_001186    | BACH1      | 571    | 4.0694   | 4.88156  | 8.23834 | 7.2031  | 0.75855 | 2.22E-07  | 2.25E-06  | Up-regulated |
| NM_001042529 | COASY      | 80347  | 5.90625  | 4.46407  | 9.5389  | 8.87065 | 0.75814 | 0.0002823 | 0.0016457 | Up-regulated |
| NM_001244992 | PPP1R12A   | 4659   | 1.71215  | 1.95178  | 3.78217 | 2.80148 | 0.75792 | 0.0007925 | 0.0041624 | Up-regulated |
| NM_001330358 | MTHFR      | 4524   | 3.7103   | 1.94299  | 5.86975 | 4.60544 | 0.75787 | 0.0040029 | 0.0169437 | Up-regulated |
| NM_003713    | PLPP3      | 8613   | 12.6608  | 12.6485  | 21.4695 | 21.4541 | 0.75778 | 4.16E-19  | 1.15E-17  | Up-regulated |
| NM_020177    | FEM1C      | 56929  | 4.31359  | 4.33287  | 7.1742  | 7.57343 | 0.75731 | 1.23E-11  | 1.95E-10  | Up-regulated |
| NM_198490    | RAB43      | 339122 | 16.2982  | 13.639   | 27.0107 | 24.0348 | 0.75703 | 1.78E-11  | 2.79E-10  | Up-regulated |
| NM_199282    | ARHGAP27   | 201176 | 2.15155  | 1.81606  | 4.42821 | 2.95306 | 0.75505 | 0.0049771 | 0.0204071 | Up-regulated |
| NM_001206567 | IFI16      | 3428   | 5.576    | 6.52266  | 11.0998 | 9.85989 | 0.75439 | 4.58E-06  | 3.85E-05  | Up-regulated |
| NM_002038    | IFI6       | 2537   | 975.839  | 931.376  | 1641.59 | 1562.94 | 0.75346 | 1.79E-67  | 2.34E-65  | Up-regulated |
| NM_001173982 | CHST11     | 50515  | 16.8826  | 19.3928  | 31.9914 | 29.4227 | 0.75319 | 4.24E-17  | 1.03E-15  | Up-regulated |
| NM_152737    | RNF182     | 221687 | 2.72341  | 2.64557  | 5.65552 | 4.02583 | 0.7523  | 0.0014586 | 0.0071003 | Up-regulated |
| NM_001134870 | PPP1R18    | 170954 | 21.7671  | 22.1096  | 37.6593 | 36.3064 | 0.75141 | 3.31E-26  | 1.38E-24  | Up-regulated |
| NM_000210    | ITGA6      | 3655   | 17.7001  | 18.3003  | 29.6132 | 30.967  | 0.75122 | 5.32E-37  | 3.21E-35  | Up-regulated |
| NM_001190992 | SLC33A1    | 9197   | 2.8521   | 2.87382  | 5.4445  | 4.78027 | 0.75092 | 0.0009509 | 0.0048918 | Up-regulated |
| NM_033238    | PML        | 5371   | 7.13404  | 7.21455  | 12.4107 | 11.8171 | 0.75046 | 2.48E-17  | 6.12E-16  | Up-regulated |
| NM_001169109 | SCO2       | 9997   | 4.8076   | 4.64362  | 8.61377 | 9.13337 | 0.75036 | 0.0067546 | 0.0265282 | Up-regulated |
| NM_006852    | TLK2       | 11011  | 4.09488  | 3.46027  | 6.24765 | 6.68591 | 0.74884 | 1.93E-07  | 1.98E-06  | Up-regulated |
| NM_001244638 | ARID5B     | 84159  | 3.17055  | 3.38067  | 5.58235 | 5.52345 | 0.74848 | 1.75E-10  | 2.53E-09  | Up-regulated |
| NM_001198793 | RPC4-TTLL  | 1E+08  | 3.37026  | 5.01017  | 7.54291 | 7.22246 | 0.74828 | 0.0003576 | 0.0020389 | Up-regulated |
| NM_016269    | LEF1       | 51176  | 10.0015  | 10.8052  | 17.93   | 17.2171 | 0.74809 | 2.05E-14  | 4.16E-13  | Up-regulated |
| NM_018976    | SLC38A2    | 54407  | 55.099   | 55.9275  | 91.9033 | 94.1068 | 0.748   | 3.83E-85  | 6.77E-83  | Up-regulated |
| NM_001161354 | PLEKHA4    | 57664  | 10.4242  | 7.69486  | 15.7238 | 15.517  | 0.74755 | 8.61E-06  | 6.86E-05  | Up-regulated |
| NM_001033046 | C17orf62   | 79415  | 8.80451  | 9.57179  | 17.0706 | 14.4179 | 0.74546 | 1.90E-06  | 1.69E-05  | Up-regulated |
| NM_144949    | SOC5       | 9655   | 5.47398  | 5.68214  | 9.41296 | 9.44602 | 0.7451  | 2.08E-11  | 3.25E-10  | Up-regulated |
| NM_001161476 | WDR25      | 79446  | 2.51798  | 2.84653  | 5.13037 | 4.63185 | 0.74397 | 0.004102  | 0.0172827 | Up-regulated |
| NR_134605    | OC10192780 | 1E+08  | 15.4144  | 20.2189  | 34.0136 | 30.4495 | 0.74333 | 0.0038954 | 0.0165508 | Up-regulated |
| NM_001174157 | ZFAT       | 57623  | 1.49263  | 1.03065  | 2.09603 | 2.63592 | 0.74324 | 0.0081941 | 0.0313193 | Up-regulated |
| NM_001098536 | USP5       | 8078   | 2.58254  | 1.97659  | 3.2655  | 5.36005 | 0.74283 | 0.0101573 | 0.0375459 | Up-regulated |
| NM_138288    | SPTSSA     | 171546 | 23.7296  | 22.2955  | 38.4493 | 38.7349 | 0.74265 | 5.48E-22  | 1.78E-20  | Up-regulated |
| NM_000189    | HK2        | 3099   | 27.9479  | 28.1931  | 46.5131 | 47.1599 | 0.74159 | 4.22E-74  | 6.30E-72  | Up-regulated |
| NM_001453    | FOXC1      | 2296   | 2.39265  | 2.18426  | 4.07686 | 3.93038 | 0.74037 | 0.0003672 | 0.0020865 | Up-regulated |
| NM_004694    | SLC16A6    | 9120   | 59.9984  | 58.2617  | 99.9324 | 97.1498 | 0.7399  | 1.95E-66  | 2.48E-64  | Up-regulated |
| NM_001165036 | OGDH       | 4967   | 3.51933  | 2.19241  | 4.81857 | 5.40327 | 0.73778 | 0.0023705 | 0.0107608 | Up-regulated |
| NM_003762    | VAMP4      | 8674   | 0.869732 | 1.02481  | 1.61971 | 1.82688 | 0.73738 | 0.0049519 | 0.0203169 | Up-regulated |
| NR_033302    | DHX9       | 1660   | 2.84287  | 2.17286  | 4.57139 | 4.15723 | 0.73686 | 0.0002421 | 0.00143   | Up-regulated |
| NM_001318054 | HRAS       | 3265   | 6.3094   | 4.9998   | 11.0415 | 9.56072 | 0.73604 | 0.005484  | 0.0222137 | Up-regulated |
| NM_014297    | ETHE1      | 23474  | 54.8711  | 53.1195  | 87.357  | 92.8846 | 0.73486 | 2.40E-15  | 5.24E-14  | Up-regulated |
| NM_018299    | UBE2       | 55284  | 2.19404  | 2.55371  | 3.907   | 4.12279 | 0.73342 | 1.82E-07  | 1.87E-06  | Up-regulated |
| NM_025106    | SPSB1      | 80176  | 28.4946  | 28.6034  | 49.7835 | 45.2658 | 0.73291 | 7.08E-23  | 2.43E-21  | Up-regulated |
| NM_001193511 | MAP3K12    | 7786   | 8.21252  | 8.50991  | 14.246  | 13.7459 | 0.73262 | 1.21E-12  | 2.10E-11  | Up-regulated |

|              |                |        |          |          |          |         |         |           |           |              |
|--------------|----------------|--------|----------|----------|----------|---------|---------|-----------|-----------|--------------|
| NM_006042    | HS3T3A1        | 9955   | 3.49946  | 3.68299  | 5.8398   | 6.36746 | 0.73231 | 1.51E-06  | 1.36E-05  | Up-regulated |
| NM_001195150 | OC10013070     | 1E+08  | 1.45157  | 1.4979   | 2.92972  | 2.37142 | 0.73166 | 0.0040423 | 0.0170768 | Up-regulated |
| NM_198156    | VHL            | 7428   | 1.43916  | 0.915378 | 2.03691  | 2.38392 | 0.73108 | 0.0122025 | 0.0438258 | Up-regulated |
| NM_001145301 | RARA           | 5914   | 11.8571  | 16.4035  | 25.1071  | 22.8564 | 0.73073 | 3.79E-06  | 3.22E-05  | Up-regulated |
| NM_001256007 | PNPLA8         | 50640  | 4.25999  | 4.9104   | 7.99688  | 7.4566  | 0.73059 | 1.19E-07  | 1.24E-06  | Up-regulated |
| NM_031924    | RSPH3          | 83861  | 0.967469 | 1.39234  | 1.83669  | 2.44626 | 0.73035 | 0.0057414 | 0.0230659 | Up-regulated |
| NM_001081491 | NXF1           | 10482  | 7.9684   | 8.92796  | 14.8793  | 13.4254 | 0.73034 | 2.85E-10  | 4.03E-09  | Up-regulated |
| NM_007112    | THBS3          | 7059   | 13.0603  | 11.4985  | 20.4453  | 20.5387 | 0.73029 | 1.22E-12  | 2.11E-11  | Up-regulated |
| NM_000164    | GIPR           | 2696   | 1.31381  | 1.23844  | 2.5645   | 2.15232 | 0.72958 | 0.0089048 | 0.0335393 | Up-regulated |
| NM_001271168 | PCED1A         | 64773  | 12.9666  | 11.8258  | 21.4528  | 20.2882 | 0.72944 | 6.16E-08  | 6.66E-07  | Up-regulated |
| NM_024613    | PLEKHF2        | 79666  | 4.4843   | 4.06381  | 7.04912  | 7.49918 | 0.72897 | 1.67E-05  | 0.0001254 | Up-regulated |
| NM_001144936 | C11orf95       | 65998  | 12.5075  | 12.4213  | 21.0056  | 20.3042 | 0.72774 | 1.23E-27  | 5.47E-26  | Up-regulated |
| NM_004715    | CTDP1          | 9150   | 10.7745  | 14.1643  | 23.9536  | 18.4859 | 0.72667 | 2.17E-05  | 0.0001593 | Up-regulated |
| NM_014034    | ASF1A          | 25842  | 8.48912  | 7.78743  | 13.4762  | 13.8575 | 0.72659 | 4.34E-08  | 4.78E-07  | Up-regulated |
| NM_001170820 | IFITM10        | 402778 | 27.4075  | 28.4147  | 46.4147  | 45.712  | 0.72339 | 1.13E-36  | 6.75E-35  | Up-regulated |
| NM_025181    | SLC35F5        | 80255  | 5.3651   | 5.64798  | 8.9721   | 9.2285  | 0.72268 | 4.52E-22  | 1.48E-20  | Up-regulated |
| NR_026850    | MTMR9LP        | 339483 | 5.18808  | 4.14816  | 8.50574  | 7.59296 | 0.72165 | 0.0004616 | 0.0025669 | Up-regulated |
| NM_015574    | ANKRD17        | 26057  | 0.893433 | 0.724081 | 1.64925  | 1.21651 | 0.72154 | 0.003103  | 0.0135455 | Up-regulated |
| NM_000887    | ITGAX          | 3687   | 1.69959  | 1.60873  | 2.95792  | 2.74322 | 0.72152 | 0.0005326 | 0.0029099 | Up-regulated |
| NM_001323069 | PFKP           | 5214   | 1.45283  | 1.38628  | 2.7187   | 2.54751 | 0.72073 | 0.0117199 | 0.0422754 | Up-regulated |
| NM_005907    | MAN1A1         | 4121   | 4.04086  | 4.20272  | 6.82244  | 6.91497 | 0.72071 | 5.38E-09  | 6.61E-08  | Up-regulated |
| NM_152910    | DGKH           | 160851 | 0.836598 | 0.462382 | 1.32322  | 1.04068 | 0.72053 | 0.0090045 | 0.0338614 | Up-regulated |
| NM_198055    | MZF1           | 7593   | 3.4679   | 2.76971  | 5.59593  | 5.20617 | 0.72024 | 0.0007838 | 0.0041301 | Up-regulated |
| NM_016061    | YPEL5          | 51646  | 22.0242  | 19.3009  | 32.3293  | 36.2975 | 0.71991 | 2.23E-10  | 3.19E-09  | Up-regulated |
| NM_001297549 | UPF1           | 5976   | 2.24958  | 2.88737  | 3.98293  | 4.82393 | 0.71913 | 0.0003234 | 0.00186   | Up-regulated |
| NM_001284236 | ZFYVE16        | 9765   | 2.91164  | 3.06743  | 4.53238  | 5.49848 | 0.71801 | 1.45E-06  | 1.32E-05  | Up-regulated |
| NM_001242855 | ARFIP2         | 23647  | 1.34101  | 1.22772  | 2.2607   | 2.32806 | 0.7179  | 0.006351  | 0.0251449 | Up-regulated |
| NR_026899    | LOC146880      | 146880 | 4.669    | 5.52457  | 9.28584  | 7.99404 | 0.71779 | 6.86E-05  | 0.0004571 | Up-regulated |
| NM_178537    | B4GALNT4       | 338707 | 2.57847  | 2.68287  | 4.81546  | 4.20566 | 0.71751 | 0.0003682 | 0.0020909 | Up-regulated |
| NR_109790    | RAB24          | 53917  | 5.52317  | 8.74681  | 12.4793  | 12.529  | 0.71718 | 0.0027919 | 0.0123999 | Up-regulated |
| NM_001769    | CD9            | 928    | 73.5004  | 73.5847  | 122.822  | 118.746 | 0.71769 | 3.29E-30  | 1.58E-28  | Up-regulated |
| NM_020730    | DLG3           | 1741   | 2.42659  | 2.52856  | 4.57784  | 3.82801 | 0.71659 | 7.16E-05  | 0.0004747 | Up-regulated |
| NM_005708    | GPC6           | 10082  | 3.97235  | 4.11508  | 6.96472  | 6.43295 | 0.71638 | 6.52E-11  | 9.78E-10  | Up-regulated |
| NM_001040197 | AGTRAP         | 57085  | 8.754    | 7.02344  | 13.2626  | 13.9132 | 0.71614 | 0.0009178 | 0.0047471 | Up-regulated |
| NM_001793    | CDH3           | 1001   | 1.00201  | 1.30311  | 2.12388  | 2.08895 | 0.71587 | 0.011551  | 0.0417924 | Up-regulated |
| NM_003596    | TPST1          | 8460   | 9.97379  | 11.498   | 17.9491  | 17.8321 | 0.71584 | 2.11E-07  | 2.15E-06  | Up-regulated |
| NM_005730    | CTDSP2         | 10106  | 30.9793  | 32.2545  | 51.2075  | 52.4321 | 0.71492 | 3.79E-47  | 3.15E-45  | Up-regulated |
| NM_018381    | C19orf66       | 55337  | 28.4765  | 28.3604  | 48.5625  | 44.8844 | 0.71466 | 2.63E-18  | 6.90E-17  | Up-regulated |
| NR_135527    | DLG4           | 1742   | 2.25777  | 2.25569  | 4.45309  | 3.34976 | 0.71439 | 0.0013028 | 0.006449  | Up-regulated |
| NM_001008213 | OPTN           | 10133  | 2.40397  | 2.35848  | 3.39935  | 5.02496 | 0.71428 | 0.0045026 | 0.0187145 | Up-regulated |
| NM_001271933 | CEP164         | 22897  | 1.82609  | 1.53032  | 2.56769  | 3.24237 | 0.71419 | 0.0012682 | 0.006299  | Up-regulated |
| NM_013443    | T6GALNAC       | 30815  | 7.58613  | 7.64339  | 12.0801  | 13.3194 | 0.71402 | 4.66E-07  | 4.52E-06  | Up-regulated |
| NM_005319    | HIST1H1C       | 3006   | 113.383  | 111.177  | 174.24   | 194.922 | 0.71328 | 1.84E-14  | 3.75E-13  | Up-regulated |
| NM_005255    | GAK            | 2580   | 31.1493  | 31.8256  | 52.3665  | 50.6683 | 0.71243 | 6.44E-45  | 4.98E-43  | Up-regulated |
| NM_001318537 | SPRY2          | 10253  | 3.42773  | 3.42228  | 6.10139  | 5.55094 | 0.71149 | 0.000302  | 0.0017493 | Up-regulated |
| NM_025132    | WDR19          | 57728  | 5.84601  | 5.84122  | 9.27177  | 10.0349 | 0.711   | 5.04E-10  | 6.91E-09  | Up-regulated |
| NM_004458    | ACSL4          | 2182   | 3.17843  | 4.5854   | 7.41693  | 5.8934  | 0.70947 | 0.0008779 | 0.0045669 | Up-regulated |
| NM_052839    | PANX2          | 56666  | 20.1519  | 19.909   | 32.9891  | 32.5787 | 0.70941 | 2.01E-23  | 7.14E-22  | Up-regulated |
| NM_003489    | NRIP1          | 8204   | 2.41193  | 2.64447  | 4.10803  | 4.27856 | 0.70935 | 1.09E-07  | 1.15E-06  | Up-regulated |
| NM_001267611 | GPR161         | 23432  | 1.016    | 0.737689 | 1.87697  | 1.28781 | 0.70841 | 0.01091   | 0.0398656 | Up-regulated |
| NM_001127398 | ERLEC1         | 27248  | 8.14593  | 5.67426  | 10.711   | 12.9807 | 0.70762 | 0.001065  | 0.0053963 | Up-regulated |
| NM_005318    | H1FO           | 3005   | 198.096  | 186.313  | 318.887  | 307.446 | 0.70744 | 5.46E-54  | 5.40E-52  | Up-regulated |
| NM_016642    | SPTBN5         | 51332  | 0.46727  | 0.677504 | 0.975981 | 1.04568 | 0.7073  | 0.0060035 | 0.0239677 | Up-regulated |
| NM_015247    | CYLD           | 1540   | 0.768974 | 0.808347 | 1.20726  | 1.53382 | 0.70666 | 0.0029928 | 0.0131365 | Up-regulated |
| NM_019119    | PCDHB9         | 56127  | 5.11038  | 5.28854  | 8.55344  | 8.55801 | 0.70654 | 1.83E-09  | 2.34E-08  | Up-regulated |
| NM_001261439 | ETV4           | 2118   | 5.02078  | 6.36626  | 10.7343  | 8.9977  | 0.70476 | 0.0027959 | 0.0124121 | Up-regulated |
| NM_152245    | CPT1B          | 1375   | 3.17432  | 5.20467  | 7.68373  | 6.98769 | 0.70412 | 0.0048085 | 0.019801  | Up-regulated |
| NM_031419    | NFKBIZ         | 64332  | 12.2077  | 12.0802  | 19.7349  | 19.868  | 0.70217 | 1.16E-18  | 3.12E-17  | Up-regulated |
| NM_153693    | HOXC6          | 3223   | 5.60731  | 6.28358  | 10.3652  | 9.5593  | 0.70102 | 9.60E-05  | 0.0006209 | Up-regulated |
| NM_006472    | TXNIP          | 10628  | 8.35698  | 6.97192  | 12.3697  | 12.9328 | 0.7007  | 9.89E-07  | 9.17E-06  | Up-regulated |
| NM_001343    | DAB2           | 1601   | 10.5347  | 11.6127  | 19.4611  | 16.8096 | 0.70036 | 2.70E-10  | 3.83E-09  | Up-regulated |
| NM_018317    | TBC1D19        | 55296  | 2.24902  | 2.14972  | 4.01211  | 3.54961 | 0.69958 | 0.0021961 | 0.0100746 | Up-regulated |
| NM_003068    | SNAI2          | 6591   | 38.3943  | 38.6605  | 63.6645  | 61.4354 | 0.69912 | 1.46E-47  | 1.54E-45  | Up-regulated |
| NM_052841    | TSSK3          | 81629  | 3.32971  | 3.38769  | 6.10712  | 5.96466 | 0.69908 | 0.0139467 | 0.0490123 | Up-regulated |
| NM_004427    | PHC2           | 1912   | 57.0516  | 59.1933  | 93.6742  | 94.6314 | 0.6985  | 4.54E-44  | 3.42E-42  | Up-regulated |
| NM_033360    | KRAS           | 3845   | 1.16139  | 1.58312  | 2.32144  | 2.42145 | 0.69829 | 0.0027633 | 0.0122844 | Up-regulated |
| NM_002373    | MAP1A          | 4130   | 1.51487  | 1.77028  | 2.86285  | 2.57831 | 0.69803 | 9.33E-06  | 7.39E-05  | Up-regulated |
| NM_012068    | ATF5           | 22809  | 9.93713  | 13.6779  | 19.7724  | 19.5603 | 0.69795 | 5.23E-05  | 0.0003572 | Up-regulated |
| NM_001257101 | PCGF5          | 84333  | 2.67169  | 2.8837   | 4.25541  | 4.91802 | 0.69781 | 1.72E-06  | 1.54E-05  | Up-regulated |
| NM_003265    | TLR3           | 7098   | 2.28928  | 2.68852  | 4.38855  | 4.11263 | 0.69689 | 0.001736  | 0.0082388 | Up-regulated |
| NM_078481    | ADGRE5         | 976    | 6.56769  | 7.19114  | 10.9475  | 11.6147 | 0.69668 | 2.30E-08  | 2.61E-07  | Up-regulated |
| NM_003670    | BHLHE40        | 8553   | 58.5367  | 57.4893  | 95.8305  | 91.8345 | 0.69628 | 6.59E-46  | 5.22E-44  | Up-regulated |
| NR_028323    | SLC5A6         | 8884   | 2.72854  | 2.44708  | 4.74918  | 4.04698 | 0.69608 | 0.0011467 | 0.0057557 | Up-regulated |
| NM_001001928 | PPARA          | 5465   | 1.8297   | 1.34737  | 2.24787  | 3.19783 | 0.69573 | 0.0023435 | 0.0106537 | Up-regulated |
| NM_182764    | ELMO2          | 63916  | 1.33863  | 2.08125  | 2.93226  | 3.13391 | 0.69432 | 0.0100858 | 0.0373034 | Up-regulated |
| NM_006902    | PRRX1          | 5396   | 17.8697  | 16.527   | 27.5611  | 28.1478 | 0.69361 | 4.86E-21  | 1.51E-19  | Up-regulated |
| NM_014786    | ARHGEF17       | 9828   | 5.76008  | 6.73186  | 10.2901  | 10.028  | 0.69331 | 2.24E-11  | 3.47E-10  | Up-regulated |
| NM_003564    | TAGLN2         | 8407   | 216.669  | 203.737  | 338.381  | 339.725 | 0.69314 | 1.32E-50  | 1.20E-48  | Up-regulated |
| NM_012408    | ZMYND8         | 23613  | 2.1606   | 3.05668  | 5.08174  | 3.83313 | 0.69202 | 0.0029683 | 0.0130477 | Up-regulated |
| NM_005534    | nma transduc   | 3460   | 49.2431  | 44.426   | 74.5457  | 76.8161 | 0.69143 | 2.23E-21  | 7.02E-20  | Up-regulated |
| NM_138766    | PAM            | 5066   | 2.97666  | 3.57111  | 6.01989  | 4.88264 | 0.69068 | 0.0001526 | 0.0009456 | Up-regulated |
| NM_032789    | erase family r | 84875  | 69.1279  | 68.5697  | 110.808  | 110.866 | 0.6905  | 2.86E-74  | 4.44E-72  | Up-regulated |
| NM_002507    | NGFR           | 4804   | 113.553  | 113.856  | 186.499  | 179.408 | 0.69003 | 3.56E-74  | 5.40E-72  | Up-regulated |
| NM_012121    | CDC42EP4       | 23580  | 19.7588  | 19.0538  | 32.0893  | 30.6345 | 0.68981 | 1.62E-19  | 4.66E-18  | Up-regulated |

|              |             |        |         |          |         |         |         |           |           |              |
|--------------|-------------|--------|---------|----------|---------|---------|---------|-----------|-----------|--------------|
| NM_018325    | C9orf72     | 203228 | 1.85365 | 1.88954  | 3.59931 | 2.89676 | 0.68922 | 0.0059744 | 0.0238565 | Up-regulated |
| NM_014950    | ZBTB1       | 22890  | 1.86021 | 2.38596  | 3.58619 | 3.62622 | 0.6889  | 0.0016328 | 0.0078071 | Up-regulated |
| NM_001146255 | PODNL1      | 79883  | 1.52674 | 1.43729  | 2.91082 | 2.38003 | 0.68864 | 0.0132725 | 0.0470236 | Up-regulated |
| NM_080430    | SELENOM     | 140606 | 73.5991 | 65.0854  | 111.559 | 112.836 | 0.68452 | 2.63E-09  | 3.33E-08  | Up-regulated |
| NM_001256486 | GOLGB1      | 2804   | 2.08629 | 1.08159  | 3.08323 | 2.46922 | 0.68431 | 0.0108116 | 0.0395667 | Up-regulated |
| NM_002856    | NECTIN2     | 5819   | 37.2391 | 37.7731  | 65.5721 | 55.5281 | 0.68427 | 5.54E-12  | 9.06E-11  | Up-regulated |
| NM_001184940 | FAM219A     | 203259 | 8.56465 | 8.18992  | 17.1483 | 10.8719 | 0.68268 | 0.0009329 | 0.0048087 | Up-regulated |
| NM_001136528 | SERPINE2    | 5270   | 795.707 | 816.797  | 1280.28 | 1298.56 | 0.68215 | 1.35E-115 | 3.40E-113 | Up-regulated |
| NM_001243726 | TEX264      | 51368  | 33.9217 | 47.9858  | 69.6021 | 64.7034 | 0.68182 | 2.96E-05  | 0.0002118 | Up-regulated |
| NM_006729    | DIAPH2      | 1730   | 3.77687 | 3.41221  | 6.19255 | 5.53697 | 0.68138 | 4.93E-06  | 4.11E-05  | Up-regulated |
| NM_002421    | MMP1        | 4312   | 16.5864 | 19.0074  | 27.707  | 29.8902 | 0.68081 | 7.25E-09  | 8.77E-08  | Up-regulated |
| NM_001144875 | DOK3        | 79930  | 1.8803  | 2.17709  | 3.39534 | 3.68588 | 0.68026 | 0.0124254 | 0.0445014 | Up-regulated |
| NR_111983    | CASP8       | 841    | 2.10014 | 2.65614  | 3.78296 | 4.36113 | 0.68008 | 0.0046739 | 0.019309  | Up-regulated |
| NM_032875    | FBXL20      | 84961  | 2.01633 | 2.34613  | 3.29437 | 3.82421 | 0.68006 | 5.32E-06  | 4.42E-05  | Up-regulated |
| NM_017664    | ANKRD10     | 55608  | 19.621  | 19.6501  | 30.844  | 32.208  | 0.67988 | 1.80E-16  | 4.21E-15  | Up-regulated |
| NM_024599    | RHBDF2      | 79651  | 12.0463 | 12.3066  | 21.0629 | 18.2011 | 0.67867 | 4.56E-10  | 6.29E-09  | Up-regulated |
| NM_001111036 | ACP5        | 54     | 31.5644 | 29.4364  | 49.2863 | 48.6195 | 0.67832 | 4.12E-14  | 8.21E-13  | Up-regulated |
| NM_001300826 | RNF19B      | 127544 | 11.1545 | 12.6193  | 18.6445 | 19.7187 | 0.67793 | 7.36E-09  | 8.90E-08  | Up-regulated |
| NM_014397    | NEK6        | 10783  | 14.7576 | 15.4926  | 23.753  | 24.8342 | 0.67792 | 7.63E-13  | 1.35E-11  | Up-regulated |
| NM_001282142 | TFE3        | 7030   | 7.50391 | 7.06037  | 10.8305 | 12.8432 | 0.67778 | 1.62E-06  | 1.46E-05  | Up-regulated |
| NM_001145524 | YPEL3       | 83719  | 66.6988 | 60.5794  | 103.911 | 100.255 | 0.67734 | 4.91E-13  | 8.87E-12  | Up-regulated |
| NM_001012279 | SOGA3       | 387104 | 0.63525 | 0.603006 | 1.02781 | 1.04161 | 0.67515 | 0.0012588 | 0.0062554 | Up-regulated |
| NM_198291    | SRC         | 6714   | 32.5429 | 32.822   | 53.5262 | 50.707  | 0.67492 | 1.87E-33  | 1.02E-31  | Up-regulated |
| NM_001003795 | GTF2IRD2B   | 389524 | 1.80241 | 1.80789  | 3.3154  | 2.81433 | 0.67478 | 0.0045301 | 0.0188086 | Up-regulated |
| NM_001164755 | ASPH        | 444    | 3.67022 | 3.19526  | 6.1155  | 5.20077 | 0.67379 | 0.0003462 | 0.0019811 | Up-regulated |
| NM_014819    | PIA2        | 9867   | 19.3679 | 19.3207  | 29.1729 | 32.5393 | 0.67163 | 2.00E-18  | 5.30E-17  | Up-regulated |
| NM_183048    | ZMYND8      | 23613  | 2.45166 | 2.83549  | 4.38693 | 4.22919 | 0.67116 | 5.89E-05  | 0.0003971 | Up-regulated |
| NM_005233    | EPHA3       | 2042   | 20.3419 | 19.6865  | 30.8861 | 32.7885 | 0.67053 | 9.10E-29  | 4.21E-27  | Up-regulated |
| NM_018933    | PCDHB13     | 56123  | 2.27779 | 2.11666  | 3.70417 | 3.61982 | 0.67019 | 0.0015728 | 0.0075678 | Up-regulated |
| NM_001113547 | LIMA1       | 51474  | 15.1339 | 15.6532  | 25.239  | 23.8263 | 0.66985 | 9.31E-17  | 2.21E-15  | Up-regulated |
| NM_001308155 | GOLIM4      | 27333  | 5.18621 | 4.94243  | 7.10125 | 9.44398 | 0.66978 | 0.0001375 | 0.000862  | Up-regulated |
| NM_183376    | ARRDC4      | 91947  | 3.38341 | 2.86532  | 5.05426 | 5.13308 | 0.66862 | 0.0001393 | 0.0008723 | Up-regulated |
| NM_144666    | DNHD1       | 144132 | 3.58715 | 4.06108  | 6.01858 | 6.17795 | 0.66811 | 1.57E-13  | 2.96E-12  | Up-regulated |
| NM_058229    | FBXO32      | 114907 | 11.3063 | 10.8362  | 17.1059 | 18.0951 | 0.66787 | 2.01E-21  | 6.37E-20  | Up-regulated |
| NM_001114635 | PLAG1       | 5324   | 1.19722 | 0.904906 | 1.64894 | 1.9176  | 0.66616 | 0.0062894 | 0.0249327 | Up-regulated |
| NM_001139457 | BCAP31      | 10134  | 30.4013 | 34.3216  | 54.1548 | 49.0344 | 0.66545 | 9.77E-11  | 1.44E-09  | Up-regulated |
| NM_145296    | CADM4       | 199731 | 103.468 | 104.706  | 169.312 | 160.199 | 0.6654  | 3.90E-42  | 2.79E-40  | Up-regulated |
| NM_015227    | POFUT2      | 23275  | 1.39478 | 1.85305  | 2.49949 | 2.97278 | 0.66516 | 0.0062792 | 0.0249067 | Up-regulated |
| NM_001039481 | ETNK1       | 55500  | 8.786   | 10.4178  | 17.2526 | 15.1585 | 0.66477 | 0.006056  | 0.0241452 | Up-regulated |
| NM_015326    | SRGAP2      | 23380  | 11.1802 | 11.6402  | 18.6292 | 17.5497 | 0.66368 | 4.02E-19  | 1.12E-17  | Up-regulated |
| NM_002145    | HOXB2       | 3212   | 11.4162 | 11.7992  | 19.88   | 17.5389 | 0.66328 | 1.47E-05  | 0.0001118 | Up-regulated |
| NR_045697    | RICKLE2-AS1 | 1E+08  | 1.53534 | 1.48588  | 2.39664 | 2.5219  | 0.66298 | 0.0003164 | 0.0018247 | Up-regulated |
| NM_001098833 | ATXN7L3     | 56970  | 20.8305 | 20.04    | 31.8732 | 32.8325 | 0.66271 | 1.69E-22  | 5.66E-21  | Up-regulated |
| NM_005904    | SMAD7       | 4092   | 5.13302 | 6.97099  | 9.43388 | 10.3559 | 0.66259 | 0.0004318 | 0.0024145 | Up-regulated |
| NM_001317008 | S100A16     | 140576 | 19.3658 | 20.2978  | 34.3738 | 29.4548 | 0.66142 | 1.18E-05  | 9.14E-05  | Up-regulated |
| NM_001318119 | SEC31A      | 22872  | 3.87353 | 5.82353  | 9.12292 | 6.99911 | 0.66106 | 0.003116  | 0.0135845 | Up-regulated |
| NM_001242488 | ZSWIM8      | 23053  | 2.46388 | 2.30154  | 3.90089 | 3.78333 | 0.66069 | 1.71E-05  | 0.0001281 | Up-regulated |
| NM_020795    | NLGN2       | 57555  | 47.7149 | 51.7312  | 81.199  | 75.8181 | 0.65943 | 8.96E-26  | 3.64E-24  | Up-regulated |
| NM_000202    | IDS         | 3423   | 9.11615 | 11.1799  | 15.9164 | 16.3528 | 0.65914 | 9.68E-10  | 1.28E-08  | Up-regulated |
| NM_014339    | IL17RA      | 23765  | 2.5417  | 2.62846  | 3.98304 | 4.27279 | 0.65889 | 8.20E-08  | 8.75E-07  | Up-regulated |
| NM_152594    | SPRED1      | 161742 | 7.60005 | 8.13365  | 12.6336 | 12.2385 | 0.65862 | 1.08E-16  | 2.56E-15  | Up-regulated |
| NM_004732    | KCNAB3      | 9196   | 2.3786  | 3.43403  | 4.85189 | 5.04752 | 0.65851 | 0.0113913 | 0.0413553 | Up-regulated |
| NR_024586    | head)(KMT2  | 1E+08  | 2.57357 | 2.81953  | 4.67265 | 4.13116 | 0.65848 | 0.000924  | 0.0047716 | Up-regulated |
| NM_033529    | CDK11A      | 728642 | 2.88492 | 2.63589  | 4.64916 | 4.41252 | 0.65834 | 0.0011901 | 0.0059466 | Up-regulated |
| NM_016588    | NRN1        | 51299  | 10.2448 | 10.6199  | 15.7055 | 17.6772 | 0.65813 | 2.65E-06  | 2.30E-05  | Up-regulated |
| NM_016621    | PHF21A      | 51317  | 2.24763 | 3.07487  | 4.94959 | 3.79462 | 0.65788 | 0.0016938 | 0.0080647 | Up-regulated |
| NM_206833    | CTXN1       | 404217 | 38.5786 | 40.6814  | 64.0341 | 61.2645 | 0.65737 | 6.19E-13  | 1.11E-11  | Up-regulated |
| NM_001276289 | PRKARIA     | 5573   | 15.1816 | 13.3187  | 20.0451 | 25.4627 | 0.65653 | 1.03E-06  | 9.55E-06  | Up-regulated |
| NM_014035    | SNX24       | 28966  | 3.05102 | 3.14378  | 4.72972 | 5.6962  | 0.65565 | 0.007454  | 0.0289022 | Up-regulated |
| NM_130853    | PTPRS       | 5802   | 8.5025  | 6.07589  | 12.2539 | 11.1681 | 0.65446 | 5.61E-05  | 0.0003804 | Up-regulated |
| NM_005619    | RTN2        | 6253   | 3.63984 | 3.26936  | 6.21853 | 5.19305 | 0.65019 | 0.0047053 | 0.0194347 | Up-regulated |
| NR_036518    | C17orf62    | 79415  | 8.47942 | 6.41638  | 12.8233 | 11.4026 | 0.6495  | 0.0013059 | 0.006461  | Up-regulated |
| NM_001330323 | HOXB3       | 3213   | 2.84904 | 4.21744  | 6.37063 | 5.45128 | 0.64934 | 0.009395  | 0.0351019 | Up-regulated |
| NM_181718    | ASPHD1      | 253982 | 23.0419 | 24.9734  | 39.6006 | 36.2187 | 0.64928 | 1.63E-08  | 1.89E-07  | Up-regulated |
| NM_001330245 | SLC39A13    | 91252  | 12.834  | 15.6643  | 21.0583 | 24.2987 | 0.6485  | 7.90E-06  | 6.35E-05  | Up-regulated |
| NM_001297553 | CHD4        | 1108   | 8.50451 | 11.0546  | 16.2036 | 14.8508 | 0.64847 | 1.42E-06  | 1.29E-05  | Up-regulated |
| NM_001128226 | DIS3        | 22894  | 1.34229 | 1.09741  | 2.00029 | 1.97817 | 0.64723 | 0.0016231 | 0.0077746 | Up-regulated |
| NM_017947    | MOCOS       | 55034  | 4.40495 | 4.19573  | 7.24169 | 6.55423 | 0.64526 | 0.0003315 | 0.0019041 | Up-regulated |
| NM_014647    | KIAA0430    | 9665   | 2.10138 | 3.5644   | 4.23585 | 5.14062 | 0.64422 | 0.0067822 | 0.0266313 | Up-regulated |
| NR_120434    | OC10050706  | 1E+08  | 4.10021 | 4.04372  | 6.65282 | 6.87663 | 0.64345 | 0.009035  | 0.0339492 | Up-regulated |
| NM_001271466 | ARMC9       | 80210  | 7.19153 | 6.95081  | 10.9832 | 11.1423 | 0.6434  | 7.63E-16  | 1.72E-14  | Up-regulated |
| NM_001040455 | SIDT2       | 51092  | 5.42244 | 6.06004  | 8.98369 | 9.13948 | 0.64262 | 6.72E-07  | 6.38E-06  | Up-regulated |
| NM_017912    | HERC6       | 55008  | 6.45898 | 6.49013  | 9.77919 | 10.5986 | 0.64171 | 7.21E-08  | 7.74E-07  | Up-regulated |
| NM_006702    | PNPLA6      | 10908  | 13.7998 | 14.654   | 22.5391 | 21.9039 | 0.64161 | 1.55E-17  | 3.90E-16  | Up-regulated |
| NM_001118890 | GLRX        | 2745   | 33.2305 | 33.6459  | 51.1423 | 53.7947 | 0.6411  | 3.59E-09  | 4.48E-08  | Up-regulated |
| NM_001033056 | GLUL        | 2752   | 4.45526 | 6.9327   | 10.0767 | 8.32722 | 0.64093 | 0.0012991 | 0.0064323 | Up-regulated |
| NR_018932    | PCDHB12     | 56124  | 2.88581 | 3.64583  | 4.94178 | 5.64536 | 0.64089 | 0.0020356 | 0.0094516 | Up-regulated |
| NR_028038    | GATS        | 352954 | 2.14632 | 2.18428  | 3.59491 | 3.4077  | 0.64028 | 0.0012297 | 0.0061235 | Up-regulated |
| NM_004172    | SLC1A3      | 6507   | 2.24011 | 2.37487  | 3.80978 | 3.61568 | 0.64027 | 0.000774  | 0.0040842 | Up-regulated |
| NM_001627    | ALCAM       | 214    | 8.41868 | 6.8528   | 11.5844 | 12.4624 | 0.64018 | 8.33E-07  | 7.82E-06  | Up-regulated |
| NM_182648    | BAZ1A       | 11177  | 1.32307 | 1.61035  | 2.18856 | 2.59503 | 0.64    | 0.0040159 | 0.0169947 | Up-regulated |
| NM_024809    | TCTN2       | 79867  | 3.23324 | 2.88909  | 5.33081 | 4.62204 | 0.63924 | 0.0026773 | 0.011966  | Up-regulated |
| NM_004228    | CYTH2       | 9266   | 6.65798 | 7.93693  | 10.7481 | 12.2498 | 0.63818 | 2.65E-06  | 2.30E-05  | Up-regulated |
| NR_004858    | POFUT2      | 23275  | 2.81584 | 3.76526  | 4.56513 | 6.38158 | 0.63783 | 0.0113682 | 0.0412874 | Up-regulated |

|              |                |        |          |          |          |          |         |           |           |              |
|--------------|----------------|--------|----------|----------|----------|----------|---------|-----------|-----------|--------------|
| NM_001136017 | CCND3          | 896    | 9.04976  | 7.75865  | 13.2093  | 13.4181  | 0.63644 | 4.63E-05  | 0.0003185 | Up-regulated |
| NM_001017974 | P4HA2          | 8974   | 27.4272  | 25.0183  | 39.1482  | 42.6379  | 0.63569 | 3.51E-11  | 5.37E-10  | Up-regulated |
| NM_032437    | EFCAB7         | 84455  | 8.26163  | 8.36608  | 13.5261  | 12.6181  | 0.63486 | 2.81E-06  | 2.43E-05  | Up-regulated |
| NM_002178    | IGFBP6         | 3489   | 25.9157  | 25.4493  | 41.5916  | 39.0373  | 0.63408 | 2.90E-06  | 2.51E-05  | Up-regulated |
| NM_030882    | APOL2          | 23780  | 20.5293  | 19.5235  | 32.5519  | 29.7872  | 0.63362 | 7.36E-12  | 1.19E-10  | Up-regulated |
| NR_037941    | STX16          | 8675   | 4.03063  | 6.10089  | 7.84206  | 8.44535  | 0.63155 | 0.0018289 | 0.0086069 | Up-regulated |
| NM_032421    | CLIP2          | 7461   | 16.2028  | 16.2984  | 24.9113  | 25.3735  | 0.63098 | 1.70E-26  | 7.24E-25  | Up-regulated |
| NM_001346590 | M_00134659     | NA     | 9.8273   | 9.58229  | 15.0776  | 15.1069  | 0.6306  | 1.79E-09  | 2.29E-08  | Up-regulated |
| NM_001356    | DDX3X          | 1654   | 2.86691  | 4.53869  | 5.85848  | 6.12252  | 0.63031 | 0.0037354 | 0.0159598 | Up-regulated |
| NM_203344    | SERTAD3        | 29946  | 13.0289  | 12.0779  | 19.9498  | 19.5076  | 0.62998 | 3.42E-05  | 0.000242  | Up-regulated |
| NM_002648    | PIMI1          | 5292   | 3.04936  | 2.70852  | 4.91914  | 4.41638  | 0.62966 | 0.0048238 | 0.0198467 | Up-regulated |
| NM_001330332 | CD70           | 970    | 2.58395  | 2.50579  | 4.1107   | 4.2317   | 0.62955 | 0.0085047 | 0.0323124 | Up-regulated |
| NM_022750    | erace family r | 64761  | 31.4668  | 32.5139  | 49.2589  | 49.5579  | 0.62917 | 5.50E-32  | 2.85E-30  | Up-regulated |
| NM_002772    | TMPRSS15       | 5651   | 1.59263  | 1.49446  | 2.61216  | 2.43775  | 0.62914 | 0.0081315 | 0.0311172 | Up-regulated |
| NM_018931    | PCDHB11        | 56125  | 2.03233  | 2.11482  | 3.35584  | 3.39156  | 0.62911 | 0.0053507 | 0.0217663 | Up-regulated |
| NM_001024845 | SLC6A9         | 6536   | 10.983   | 10.6906  | 16.1143  | 17.5611  | 0.62872 | 1.76E-09  | 2.26E-08  | Up-regulated |
| NM_198859    | PRICKLE2       | 166336 | 2.54814  | 2.47267  | 4.00276  | 3.83155  | 0.62785 | 4.85E-07  | 4.70E-06  | Up-regulated |
| NM_182691    | SRPK2          | 6733   | 5.18844  | 6.7294   | 9.77482  | 9.01264  | 0.6272  | 0.000172  | 0.0010505 | Up-regulated |
| NM_006216    | SERPINE2       | 5270   | 245.018  | 227.505  | 367.668  | 360.254  | 0.62668 | 5.08E-41  | 3.52E-39  | Up-regulated |
| NM_144975    | SLFN5          | 162394 | 10.9459  | 12.0373  | 17.5917  | 17.9795  | 0.62665 | 5.43E-13  | 9.76E-12  | Up-regulated |
| NM_017550    | MIER2          | 54531  | 23.133   | 17.3431  | 35.9674  | 27.9033  | 0.62605 | 0.000214  | 0.0012812 | Up-regulated |
| NM_152346    | SLC43A2        | 124935 | 2.86293  | 3.60935  | 5.09567  | 5.0384   | 0.62565 | 1.95E-05  | 0.0001447 | Up-regulated |
| NM_001330542 | HEXDC          | 284004 | 6.07285  | 5.30662  | 9.45783  | 8.59028  | 0.62541 | 0.0007681 | 0.0040555 | Up-regulated |
| NM_021035    | ZNFX1          | 57169  | 10.9368  | 10.7521  | 17.053   | 16.396   | 0.62527 | 2.86E-22  | 9.42E-21  | Up-regulated |
| NM_183047    | ZMYND8         | 23613  | 7.17173  | 7.17403  | 11.7927  | 10.4718  | 0.62516 | 3.99E-09  | 4.95E-08  | Up-regulated |
| NM_004644    | AP3B2          | 8120   | 2.5779   | 3.96836  | 5.53864  | 5.12563  | 0.62499 | 0.0083706 | 0.0318981 | Up-regulated |
| NM_003687    | PDLIM4         | 8572   | 64.7473  | 62.3838  | 98.756   | 96.9171  | 0.62494 | 1.32E-33  | 7.21E-32  | Up-regulated |
| NM_004907    | IER2           | 9592   | 69.025   | 69.0713  | 108.819  | 103.72   | 0.62443 | 4.19E-30  | 2.01E-28  | Up-regulated |
| NM_021163    | RBAK           | 57786  | 3.03832  | 3.46528  | 5.35479  | 4.82566  | 0.6243  | 1.31E-05  | 0.0001009 | Up-regulated |
| NM_001278478 | RUNX2          | 860    | 1.63703  | 1.88851  | 2.7025   | 2.92967  | 0.62403 | 0.0020113 | 0.0093482 | Up-regulated |
| NM_021202    | TP53INP2       | 58476  | 4.31645  | 5.46437  | 7.73146  | 7.62164  | 0.6233  | 0.0001177 | 0.0007465 | Up-regulated |
| NM_017752    | TBC1D8B        | 54885  | 1.46224  | 1.69431  | 2.38633  | 2.6596   | 0.62267 | 0.0025855 | 0.0116129 | Up-regulated |
| NM_001964    | EGR1           | 1958   | 44.6593  | 45.4879  | 69.6521  | 68.8725  | 0.62266 | 2.17E-36  | 1.27E-34  | Up-regulated |
| NM_032430    | BRSK1          | 84446  | 16.5907  | 16.8249  | 26.2837  | 25.2235  | 0.6222  | 1.85E-14  | 3.78E-13  | Up-regulated |
| NM_014607    | UBXN4          | 23190  | 24.0207  | 23.7286  | 36.161   | 37.2444  | 0.62199 | 4.77E-26  | 1.96E-24  | Up-regulated |
| NM_024827    | HDAC11         | 79885  | 6.14852  | 6.92147  | 10.0368  | 10.3766  | 0.62187 | 1.51E-05  | 0.0001144 | Up-regulated |
| NM_001256488 | GOLGB1         | 2804   | 1.73245  | 3.06364  | 3.7916   | 3.98659  | 0.6213  | 0.0077986 | 0.0300113 | Up-regulated |
| NM_001317812 | SLC25A37       | 51312  | 7.23521  | 7.43913  | 10.758   | 11.9309  | 0.62121 | 1.19E-09  | 1.56E-08  | Up-regulated |
| NM_001129    | AEBP1          | 165    | 54.5908  | 59.1252  | 88.6735  | 86.0254  | 0.62113 | 1.01E-28  | 4.64E-27  | Up-regulated |
| NM_015348    | TMEM131        | 23505  | 11.281   | 12.256   | 18.298   | 17.9083  | 0.62045 | 1.66E-17  | 4.15E-16  | Up-regulated |
| NM_001006616 | TSPAN17        | 26262  | 5.32769  | 4.15587  | 7.24367  | 7.84459  | 0.6202  | 0.0021075 | 0.0097336 | Up-regulated |
| NM_025092    | PGGHG          | 80162  | 9.20505  | 10.2347  | 14.9427  | 15.1278  | 0.61989 | 2.52E-08  | 2.86E-07  | Up-regulated |
| NM_001288814 | MROH1          | 727957 | 3.44855  | 4.83435  | 5.87535  | 7.3159   | 0.61982 | 0.0022562 | 0.0103134 | Up-regulated |
| NM_205847    | GMPPA          | 29926  | 8.44285  | 8.93146  | 13.2045  | 13.913   | 0.61857 | 7.42E-05  | 0.0004908 | Up-regulated |
| NM_006526    | ZNF217         | 7764   | 12.9561  | 13.4778  | 20.4316  | 20.1422  | 0.61836 | 1.56E-20  | 4.78E-19  | Up-regulated |
| NM_021904    | GABBR1         | 2550   | 1.50867  | 1.85118  | 2.6514   | 2.75886  | 0.6182  | 0.0077338 | 0.0298098 | Up-regulated |
| NM_001321728 | HTRA2          | 27429  | 2.4907   | 2.99298  | 4.67739  | 4.23798  | 0.61803 | 0.0115968 | 0.0419392 | Up-regulated |
| NM_019120    | PCDHB8         | 56128  | 5.54873  | 6.76571  | 9.75893  | 9.5393   | 0.61763 | 0.0002263 | 0.001344  | Up-regulated |
| NM_020529    | NFKBIA         | 4792   | 13.3704  | 12.2     | 19.2994  | 20.4752  | 0.61754 | 2.11E-05  | 0.0001559 | Up-regulated |
| NM_016315    | GULP1          | 51454  | 3.99106  | 5.28087  | 6.75869  | 7.96237  | 0.61688 | 0.0017751 | 0.0083891 | Up-regulated |
| NM_147782    | CTS5           | 1508   | 30.9422  | 32.6308  | 51.6123  | 45.9093  | 0.61553 | 5.58E-15  | 1.18E-13  | Up-regulated |
| NM_001122670 | PHKA1          | 5255   | 4.03494  | 3.19394  | 6.09407  | 5.22429  | 0.61548 | 0.0002589 | 0.0015199 | Up-regulated |
| NM_001286566 | KIAA0513       | 9764   | 1.16325  | 1.4955   | 2.04882  | 2.17586  | 0.61534 | 0.0036988 | 0.0158326 | Up-regulated |
| NM_032960    | MAPKAPK2       | 9261   | 29.622   | 29.5686  | 45.1336  | 45.4507  | 0.6153  | 1.79E-24  | 6.76E-23  | Up-regulated |
| NM_004872    | TMEM59         | 9528   | 13.4182  | 14.0966  | 20.0385  | 22.1382  | 0.61491 | 2.10E-15  | 4.62E-14  | Up-regulated |
| NM_001288616 | TTC23          | 64927  | 2.88426  | 2.30979  | 3.98031  | 4.30712  | 0.61311 | 0.005713  | 0.022976  | Up-regulated |
| NM_001300958 | BSDC1          | 55108  | 1.32625  | 1.41243  | 2.51066  | 1.92872  | 0.61289 | 0.0123559 | 0.0443103 | Up-regulated |
| NM_002971    | SATB1          | 6304   | 1.17336  | 1.2231   | 1.80141  | 1.98247  | 0.61238 | 0.0015645 | 0.0075337 | Up-regulated |
| NM_024698    | SLC25A22       | 79751  | 13.4529  | 12.1411  | 22.0182  | 17.634   | 0.61201 | 2.31E-05  | 0.0001694 | Up-regulated |
| NM_001271870 | SRGAP2B        | 647135 | 6.67409  | 7.36111  | 11.0623  | 10.4818  | 0.61164 | 7.99E-10  | 1.07E-08  | Up-regulated |
| NM_020957    | PCDHB16        | 57717  | 7.2561   | 8.41464  | 12.2136  | 11.8967  | 0.61069 | 1.01E-07  | 1.07E-06  | Up-regulated |
| NM_006315    | PCGF3          | 10336  | 7.76611  | 7.91954  | 11.8031  | 12.1696  | 0.60954 | 8.88E-14  | 1.71E-12  | Up-regulated |
| NM_005013    | NUCB2          | 4925   | 29.087   | 27.4204  | 41.8676  | 44.6507  | 0.60912 | 3.30E-10  | 4.62E-09  | Up-regulated |
| NM_001243925 | MAPKAPK3       | 7867   | 11.3039  | 11.9023  | 22.3999  | 14.2988  | 0.60875 | 0.0034154 | 0.0147509 | Up-regulated |
| NM_001042412 | CYLD           | 1540   | 3.27739  | 1.99373  | 4.48238  | 3.93894  | 0.60815 | 0.006932  | 0.0271205 | Up-regulated |
| NM_024552    | CERS4          | 79603  | 5.69454  | 5.07283  | 8.84885  | 8.15993  | 0.6075  | 0.0031327 | 0.013638  | Up-regulated |
| NM_080680    | COL11A2        | 1302   | 5.02847  | 6.00826  | 10.2735  | 7.05432  | 0.60705 | 0.001463  | 0.0071146 | Up-regulated |
| NM_001304815 | CIC            | 23152  | 6.92744  | 8.3282   | 12.6165  | 10.8232  | 0.60634 | 1.06E-06  | 9.83E-06  | Up-regulated |
| NM_006332    | IFI30          | 10437  | 88.9897  | 87.0092  | 132.592  | 135.04   | 0.60622 | 4.05E-19  | 1.13E-17  | Up-regulated |
| NM_017412    | FZD3           | 7976   | 0.606073 | 0.592458 | 0.939935 | 0.946528 | 0.60541 | 0.0023553 | 0.0106985 | Up-regulated |
| NM_001217    | CA11           | 770    | 17.7782  | 17.5042  | 26.9872  | 26.9852  | 0.60539 | 6.70E-09  | 8.14E-08  | Up-regulated |
| NM_002941    | ROBO1          | 6091   | 2.72352  | 3.15669  | 5.58575  | 3.72464  | 0.60473 | 0.0049308 | 0.0202436 | Up-regulated |
| NM_022767    | AEN            | 64782  | 30.1178  | 29.4039  | 44.9797  | 45.393   | 0.60452 | 3.91E-24  | 1.44E-22  | Up-regulated |
| NM_015054    | UHRF1BP1L      | 23074  | 3.90622  | 3.36633  | 5.76528  | 5.45283  | 0.60423 | 4.43E-05  | 0.0003058 | Up-regulated |
| NM_006516    | SLC2A1         | 6513   | 38.0177  | 39.1849  | 60.4907  | 56.6709  | 0.60324 | 3.48E-24  | 1.28E-22  | Up-regulated |
| NM_021999    | ITM2B          | 9445   | 66.5039  | 67.4225  | 98.5409  | 104.652  | 0.60306 | 1.76E-23  | 6.25E-22  | Up-regulated |
| NM_001308002 | MEF2C          | 4208   | 6.69886  | 6.79911  | 8.72485  | 12.1697  | 0.60302 | 0.0002558 | 0.0015044 | Up-regulated |
| NM_001017962 | P4HA1          | 5033   | 11.3047  | 14.9725  | 20.9875  | 19.5642  | 0.60274 | 9.03E-05  | 0.0005857 | Up-regulated |
| NM_001318338 | FRMD4A         | 55691  | 17.3191  | 17.0308  | 26.8835  | 25.2488  | 0.60272 | 2.11E-21  | 6.66E-20  | Up-regulated |
| NM_018833    | TAP2           | 6891   | 21.7793  | 22.8782  | 37.0608  | 31.1876  | 0.60268 | 7.19E-08  | 7.72E-07  | Up-regulated |
| NM_001317138 | PFKFB4         | 5210   | 7.1608   | 6.43607  | 9.79479  | 11.088   | 0.60249 | 7.98E-06  | 6.41E-05  | Up-regulated |
| NM_006570    | RRAGA          | 10670  | 53.881   | 46.8456  | 76.6323  | 76.5705  | 0.60192 | 1.32E-11  | 2.09E-10  | Up-regulated |
| NM_182923    | KLC1           | 3831   | 13.3428  | 14.5951  | 20.0936  | 22.6538  | 0.60133 | 8.25E-07  | 7.76E-06  | Up-regulated |
| NM_001008390 | CGGBP1         | 8545   | 5.73824  | 4.491    | 7.11475  | 8.80431  | 0.60126 | 0.0008654 | 0.0045066 | Up-regulated |



|              |                |        |         |         |         |         |         |           |           |              |
|--------------|----------------|--------|---------|---------|---------|---------|---------|-----------|-----------|--------------|
| NM_032268    | ZNRF1          | 84937  | 9.74009 | 8.63052 | 13.9687 | 14.0216 | 0.60121 | 1.83E-09  | 2.34E-08  | Up-regulated |
| NM_001272013 | ITPRIP         | 85450  | 3.03191 | 3.05257 | 4.59938 | 4.71431 | 0.6008  | 2.09E-06  | 1.85E-05  | Up-regulated |
| NM_001297599 | MIER3          | 166968 | 1.87574 | 1.78858 | 2.84196 | 2.8692  | 0.60061 | 0.0015396 | 0.0074284 | Up-regulated |
| NM_173872    | CLCN3          | 1182   | 2.64751 | 3.71826 | 5.36296 | 4.59186 | 0.59928 | 0.0025403 | 0.0114343 | Up-regulated |
| NM_004409    | DMPK           | 1760   | 6.46413 | 5.54079 | 8.08995 | 10.6786 | 0.59915 | 0.0022737 | 0.0103734 | Up-regulated |
| NM_001320836 | N4BP2L2        | 10443  | 4.08565 | 4.03564 | 6.31951 | 6.14232 | 0.59904 | 1.85E-05  | 0.0001379 | Up-regulated |
| NM_130807    | MOB3A          | 126308 | 11.4408 | 11.1164 | 16.9021 | 17.3471 | 0.59865 | 2.04E-10  | 2.93E-09  | Up-regulated |
| NR_026981    | RPL23AP82      | 284942 | 10.1799 | 10.3808 | 15.9356 | 15.7391 | 0.59821 | 0.0001542 | 0.0009543 | Up-regulated |
| NM_006732    | FOSB           | 2354   | 2.547   | 2.60602 | 4.13042 | 3.89276 | 0.5972  | 0.0017743 | 0.0083874 | Up-regulated |
| NM_001143679 | GSTK1          | 373156 | 30.1745 | 30.1035 | 47.2943 | 44.1855 | 0.59614 | 3.16E-08  | 3.54E-07  | Up-regulated |
| NM_001136126 | CCND3          | 896    | 11.0986 | 10.482  | 16.6175 | 16.3197 | 0.59527 | 1.43E-05  | 0.0001093 | Up-regulated |
| NM_001308047 | PRUNE2         | 158471 | 4.1218  | 5.32858 | 7.70162 | 6.7542  | 0.59522 | 2.07E-05  | 0.0001527 | Up-regulated |
| NM_001177639 | DAG1           | 1605   | 5.33661 | 6.26881 | 8.09587 | 9.68761 | 0.595   | 4.80E-05  | 0.0003302 | Up-regulated |
| NM_014899    | RHOBTB3        | 22836  | 14.8429 | 14.1152 | 21.8323 | 21.8658 | 0.59477 | 5.01E-20  | 1.49E-18  | Up-regulated |
| NM_178006    | STARD13        | 90627  | 4.89169 | 4.73461 | 6.90814 | 7.7502  | 0.59475 | 5.68E-07  | 5.44E-06  | Up-regulated |
| NR_125361    | MORN1          | 79906  | 1.27931 | 1.5738  | 2.27507 | 2.26243 | 0.59473 | 0.0112183 | 0.0408126 | Up-regulated |
| NM_015726    | DCAF8          | 50717  | 4.8568  | 5.34353 | 8.26453 | 7.33121 | 0.59368 | 5.72E-05  | 0.0003869 | Up-regulated |
| NM_080927    | DCBLD2         | 131566 | 30.3005 | 30.039  | 44.1996 | 46.682  | 0.59362 | 2.27E-32  | 1.20E-30  | Up-regulated |
| NM_001142599 | P4HA2          | 8974   | 11.078  | 16.052  | 21.7733 | 20.2254 | 0.59346 | 0.0014491 | 0.0070743 | Up-regulated |
| NM_020651    | PELI1          | 57162  | 7.97133 | 7.32429 | 11.4433 | 11.7537 | 0.59216 | 1.54E-07  | 1.60E-06  | Up-regulated |
| NM_001289823 | FURIN          | 5045   | 37.1248 | 40.0673 | 54.9625 | 61.4918 | 0.59198 | 1.24E-14  | 2.56E-13  | Up-regulated |
| NM_001162498 | LPAR6          | 10161  | 2.96743 | 3.4347  | 4.87315 | 5.23107 | 0.59196 | 0.0083223 | 0.0317331 | Up-regulated |
| NM_032667    | BSC12          | 26580  | 10.5828 | 11.7838 | 16.9316 | 17.3512 | 0.59169 | 0.000181  | 0.0010987 | Up-regulated |
| NM_001017995 | SH3PXD2B       | 285590 | 27.2073 | 27.7996 | 41.987  | 40.711  | 0.59151 | 2.96E-41  | 2.06E-39  | Up-regulated |
| NM_006079    | CITED2         | 10370  | 40.2744 | 36.4501 | 59.2463 | 56.4622 | 0.5909  | 1.49E-12  | 2.56E-11  | Up-regulated |
| NM_145731    | SYNGR1         | 9145   | 55.6852 | 46.8772 | 77.0971 | 78.0965 | 0.59086 | 1.63E-08  | 1.88E-07  | Up-regulated |
| NM_001171132 | FAM3A          | 60343  | 5.05247 | 4.10233 | 7.49932 | 7.04462 | 0.59083 | 0.0124255 | 0.0445014 | Up-regulated |
| NM_001257207 | FGF1           | 2246   | 3.22361 | 3.23618 | 5.12724 | 4.79428 | 0.59073 | 0.0005245 | 0.0028685 | Up-regulated |
| NM_170707    | LMNA           | 4000   | 148.718 | 148.195 | 225.298 | 220.416 | 0.59057 | 2.88E-74  | 4.44E-72  | Up-regulated |
| NM_022835    | PLEKHG2        | 64857  | 6.52096 | 6.23601 | 9.83302 | 9.40027 | 0.59016 | 1.93E-12  | 3.29E-11  | Up-regulated |
| NM_152857    | WTAP           | 9589   | 5.6906  | 4.61672 | 7.92854 | 8.297   | 0.58994 | 0.0088606 | 0.0334058 | Up-regulated |
| NM_014870    | ZBTB40         | 9923   | 3.89393 | 2.60016 | 5.24435 | 4.81516 | 0.58976 | 0.0022665 | 0.0103454 | Up-regulated |
| NM_182943    | PLOD2          | 5352   | 15.7066 | 16.1287 | 22.2169 | 25.8683 | 0.58864 | 3.33E-09  | 4.17E-08  | Up-regulated |
| NM_000029    | AGT            | 183    | 2.8269  | 2.77312 | 4.26542 | 4.54843 | 0.58827 | 0.0090194 | 0.0339104 | Up-regulated |
| NM_018982    | YIPF1          | 54432  | 7.24    | 6.68565 | 10.2696 | 11.1942 | 0.58822 | 0.0009922 | 0.005077  | Up-regulated |
| NM_001291717 | PRAME          | 23532  | 3.17582 | 2.98376 | 5.22511 | 4.53523 | 0.58807 | 0.0124846 | 0.0446794 | Up-regulated |
| NM_021070    | LTBP3          | 4054   | 8.27952 | 6.35635 | 11.8975 | 10.4721 | 0.58797 | 0.0001831 | 0.0011098 | Up-regulated |
| NM_005456    | MAPK8IP1       | 9479   | 10.2063 | 9.43405 | 15.9558 | 13.855  | 0.58768 | 3.18E-06  | 2.73E-05  | Up-regulated |
| NM_004049    | BCL2A1         | 597    | 178.473 | 169.16  | 251.934 | 269.547 | 0.58739 | 3.52E-18  | 9.22E-17  | Up-regulated |
| NM_001012426 | FOXP4          | 116113 | 3.53586 | 3.78189 | 5.1972  | 5.92706 | 0.5866  | 2.63E-05  | 0.0001904 | Up-regulated |
| NR_028406    | FXYD5          | 53827  | 19.5838 | 18.9437 | 29.1758 | 29.0036 | 0.58659 | 1.17E-07  | 1.23E-06  | Up-regulated |
| NM_145057    | CDC42EP5       | 148170 | 90.1885 | 96.6629 | 140.874 | 139.523 | 0.58621 | 4.21E-14  | 8.37E-13  | Up-regulated |
| NM_033292    | CASP1          | 834    | 7.58398 | 7.62224 | 11.0179 | 12.5629 | 0.586   | 0.0043356 | 0.0181031 | Up-regulated |
| NM_001130968 | ZNF385A        | 25946  | 3.49449 | 3.73854 | 5.39482 | 5.96859 | 0.58575 | 0.0097504 | 0.0362102 | Up-regulated |
| NM_001256071 | RNF213         | 57674  | 11.2348 | 12.5345 | 17.8439 | 17.8055 | 0.58554 | 9.27E-21  | 2.86E-19  | Up-regulated |
| NM_002923    | RGS2           | 5997   | 14.0666 | 12.9166 | 19.2886 | 22.0384 | 0.58526 | 0.000376  | 0.0021306 | Up-regulated |
| NM_032476    | MRPS6          | 64968  | 163.133 | 156.735 | 238.842 | 239.698 | 0.58494 | 7.69E-27  | 3.32E-25  | Up-regulated |
| NM_001128227 | ase/N-acetylIn | 10020  | 1.41681 | 1.37203 | 2.26554 | 2.07541 | 0.5849  | 0.007475  | 0.0289705 | Up-regulated |
| NM_201413    | APP            | 351    | 118.935 | 134.385 | 192.302 | 187.381 | 0.58472 | 1.37E-19  | 3.94E-18  | Up-regulated |
| NM_001304332 | PPFIA4         | 8497   | 1.94813 | 1.7376  | 2.82836 | 2.82477 | 0.58472 | 0.0007925 | 0.0041624 | Up-regulated |
| NM_001324403 | PI15           | 51050  | 3.04304 | 3.62538 | 4.07838 | 6.35739 | 0.58355 | 0.0084153 | 0.0320301 | Up-regulated |
| NM_078471    | MYO18A         | 399687 | 15.2898 | 16.163  | 23.8758 | 23.2088 | 0.58348 | 3.55E-23  | 1.24E-21  | Up-regulated |
| NM_001334    | CTSO           | 1519   | 2.95005 | 3.00492 | 4.48076 | 4.75604 | 0.58328 | 0.0043236 | 0.018073  | Up-regulated |
| NM_030816    | ANKRD13C       | 81573  | 5.58017 | 5.01373 | 8.26733 | 7.71068 | 0.58241 | 6.32E-07  | 6.02E-06  | Up-regulated |
| NM_013943    | CLIC4          | 25932  | 106.462 | 105.927 | 155.73  | 161.283 | 0.58204 | 1.21E-61  | 1.36E-59  | Up-regulated |
| NM_015713    | RRM2B          | 50484  | 2.10925 | 2.19483 | 3.24222 | 3.37286 | 0.58177 | 0.0013119 | 0.0064854 | Up-regulated |
| NM_001097620 | TMEM184A       | 202915 | 1.1429  | 1.29389 | 1.90225 | 1.88274 | 0.58099 | 0.0071669 | 0.0279238 | Up-regulated |
| NM_001128636 | ELFN1          | 392617 | 3.51052 | 2.63168 | 4.69706 | 4.82656 | 0.58077 | 0.0054064 | 0.0219556 | Up-regulated |
| NR_024348    | head)(FBXL     | 283932 | 5.40786 | 5.28841 | 8.52826 | 7.64276 | 0.58072 | 1.91E-05  | 0.0001423 | Up-regulated |
| NM_001029884 | PLEKHG1        | 57480  | 1.07836 | 1.22929 | 1.92747 | 1.67623 | 0.58072 | 0.0072937 | 0.0283682 | Up-regulated |
| NM_002892    | ARID4A         | 5926   | 2.90179 | 3.06639 | 4.60526 | 4.43588 | 0.58026 | 4.08E-05  | 0.0002839 | Up-regulated |
| NM_001010917 | GOLGA7B        | 401647 | 6.54901 | 7.1676  | 10.9547 | 9.6787  | 0.58004 | 1.10E-07  | 1.16E-06  | Up-regulated |
| NM_001131005 | MEF2C          | 4208   | 3.92535 | 2.88419 | 5.8757  | 4.63144 | 0.57985 | 0.0039047 | 0.0165794 | Up-regulated |
| NM_021954    | GJA3           | 2700   | 5.09107 | 5.11116 | 7.62846 | 7.69911 | 0.57957 | 1.40E-07  | 1.46E-06  | Up-regulated |
| NM_005493    | RANBP9         | 10048  | 15.0855 | 16.1419 | 23.2571 | 23.4721 | 0.57935 | 2.50E-11  | 3.88E-10  | Up-regulated |
| NM_001624    | AIM1           | 202    | 6.97663 | 6.23712 | 9.69115 | 10.0989 | 0.5783  | 5.94E-10  | 8.06E-09  | Up-regulated |
| NM_002673    | PLXNB1         | 5364   | 12.0373 | 13.5156 | 19.2441 | 18.9381 | 0.57797 | 1.16E-13  | 2.20E-12  | Up-regulated |
| NM_006700    | TRAFD1         | 10906  | 11.708  | 11.0216 | 16.4624 | 17.6787 | 0.57735 | 4.26E-07  | 4.16E-06  | Up-regulated |
| NR_130944    | WDR73          | 84942  | 2.55063 | 2.40635 | 3.64924 | 3.99038 | 0.57645 | 0.0045215 | 0.0187807 | Up-regulated |
| NM_032427    | MAML2          | 84441  | 4.06499 | 4.09807 | 6.05385 | 6.17918 | 0.57601 | 3.56E-08  | 3.96E-07  | Up-regulated |
| NM_031426    | AIF1L          | 83543  | 1.92925 | 1.82979 | 2.95708 | 2.92357 | 0.57591 | 0.0136679 | 0.0482276 | Up-regulated |
| NM_001040715 | KIAA0895L      | 653319 | 5.76717 | 5.45887 | 8.54094 | 8.37188 | 0.57567 | 2.20E-05  | 0.0001615 | Up-regulated |
| NM_002514    | NOV            | 4856   | 26.5456 | 25.0858 | 37.5096 | 39.4719 | 0.57537 | 1.33E-13  | 2.52E-12  | Up-regulated |
| NM_024617    | ZCCHC6         | 79670  | 4.07665 | 4.08858 | 5.81067 | 6.48021 | 0.57532 | 7.71E-06  | 6.21E-05  | Up-regulated |
| NM_005393    | PLXNB3         | 5365   | 14.1198 | 14.7078 | 22.048  | 20.885  | 0.57521 | 9.36E-18  | 2.39E-16  | Up-regulated |
| NR_040724    | RBM39          | 9584   | 7.1983  | 7.10535 | 10.0751 | 11.4929 | 0.57419 | 5.48E-05  | 0.000373  | Up-regulated |
| NM_001284240 | CCSER2         | 54462  | 3.4437  | 2.52994 | 4.18547 | 4.94723 | 0.57391 | 0.002065  | 0.0095674 | Up-regulated |
| NM_003358    | UGCG           | 7357   | 19.3751 | 20.5403 | 29.3213 | 30.0565 | 0.57323 | 8.27E-17  | 1.97E-15  | Up-regulated |
| NM_206900    | RTN2           | 6253   | 10.9273 | 11.5674 | 17.5356 | 16.2496 | 0.57292 | 1.34E-05  | 0.0001029 | Up-regulated |
| NM_015266    | SLC9A8         | 23315  | 4.93292 | 7.04052 | 8.68624 | 9.52293 | 0.57263 | 0.0010303 | 0.0052385 | Up-regulated |
| NM_006989    | RASA4          | 10156  | 1.35855 | 1.67323 | 2.21669 | 2.48467 | 0.57237 | 0.0099971 | 0.0369897 | Up-regulated |
| NM_015036    | ENDOD1         | 23052  | 9.74372 | 9.87727 | 14.8885 | 14.3306 | 0.57188 | 1.56E-11  | 2.45E-10  | Up-regulated |
| NM_031904    | FRMD8          | 83786  | 17.5942 | 16.8486 | 25.1652 | 26.0234 | 0.57183 | 9.40E-15  | 1.95E-13  | Up-regulated |
| NM_018349    | MCTP2          | 55784  | 1.01781 | 1.14396 | 1.68702 | 1.64824 | 0.57179 | 0.0060566 | 0.0241452 | Up-regulated |

|              |               |        |         |         |         |         |         |           |           |              |
|--------------|---------------|--------|---------|---------|---------|---------|---------|-----------|-----------|--------------|
| NM_001330261 | NFE2L1        | 4779   | 13.0499 | 9.99224 | 18.4881 | 16.1981 | 0.57175 | 6.82E-05  | 0.0004551 | Up-regulated |
| NM_001127173 | CADM3         | 57863  | 3.65395 | 4.1005  | 5.81764 | 5.91311 | 0.57173 | 0.0003918 | 0.0022124 | Up-regulated |
| NM_001042576 | RRBP1         | 6238   | 22.3547 | 23.4306 | 33.2711 | 34.7416 | 0.5717  | 1.85E-17  | 4.59E-16  | Up-regulated |
| NM_001293215 | TUBB          | 203068 | 14.4232 | 12.2361 | 19.7609 | 20.1244 | 0.57092 | 2.20E-06  | 1.94E-05  | Up-regulated |
| NM_001010854 | TTC7B         | 145567 | 10.122  | 10.3598 | 15.5729 | 14.9624 | 0.57077 | 7.44E-09  | 8.97E-08  | Up-regulated |
| NM_006086    | TUBB3         | 10381  | 178.616 | 168.833 | 263.251 | 251.532 | 0.57054 | 1.71E-30  | 8.32E-29  | Up-regulated |
| NM_001040457 | RHBDD2        | 57414  | 5.88341 | 7.08228 | 9.27644 | 10.552  | 0.57004 | 0.0046432 | 0.0192236 | Up-regulated |
| NM_017707    | ASAP3         | 55616  | 20.176  | 20.1249 | 30.0307 | 29.7283 | 0.56998 | 2.59E-20  | 7.81E-19  | Up-regulated |
| NR_036750    | LOC440434     | 440434 | 4.70713 | 5.28244 | 7.63512 | 7.7956  | 0.56969 | 0.0106426 | 0.0390528 | Up-regulated |
| NM_001042728 | RARG          | 5916   | 11.3005 | 11.2113 | 16.7516 | 16.7958 | 0.56951 | 4.87E-08  | 5.34E-07  | Up-regulated |
| NM_001024649 | CANX          | 821    | 3.42287 | 4.26475 | 5.52825 | 6.12008 | 0.56934 | 0.000725  | 0.0038438 | Up-regulated |
| NM_021724    | NR1D1         | 9572   | 14.1907 | 12.6238 | 20.4961 | 19.4942 | 0.56894 | 2.14E-07  | 2.17E-06  | Up-regulated |
| NM_138783    | ZNF653        | 115950 | 6.30288 | 5.2939  | 8.48867 | 9.12744 | 0.56839 | 0.0022808 | 0.0104008 | Up-regulated |
| NM_002360    | MAFK          | 7975   | 13.2713 | 13.9512 | 22.1332 | 18.5235 | 0.56786 | 1.97E-06  | 1.75E-05  | Up-regulated |
| NM_005402    | RALA          | 5898   | 18.1349 | 17.0183 | 24.7284 | 27.5577 | 0.56786 | 1.25E-08  | 1.47E-07  | Up-regulated |
| NM_001278438 | FNDC3A        | 22862  | 1.54864 | 1.54349 | 2.05525 | 2.73081 | 0.56761 | 0.0107302 | 0.0393515 | Up-regulated |
| NM_012244    | SLC7A8        | 23428  | 73.7279 | 80.2258 | 116.073 | 111.707 | 0.56729 | 2.52E-24  | 9.36E-23  | Up-regulated |
| NR_030717    | SNAPC2        | 6618   | 15.5798 | 15.8286 | 23.1504 | 23.7859 | 0.56681 | 1.69E-05  | 0.0001271 | Up-regulated |
| NM_001113348 | ECE1          | 1889   | 26.1187 | 30.0464 | 41.7025 | 41.5359 | 0.56622 | 6.43E-13  | 1.15E-11  | Up-regulated |
| NM_016133    | INSIG2        | 51141  | 5.53077 | 5.34296 | 7.5653  | 8.87486 | 0.56605 | 0.001142  | 0.0057374 | Up-regulated |
| NM_199444    | COPE          | 11316  | 11.5277 | 13.2754 | 17.4718 | 20.6373 | 0.56602 | 0.0087035 | 0.0329042 | Up-regulated |
| NM_133373    | PLCD3         | 113026 | 8.72065 | 8.90351 | 14.2199 | 12.1164 | 0.56596 | 1.03E-05  | 8.10E-05  | Up-regulated |
| NM_001278710 | NRN1          | 51299  | 18.1961 | 18.7314 | 27.2192 | 27.7536 | 0.56574 | 9.37E-07  | 8.73E-06  | Up-regulated |
| NM_033240    | PML           | 5371   | 2.95427 | 3.6304  | 5.60857 | 4.51898 | 0.56544 | 0.0072689 | 0.0282807 | Up-regulated |
| NM_014045    | LRP10         | 26020  | 16.3892 | 16.3346 | 25.0446 | 23.3428 | 0.56528 | 2.55E-19  | 7.26E-18  | Up-regulated |
| NM_001130066 | SYNGAP1       | 8831   | 4.15305 | 4.55821 | 6.36929 | 6.60778 | 0.56507 | 2.22E-06  | 1.95E-05  | Up-regulated |
| NM_001166110 | PALLD         | 23022  | 7.97676 | 7.34413 | 11.2862 | 11.4753 | 0.56507 | 4.71E-08  | 5.18E-07  | Up-regulated |
| NM_00101074  | UGT2B7        | 7364   | 10.8509 | 8.98716 | 14.2853 | 15.629  | 0.56475 | 0.0007121 | 0.0037817 | Up-regulated |
| NM_033550    | TP53RK        | 112858 | 12.1411 | 11.1583 | 17.2873 | 17.281  | 0.56428 | 7.78E-09  | 9.35E-08  | Up-regulated |
| NM_032310    | CARD19        | 84270  | 71.7941 | 71.9367 | 111.253 | 101.561 | 0.56393 | 1.91E-10  | 2.76E-09  | Up-regulated |
| NM_003805    | CRADD         | 8738   | 19.4323 | 18.6821 | 27.1731 | 29.8254 | 0.563   | 8.14E-05  | 0.0005338 | Up-regulated |
| NM_016479    | SHISA5        | 51246  | 26.6452 | 27.2079 | 41.3856 | 38.2245 | 0.56262 | 3.98E-11  | 6.06E-10  | Up-regulated |
| NM_007034    | member B4(T   | 11080  | 4.0918  | 3.96692 | 5.38915 | 6.871   | 0.56246 | 0.0054706 | 0.0221736 | Up-regulated |
| NM_005566    | LDHA          | 3939   | 1306.23 | 1249.42 | 1835.4  | 1927.77 | 0.56226 | 3.28E-40  | 2.19E-38  | Up-regulated |
| NM_002518    | NPAS2         | 4862   | 14.8938 | 15.4384 | 22.1235 | 22.6579 | 0.56178 | 5.46E-14  | 1.08E-12  | Up-regulated |
| NM_002305    | LGALS1        | 3956   | 4991.13 | 4690.98 | 7182.92 | 7020.61 | 0.56068 | 7.12E-40  | 4.69E-38  | Up-regulated |
| NM_014272    | ADAMT57       | 11173  | 1.3534  | 1.37594 | 2.04441 | 2.12381 | 0.56037 | 0.0089972 | 0.0338406 | Up-regulated |
| NM_138423    | CASC4         | 113201 | 4.1496  | 5.11389 | 6.16207 | 7.89972 | 0.56001 | 0.0037952 | 0.0161827 | Up-regulated |
| NM_201384    | PLEC          | 5339   | 31.9042 | 37.5396 | 58.8703 | 46.3425 | 0.55888 | 0.0038205 | 0.0162763 | Up-regulated |
| NM_203388    | RNH1          | 6050   | 15.8029 | 17.9401 | 23.576  | 26.5988 | 0.55743 | 4.29E-05  | 0.0002973 | Up-regulated |
| NM_022873    | IFI6          | 2537   | 13.0641 | 11.5098 | 18.7603 | 18.7703 | 0.55687 | 0.0116922 | 0.0421991 | Up-regulated |
| NM_001318827 | TSC2          | 7249   | 2.03414 | 1.73641 | 2.95039 | 2.77811 | 0.5567  | 0.0044943 | 0.018684  | Up-regulated |
| NM_001171166 | CAMTA2        | 23125  | 21.2123 | 22.637  | 33.598  | 30.9052 | 0.55623 | 2.55E-13  | 4.71E-12  | Up-regulated |
| NM_001164579 | C16orf52      | 730094 | 5.52022 | 6.01431 | 8.14338 | 8.94855 | 0.55609 | 1.23E-05  | 9.50E-05  | Up-regulated |
| NM_017877    | SLC35F6       | 54978  | 16.7625 | 16.9406 | 26.3523 | 23.3196 | 0.55597 | 7.96E-10  | 1.07E-08  | Up-regulated |
| NM_001303007 | DDAH2         | 23564  | 7.6835  | 9.73453 | 13.71   | 12.4425 | 0.5558  | 0.0015944 | 0.0076505 | Up-regulated |
| NM_004977    | KCNC3         | 3748   | 4.74602 | 4.76441 | 7.5301  | 6.69754 | 0.55515 | 0.0006002 | 0.003243  | Up-regulated |
| NM_001077701 | MIER1         | 57708  | 1.90521 | 1.99855 | 2.69495 | 3.21768 | 0.55505 | 0.0050661 | 0.0207365 | Up-regulated |
| NM_207380    | C15orf52      | 388115 | 12.354  | 12.7543 | 18.5865 | 18.2825 | 0.55466 | 2.41E-15  | 5.25E-14  | Up-regulated |
| NM_012401    | PLXNB2        | 23654  | 54.066  | 57.3859 | 82.9776 | 80.3242 | 0.55428 | 5.01E-32  | 2.60E-30  | Up-regulated |
| NM_006534    | NCOA3         | 8202   | 2.10492 | 2.70392 | 3.92039 | 3.30936 | 0.55417 | 0.0025122 | 0.0113395 | Up-regulated |
| NM_198793    | CD47          | 961    | 16.3701 | 16.7474 | 24.8555 | 23.6919 | 0.5532  | 1.97E-17  | 4.86E-16  | Up-regulated |
| NM_001122659 | EDNRR         | 1910   | 5.04862 | 4.78168 | 7.40793 | 7.13298 | 0.55302 | 1.81E-05  | 0.0001351 | Up-regulated |
| NM_138457    | FOXP4         | 116113 | 4.78189 | 4.17832 | 7.20717 | 6.10071 | 0.55255 | 0.0001583 | 0.0009767 | Up-regulated |
| NM_001040458 | ERAP1         | 51752  | 4.27461 | 4.45022 | 6.37002 | 6.5316  | 0.55243 | 7.87E-06  | 6.33E-05  | Up-regulated |
| NM_001165415 | LDHA          | 3939   | 14.1957 | 10.1611 | 17.0048 | 19.6763 | 0.55225 | 0.0043015 | 0.0179845 | Up-regulated |
| NM_002818    | PSME2         | 5721   | 113.142 | 107.576 | 161.707 | 161.544 | 0.55215 | 5.86E-14  | 1.15E-12  | Up-regulated |
| NM_004933    | CDH15         | 1013   | 4.62243 | 5.13952 | 6.86985 | 7.76737 | 0.55187 | 0.0016493 | 0.0078765 | Up-regulated |
| NM_000169    | GLA           | 2717   | 63.077  | 62.9365 | 93.4388 | 91.0136 | 0.55179 | 3.24E-17  | 7.91E-16  | Up-regulated |
| NM_001261403 | NFKB2         | 4791   | 5.12562 | 4.80406 | 7.96732 | 6.84951 | 0.55119 | 0.0008951 | 0.0046449 | Up-regulated |
| NM_033513    | TPGS1         | 91978  | 48.6534 | 46.4029 | 72.1055 | 67.4754 | 0.55117 | 5.54E-09  | 6.78E-08  | Up-regulated |
| NM_033445    | HIST3H2A      | 92815  | 47.4197 | 45.5379 | 70.3056 | 68.9371 | 0.55096 | 0.0028562 | 0.01263   | Up-regulated |
| NM_001201483 | ENO1          | 2023   | 6.36482 | 7.15564 | 11.268  | 9.02262 | 0.5508  | 0.0025168 | 0.0113519 | Up-regulated |
| NM_015213    | DENND5A       | 23258  | 31.0928 | 31.4053 | 45.9495 | 45.3809 | 0.55044 | 7.59E-32  | 3.91E-30  | Up-regulated |
| NM_002718    | PPP2R3A       | 5523   | 2.65625 | 2.88295 | 3.99798 | 4.19923 | 0.55043 | 7.06E-05  | 0.000469  | Up-regulated |
| NM_000919    | PAM           | 5066   | 6.11265 | 6.04612 | 10.3728 | 7.73607 | 0.55029 | 0.0006838 | 0.0036435 | Up-regulated |
| NM_001080477 | TENM3         | 55714  | 7.25684 | 7.54813 | 11.1465 | 10.4927 | 0.54792 | 7.06E-15  | 1.48E-13  | Up-regulated |
| NM_001006613 | TCEAL9        | 51186  | 18.4426 | 17.5735 | 26.8636 | 26.6328 | 0.54738 | 0.0005597 | 0.0030441 | Up-regulated |
| NM_153373    | PHYKPL        | 85007  | 9.15083 | 9.49026 | 13.7652 | 13.7302 | 0.54635 | 7.37E-05  | 0.0004879 | Up-regulated |
| NM_006395    | ATG7          | 10533  | 18.6026 | 16.6369 | 28.47   | 23.2998 | 0.54617 | 2.22E-06  | 1.95E-05  | Up-regulated |
| NM_006939    | SOS2          | 6655   | 4.6394  | 5.1488  | 6.99736 | 7.38831 | 0.54492 | 6.03E-06  | 4.97E-05  | Up-regulated |
| NM_005347    | ) member 5(F  | 3309   | 184.044 | 184.044 | 268.887 | 266.288 | 0.54477 | 2.37E-87  | 4.36E-85  | Up-regulated |
| NM_005581    | blood group   | 4059   | 6.3518  | 5.97357 | 9.27683 | 8.97873 | 0.54329 | 0.0005791 | 0.0031392 | Up-regulated |
| NM_001281777 | ZMYND8        | 23613  | 8.24523 | 6.77091 | 10.3794 | 11.709  | 0.54285 | 5.11E-05  | 0.0003497 | Up-regulated |
| NM_022495    | osiphila)(PCN | 64430  | 4.81115 | 5.03578 | 6.5844  | 7.98623 | 0.54172 | 0.0007514 | 0.0039746 | Up-regulated |
| NM_152222    | RELT          | 84957  | 7.23382 | 5.84955 | 10.4499 | 8.93408 | 0.54169 | 0.0012345 | 0.0061456 | Up-regulated |
| NM_173475    | DCUN1D3       | 123879 | 2.20707 | 2.22511 | 3.25616 | 3.2907  | 0.54164 | 0.0006069 | 0.0032728 | Up-regulated |
| NM_001328682 | APLP2         | 334    | 4.9898  | 4.97342 | 6.93268 | 7.74037 | 0.54153 | 0.0002323 | 0.0013773 | Up-regulated |
| NM_006800    | osiphila)(MS  | 10943  | 4.65369 | 4.03379 | 6.11756 | 6.94057 | 0.54114 | 0.0096634 | 0.035929  | Up-regulated |
| NM_004269    | MED27         | 9442   | 15.8484 | 15.6408 | 23.4792 | 22.7837 | 0.54103 | 5.83E-05  | 0.0003935 | Up-regulated |
| NM_001042663 | PLEKHG5       | 57449  | 2.70607 | 2.45091 | 4.34794 | 3.39999 | 0.541   | 0.0080342 | 0.0308003 | Up-regulated |
| NM_174921    | SMIM14        | 201895 | 3.36621 | 3.48131 | 4.58127 | 5.54351 | 0.54071 | 0.0007571 | 0.0040007 | Up-regulated |
| NM_001193489 | SECISBP2L     | 9728   | 8.55283 | 9.15472 | 13.1427 | 12.6159 | 0.54011 | 5.59E-12  | 9.14E-11  | Up-regulated |
| NM_003632    | CNTNAP1       | 8506   | 4.4971  | 4.71094 | 6.63712 | 6.85111 | 0.53973 | 3.78E-06  | 3.21E-05  | Up-regulated |

|              |               |        |         |         |         |         |         |           |           |              |
|--------------|---------------|--------|---------|---------|---------|---------|---------|-----------|-----------|--------------|
| NM_006734    | HIVEP2        | 3097   | 3.29571 | 3.53155 | 4.98095 | 4.97415 | 0.53945 | 1.09E-07  | 1.15E-06  | Up-regulated |
| NM_003622    | PPFIBP1       | 8496   | 82.8216 | 85.8782 | 121.165 | 123.288 | 0.53924 | 1.50E-50  | 1.36E-48  | Up-regulated |
| NM_001077351 | RBM23         | 55147  | 6.67553 | 6.12296 | 9.14008 | 9.70035 | 0.53874 | 0.0004688 | 0.0026024 | Up-regulated |
| NM_032403    | PCDHGC3       | 5098   | 35.3693 | 35.9129 | 52.5831 | 50.8332 | 0.5386  | 3.98E-16  | 9.05E-15  | Up-regulated |
| NM_001199163 | PSMC5         | 5705   | 25.3781 | 23.4534 | 36.1073 | 35.1706 | 0.53858 | 5.65E-07  | 5.43E-06  | Up-regulated |
| NM_016270    | KLF2          | 10365  | 3.37305 | 3.88063 | 5.38864 | 5.43145 | 0.53844 | 0.0068064 | 0.0266933 | Up-regulated |
| NM_018293    | ZNF654        | 55279  | 8.12573 | 8.73359 | 12.0628 | 12.4875 | 0.53841 | 1.05E-08  | 1.24E-07  | Up-regulated |
| NM_020379    | MAN1C1        | 57134  | 3.41995 | 3.55997 | 5.29966 | 4.95034 | 0.53819 | 0.0003297 | 0.0018948 | Up-regulated |
| NM_014755    | SERTAD2       | 9792   | 10.9335 | 11.8218 | 16.4603 | 16.5875 | 0.53726 | 6.73E-12  | 1.09E-10  | Up-regulated |
| NM_032870    | PNISR         | 25957  | 2.88048 | 2.36765 | 4.23716 | 3.5871  | 0.53726 | 0.0053324 | 0.021701  | Up-regulated |
| NM_017514    | PLXNA3        | 55558  | 13.7545 | 13.9068 | 20.1047 | 19.9724 | 0.53664 | 2.79E-20  | 8.41E-19  | Up-regulated |
| NM_033394    | TANC1         | 85461  | 13.4232 | 12.6219 | 18.6462 | 19.0862 | 0.53623 | 1.91E-17  | 4.73E-16  | Up-regulated |
| NM_033215    | PPP1R3F       | 89801  | 4.47036 | 3.93648 | 6.37272 | 6.02557 | 0.53554 | 0.0013896 | 0.0068236 | Up-regulated |
| NM_017944    | USP47         | 55031  | 2.75433 | 2.49849 | 4.27746 | 3.46446 | 0.53528 | 0.001088  | 0.0054982 | Up-regulated |
| NM_001098537 | PNPLA7        | 375775 | 2.11235 | 2.40932 | 3.66155 | 3.08418 | 0.53493 | 0.0081441 | 0.031153  | Up-regulated |
| NM_024015    | HOXB4         | 3214   | 6.94702 | 7.43125 | 10.9795 | 10.209  | 0.53455 | 0.0013503 | 0.0066532 | Up-regulated |
| NM_201540    | NDRG2         | 57447  | 7.64222 | 6.29151 | 10.4991 | 10.1148 | 0.53433 | 0.0029773 | 0.0130804 | Up-regulated |
| NM_021137    | TNFAIP1       | 7126   | 16.0424 | 15.5601 | 22.875  | 22.8847 | 0.53376 | 4.98E-13  | 8.98E-12  | Up-regulated |
| NM_001317136 | PFKFB4        | 5210   | 31.6186 | 32.5595 | 49.6812 | 43.3429 | 0.53354 | 2.59E-10  | 3.69E-09  | Up-regulated |
| NM_001040439 | MAPK8IP3      | 23162  | 16.6001 | 16.7946 | 24.2172 | 24.0574 | 0.53351 | 6.31E-20  | 1.86E-18  | Up-regulated |
| NM_001002914 | KCTD11        | 147040 | 6.52942 | 6.39106 | 9.73071 | 9.13085 | 0.53344 | 9.61E-05  | 0.0006213 | Up-regulated |
| NM_001975    | ENO2          | 2026   | 31.0349 | 28.5976 | 44.8411 | 41.5325 | 0.53297 | 3.14E-10  | 4.42E-09  | Up-regulated |
| NM_133493    | CD109         | 135228 | 99.2752 | 103.978 | 145.43  | 147.767 | 0.5326  | 1.37E-47  | 1.17E-45  | Up-regulated |
| NM_001301365 | LYST          | 1130   | 4.33198 | 5.32746 | 6.81038 | 7.24552 | 0.53249 | 3.55E-06  | 3.03E-05  | Up-regulated |
| NM_198507    | FAM174A       | 345757 | 9.44625 | 10.0147 | 14.2369 | 14.5254 | 0.53166 | 0.0030821 | 0.0134664 | Up-regulated |
| NM_003179    | SYP           | 6855   | 5.14838 | 4.86369 | 7.34926 | 7.40291 | 0.53149 | 0.0025656 | 0.0115342 | Up-regulated |
| NR_045058    | UBTF          | 7343   | 2.39813 | 3.11684 | 3.95669 | 4.23531 | 0.53139 | 0.0063466 | 0.0251324 | Up-regulated |
| NM_003316    | TTC3          | 7267   | 1.2683  | 1.72928 | 2.44106 | 2.05053 | 0.53116 | 0.0131879 | 0.0467498 | Up-regulated |
| NM_031895    | CACNG8        | 59283  | 3.12127 | 3.98456 | 5.70318 | 4.74655 | 0.53035 | 0.0012723 | 0.0063144 | Up-regulated |
| NM_006460    | HEXIM1        | 10614  | 29.2606 | 30.3067 | 43.3039 | 42.5324 | 0.52996 | 1.09E-24  | 4.17E-23  | Up-regulated |
| NM_201414    | APP           | 351    | 7.10367 | 6.96728 | 10.0915 | 10.3506 | 0.52987 | 1.03E-05  | 8.09E-05  | Up-regulated |
| NR_027692    | PHF1          | 5252   | 10.8152 | 10.2186 | 16.0297 | 14.6455 | 0.52983 | 5.67E-05  | 0.000384  | Up-regulated |
| NM_022833    | FAM129B       | 64855  | 104.988 | 103.587 | 165.163 | 136.364 | 0.52961 | 1.21E-09  | 1.58E-08  | Up-regulated |
| NM_014734    | SUSD6         | 9766   | 4.40972 | 3.98891 | 5.79236 | 6.43993 | 0.52948 | 0.0001156 | 0.0007347 | Up-regulated |
| NM_003190    | TAPBP         | 6892   | 58.0256 | 58.4651 | 88.7371 | 79.2799 | 0.52934 | 2.13E-15  | 4.68E-14  | Up-regulated |
| NM_144653    | NACC2         | 138151 | 6.88324 | 6.80628 | 9.76357 | 10.0101 | 0.52932 | 1.12E-10  | 1.64E-09  | Up-regulated |
| NM_024310    | PLEKHF1       | 79156  | 20.347  | 19.6223 | 29.1848 | 28.7375 | 0.52909 | 3.71E-07  | 3.65E-06  | Up-regulated |
| NM_006887    | ZFP36L2       | 678    | 36.1215 | 36.1193 | 52.2254 | 51.7618 | 0.52881 | 5.95E-26  | 2.44E-24  | Up-regulated |
| NM_139156    | AMPD2         | 271    | 20.6874 | 20.9771 | 30.8126 | 29.2645 | 0.52881 | 1.95E-14  | 3.97E-13  | Up-regulated |
| NM_001466    | FZD2          | 2535   | 8.02397 | 7.87756 | 11.7798 | 11.2689 | 0.52872 | 7.57E-07  | 7.15E-06  | Up-regulated |
| NM_001166247 | GRIK2         | 2898   | 4.03031 | 3.87822 | 5.2595  | 6.33627 | 0.52847 | 0.0009791 | 0.0050167 | Up-regulated |
| NM_001199383 | RNF145        | 153830 | 59.1789 | 58.7691 | 85.6823 | 83.9725 | 0.52838 | 3.66E-36  | 2.14E-34  | Up-regulated |
| NM_006736    | member B2(I   | 3300   | 41.503  | 42.4005 | 60.1544 | 60.5823 | 0.52812 | 2.14E-24  | 8.03E-23  | Up-regulated |
| NM_002395    | ME1           | 4199   | 21.8426 | 22.3363 | 33.0861 | 30.6027 | 0.52793 | 2.16E-12  | 3.65E-11  | Up-regulated |
| NM_002484    | NUBP1         | 4682   | 28.4401 | 28.0582 | 38.3073 | 43.6913 | 0.52763 | 1.45E-05  | 0.0001106 | Up-regulated |
| NM_005851    | CDK2AP2       | 10263  | 16.7188 | 19.2185 | 28.8119 | 23.7646 | 0.52705 | 0.0010284 | 0.0052328 | Up-regulated |
| NM_003804    | RIPK1         | 8737   | 5.46996 | 5.37943 | 7.80587 | 7.93013 | 0.52678 | 2.07E-05  | 0.0001529 | Up-regulated |
| NM_020205    | OTUD7B        | 56957  | 8.68106 | 9.14354 | 13.286  | 12.4181 | 0.52668 | 3.29E-10  | 4.61E-09  | Up-regulated |
| NM_182924    | MICALL2       | 79778  | 14.9684 | 14.8793 | 22.0221 | 20.9969 | 0.5257  | 1.87E-09  | 2.39E-08  | Up-regulated |
| NM_001170718 | BCAR1         | 9564   | 38.5843 | 40.2439 | 57.6821 | 55.6046 | 0.52559 | 6.13E-20  | 1.81E-18  | Up-regulated |
| NM_145056    | DACT3         | 147906 | 9.23377 | 8.26041 | 13.1967 | 12.2118 | 0.52471 | 7.95E-05  | 0.0005223 | Up-regulated |
| NM_001018078 | FPGS          | 2356   | 5.77317 | 5.20202 | 8.02164 | 8.08375 | 0.52433 | 0.0030243 | 0.0132476 | Up-regulated |
| NM_001042486 | DLGAP4        | 22839  | 14.5339 | 14.9645 | 20.3216 | 22.2065 | 0.52322 | 6.16E-08  | 6.66E-07  | Up-regulated |
| NM_020133    | AGPAT4        | 56895  | 1.471   | 1.84498 | 2.36448 | 2.52148 | 0.52309 | 0.0055533 | 0.0224469 | Up-regulated |
| NM_001271629 | MEF2D         | 4209   | 6.09771 | 6.38895 | 8.9714  | 9.01952 | 0.52226 | 7.75E-08  | 8.27E-07  | Up-regulated |
| NM_012424    | RPS6KC1       | 26750  | 4.99199 | 4.93003 | 7.75775 | 6.64642 | 0.5218  | 0.0003745 | 0.0021235 | Up-regulated |
| NM_015898    | ZBTB7A        | 51341  | 9.35397 | 9.71004 | 14.0183 | 13.3507 | 0.52176 | 1.02E-11  | 1.62E-10  | Up-regulated |
| NM_003565    | ULK1          | 8408   | 10.2079 | 11.2239 | 15.5075 | 15.292  | 0.52174 | 1.54E-09  | 2.00E-08  | Up-regulated |
| NM_020453    | tative)(ATP1I | 57205  | 4.12234 | 3.95767 | 5.82452 | 5.84496 | 0.52161 | 3.16E-06  | 2.72E-05  | Up-regulated |
| NM_013437    | LRP12         | 29967  | 6.95107 | 7.83649 | 11.1461 | 10.2048 | 0.52062 | 2.55E-05  | 0.0001852 | Up-regulated |
| NM_001319303 | KAZALD1       | 81621  | 5.02995 | 5.16468 | 7.1743  | 7.7101  | 0.51987 | 0.0014089 | 0.0069042 | Up-regulated |
| NM_001081562 | DMPK          | 1760   | 4.29055 | 5.17318 | 7.86936 | 6.15198 | 0.51967 | 0.0132844 | 0.0470438 | Up-regulated |
| NM_001346445 | M_00134644    | NA     | 23.6344 | 30.0589 | 38.5847 | 39.7152 | 0.51964 | 0.0016783 | 0.0080009 | Up-regulated |
| NM_018413    | CHST11        | 50515  | 13.9791 | 12.1186 | 18.4235 | 19.0644 | 0.51962 | 1.07E-08  | 1.27E-07  | Up-regulated |
| NM_021982    | SEC24A        | 10802  | 7.54763 | 8.41465 | 11.3711 | 11.5616 | 0.51961 | 1.79E-08  | 2.06E-07  | Up-regulated |
| NM_001318100 | LZTS2         | 84445  | 26.6848 | 28.2045 | 41.1273 | 37.5684 | 0.51892 | 2.19E-10  | 3.14E-09  | Up-regulated |
| NM_001242854 | ARFIP2        | 23647  | 3.79887 | 3.5925  | 5.8235  | 4.96894 | 0.51877 | 0.0030738 | 0.0134394 | Up-regulated |
| NM_015691    | WWC3          | 55841  | 2.74557 | 3.35076 | 4.37576 | 4.49022 | 0.51826 | 0.0009197 | 0.0047522 | Up-regulated |
| NM_198219    | ING1          | 3621   | 10.9883 | 11.0069 | 16.3607 | 15.2741 | 0.51784 | 2.17E-06  | 1.92E-05  | Up-regulated |
| NM_018174    | MAP1S         | 55201  | 98.8221 | 100.432 | 143.756 | 140.444 | 0.51664 | 2.96E-43  | 2.20E-41  | Up-regulated |
| NM_001320153 | CCNL2         | 81669  | 29.5914 | 31.8271 | 43.1871 | 44.5607 | 0.51622 | 9.47E-16  | 2.12E-14  | Up-regulated |
| NM_153029    | N4BP1         | 9683   | 6.55102 | 6.25724 | 9.23088 | 9.10636 | 0.51564 | 1.41E-09  | 1.84E-08  | Up-regulated |
| NM_031361    | COL4A3BP      | 10087  | 8.46293 | 9.60797 | 13.2842 | 12.6397 | 0.51533 | 4.16E-07  | 4.07E-06  | Up-regulated |
| NM_001286585 | CDIPT         | 10423  | 20.845  | 17.8286 | 28.8714 | 26.8704 | 0.51531 | 5.66E-05  | 0.0003839 | Up-regulated |
| NM_206926    | SELENON       | 57190  | 58.1225 | 64.0517 | 90.8957 | 83.6376 | 0.51525 | 1.42E-13  | 2.69E-12  | Up-regulated |
| NM_001286561 | NUMA1         | 4926   | 6.00102 | 8.7118  | 11.7159 | 9.74655 | 0.51481 | 0.0039229 | 0.0166381 | Up-regulated |
| NM_182540    | INTS6L        | 203522 | 2.64725 | 3.11139 | 4.20167 | 4.24114 | 0.51477 | 0.0073037 | 0.028393  | Up-regulated |
| NM_079423    | MYL6          | 4637   | 301.721 | 283.395 | 439.576 | 394.955 | 0.51462 | 2.66E-12  | 4.47E-11  | Up-regulated |
| NM_002730    | PRKACA        | 5566   | 14.8167 | 22.3458 | 26.3495 | 27.82   | 0.51379 | 0.0047136 | 0.0194602 | Up-regulated |
| NM_138368    | AP5B1         | 91056  | 13.3829 | 13.2766 | 18.4435 | 19.5715 | 0.51339 | 6.88E-15  | 1.44E-13  | Up-regulated |
| NM_130445    | COL18A1       | 80781  | 2.60497 | 2.99605 | 3.83931 | 4.2955  | 0.51322 | 0.0025198 | 0.0113578 | Up-regulated |
| NM_021173    | POLD4         | 57804  | 19.0303 | 18.2947 | 26.3678 | 27.1388 | 0.51318 | 2.28E-06  | 2.01E-05  | Up-regulated |
| NM_024596    | MCPH1         | 79648  | 1.05246 | 1.16985 | 1.60066 | 1.66286 | 0.51259 | 0.0110829 | 0.04042   | Up-regulated |
| NM_198484    | ZNF621        | 285268 | 5.28621 | 7.14939 | 9.53775 | 8.44397 | 0.5122  | 0.0008916 | 0.0046304 | Up-regulated |

|              |               |        |         |         |         |         |         |           |           |              |
|--------------|---------------|--------|---------|---------|---------|---------|---------|-----------|-----------|--------------|
| NM_001145135 | CPT1B         | 1375   | 5.8847  | 7.26066 | 9.35242 | 9.71758 | 0.51214 | 0.0025055 | 0.0113149 | Up-regulated |
| NM_003598    | TEAD2         | 8463   | 15.5213 | 16.5361 | 24.899  | 21.1548 | 0.512   | 7.64E-05  | 0.0005035 | Up-regulated |
| NM_015448    | nouse)(DPCI   | 25911  | 27.6776 | 29.0319 | 39.7443 | 41.9548 | 0.51194 | 0.000429  | 0.002401  | Up-regulated |
| NM_001256277 | RAB34         | 83871  | 15.3243 | 19.6751 | 27.4627 | 23.4242 | 0.5119  | 0.0040245 | 0.0170276 | Up-regulated |
| NM_006263    | PSME1         | 5720   | 79.9658 | 82.0733 | 111.951 | 118.923 | 0.51187 | 6.08E-11  | 9.15E-10  | Up-regulated |
| NM_001105079 | FBR5          | 64319  | 38.1695 | 38.1365 | 56.6718 | 52.0016 | 0.51181 | 2.27E-16  | 5.26E-15  | Up-regulated |
| NR_037916    | XIAP          | 331    | 2.557   | 2.58082 | 3.99342 | 3.41602 | 0.51116 | 0.0006418 | 0.0034415 | Up-regulated |
| NM_001256455 | ZBTB7B        | 51043  | 7.47301 | 7.59863 | 9.29532 | 12.5698 | 0.51096 | 0.0026826 | 0.0119786 | Up-regulated |
| NM_001307936 | SLC38A2       | 54407  | 5.27296 | 4.19915 | 6.65065 | 7.04362 | 0.5108  | 0.0012138 | 0.006052  | Up-regulated |
| NM_001130965 | SUN1          | 23353  | 6.26169 | 5.57475 | 9.60555 | 7.56116 | 0.51076 | 0.0023714 | 0.0107626 | Up-regulated |
| NM_030647    | KDM7A         | 80853  | 2.51215 | 2.82671 | 3.74676 | 3.91692 | 0.51037 | 6.59E-05  | 0.00044   | Up-regulated |
| NM_001346768 | M_00134676    | NA     | 7.3021  | 8.19088 | 11.6349 | 10.5211 | 0.50998 | 1.24E-06  | 1.13E-05  | Up-regulated |
| NM_005721    | ACTR3         | 10096  | 40.2131 | 40.076  | 55.9657 | 58.0661 | 0.50988 | 2.84E-32  | 1.49E-30  | Up-regulated |
| NM_001001701 | C4orf3        | 401152 | 25.8109 | 25.9576 | 36.1747 | 37.4768 | 0.50926 | 1.97E-13  | 3.67E-12  | Up-regulated |
| NM_003214    | TEAD3         | 7005   | 7.79427 | 6.06462 | 10.4932 | 9.59899 | 0.50906 | 0.0031073 | 0.013559  | Up-regulated |
| NM_006423    | RABAC1        | 10567  | 401.032 | 381.768 | 553.937 | 555.652 | 0.50889 | 6.49E-28  | 2.91E-26  | Up-regulated |
| NM_173582    | PGM2L1        | 283209 | 3.62762 | 4.09988 | 5.25271 | 5.81473 | 0.50847 | 2.94E-05  | 0.0002108 | Up-regulated |
| NM_006084    | IRF9          | 10379  | 29.8733 | 29.2067 | 41.2696 | 42.8474 | 0.50847 | 7.49E-09  | 9.02E-08  | Up-regulated |
| NM_001142551 | WDR47         | 22911  | 4.08377 | 4.8781  | 6.71547 | 6.20586 | 0.50842 | 0.0012728 | 0.0063151 | Up-regulated |
| NM_201403    | MOB3C         | 148932 | 4.57147 | 4.50886 | 6.76528 | 6.39143 | 0.50841 | 0.0030234 | 0.0132467 | Up-regulated |
| NM_052951    | DNTT1P1       | 116092 | 45.8023 | 45.6359 | 66.6152 | 63.431  | 0.50824 | 1.55E-09  | 2.01E-08  | Up-regulated |
| NM_006341    | east)(MAD2L   | 10459  | 110.292 | 100.861 | 149.824 | 149.999 | 0.50823 | 5.87E-13  | 1.05E-11  | Up-regulated |
| NM_145271    | ZNF688        | 146542 | 8.24367 | 9.10125 | 12.4924 | 12.5139 | 0.50778 | 0.0017588 | 0.0083327 | Up-regulated |
| NM_001318852 | MAPK8IP3      | 23162  | 3.03986 | 4.43151 | 5.22598 | 5.69611 | 0.50715 | 0.0115015 | 0.0416843 | Up-regulated |
| NM_006053    | TCIRG1        | 10312  | 4.46154 | 4.66111 | 6.75753 | 6.51235 | 0.50689 | 0.0060826 | 0.0242328 | Up-regulated |
| NM_025268    | TMEM121       | 80757  | 9.13893 | 11.19   | 15.2635 | 14.2693 | 0.50679 | 0.0062884 | 0.0249327 | Up-regulated |
| NM_001102426 | TBC1D8        | 11138  | 5.49473 | 5.28318 | 7.77467 | 7.6459  | 0.50652 | 4.14E-05  | 0.0002876 | Up-regulated |
| NM_001166139 | LCORL         | 254251 | 1.74552 | 1.81143 | 2.46456 | 2.73043 | 0.50651 | 0.0131553 | 0.04666   | Up-regulated |
| NM_005157    | ABL1          | 25     | 7.86817 | 7.63339 | 11.6821 | 10.4099 | 0.50565 | 8.12E-07  | 7.65E-06  | Up-regulated |
| NM_015144    | ZCCHC14       | 23174  | 16.1345 | 17.7122 | 24.0086 | 24.0061 | 0.50565 | 7.41E-14  | 1.44E-12  | Up-regulated |
| NM_020239    | CDC42SE1      | 56882  | 41.5508 | 42.9411 | 61.3943 | 58.3797 | 0.50564 | 1.09E-17  | 2.75E-16  | Up-regulated |
| NM_001190991 | CNPY2         | 10330  | 15.9176 | 16.2557 | 22.2484 | 24.1214 | 0.5056  | 0.0015948 | 0.0076505 | Up-regulated |
| NM_015473    | HEATR5A       | 25938  | 6.27755 | 6.44218 | 8.871   | 9.19    | 0.50476 | 5.99E-10  | 8.12E-09  | Up-regulated |
| NM_025224    | ZBTB46        | 140685 | 3.47195 | 3.35466 | 4.80477 | 4.96231 | 0.50391 | 0.0003088 | 0.001785  | Up-regulated |
| NM_182838    | SLC35E2       | 9906   | 6.81804 | 6.67004 | 9.55501 | 9.59501 | 0.50358 | 6.85E-09  | 8.30E-08  | Up-regulated |
| NM_032892    | FRMD5         | 84978  | 4.20148 | 4.60335 | 6.84553 | 5.79892 | 0.50351 | 0.0008228 | 0.0043036 | Up-regulated |
| NM_007346    | OGFR          | 11054  | 94.4463 | 93.4865 | 135.063 | 130.574 | 0.50337 | 3.28E-30  | 1.58E-28  | Up-regulated |
| NM_001142395 | PRRG1         | 5638   | 3.67155 | 3.84708 | 5.01373 | 5.81154 | 0.50298 | 0.0016551 | 0.0078963 | Up-regulated |
| NM_032732    | IL17RC        | 84818  | 18.3121 | 17.0987 | 24.7867 | 25.4106 | 0.50143 | 1.62E-07  | 1.67E-06  | Up-regulated |
| NM_005245    | FAT1          | 2195   | 8.52282 | 9.66394 | 12.677  | 13.0644 | 0.50088 | 5.08E-11  | 7.68E-10  | Up-regulated |
| NM_001002857 | ANXA2         | 302    | 112.667 | 116.666 | 164.806 | 158.897 | 0.50085 | 1.79E-22  | 5.96E-21  | Up-regulated |
| NM_001007228 | SPOP          | 8405   | 14.5647 | 13.9818 | 20.7217 | 19.7559 | 0.50062 | 1.15E-07  | 1.21E-06  | Up-regulated |
| NM_024298    | MBOAT7        | 79143  | 48.4497 | 49.594  | 70.7961 | 67.6945 | 0.5006  | 3.42E-18  | 8.96E-17  | Up-regulated |
| NM_020650    | RCN3          | 57333  | 279.891 | 277.879 | 405.361 | 381.414 | 0.50059 | 6.88E-31  | 3.41E-29  | Up-regulated |
| NM_017432    | PTOV1         | 53635  | 15.263  | 13.1624 | 21.9293 | 18.8149 | 0.50012 | 0.0014596 | 0.0071003 | Up-regulated |
| NM_0033161   | SURF4         | 6836   | 86.7051 | 91.0973 | 127.132 | 123.488 | 0.49876 | 1.28E-26  | 5.49E-25  | Up-regulated |
| NM_001308051 | PRUNE2        | 158471 | 10.155  | 8.45789 | 13.0778 | 13.3687 | 0.49865 | 2.65E-05  | 0.0001918 | Up-regulated |
| NM_019895    | CLDND1        | 56650  | 16.0102 | 12.7332 | 22.3537 | 18.8913 | 0.49861 | 0.0019237 | 0.008991  | Up-regulated |
| NM_030913    | SEMA6C        | 10500  | 5.48555 | 6.70649 | 8.91896 | 8.5303  | 0.49845 | 0.0008592 | 0.0044795 | Up-regulated |
| NM_020451    | SELENON       | 57190  | 5.15293 | 3.91261 | 6.36995 | 6.66858 | 0.49836 | 0.0048444 | 0.019927  | Up-regulated |
| NM_001142602 | SPHK1         | 8877   | 10.4598 | 10.154  | 15.9964 | 13.5453 | 0.4979  | 0.0019786 | 0.0092094 | Up-regulated |
| NM_001322263 | OC10050750    | 1E+08  | 10.6806 | 11.3    | 16.3674 | 15.4154 | 0.4973  | 0.0081072 | 0.0310305 | Up-regulated |
| NM_020199    | C5orf15       | 56951  | 28.6078 | 27.6198 | 38.6254 | 40.7289 | 0.49674 | 2.75E-10  | 3.90E-09  | Up-regulated |
| NM_005324    | H3F3B         | 3021   | 309.859 | 300.081 | 428.909 | 428.808 | 0.49672 | 8.24E-59  | 8.84E-57  | Up-regulated |
| NM_024663    | NPEPL1        | 79716  | 7.45184 | 8.34845 | 11.2713 | 11.3205 | 0.49605 | 0.0014121 | 0.0069165 | Up-regulated |
| NM_003943    | STBD1         | 8987   | 9.24111 | 8.54346 | 12.5736 | 12.6732 | 0.496   | 3.55E-05  | 0.0002503 | Up-regulated |
| NM_012336    | NARF          | 26502  | 41.7151 | 40.1077 | 59.8024 | 55.58   | 0.49586 | 2.76E-09  | 3.48E-08  | Up-regulated |
| NM_170692    | RASAL2        | 9462   | 2.36406 | 2.36351 | 3.09374 | 3.63442 | 0.4958  | 0.0002323 | 0.0013773 | Up-regulated |
| NM_203341    | SELENOF       | 9403   | 8.73765 | 11.8676 | 15.2752 | 14.4954 | 0.49542 | 0.0116546 | 0.0421169 | Up-regulated |
| NM_015075    | IQSEC2        | 23096  | 3.25269 | 3.4583  | 4.76242 | 4.79166 | 0.495   | 0.0004881 | 0.0026948 | Up-regulated |
| NM_024876    | COQ8B         | 79934  | 20.2171 | 20.7648 | 30.528  | 27.3649 | 0.49479 | 4.78E-07  | 4.64E-06  | Up-regulated |
| NM_004230    | S1PR2         | 9294   | 6.50158 | 6.43502 | 9.46048 | 8.92271 | 0.49472 | 7.77E-05  | 0.0005115 | Up-regulated |
| NM_005740    | DNAL4         | 10126  | 16.5638 | 15.5429 | 24.1386 | 21.4461 | 0.49444 | 0.0005383 | 0.0029363 | Up-regulated |
| NM_006482    | DYRK2         | 8445   | 13.3691 | 13.8312 | 19.1439 | 19.0993 | 0.49346 | 6.74E-15  | 1.42E-13  | Up-regulated |
| NM_001137601 | ZBTB42        | 1E+08  | 3.42421 | 3.1246  | 4.59467 | 4.80094 | 0.49302 | 0.0066699 | 0.0262308 | Up-regulated |
| NM_006155    | 2-Sep         | 4735   | 3.19007 | 3.86858 | 5.33665 | 4.83675 | 0.49226 | 0.0101787 | 0.0376108 | Up-regulated |
| NM_007368    | RASA3         | 22821  | 50.1234 | 51.2617 | 72.3127 | 69.875  | 0.49167 | 5.33E-27  | 2.31E-25  | Up-regulated |
| NM_006777    | ZBTB33        | 10009  | 10.8966 | 10.759  | 14.7857 | 15.6802 | 0.49138 | 8.73E-10  | 1.17E-08  | Up-regulated |
| NM_000543    | SMPD1         | 6609   | 73.0657 | 75.1757 | 107.428 | 100.527 | 0.49121 | 4.71E-18  | 1.22E-16  | Up-regulated |
| NM_003612    | agen blood gr | 8482   | 9.06592 | 10.4748 | 12.775  | 14.9446 | 0.49097 | 0.0004164 | 0.0023396 | Up-regulated |
| NM_014504    | RABGEF1       | 27342  | 3.68328 | 3.47202 | 5.34014 | 4.8777  | 0.49095 | 0.0036838 | 0.0157747 | Up-regulated |
| NM_003222    | TFAP2C        | 7022   | 18.4001 | 18.0235 | 25.7634 | 25.4242 | 0.49029 | 1.38E-09  | 1.80E-08  | Up-regulated |
| NM_207352    | CYP4V2        | 285440 | 3.52075 | 3.91407 | 5.36735 | 5.18844 | 0.49018 | 0.00101   | 0.0051542 | Up-regulated |
| NM_054027    | ANKH          | 56172  | 12.3192 | 13.2767 | 17.9943 | 17.9128 | 0.49007 | 3.58E-14  | 7.17E-13  | Up-regulated |
| NM_001112732 | MCF2L         | 23263  | 12.2882 | 13.0087 | 17.022  | 18.4831 | 0.48915 | 3.28E-10  | 4.61E-09  | Up-regulated |
| NM_001018070 | CORO1B        | 57175  | 22.6491 | 35.743  | 42.0163 | 41.861  | 0.48914 | 0.0103918 | 0.0382468 | Up-regulated |
| NM_001320596 | DDX5          | 1655   | 89.0012 | 82.0949 | 115.387 | 124.382 | 0.48902 | 9.38E-16  | 2.10E-14  | Up-regulated |
| NM_002958    | RYK           | 6259   | 9.12951 | 8.51804 | 12.372  | 12.5189 | 0.48877 | 4.82E-05  | 0.0003306 | Up-regulated |
| NM_014822    | SEC24D        | 9871   | 14.3763 | 14.3445 | 20.6137 | 19.6654 | 0.48836 | 3.18E-10  | 4.47E-09  | Up-regulated |
| NM_001304762 | EVA1B         | 55194  | 24.7479 | 25.6557 | 34.578  | 36.7353 | 0.48799 | 0.0004818 | 0.0026662 | Up-regulated |
| NM_001530    | HIF1A         | 3091   | 32.9737 | 30.645  | 43.7176 | 45.3781 | 0.48797 | 6.70E-15  | 1.41E-13  | Up-regulated |
| NM_013392    | NRBP1         | 29959  | 17.6915 | 21.1172 | 27.0681 | 27.6441 | 0.48793 | 4.14E-05  | 0.0002876 | Up-regulated |
| NR_120317    | LINC01314     | 1E+08  | 3.19335 | 2.806   | 4.00236 | 4.48344 | 0.48627 | 0.0009802 | 0.0050209 | Up-regulated |
| NM_006186    | NR4A2         | 4929   | 7.21861 | 6.12667 | 9.24256 | 9.63422 | 0.48579 | 0.0006062 | 0.0032713 | Up-regulated |

|              |                |        |         |         |         |         |         |           |           |              |
|--------------|----------------|--------|---------|---------|---------|---------|---------|-----------|-----------|--------------|
| NM_0033452   | TRIM47         | 91107  | 71.9887 | 73.9303 | 101.114 | 102.656 | 0.48538 | 4.67E-23  | 1.63E-21  | Up-regulated |
| NM_015117    | ZC3H3          | 23144  | 11.3863 | 11.9488 | 16.8995 | 15.854  | 0.4844  | 1.68E-06  | 1.50E-05  | Up-regulated |
| NM_016374    | ARID4B         | 51742  | 3.42356 | 4.2529  | 5.43682 | 5.43682 | 0.48438 | 0.0014687 | 0.0071336 | Up-regulated |
| NM_007122    | USF1           | 7391   | 9.56902 | 12.7109 | 17.3072 | 14.583  | 0.48435 | 0.0135769 | 0.0479244 | Up-regulated |
| NM_006888    | CALM1          | 801    | 106.214 | 104.696 | 145.159 | 148.907 | 0.48402 | 6.40E-46  | 5.09E-44  | Up-regulated |
| NM_001099409 | EHBPI1L1       | 254102 | 20.3088 | 20.1126 | 29.8819 | 26.6451 | 0.48368 | 5.10E-10  | 6.98E-09  | Up-regulated |
| NM_015254    | KIF13B         | 23303  | 8.34878 | 8.54082 | 12.0376 | 11.5547 | 0.48316 | 2.06E-12  | 3.49E-11  | Up-regulated |
| NM_002131    | HMGA1          | 3159   | 87.4379 | 91.0973 | 128.646 | 120.34  | 0.48254 | 5.04E-16  | 1.14E-14  | Up-regulated |
| NM_014844    | TECPR2         | 9895   | 2.33163 | 2.37256 | 3.46084 | 3.16298 | 0.48223 | 0.0003344 | 0.0019192 | Up-regulated |
| NM_153213    | ARHGEF19       | 128272 | 7.72672 | 7.9073  | 10.7412 | 11.1949 | 0.48112 | 4.07E-05  | 0.0002831 | Up-regulated |
| NM_001284215 | TRIP12         | 9320   | 8.74828 | 9.11249 | 11.485  | 13.4896 | 0.48057 | 5.26E-07  | 5.07E-06  | Up-regulated |
| NM_014840    | NUAK1          | 9891   | 1.62649 | 2.00697 | 2.64175 | 2.54444 | 0.48044 | 0.0115294 | 0.0417321 | Up-regulated |
| NM_001320845 | SAT2           | 112483 | 39.1329 | 40.1259 | 59.2948 | 51.7734 | 0.48009 | 0.0001091 | 0.0006966 | Up-regulated |
| NM_000484    | APP            | 351    | 159.459 | 162.891 | 219.798 | 228.457 | 0.48009 | 8.19E-39  | 5.20E-37  | Up-regulated |
| NM_181892    | UBE2D3         | 7323   | 10.1377 | 8.89827 | 13.3711 | 13.2678 | 0.47994 | 6.72E-06  | 5.47E-05  | Up-regulated |
| NM_024830    | LPCAT1         | 79888  | 31.254  | 30.5881 | 43.6092 | 42.434  | 0.47967 | 1.54E-18  | 4.09E-17  | Up-regulated |
| NM_006832    | FERMT2         | 10979  | 8.80703 | 8.34266 | 11.3552 | 12.6793 | 0.47959 | 0.0001024 | 0.0006583 | Up-regulated |
| NM_001684    | ATP2B4         | 493    | 12.8387 | 13.4299 | 18.1113 | 18.4625 | 0.47958 | 6.95E-17  | 1.67E-15  | Up-regulated |
| NM_003099    | SNX1           | 6642   | 22.4042 | 21.0801 | 29.3412 | 31.1561 | 0.47881 | 2.09E-16  | 4.86E-15  | Up-regulated |
| NM_024585    | ARMC7          | 79637  | 8.43717 | 8.84256 | 13.0012 | 11.3748 | 0.47867 | 0.0021993 | 0.0100845 | Up-regulated |
| NM_001079673 | FNDC3A         | 22862  | 4.97745 | 5.75095 | 7.31521 | 7.71508 | 0.47847 | 6.71E-05  | 0.0004477 | Up-regulated |
| NM_000308    | CTSA           | 5476   | 128.055 | 125.044 | 174.734 | 176.682 | 0.47806 | 8.52E-43  | 6.24E-41  | Up-regulated |
| NR_003659    | WASH3P         | 374666 | 5.4033  | 5.04234 | 7.69308 | 7.07733 | 0.47788 | 0.0061719 | 0.0245322 | Up-regulated |
| NM_002406    | 2-N-acetylgl   | 4245   | 18.7171 | 18.9443 | 28.0031 | 24.5503 | 0.47781 | 1.66E-06  | 1.49E-05  | Up-regulated |
| NM_030666    | SERPINB1       | 1992   | 11.2565 | 10.0192 | 14.012  | 15.842  | 0.47758 | 0.0004144 | 0.002329  | Up-regulated |
| NM_007066    | atalytic) inhi | 11142  | 16.7482 | 16.1204 | 22.5929 | 23.6814 | 0.4774  | 0.0015727 | 0.0075678 | Up-regulated |
| NM_006509    | RELB           | 5971   | 10.5111 | 11.0013 | 15.4331 | 14.6897 | 0.47738 | 0.0001525 | 0.0009456 | Up-regulated |
| NM_003274    | ADAM19         | 8728   | 13.6399 | 14.2367 | 19.9843 | 18.7786 | 0.47659 | 6.30E-12  | 1.03E-10  | Up-regulated |
| NM_001257323 | APBB1          | 322    | 16.8275 | 13.9678 | 23.0643 | 20.2209 | 0.47642 | 0.0012601 | 0.0062604 | Up-regulated |
| NM_0030808   | NDEL1          | 81565  | 13.471  | 12.4062 | 17.1852 | 18.9525 | 0.47461 | 9.94E-05  | 0.0006404 | Up-regulated |
| NM_001035005 | C18orf32       | 497661 | 10.1833 | 8.99635 | 12.4323 | 14.8075 | 0.47436 | 0.0104163 | 0.0383107 | Up-regulated |
| NM_004491    | ARHGAP35       | 2909   | 11.3787 | 11.1165 | 15.9674 | 15.2324 | 0.47387 | 1.23E-14  | 2.53E-13  | Up-regulated |
| NM_138373    | MYADM          | 91663  | 13.4807 | 13.9529 | 21.7494 | 16.7267 | 0.47373 | 0.0012556 | 0.0062412 | Up-regulated |
| NM_015907    | LAP3           | 51056  | 119.961 | 116.284 | 161.269 | 165.841 | 0.4736  | 8.18E-27  | 3.51E-25  | Up-regulated |
| NM_133491    | SAT2           | 112483 | 34.7782 | 29.1738 | 42.3251 | 47.4387 | 0.47356 | 0.0018947 | 0.0088707 | Up-regulated |
| NM_198317    | KLHL17         | 339451 | 16.9035 | 18.531  | 24.3428 | 24.9613 | 0.47326 | 1.05E-06  | 9.71E-06  | Up-regulated |
| NM_001007561 | IRGQ           | 126298 | 7.51799 | 7.96274 | 11.3415 | 10.1548 | 0.47215 | 5.86E-08  | 6.37E-07  | Up-regulated |
| NM_006184    | NUCB1          | 4924   | 136.124 | 145.477 | 196.682 | 192.87  | 0.47191 | 5.60E-23  | 1.93E-21  | Up-regulated |
| NM_004368    | CNN2           | 1265   | 29.2575 | 27.6641 | 39.7438 | 39.1278 | 0.47174 | 1.51E-10  | 2.20E-09  | Up-regulated |
| NM_001136472 | LITAF          | 9516   | 95.5392 | 95.5118 | 135.102 | 129.109 | 0.47155 | 1.11E-24  | 4.24E-23  | Up-regulated |
| NM_001013703 | EIF2AK4        | 440275 | 13.709  | 12.7243 | 18.7523 | 17.8912 | 0.47144 | 7.52E-10  | 1.01E-08  | Up-regulated |
| NM_012416    | RANBP6         | 26953  | 4.5353  | 5.01947 | 6.84464 | 6.50636 | 0.47061 | 0.000491  | 0.0027073 | Up-regulated |
| NM_013306    | SNX15          | 29907  | 13.618  | 13.5121 | 18.8697 | 18.8953 | 0.47052 | 8.28E-05  | 0.0005414 | Up-regulated |
| NM_018370    | DRAM1          | 55332  | 4.77623 | 5.03586 | 6.52194 | 7.23125 | 0.4701  | 0.0021053 | 0.0097257 | Up-regulated |
| NM_001204302 | APP            | 351    | 8.65664 | 8.00751 | 12.8726 | 10.4414 | 0.47004 | 0.0014643 | 0.0071191 | Up-regulated |
| NM_002446    | MAP3K10        | 4294   | 22.4045 | 23.9683 | 33.6634 | 30.5737 | 0.46964 | 2.82E-08  | 3.17E-07  | Up-regulated |
| NM_004883    | NRG2           | 9542   | 3.0246  | 3.1122  | 4.39238 | 4.23884 | 0.46925 | 0.0072989 | 0.02838   | Up-regulated |
| NM_000930    | PLAT           | 5327   | 21.2979 | 22.5794 | 30.691  | 29.9576 | 0.46785 | 3.13E-10  | 4.41E-09  | Up-regulated |
| NM_052937    | isferase doma  | 115294 | 3.43157 | 4.08769 | 5.18164 | 5.38376 | 0.46678 | 0.0056619 | 0.0228104 | Up-regulated |
| NM_006355    | TRIM38         | 10475  | 5.87838 | 6.17459 | 8.52003 | 8.16803 | 0.4667  | 5.84E-06  | 4.82E-05  | Up-regulated |
| NM_004414    | RCAN1          | 1827   | 15.8978 | 16.0907 | 21.9345 | 22.3425 | 0.46647 | 5.93E-07  | 5.67E-06  | Up-regulated |
| NR_040722    | RBM39          | 9584   | 4.44501 | 5.19426 | 7.13477 | 6.44748 | 0.46645 | 0.0096489 | 0.0358845 | Up-regulated |
| NM_0021237   | SELENOK        | 58515  | 162.767 | 161.34  | 226.422 | 220.011 | 0.46638 | 2.10E-14  | 4.25E-13  | Up-regulated |
| NM_133171    | ELMO2          | 63916  | 10.7137 | 9.58478 | 13.4176 | 14.7242 | 0.46627 | 2.31E-05  | 0.0001697 | Up-regulated |
| NM_020717    | SHROOM4        | 57477  | 1.67431 | 1.97103 | 2.43942 | 2.66963 | 0.46622 | 0.0038788 | 0.0164912 | Up-regulated |
| NR_136715    | PANK2          | 80025  | 2.1948  | 1.98292 | 2.68144 | 3.16953 | 0.46612 | 0.0047386 | 0.0195497 | Up-regulated |
| NM_001305066 | TMEM59         | 9528   | 107.642 | 90.4377 | 137.212 | 136.924 | 0.46602 | 1.27E-05  | 9.76E-05  | Up-regulated |
| NM_001185080 | CLDN15         | 24146  | 12.9257 | 14.2357 | 20.3547 | 17.4478 | 0.46558 | 0.0008912 | 0.0046297 | Up-regulated |
| NM_175061    | JAZF1          | 221895 | 8.06228 | 7.71297 | 10.9885 | 10.8944 | 0.46542 | 9.83E-05  | 0.0006348 | Up-regulated |
| NM_0048368   | CTDP1          | 9150   | 9.61217 | 7.94104 | 13.5633 | 11.0038 | 0.46528 | 0.003688  | 0.0157857 | Up-regulated |
| NM_001099856 | IKBKG          | 8517   | 9.50393 | 11.5617 | 13.2557 | 16.3516 | 0.46508 | 0.0103307 | 0.0380764 | Up-regulated |
| NM_139245    | PPM1L          | 151742 | 1.8319  | 1.66204 | 2.51435 | 2.35859 | 0.46487 | 0.0010194 | 0.005194  | Up-regulated |
| NM_005572    | LMNA           | 4000   | 322.938 | 325.325 | 449.73  | 441.612 | 0.46458 | 1.75E-53  | 1.72E-51  | Up-regulated |
| NM_015894    | STMN3          | 50861  | 11.0933 | 10.4578 | 15.1592 | 14.7478 | 0.46454 | 0.0001208 | 0.0007652 | Up-regulated |
| NM_001164748 | RASSF8         | 11228  | 33.1232 | 34.1412 | 43.9932 | 48.6593 | 0.46358 | 1.51E-12  | 2.59E-11  | Up-regulated |
| NR_024368    | LINC01000      | 402483 | 6.3075  | 8.19991 | 10.9173 | 9.27415 | 0.4631  | 0.0011585 | 0.0058098 | Up-regulated |
| NM_020840    | FNIP2          | 57600  | 7.55771 | 7.41446 | 10.351  | 10.2533 | 0.46172 | 3.20E-09  | 4.01E-08  | Up-regulated |
| NM_032802    | SPPL2A         | 84888  | 28.099  | 28.5939 | 38.614  | 39.472  | 0.46139 | 9.13E-09  | 1.09E-07  | Up-regulated |
| NM_001276294 | NISCH          | 11188  | 4.3466  | 4.62854 | 6.6137  | 5.98583 | 0.46056 | 0.0124247 | 0.0445014 | Up-regulated |
| NM_213589    | ckstrin homol  | 65059  | 3.04897 | 2.85362 | 3.97881 | 4.17746 | 0.46049 | 4.12E-05  | 0.0002863 | Up-regulated |
| NM_181443    | BTBD3          | 22903  | 17.8655 | 17.7034 | 24.3362 | 24.5305 | 0.4601  | 2.02E-13  | 3.77E-12  | Up-regulated |
| NM_001039671 | YIF1B          | 90522  | 5.29332 | 5.38182 | 7.87519 | 7.01479 | 0.45959 | 0.0062071 | 0.0246566 | Up-regulated |
| NM_001330731 | SLC44A1        | 23446  | 11.6138 | 10.947  | 15.2832 | 15.8697 | 0.45858 | 0.000109  | 0.0006963 | Up-regulated |
| NM_024536    | CHPF           | 79586  | 148.557 | 150.966 | 211.33  | 199.12  | 0.45851 | 3.89E-25  | 1.52E-23  | Up-regulated |
| NM_007223    | GPR176         | 11245  | 5.05899 | 5.24109 | 7.18444 | 7.05497 | 0.45816 | 0.0001912 | 0.001156  | Up-regulated |
| NM_000966    | RARG           | 5916   | 9.76393 | 10.8298 | 14.0183 | 14.4111 | 0.45814 | 9.30E-05  | 0.0006021 | Up-regulated |
| NM_015917    | GSTK1          | 373156 | 109.577 | 110.09  | 149.123 | 151.65  | 0.45687 | 5.50E-14  | 1.08E-12  | Up-regulated |
| NM_145754    | KIFC2          | 90990  | 32.5719 | 34.0106 | 46.056  | 45.1675 | 0.45671 | 2.57E-14  | 5.19E-13  | Up-regulated |
| NM_001271788 | DYNC1I2        | 1781   | 9.26541 | 8.42911 | 12.5917 | 11.7734 | 0.45644 | 1.82E-05  | 0.000136  | Up-regulated |
| NM_003038    | SLC1A4         | 6509   | 20.1224 | 21.1385 | 28.9754 | 27.5625 | 0.45623 | 1.28E-11  | 2.02E-10  | Up-regulated |
| NM_005116    | SLC23A2        | 9962   | 42.1824 | 40.8551 | 57.4745 | 56.1255 | 0.45616 | 1.81E-29  | 8.52E-28  | Up-regulated |
| NM_016291    | IP6K2          | 51447  | 18.2954 | 16.0623 | 23.2333 | 24.1564 | 0.45605 | 0.0002846 | 0.0016565 | Up-regulated |
| NR_046084    | SH3BP5-AS1     | 1E+08  | 34.3247 | 35.0493 | 46.8437 | 48.0705 | 0.45587 | 9.18E-24  | 3.30E-22  | Up-regulated |
| NM_152334    | TARSL2         | 123283 | 9.12546 | 8.31189 | 11.7895 | 12.2244 | 0.45526 | 0.0001198 | 0.0007591 | Up-regulated |

|              |          |        |         |         |         |         |         |           |           |              |
|--------------|----------|--------|---------|---------|---------|---------|---------|-----------|-----------|--------------|
| NM_203458    | NOTCH2NL | 388677 | 7.18461 | 7.53398 | 10.3278 | 9.8925  | 0.45472 | 2.37E-06  | 2.07E-05  | Up-regulated |
| NM_015206    | KIAA1024 | 23251  | 1.665   | 1.83916 | 2.36211 | 2.52682 | 0.4544  | 0.0117194 | 0.0422754 | Up-regulated |
| NM_004055    | CAPN5    | 726    | 7.75602 | 7.80997 | 11.0376 | 10.3401 | 0.45379 | 1.24E-05  | 9.53E-05  | Up-regulated |
| NR_024389    | FLJ16779 | 1E+08  | 12.1538 | 15.0952 | 19.3639 | 18.0863 | 0.45307 | 5.08E-05  | 0.0003482 | Up-regulated |
| NM_032048    | EMILIN2  | 84034  | 9.45339 | 9.33067 | 13.9458 | 11.8914 | 0.45279 | 0.000167  | 0.0010243 | Up-regulated |
| NM_052925    | LENG8    | 114823 | 60.5678 | 63.4872 | 89.0328 | 80.4589 | 0.45200 | 7.21E-12  | 1.17E-10  | Up-regulated |
| NM_001161576 | SAMD4A   | 23034  | 13.7591 | 12.0367 | 16.2921 | 19.1187 | 0.45172 | 3.62E-05  | 0.0002545 | Up-regulated |
| NM_015125    | CIC      | 23152  | 23.8886 | 23.8244 | 33.1802 | 31.906  | 0.45102 | 7.47E-17  | 1.79E-15  | Up-regulated |
| NM_152649    | MLKL     | 197259 | 4.3894  | 4.47589 | 6.1506  | 6.18658 | 0.45062 | 0.0104204 | 0.0383185 | Up-regulated |
| NM_198562    | C3orf62  | 375341 | 3.89022 | 4.18193 | 5.62764 | 5.54077 | 0.45024 | 0.0054241 | 0.0220086 | Up-regulated |
| NM_001040454 | SLC26A6  | 65010  | 11.1059 | 12.8327 | 18.4022 | 14.6912 | 0.44993 | 0.0040603 | 0.0171257 | Up-regulated |
| NM_001300952 | SRGAP2   | 23380  | 6.86067 | 8.72509 | 11.0995 | 10.4272 | 0.44986 | 0.0025265 | 0.0113797 | Up-regulated |
| NM_002901    | RCN1     | 5954   | 207.56  | 209.862 | 280.874 | 287.329 | 0.4497  | 1.12E-42  | 8.17E-41  | Up-regulated |
| NM_005831    | CALCOCO2 | 10241  | 16.0942 | 15.9099 | 22.3919 | 21.3001 | 0.44952 | 1.13E-08  | 1.33E-07  | Up-regulated |
| NM_001520    | GTF3C1   | 2975   | 11.6902 | 9.18586 | 13.8396 | 14.8188 | 0.44914 | 0.0002763 | 0.0016153 | Up-regulated |
| NR_134455    | FAM214B  | 80256  | 6.65356 | 5.91989 | 8.28707 | 9.10217 | 0.44863 | 0.0057392 | 0.023062  | Up-regulated |
| NM_001947    | DUSP7    | 1849   | 19.4645 | 19.6332 | 28.0918 | 25.293  | 0.44839 | 3.71E-07  | 3.65E-06  | Up-regulated |
| NM_001946    | DUSP6    | 1848   | 24.578  | 23.3926 | 32.6345 | 32.7695 | 0.44835 | 2.61E-11  | 4.03E-10  | Up-regulated |
| NM_001012761 | RGMB     | 285704 | 5.62249 | 5.83246 | 7.84132 | 7.8425  | 0.4482  | 0.0001019 | 0.0006556 | Up-regulated |
| NM_194318    | B3GLCT   | 145173 | 4.54226 | 4.15073 | 5.81897 | 6.15775 | 0.44807 | 0.0022019 | 0.010094  | Up-regulated |
| NM_005876    | SPEG     | 10290  | 1.20885 | 1.43767 | 1.91257 | 1.76315 | 0.44797 | 0.0116751 | 0.0421534 | Up-regulated |
| NM_033046    | RTKN     | 6242   | 7.52503 | 6.77861 | 10.1693 | 9.53833 | 0.44746 | 0.0029176 | 0.0128628 | Up-regulated |
| NM_0022450   | RHBDP1   | 64285  | 39.5563 | 40.177  | 55.766  | 52.7652 | 0.44733 | 1.49E-13  | 2.82E-12  | Up-regulated |
| NM_001110781 | SLC35E2B | 728661 | 6.39981 | 5.74569 | 8.08585 | 8.53688 | 0.44714 | 3.77E-05  | 0.0002638 | Up-regulated |
| NM_001779    | CD58     | 965    | 25.3744 | 28.3215 | 36.9287 | 36.687  | 0.44699 | 0.0004265 | 0.0023904 | Up-regulated |
| NM_003498    | SNN      | 8303   | 10.4269 | 9.78586 | 13.5165 | 14.1124 | 0.44691 | 3.11E-05  | 0.0002216 | Up-regulated |
| NM_001128164 | ATXN1    | 6310   | 3.7833  | 3.8267  | 5.18915 | 5.18876 | 0.44638 | 5.58E-07  | 5.36E-06  | Up-regulated |
| NM_0022737   | PLPPR2   | 64748  | 15.0155 | 17.4863 | 21.8271 | 22.6211 | 0.44626 | 7.29E-05  | 0.0004829 | Up-regulated |
| NM_020119    | ZC3HAV1  | 56829  | 9.69876 | 9.44366 | 12.4964 | 13.5822 | 0.44625 | 1.74E-08  | 2.00E-07  | Up-regulated |
| NM_016217    | HECA     | 51696  | 3.25315 | 3.41789 | 4.54149 | 4.61124 | 0.44591 | 0.0012141 | 0.006052  | Up-regulated |
| NM_014423    | AFF4     | 27125  | 17.4252 | 17.0709 | 22.7895 | 24.0991 | 0.44585 | 4.21E-17  | 1.02E-15  | Up-regulated |
| NM_021019    | MYL6     | 4637   | 521.909 | 515.952 | 695.844 | 711.179 | 0.44539 | 1.24E-30  | 6.06E-29  | Up-regulated |
| NM_145899    | HMGA1    | 3159   | 185.554 | 175.173 | 246.528 | 243.093 | 0.44515 | 7.33E-24  | 2.64E-22  | Up-regulated |
| NM_005627    | SGK1     | 6446   | 96.135  | 91.9409 | 126.093 | 129.219 | 0.44491 | 3.37E-21  | 1.06E-19  | Up-regulated |
| NM_006532    | ELL      | 8178   | 5.85987 | 6.89456 | 9.01652 | 8.48302 | 0.44444 | 0.0014131 | 0.0069191 | Up-regulated |
| NM_001199867 | MARK4    | 57787  | 11.4293 | 11.9813 | 16.386  | 15.4721 | 0.44418 | 4.23E-08  | 4.67E-07  | Up-regulated |
| NM_004187    | KDM5C    | 8242   | 18.727  | 18.7712 | 26.3698 | 24.5642 | 0.4441  | 4.20E-13  | 7.63E-12  | Up-regulated |
| NM_001102421 | ZFAND5   | 7763   | 18.9032 | 15.8248 | 24.4992 | 22.8424 | 0.44384 | 9.67E-06  | 7.64E-05  | Up-regulated |
| NM_003338    | UBE2D1   | 7321   | 5.64844 | 6.02943 | 7.67429 | 8.43458 | 0.44382 | 0.0067882 | 0.0266383 | Up-regulated |
| NM_178863    | KCTD13   | 253980 | 40.4703 | 40.867  | 54.9204 | 55.6223 | 0.44379 | 1.04E-09  | 1.38E-08  | Up-regulated |
| NM_018207    | TRIM62   | 55223  | 5.74419 | 5.56402 | 7.69125 | 7.77597 | 0.44368 | 0.0005338 | 0.0029141 | Up-regulated |
| NM_001682    | ATP2B1   | 490    | 14.6221 | 15.5399 | 20.6061 | 20.3498 | 0.44303 | 2.21E-12  | 3.73E-11  | Up-regulated |
| NM_002294    | LAMP2    | 3920   | 6.4402  | 6.84419 | 9.02085 | 9.06415 | 0.443   | 9.00E-07  | 8.41E-06  | Up-regulated |
| NM_001136537 | BTBD19   | 149478 | 13.4118 | 13.5457 | 19.5827 | 17.4178 | 0.44209 | 0.0028871 | 0.0127433 | Up-regulated |
| NM_001839    | CNN3     | 1266   | 72.2942 | 73.0807 | 98.6285 | 98.3398 | 0.44193 | 3.19E-19  | 8.97E-18  | Up-regulated |
| NM_003344    | UBE2H    | 7328   | 29.7345 | 30.1151 | 40.5935 | 40.4968 | 0.44176 | 1.23E-20  | 3.79E-19  | Up-regulated |
| NM_001037495 | DYNLL1   | 8655   | 29.9766 | 30.3332 | 44.0519 | 38.7507 | 0.44171 | 0.0085281 | 0.0323885 | Up-regulated |
| NR_110912    | KCNC3    | 3748   | 8.15598 | 8.16784 | 11.1527 | 11.0873 | 0.44163 | 9.84E-05  | 0.000635  | Up-regulated |
| NM_016516    | VPS54    | 51542  | 4.36135 | 3.63911 | 5.73356 | 5.3112  | 0.44134 | 0.010251  | 0.0378557 | Up-regulated |
| NM_014687    | RUBCN    | 9711   | 3.45371 | 3.1617  | 4.35427 | 4.66332 | 0.44122 | 0.0001122 | 0.0007153 | Up-regulated |
| NM_004073    | PLK3     | 1263   | 11.3842 | 10.8623 | 15.5228 | 14.8043 | 0.44078 | 0.0001923 | 0.0011621 | Up-regulated |
| NM_005587    | MEF2A    | 4205   | 5.12912 | 6.03496 | 6.80656 | 8.51362 | 0.43994 | 0.0056455 | 0.0227619 | Up-regulated |
| NM_144779    | FXYD5    | 53827  | 27.1113 | 23.8265 | 33.7027 | 36.1855 | 0.43987 | 0.0056318 | 0.0227208 | Up-regulated |
| NM_001007025 | GOSR1    | 9527   | 3.94404 | 4.7425  | 5.71319 | 6.18356 | 0.4396  | 0.0036875 | 0.0157857 | Up-regulated |
| NM_004566    | PFKFB3   | 5209   | 21.1935 | 21.561  | 27.8709 | 30.0423 | 0.43957 | 1.51E-10  | 2.20E-09  | Up-regulated |
| NM_001270448 | ACADVL   | 37     | 24.1973 | 24.3084 | 34.0551 | 31.7186 | 0.43946 | 2.46E-07  | 2.48E-06  | Up-regulated |
| NM_017988    | SCYL2    | 55681  | 10.1045 | 9.41832 | 12.7521 | 13.7408 | 0.43854 | 7.38E-07  | 6.98E-06  | Up-regulated |
| NM_001099666 | PTAR1    | 375743 | 4.90098 | 5.52428 | 6.6938  | 7.47189 | 0.43786 | 4.34E-05  | 0.0003    | Up-regulated |
| NM_001330692 | PSMD4    | 5710   | 13.8878 | 12.1795 | 16.768  | 19.0747 | 0.43777 | 0.0123406 | 0.0442635 | Up-regulated |
| NM_001848    | COL6A1   | 1291   | 91.4678 | 93.586  | 129.965 | 120.103 | 0.43774 | 2.94E-17  | 7.21E-16  | Up-regulated |
| NM_001320973 | BLZF1    | 8548   | 10.0299 | 10.9768 | 13.0942 | 15.6211 | 0.43734 | 0.0020069 | 0.0093301 | Up-regulated |
| NM_019556    | MOSPD1   | 56180  | 8.17511 | 6.55658 | 9.83447 | 10.4004 | 0.43701 | 0.0122427 | 0.0439536 | Up-regulated |
| NM_031431    | COG3     | 83548  | 4.23605 | 4.06986 | 5.75565 | 5.5862  | 0.437   | 0.0014538 | 0.0070891 | Up-regulated |
| NM_001001852 | PIM3     | 415116 | 112.801 | 109.433 | 153.808 | 146.189 | 0.43671 | 7.68E-20  | 2.25E-18  | Up-regulated |
| NR_027409    | GOLGA8A  | 23015  | 6.25844 | 8.20617 | 11.015  | 8.83447 | 0.43638 | 0.0083853 | 0.0319433 | Up-regulated |
| NM_015695    | BRPF3    | 27154  | 6.84585 | 8.10588 | 9.94091 | 10.3774 | 0.43623 | 0.0001459 | 0.0009089 | Up-regulated |
| NM_199424    | WWP2     | 11060  | 13.8099 | 13.1194 | 18.5906 | 17.8886 | 0.43609 | 5.23E-07  | 5.05E-06  | Up-regulated |
| NM_152735    | ZBTB9    | 221504 | 12.5837 | 13.2034 | 17.5471 | 17.413  | 0.43604 | 2.28E-05  | 0.0001672 | Up-regulated |
| NM_144671    | FAM109A  | 144717 | 8.39801 | 8.34683 | 12.8953 | 10.0286 | 0.43563 | 0.0069268 | 0.02711   | Up-regulated |
| NM_001440    | EXTL3    | 2137   | 18.8479 | 20.176  | 26.7061 | 25.9939 | 0.43546 | 2.23E-12  | 3.76E-11  | Up-regulated |
| NM_001135944 | MADD     | 8567   | 3.77203 | 3.56733 | 4.84954 | 5.14785 | 0.43531 | 0.0010934 | 0.0055214 | Up-regulated |
| NM_014784    | ARHGEF11 | 9826   | 7.28856 | 6.00575 | 8.87052 | 9.18415 | 0.43504 | 0.0002941 | 0.0017073 | Up-regulated |
| NM_021260    | ZFYVE1   | 53349  | 11.5828 | 10.804  | 15.369  | 14.9027 | 0.4346  | 6.63E-07  | 6.31E-06  | Up-regulated |
| NM_005953    | MT2A     | 4502   | 4638.28 | 4228.08 | 5858.15 | 6032.36 | 0.43423 | 1.54E-13  | 2.90E-12  | Up-regulated |
| NM_006804    | STARD3   | 10948  | 32.4153 | 34.4642 | 44.5557 | 45.6555 | 0.43394 | 1.10E-10  | 1.62E-09  | Up-regulated |
| NM_005166    | APLP1    | 333    | 10.8033 | 10.9762 | 12.9847 | 16.8258 | 0.43371 | 0.0078691 | 0.0302402 | Up-regulated |
| NM_134269    | SMTN     | 6525   | 13.0181 | 11.9042 | 16.6713 | 17.0225 | 0.43338 | 1.24E-05  | 9.59E-05  | Up-regulated |
| NM_001080482 | C9orf172 | 389813 | 4.72365 | 4.54839 | 6.68269 | 6.02887 | 0.43326 | 0.012506  | 0.0447475 | Up-regulated |
| NM_007049    | BTN2A1   | 11120  | 12.2044 | 10.8597 | 15.8361 | 15.4258 | 0.43318 | 0.0001456 | 0.0009071 | Up-regulated |
| NM_001308248 | EV15     | 7813   | 2.31057 | 2.39613 | 3.36702 | 3.04912 | 0.43315 | 0.0036653 | 0.0157058 | Up-regulated |
| NM_022173    | TIA1     | 7072   | 8.37185 | 7.76697 | 10.4519 | 11.3943 | 0.4331  | 5.48E-05  | 0.0003729 | Up-regulated |
| NM_007200    | AKAP13   | 11214  | 2.40964 | 3.01153 | 3.87141 | 3.50613 | 0.43308 | 0.0023636 | 0.0107321 | Up-regulated |
| NM_001145064 | GATSL2   | 729438 | 2.62539 | 2.70125 | 3.85186 | 3.39651 | 0.43272 | 0.0019961 | 0.009282  | Up-regulated |
| NM_005007    | NFKBIL1  | 4795   | 16.1257 | 14.9215 | 22.1363 | 20.1666 | 0.43271 | 0.0026322 | 0.0117894 | Up-regulated |

|              |               |        |         |         |         |         |         |           |           |              |
|--------------|---------------|--------|---------|---------|---------|---------|---------|-----------|-----------|--------------|
| NM_0006005   | WFS1          | 7466   | 10.6459 | 11.4512 | 15.6771 | 14.2436 | 0.43244 | 5.87E-05  | 0.0003961 | Up-regulated |
| NM_001080424 | KDM6B         | 23135  | 6.77429 | 7.35376 | 9.45958 | 9.62772 | 0.43241 | 1.97E-06  | 1.75E-05  | Up-regulated |
| NM_001099272 | BTBD9         | 114781 | 1.66224 | 1.84427 | 2.29672 | 2.48579 | 0.43235 | 0.0073826 | 0.0286471 | Up-regulated |
| NM_001283    | AP1S1         | 1174   | 294.194 | 277.086 | 383.516 | 384.644 | 0.43212 | 1.27E-21  | 4.10E-20  | Up-regulated |
| NM_001003931 | nerase family | 10039  | 12.3121 | 16.2951 | 18.2704 | 20.831  | 0.43153 | 0.0095377 | 0.0355503 | Up-regulated |
| NM_004844    | SH3BP5        | 9467   | 34.7702 | 34.0323 | 46.687  | 45.9    | 0.43152 | 1.36E-14  | 2.79E-13  | Up-regulated |
| NM_022739    | SMURF2        | 64750  | 4.49615 | 4.24796 | 5.99745 | 5.9048  | 0.43106 | 0.0035933 | 0.0154285 | Up-regulated |
| NM_015374    | SUN2          | 25777  | 90.3918 | 89.1062 | 123.052 | 118.161 | 0.43064 | 5.11E-27  | 2.22E-25  | Up-regulated |
| NM_006769    | LMO4          | 8543   | 11.7411 | 11.9169 | 15.748  | 16.1153 | 0.43012 | 2.74E-09  | 3.45E-08  | Up-regulated |
| NM_183235    | RAB27A        | 5873   | 9.54718 | 11.2568 | 13.2017 | 15.0033 | 0.43002 | 0.0014365 | 0.007018  | Up-regulated |
| NM_001322439 | HNRNP3        | 3189   | 17.1617 | 12.7094 | 19.9072 | 20.8511 | 0.4297  | 0.0080399 | 0.0308162 | Up-regulated |
| NR_037162    | TTL3          | 26140  | 5.10891 | 5.68965 | 7.26235 | 7.39489 | 0.42954 | 0.0013467 | 0.0066381 | Up-regulated |
| NM_032167    | SNX29         | 92017  | 3.68412 | 3.84111 | 5.44865 | 4.74072 | 0.42939 | 0.0005201 | 0.0028458 | Up-regulated |
| NM_015622    | CCZ1          | 51622  | 14.885  | 15.5597 | 19.1788 | 22.0332 | 0.42819 | 0.0016283 | 0.0077918 | Up-regulated |
| NM_001033057 | MAG1          | 9223   | 5.23093 | 4.98808 | 7.29436 | 6.50309 | 0.42804 | 0.0001267 | 0.0007997 | Up-regulated |
| NM_004800    | TM9SF2        | 9375   | 39.3969 | 40.2979 | 53.6445 | 53.2995 | 0.42791 | 5.39E-17  | 1.30E-15  | Up-regulated |
| NM_032246    | MEX3B         | 84206  | 9.70184 | 9.34605 | 12.901  | 12.7903 | 0.42744 | 3.16E-05  | 0.0002249 | Up-regulated |
| NM_016127    | SARAF         | 51669  | 91.4297 | 88.3698 | 120.21  | 120.763 | 0.42673 | 5.86E-20  | 1.73E-18  | Up-regulated |
| NM_002755    | MAP2K1        | 5604   | 46.0985 | 43.214  | 61.038  | 58.8185 | 0.42668 | 3.56E-11  | 5.45E-10  | Up-regulated |
| NM_015603    | CCDC9         | 26093  | 15.456  | 15.3491 | 21.1175 | 20.4029 | 0.42607 | 9.18E-05  | 0.0005946 | Up-regulated |
| NM_003111    | SP3           | 6670   | 6.1876  | 4.94066 | 7.33994 | 7.72757 | 0.42601 | 0.0020866 | 0.0096559 | Up-regulated |
| NM_000158    | GBE1          | 2632   | 35.5527 | 33.9113 | 45.088  | 48.0915 | 0.42591 | 2.53E-10  | 3.61E-09  | Up-regulated |
| NM_016410    | CHMP5         | 51510  | 41.3844 | 38.5198 | 52.7892 | 54.356  | 0.42489 | 8.90E-09  | 1.06E-07  | Up-regulated |
| NM_001297595 | SIN3B         | 23309  | 38.6866 | 37.4551 | 50.2652 | 51.604  | 0.42384 | 1.09E-19  | 3.18E-18  | Up-regulated |
| NM_001252    | CD70          | 970    | 82.0039 | 76.5385 | 99.622  | 113.287 | 0.42362 | 4.81E-05  | 0.0003305 | Up-regulated |
| NM_001281775 | ZMYND8        | 23613  | 3.88346 | 3.74985 | 5.18257 | 5.1139  | 0.4234  | 0.0011192 | 0.0056335 | Up-regulated |
| NM_030939    | C6orf62       | 81688  | 52.9831 | 54.3191 | 71.8639 | 71.6765 | 0.42331 | 1.99E-15  | 4.39E-14  | Up-regulated |
| NM_020820    | PREX1         | 57580  | 17.778  | 18.1049 | 23.9091 | 24.1071 | 0.42327 | 2.54E-15  | 5.53E-14  | Up-regulated |
| NM_012223    | MYO1B         | 4430   | 6.70027 | 6.1182  | 8.21787 | 9.03763 | 0.42319 | 0.0003465 | 0.0019825 | Up-regulated |
| NM_006558    | KHDRB3        | 10656  | 17.0033 | 18.1291 | 23.5964 | 23.6085 | 0.42296 | 8.76E-05  | 0.0005699 | Up-regulated |
| NM_001136265 | IFFO2         | 126917 | 8.18172 | 8.34484 | 11.1283 | 11.0221 | 0.42243 | 3.61E-07  | 3.56E-06  | Up-regulated |
| NM_003811    | TNFSF9        | 8744   | 40.0906 | 39.9116 | 54.5708 | 52.4951 | 0.42232 | 4.13E-08  | 4.56E-07  | Up-regulated |
| NM_001289808 | CRYAB         | 1410   | 70.1982 | 63.1114 | 92.26   | 86.5453 | 0.4222  | 2.11E-05  | 0.0001559 | Up-regulated |
| NM_002654    | PKM           | 5315   | 1216.28 | 1192.1  | 1625.81 | 1589.21 | 0.42181 | 1.26E-44  | 9.70E-43  | Up-regulated |
| NM_001193350 | MEF2C         | 4208   | 7.29038 | 7.52835 | 10.062  | 9.79387 | 0.42178 | 6.93E-07  | 6.58E-06  | Up-regulated |
| NM_032800    | C1orf198      | 84886  | 11.6493 | 11.8335 | 15.7356 | 15.7307 | 0.4215  | 1.60E-06  | 1.44E-05  | Up-regulated |
| NM_000660    | TGFB1         | 7040   | 94.4965 | 95.4647 | 132.796 | 121.085 | 0.4214  | 8.73E-13  | 1.53E-11  | Up-regulated |
| NM_152546    | SRFBP1        | 153443 | 5.48862 | 6.04376 | 8.01568 | 7.61115 | 0.42087 | 0.0080982 | 0.0310106 | Up-regulated |
| NM_005567    | LGALS3BP      | 3959   | 481.922 | 495.122 | 656.507 | 646.716 | 0.42069 | 3.12E-42  | 2.24E-40  | Up-regulated |
| NM_005198    | CHKB          | 1120   | 11.7581 | 12.7161 | 17.3357 | 15.7735 | 0.42032 | 0.0060337 | 0.0240729 | Up-regulated |
| NM_002579    | PALM          | 5064   | 8.60302 | 8.91199 | 12.6842 | 10.9318 | 0.42029 | 0.0025611 | 0.0115168 | Up-regulated |
| NR_135154    | CCNL2         | 81669  | 12.5952 | 13.3791 | 17.4222 | 17.3199 | 0.42025 | 1.53E-08  | 1.78E-07  | Up-regulated |
| NM_015571    | SENP6         | 26054  | 3.72756 | 3.744   | 4.57461 | 5.48472 | 0.41907 | 0.0028385 | 0.0125689 | Up-regulated |
| NM_001024736 | CD276         | 80381  | 155.521 | 152.31  | 212.484 | 197.947 | 0.41901 | 6.03E-19  | 1.65E-17  | Up-regulated |
| NM_001291986 | BRD2          | 6046   | 11.3785 | 8.90072 | 14.0205 | 13.2651 | 0.41832 | 0.0018683 | 0.0087665 | Up-regulated |
| NM_003311    | PHLDA2        | 7262   | 451.056 | 425.539 | 591.809 | 575.259 | 0.4183  | 8.25E-19  | 2.24E-17  | Up-regulated |
| NM_030645    | SH3BP5L       | 80851  | 18.6274 | 18.1571 | 26.1645 | 23.0803 | 0.41829 | 1.57E-05  | 0.0001191 | Up-regulated |
| NM_024295    | DERL1         | 79139  | 22.1598 | 22.1638 | 28.2926 | 30.9133 | 0.41828 | 1.32E-07  | 1.38E-06  | Up-regulated |
| NM_017452    | STAU1         | 6780   | 26.0996 | 23.9446 | 31.3758 | 35.4996 | 0.41732 | 6.49E-06  | 5.31E-05  | Up-regulated |
| NM_000487    | ARSA          | 410    | 10.0745 | 12.0232 | 14.1862 | 15.4586 | 0.41696 | 0.0005463 | 0.0029773 | Up-regulated |
| NM_020960    | GPR107        | 57720  | 6.99076 | 6.60175 | 10.0111 | 8.22427 | 0.41679 | 0.0007852 | 0.0041353 | Up-regulated |
| NM_207354    | ANKRD13D      | 338692 | 14.0248 | 12.8821 | 17.924  | 18.1719 | 0.41678 | 0.0005044 | 0.0027711 | Up-regulated |
| NM_003043    | SLC6A6        | 6533   | 36.3759 | 36.4957 | 47.4512 | 49.5062 | 0.41579 | 4.43E-21  | 1.39E-19  | Up-regulated |
| NM_015255    | UBR2          | 23304  | 4.45779 | 4.34761 | 6.03035 | 5.73328 | 0.41534 | 3.76E-05  | 0.0002637 | Up-regulated |
| NM_001330420 | LUC7L         | 55692  | 5.96748 | 6.7453  | 8.84454 | 8.32272 | 0.41532 | 0.0108079 | 0.0395608 | Up-regulated |
| NM_153365    | TAPT1         | 202018 | 4.53709 | 4.96685 | 6.40855 | 6.34037 | 0.41372 | 0.0018757 | 0.0087968 | Up-regulated |
| NM_015060    | AVL9          | 23080  | 5.84654 | 6.01662 | 7.91154 | 7.89245 | 0.41291 | 3.85E-06  | 3.26E-05  | Up-regulated |
| NM_001261420 | OS9           | 10956  | 48.1848 | 54.0305 | 71.3076 | 64.7486 | 0.41252 | 1.13E-06  | 1.04E-05  | Up-regulated |
| NM_178507    | OAF           | 220323 | 89.9382 | 90.3139 | 123.187 | 116.13  | 0.41244 | 1.26E-13  | 2.38E-12  | Up-regulated |
| NM_003183    | ADAMI7        | 6868   | 13.8009 | 14.368  | 18.8768 | 18.5992 | 0.41229 | 5.46E-08  | 5.95E-07  | Up-regulated |
| NR_033327    | EFHC1         | 114327 | 1.89238 | 1.86328 | 2.51661 | 2.53516 | 0.41219 | 0.013522  | 0.0477747 | Up-regulated |
| NM_012429    | SEC14L2       | 23541  | 4.8233  | 4.39768 | 6.31716 | 6.03842 | 0.41219 | 0.0035731 | 0.0153486 | Up-regulated |
| NM_005229    | ELK1          | 2002   | 15.8924 | 12.2495 | 20.5929 | 17.2818 | 0.4116  | 0.0111074 | 0.0404941 | Up-regulated |
| NM_001078171 | FAM127A       | 8933   | 144.917 | 141.674 | 197.633 | 182.592 | 0.41145 | 3.57E-11  | 5.46E-10  | Up-regulated |
| NM_001080412 | ZBTB38        | 253461 | 7.72677 | 9.03587 | 11.1134 | 11.1994 | 0.41018 | 2.38E-05  | 0.0001739 | Up-regulated |
| NM_004425    | ECM1          | 1893   | 147.806 | 149.973 | 200.286 | 194.075 | 0.40996 | 1.80E-24  | 6.79E-23  | Up-regulated |
| NM_033113    | ZNF628        | 89887  | 7.69099 | 8.93207 | 11.6387 | 10.5616 | 0.40971 | 0.0018152 | 0.0085512 | Up-regulated |
| NM_000291    | PGK1          | 5230   | 427.489 | 413.327 | 550.031 | 562.407 | 0.40886 | 4.49E-35  | 2.53E-33  | Up-regulated |
| NM_005637    | SS18          | 6760   | 14.326  | 15.416  | 19.7332 | 19.7498 | 0.40874 | 4.52E-06  | 3.80E-05  | Up-regulated |
| NM_014399    | TSPAN13       | 27075  | 10.5594 | 10.9901 | 14.4374 | 14.3476 | 0.40867 | 0.0034286 | 0.0148046 | Up-regulated |
| NM_014688    | USP6NL        | 9712   | 3.15495 | 2.93946 | 3.88966 | 4.29123 | 0.40821 | 0.0136715 | 0.0482314 | Up-regulated |
| NM_018310    | BRF2          | 55290  | 12.9699 | 11.5505 | 16.3666 | 16.3429 | 0.4082  | 0.0024983 | 0.0112848 | Up-regulated |
| NM_017983    | WIPI1         | 55062  | 62.197  | 57.4295 | 77.0979 | 81.4224 | 0.4082  | 1.09E-08  | 1.29E-07  | Up-regulated |
| NM_001305043 | TMEM59        | 9528   | 6.67214 | 6.88058 | 8.47442 | 9.51548 | 0.407   | 6.23E-05  | 0.000418  | Up-regulated |
| NM_006618    | KDM5B         | 10765  | 7.94366 | 7.56741 | 10.4067 | 10.1369 | 0.40688 | 4.69E-09  | 5.79E-08  | Up-regulated |
| NM_006380    | APPBP2        | 10513  | 5.06579 | 5.94927 | 7.36359 | 7.31362 | 0.40679 | 0.000713  | 0.0037853 | Up-regulated |
| NM_003205    | TCF12         | 6938   | 10.6404 | 12.5076 | 14.5575 | 16.2348 | 0.40652 | 0.0004824 | 0.0026685 | Up-regulated |
| NM_013451    | MYOF          | 26509  | 15.3938 | 15.9713 | 20.5192 | 20.9672 | 0.4062  | 4.64E-12  | 7.62E-11  | Up-regulated |
| NM_004148    | NINJ1         | 4814   | 35.1008 | 31.2839 | 43.3447 | 44.8666 | 0.40617 | 0.0002774 | 0.0016211 | Up-regulated |
| NM_001308191 | CPEB4         | 80315  | 4.15859 | 5.66408 | 6.51385 | 6.64348 | 0.40613 | 0.0098979 | 0.0366865 | Up-regulated |
| NM_015264    | KIAA0930      | 23313  | 16.3451 | 18.374  | 25.0813 | 21.0334 | 0.40575 | 0.0001601 | 0.0009866 | Up-regulated |
| NM_201575    | SEZ6L2        | 26470  | 17.4158 | 16.8409 | 24.2    | 21.2279 | 0.40565 | 3.35E-05  | 0.000238  | Up-regulated |
| NM_000212    | ITGB3         | 3690   | 134.918 | 144.453 | 188.376 | 180.733 | 0.40556 | 5.56E-17  | 1.34E-15  | Up-regulated |
| NR_015380    | A1BG-AS1      | 503538 | 7.39588 | 7.17458 | 9.71404 | 9.78578 | 0.4054  | 0.0111847 | 0.0407214 | Up-regulated |

|              |               |         |         |         |         |         |         |           |           |              |
|--------------|---------------|---------|---------|---------|---------|---------|---------|-----------|-----------|--------------|
| NM_006134    | TMEM50B       | 757     | 9.5285  | 8.12028 | 12.2292 | 11.395  | 0.40535 | 0.008627  | 0.0326732 | Up-regulated |
| NM_138396    | 9-Mar         | 92979   | 12.641  | 14.4033 | 18.3454 | 17.5887 | 0.40512 | 0.0002858 | 0.0016623 | Up-regulated |
| NM_030961    | TRIM56        | 81844   | 9.59661 | 10.6504 | 13.6852 | 13.1697 | 0.40502 | 3.26E-05  | 0.000232  | Up-regulated |
| NM_031212    | SLC25A28      | 81894   | 16.6225 | 16.3162 | 21.2988 | 22.529  | 0.40452 | 0.0016607 | 0.0079208 | Up-regulated |
| NM_015203    | RPRD2         | 23248   | 2.86088 | 2.84352 | 4.11025 | 3.50105 | 0.40386 | 0.0044004 | 0.0183295 | Up-regulated |
| NM_001130040 | SHC1          | 6464    | 71.2486 | 71.8476 | 95.2742 | 93.4618 | 0.40386 | 1.70E-23  | 6.06E-22  | Up-regulated |
| NM_014713    | LAPTM4A       | 9741    | 183.761 | 176.652 | 236.146 | 239.124 | 0.40377 | 1.51E-22  | 5.08E-21  | Up-regulated |
| NM_016003    | WIPI2         | 26100   | 4.69476 | 4.61511 | 6.14767 | 6.24048 | 0.40375 | 0.0021206 | 0.00978   | Up-regulated |
| NM_022060    | ABHD4         | 63874   | 22.2672 | 22.9491 | 29.1422 | 30.6522 | 0.40339 | 1.30E-06  | 1.19E-05  | Up-regulated |
| NM_015061    | KDM4C         | 23081   | 5.49882 | 5.41567 | 7.59607 | 6.9023  | 0.40313 | 0.0013058 | 0.006461  | Up-regulated |
| NM_001039570 | KREMEN1       | 83999   | 6.51281 | 6.50303 | 8.77282 | 8.44352 | 0.40287 | 1.47E-05  | 0.0001117 | Up-regulated |
| NM_000027    | AGA           | 175     | 15.2306 | 15.3387 | 19.6342 | 20.8925 | 0.40281 | 0.0003226 | 0.0018567 | Up-regulated |
| NM_022152    | TMBIM1        | 64114   | 65.0723 | 67.2857 | 94.1323 | 80.816  | 0.40266 | 2.62E-06  | 2.28E-05  | Up-regulated |
| NM_019006    | ZFAND6        | 54469   | 9.93272 | 9.48891 | 12.1504 | 13.7698 | 0.40196 | 0.0136948 | 0.0483049 | Up-regulated |
| NM_024715    | TXNDC15       | 79770   | 13.043  | 14.1083 | 17.5925 | 18.3121 | 0.40189 | 1.12E-05  | 8.75E-05  | Up-regulated |
| NM_001347    | DGKQ          | 1609    | 10.655  | 12.0664 | 14.967  | 15.097  | 0.40178 | 3.61E-05  | 0.0002539 | Up-regulated |
| NM_002070    | GNAI2         | 2771    | 215.863 | 205.204 | 278.598 | 275.833 | 0.40167 | 5.69E-24  | 2.07E-22  | Up-regulated |
| NM_139273    | CARS          | 833     | 13.0797 | 13.28   | 15.8321 | 19.2247 | 0.40154 | 0.0034765 | 0.0149867 | Up-regulated |
| NM_177441    | TMUB2         | 79089   | 12.0538 | 15.0451 | 16.6056 | 19.5315 | 0.40066 | 0.0118833 | 0.0428161 | Up-regulated |
| NM_017784    | OSBPL10       | 114884  | 10.9287 | 10.3123 | 13.7134 | 14.3418 | 0.40031 | 1.54E-05  | 0.0001165 | Up-regulated |
| NM_015914    | TXNDC11       | 51061   | 11.7397 | 9.68907 | 13.3715 | 15.1371 | 0.40016 | 0.0051612 | 0.0210939 | Up-regulated |
| NM_014888    | FAM3C         | 10447   | 66.1433 | 68.1476 | 88.801  | 87.8909 | 0.40005 | 2.63E-16  | 6.07E-15  | Up-regulated |
| NM_201266    | NRP2          | 8828    | 4.60766 | 5.04434 | 6.82988 | 5.96019 | 0.39993 | 0.0016684 | 0.0079558 | Up-regulated |
| NM_014889    | PITRM1        | 10531   | 22.8706 | 22.4525 | 30.7863 | 28.9491 | 0.39989 | 2.87E-08  | 3.22E-07  | Up-regulated |
| NM_005072    | SLC12A4       | 6560    | 6.89185 | 8.07413 | 10.472  | 9.37807 | 0.3992  | 0.002216  | 0.0101475 | Up-regulated |
| NM_018067    | MAP7D1        | 55700   | 25.7009 | 30.3388 | 38.5712 | 35.4492 | 0.39902 | 7.45E-05  | 0.0004922 | Up-regulated |
| NM_001193417 | DDX3X         | 1654    | 24.0954 | 23.4137 | 32.6146 | 29.9344 | 0.39891 | 1.25E-08  | 1.47E-07  | Up-regulated |
| NM_018045    | BSDC1         | 55108   | 22.6945 | 24.8    | 31.4383 | 31.0933 | 0.3986  | 2.35E-07  | 2.37E-06  | Up-regulated |
| NM_004943    | DMWD          | 1762    | 27.1899 | 25.297  | 36.3857 | 32.7713 | 0.39819 | 3.23E-06  | 2.77E-05  | Up-regulated |
| NM_015292    | ESYT1         | 23344   | 76.8631 | 81.9522 | 107.198 | 101.547 | 0.39781 | 8.42E-14  | 1.63E-12  | Up-regulated |
| NM_001278216 | CDK5RAP3      | 80279   | 18.3337 | 25.6911 | 28.2389 | 30.3516 | 0.39726 | 0.0118092 | 0.0425651 | Up-regulated |
| NM_014302    | SEC61G        | 23480   | 337.986 | 291.908 | 415.515 | 411.711 | 0.39698 | 7.98E-05  | 0.0005242 | Up-regulated |
| NM_002332    | LRP1          | 4035    | 19.0433 | 21.3032 | 27.5421 | 25.519  | 0.39665 | 2.46E-08  | 2.79E-07  | Up-regulated |
| NM_178815    | ARL5B         | 221079  | 5.41887 | 5.79328 | 7.65103 | 7.22582 | 0.39641 | 0.0047226 | 0.0194935 | Up-regulated |
| NM_004292    | RINI          | 9610    | 9.86977 | 10.0764 | 13.4227 | 12.9279 | 0.3963  | 0.0008572 | 0.00447   | Up-regulated |
| NM_004486    | GOLGA2        | 2801    | 24.8002 | 24.5096 | 33.6751 | 31.111  | 0.39604 | 6.73E-09  | 8.18E-08  | Up-regulated |
| NM_001145667 | GLG1          | 2734    | 22.1601 | 23.7916 | 30.6706 | 29.6686 | 0.39597 | 9.08E-13  | 1.59E-11  | Up-regulated |
| NM_018426    | TMEM63B       | 55362   | 28.81   | 30.2247 | 40.0059 | 37.5382 | 0.3957  | 1.85E-08  | 2.13E-07  | Up-regulated |
| NM_001136157 | OTUD5         | 55593   | 19.8045 | 21.1216 | 30.5633 | 23.6047 | 0.39511 | 0.0042301 | 0.0177261 | Up-regulated |
| NM_033396    | TNKS1BP1      | 85456   | 13.8251 | 14.4007 | 19.1659 | 17.9049 | 0.39487 | 8.31E-08  | 8.85E-07  | Up-regulated |
| NM_001243332 | SEZ6L2        | 26470   | 22.628  | 22.5347 | 31.9576 | 27.4541 | 0.39383 | 3.69E-05  | 0.0002589 | Up-regulated |
| NM_016021    | UBE2J1        | 51465   | 12.5121 | 11.48   | 15.1985 | 16.3467 | 0.39379 | 3.28E-05  | 0.0002337 | Up-regulated |
| NM_080840    | PTPRA         | 5786    | 22.4867 | 24.2187 | 31.7386 | 29.592  | 0.39365 | 1.34E-06  | 1.22E-05  | Up-regulated |
| NM_004429    | EFNB1         | 1947    | 7.28108 | 6.74389 | 10.0614 | 8.52995 | 0.39346 | 0.0086214 | 0.0326584 | Up-regulated |
| NM_006187    | OAS3          | 4940    | 21.287  | 20.2461 | 27.1746 | 27.2384 | 0.39296 | 3.30E-13  | 6.04E-12  | Up-regulated |
| NM_005763    | AASS          | 10157   | 5.46232 | 5.96918 | 7.33667 | 7.7014  | 0.39245 | 0.0003658 | 0.0020801 | Up-regulated |
| NM_015015    | KDM4B         | 23030   | 11.995  | 11.4284 | 16.0302 | 14.6994 | 0.39224 | 3.24E-06  | 2.78E-05  | Up-regulated |
| NM_004261    | SELENOF       | 9403    | 92.2344 | 87.5455 | 117.112 | 118.201 | 0.39224 | 5.75E-13  | 1.03E-11  | Up-regulated |
| NM_012257    | HBP1          | 26959   | 27.4408 | 20.4101 | 31.6828 | 31.5385 | 0.39188 | 0.0055929 | 0.0225941 | Up-regulated |
| NM_032595    | PPP1R9B       | 84687   | 46.6119 | 48.5348 | 63.9973 | 60.5352 | 0.39168 | 8.60E-13  | 1.51E-11  | Up-regulated |
| NM_001098534 | BAG6          | 7917    | 25.267  | 29.2679 | 34.8696 | 36.7015 | 0.39164 | 1.73E-05  | 0.0001295 | Up-regulated |
| NM_177968    | PPM1B         | 5495    | 5.6088  | 5.99879 | 7.93138 | 7.39777 | 0.39157 | 0.0033441 | 0.0144792 | Up-regulated |
| NM_020825    | CRAMP1        | 57585   | 4.2353  | 4.54609 | 5.81904 | 5.72326 | 0.39155 | 0.0001879 | 0.0011374 | Up-regulated |
| NM_000314    | PTEN          | 5728    | 5.43162 | 5.59553 | 6.80299 | 7.68541 | 0.3914  | 0.0001055 | 0.0006768 | Up-regulated |
| NM_002292    | LAMB2         | 3913    | 56.8779 | 59.2035 | 77.3098 | 74.53   | 0.39136 | 4.93E-19  | 1.36E-17  | Up-regulated |
| NM_012308    | KDM2A         | 22992   | 4.08798 | 3.98143 | 5.36793 | 5.22686 | 0.39119 | 0.0002836 | 0.001651  | Up-regulated |
| NM_001308068 | FLYWCH1       | 84256   | 12.579  | 13.4148 | 16.6585 | 17.4252 | 0.39115 | 9.64E-07  | 8.96E-06  | Up-regulated |
| NM_00114394  | ase D4, non-c | 167153  | 7.23036 | 7.15526 | 9.80904 | 9.14841 | 0.39055 | 0.0015386 | 0.0074255 | Up-regulated |
| NM_006285    | TESK1         | 7016    | 9.81728 | 8.79946 | 12.7564 | 11.8083 | 0.39052 | 0.0052469 | 0.0213984 | Up-regulated |
| NM_012328    | member B9(C   | 4189    | 16.2985 | 14.4177 | 19.5868 | 20.8005 | 0.39052 | 0.0005915 | 0.0031994 | Up-regulated |
| NM_006270    | ogene homol   | 6237    | 55.8468 | 56.9182 | 74.945  | 72.6959 | 0.39044 | 1.81E-05  | 0.0001355 | Up-regulated |
| NM_001040456 | RHBDD2        | 57414   | 35.2559 | 35.0586 | 47.3835 | 44.6665 | 0.38963 | 2.27E-06  | 1.99E-05  | Up-regulated |
| NR_027064    | TINCR         | 257000  | 7.50983 | 7.29567 | 9.53556 | 9.90658 | 0.389   | 0.0007387 | 0.0039153 | Up-regulated |
| NM_015226    | CLEC16A       | 23274   | 6.31325 | 6.12857 | 8.36152 | 7.9446  | 0.38898 | 2.23E-05  | 0.0001635 | Up-regulated |
| NM_152637    | METTL7B       | 196410  | 18.439  | 20.1313 | 26.9492 | 23.7974 | 0.3889  | 0.0046498 | 0.0192385 | Up-regulated |
| NM_014705    | DOCK4         | 9732    | 3.46869 | 3.34464 | 4.44613 | 4.50255 | 0.38889 | 0.0004085 | 0.0022993 | Up-regulated |
| NM_183006    | DLGAP4        | 22839   | 30.4541 | 29.1987 | 40.7763 | 37.2293 | 0.38881 | 8.21E-08  | 8.76E-07  | Up-regulated |
| NM_001100878 | MROH6         | 642475  | 5.67412 | 5.70186 | 6.97292 | 8.06999 | 0.38861 | 0.0132856 | 0.0470438 | Up-regulated |
| NM_004039    | ANXA2         | 302     | 455.551 | 433.651 | 573.006 | 586.458 | 0.38803 | 6.57E-23  | 2.26E-21  | Up-regulated |
| NM_022370    | ROBO3         | 64221   | 5.17832 | 5.61187 | 7.32271 | 6.8579  | 0.38712 | 0.0025932 | 0.0116391 | Up-regulated |
| NM_016306    | member B11(C  | 51726   | 115.222 | 115.283 | 148.744 | 151.733 | 0.38693 | 6.24E-17  | 1.50E-15  | Up-regulated |
| NM_033018    | CDK16         | 5127    | 9.27148 | 8.85149 | 12.809  | 10.9856 | 0.38674 | 0.003527  | 0.0151782 | Up-regulated |
| NM_201566    | SLC16A13      | 201232  | 13.9743 | 15.6214 | 20.1379 | 18.8012 | 0.38662 | 0.004881  | 0.0200609 | Up-regulated |
| NM_015050    | CMTR1         | 23070   | 17.589  | 18.2442 | 24.4758 | 22.3321 | 0.38592 | 2.62E-06  | 2.28E-05  | Up-regulated |
| NM_007247    | SYNRG         | 11276   | 3.36376 | 2.92036 | 3.8884  | 4.37871 | 0.38557 | 0.006122  | 0.024354  | Up-regulated |
| NM_032270    | LRRC8C        | 84230   | 5.84804 | 5.69214 | 7.35838 | 7.73052 | 0.38512 | 3.20E-05  | 0.0002277 | Up-regulated |
| NM_181864    | ACOT7         | 11332   | 149.754 | 131.97  | 179.956 | 187.291 | 0.38498 | 1.24E-07  | 1.30E-06  | Up-regulated |
| NM_015599    | PGM3          | 5238    | 4.01667 | 3.41769 | 4.79721 | 4.96663 | 0.38407 | 0.0073445 | 0.0285341 | Up-regulated |
| NM_014603    | CDR2L         | 30850   | 14.0214 | 13.4857 | 18.261  | 17.6572 | 0.38404 | 1.03E-05  | 8.07E-05  | Up-regulated |
| NR_123722    | CDIP6-NPIPI   | 1.1E+08 | 7.38589 | 6.95026 | 8.78349 | 10.0648 | 0.384   | 0.0103879 | 0.038243  | Up-regulated |
| NM_022763    | FNDC3B        | 64778   | 12.3253 | 10.4779 | 15.7815 | 14.035  | 0.38356 | 0.0003826 | 0.0021653 | Up-regulated |
| NM_198941    | SERINC3       | 10955   | 22.8034 | 28.4091 | 33.1034 | 34.0502 | 0.3833  | 0.004167  | 0.0174883 | Up-regulated |
| NM_015270    | ADCY6         | 112     | 14.9512 | 15.5643 | 19.7304 | 19.9949 | 0.38321 | 9.12E-10  | 1.21E-08  | Up-regulated |
| NM_001113496 | 9-Sep         | 10801   | 13.5142 | 11.7602 | 17.9279 | 15.2046 | 0.38318 | 0.0040569 | 0.0171154 | Up-regulated |



|              |                |        |         |         |         |         |         |           |           |              |
|--------------|----------------|--------|---------|---------|---------|---------|---------|-----------|-----------|--------------|
| NM_001288    | CLIC1          | 1192   | 415.072 | 398.132 | 532.776 | 523.624 | 0.38298 | 3.31E-23  | 1.16E-21  | Up-regulated |
| NM_020376    | PNPLA2         | 57104  | 63.5532 | 66.5176 | 85.157  | 84.0123 | 0.38286 | 6.99E-13  | 1.24E-11  | Up-regulated |
| NM_017721    | CC2D1A         | 54862  | 29.7265 | 30.1704 | 39.9215 | 38.0195 | 0.38286 | 4.11E-10  | 5.70E-09  | Up-regulated |
| NM_001330740 | RUSC2          | 9853   | 6.74704 | 6.65206 | 8.38653 | 9.16736 | 0.38265 | 0.0040432 | 0.0170768 | Up-regulated |
| NM_032717    | GPAT3          | 84803  | 8.5343  | 10.4498 | 12.9002 | 12.067  | 0.38205 | 0.0121637 | 0.0437112 | Up-regulated |
| NM_003651    | YBX3           | 8531   | 77.94   | 73.6316 | 100.649 | 96.3869 | 0.38176 | 1.89E-10  | 2.74E-09  | Up-regulated |
| NM_174858    | AK5            | 26289  | 9.50668 | 9.41674 | 12.5216 | 12.173  | 0.38141 | 0.0003791 | 0.002146  | Up-regulated |
| NM_002510    | GPNMB          | 10457  | 261.037 | 259.626 | 335.009 | 340.636 | 0.38101 | 4.07E-39  | 2.62E-37  | Up-regulated |
| NM_001253845 | ADM2           | 79924  | 6.01237 | 6.22203 | 7.83666 | 8.14963 | 0.38094 | 0.0019078 | 0.0089254 | Up-regulated |
| NR_144568    | NR_144568      | NA     | 3.63506 | 4.58531 | 5.00885 | 5.79432 | 0.38053 | 0.0135249 | 0.0477759 | Up-regulated |
| NM_000476    | AK1            | 203    | 21.3302 | 20.0432 | 27.5397 | 26.2809 | 0.37998 | 5.89E-05  | 0.0003969 | Up-regulated |
| NM_203304    | MEX3D          | 399664 | 17.3226 | 19.8298 | 24.6948 | 23.7354 | 0.37992 | 0.0002358 | 0.0013961 | Up-regulated |
| NM_016211    | SEC31A         | 22872  | 12.6002 | 15.899  | 18.972  | 18.2859 | 0.37974 | 0.0025198 | 0.0113578 | Up-regulated |
| NM_182919    | TICAM1         | 148022 | 12.5762 | 11.4089 | 15.9077 | 15.3533 | 0.37898 | 0.0009617 | 0.0049368 | Up-regulated |
| NM_017636    | TRPM4          | 54795  | 10.2667 | 9.7509  | 14.3116 | 11.8439 | 0.37874 | 0.0029697 | 0.0130504 | Up-regulated |
| NM_173079    | RUNDC1         | 146923 | 8.19536 | 8.18271 | 11.4457 | 9.93961 | 0.37866 | 0.0024    | 0.0108899 | Up-regulated |
| NM_002586    | PBX2           | 5089   | 27.5597 | 29.4475 | 37.0955 | 36.8995 | 0.37852 | 3.19E-08  | 3.56E-07  | Up-regulated |
| NM_001029896 | WDR45          | 11152  | 45.685  | 46.7935 | 61.1173 | 58.8963 | 0.37823 | 3.14E-07  | 3.11E-06  | Up-regulated |
| NM_001195605 | ZNF865         | 1E+08  | 8.745   | 8.92974 | 12.4168 | 10.6191 | 0.37804 | 0.0009473 | 0.0048785 | Up-regulated |
| NM_001130991 | HYOU1          | 10525  | 43.7061 | 43.0197 | 58.6204 | 53.8269 | 0.37783 | 2.72E-10  | 3.87E-09  | Up-regulated |
| NM_004954    | MARK2          | 2011   | 5.20369 | 4.91779 | 7.09125 | 6.15451 | 0.37781 | 0.0080965 | 0.0310106 | Up-regulated |
| NM_015329    | MAU2           | 23383  | 12.1112 | 13.4043 | 16.6729 | 16.4817 | 0.37776 | 1.30E-05  | 9.99E-05  | Up-regulated |
| NM_002397    | MEF2C          | 4208   | 8.99771 | 8.08823 | 11.0237 | 11.1771 | 0.37743 | 2.86E-05  | 0.0002056 | Up-regulated |
| NM_020728    | ESYT2          | 57488  | 16.9114 | 17.5132 | 22.3357 | 22.2913 | 0.37735 | 1.93E-10  | 2.78E-09  | Up-regulated |
| NM_181453    | GCC2           | 9648   | 5.39333 | 5.53446 | 7.18673 | 7.02463 | 0.37724 | 7.11E-05  | 0.0004722 | Up-regulated |
| NM_002633    | PGM1           | 5236   | 59.3917 | 56.79   | 74.5263 | 75.9814 | 0.37712 | 6.40E-12  | 1.04E-10  | Up-regulated |
| NM_019050    | USP53          | 54532  | 12.5929 | 13.2608 | 16.2361 | 17.2934 | 0.37706 | 2.11E-07  | 2.14E-06  | Up-regulated |
| NM_153252    | BRWD3          | 254065 | 2.04523 | 2.35897 | 2.76481 | 2.98608 | 0.37697 | 0.0041212 | 0.0173447 | Up-regulated |
| NM_152600    | ZNF579         | 163033 | 37.8922 | 37.1295 | 49.9754 | 47.2717 | 0.3769  | 1.69E-07  | 1.74E-06  | Up-regulated |
| NM_014909    | VASH1          | 22846  | 6.96296 | 7.33484 | 9.73843 | 8.85801 | 0.37686 | 0.0002042 | 0.0012275 | Up-regulated |
| NM_012129    | CLDN12         | 9069   | 15.3709 | 18.4494 | 20.9809 | 23.0654 | 0.37677 | 0.0013335 | 0.0065802 | Up-regulated |
| NM_001322250 | MSI2           | 124540 | 10.9717 | 11.9051 | 14.4665 | 15.2253 | 0.37676 | 3.02E-06  | 2.60E-05  | Up-regulated |
| NM_022075    | CERS2          | 29956  | 82.8394 | 81.5523 | 109.214 | 103.526 | 0.37605 | 1.35E-13  | 2.56E-12  | Up-regulated |
| NM_001194    | HCN2           | 610    | 19.7967 | 20.3148 | 26.0919 | 25.8746 | 0.376   | 1.67E-07  | 1.73E-06  | Up-regulated |
| NM_138455    | CTHRC1         | 115908 | 67.1417 | 68.5663 | 87.8444 | 87.8542 | 0.37595 | 4.77E-08  | 5.24E-07  | Up-regulated |
| NM_001042442 | CAST           | 831    | 7.70262 | 9.76792 | 11.327  | 11.491  | 0.37582 | 0.0067857 | 0.026634  | Up-regulated |
| NM_001129995 | KCTD15         | 79047  | 14.4402 | 13.3188 | 16.0851 | 20.0922 | 0.37523 | 0.003994  | 0.0169135 | Up-regulated |
| NM_000836    | GRIN2D         | 2906   | 11.0941 | 11.9181 | 15.5407 | 14.3166 | 0.37512 | 3.59E-05  | 0.0002526 | Up-regulated |
| NM_001853    | COL9A3         | 1299   | 281.133 | 290.384 | 380.29  | 358.625 | 0.37505 | 1.60E-17  | 3.99E-16  | Up-regulated |
| NM_004860    | FXR2           | 9513   | 67.6949 | 68.3373 | 87.1186 | 88.7522 | 0.37491 | 1.82E-17  | 4.54E-16  | Up-regulated |
| NM_016354    | SLCO4A1        | 28231  | 16.6216 | 16.0929 | 21.3203 | 21.1085 | 0.37484 | 2.81E-05  | 0.0002023 | Up-regulated |
| NM_006116    | binding prote  | 10454  | 16.7965 | 16.9581 | 22.23   | 21.4681 | 0.37418 | 4.54E-06  | 3.82E-05  | Up-regulated |
| NM_003972    | BTA1F1         | 9044   | 6.36798 | 7.45338 | 8.86364 | 9.08931 | 0.3741  | 0.0005863 | 0.0031743 | Up-regulated |
| NM_019052    | CCHCR1         | 54535  | 12.6488 | 12.3912 | 17.2883 | 15.2856 | 0.37402 | 0.0018751 | 0.0087966 | Up-regulated |
| NM_022818    | MAP1LC3B       | 81631  | 66.678  | 62.1257 | 82.8489 | 83.662  | 0.37377 | 3.02E-10  | 4.26E-09  | Up-regulated |
| NM_001077415 | CRELD1         | 78987  | 22.5228 | 20.359  | 28.9863 | 26.6939 | 0.37372 | 0.0004176 | 0.0023454 | Up-regulated |
| NM_001924    | GADD45A        | 1647   | 61.7936 | 60.9051 | 80.7806 | 77.8475 | 0.37356 | 1.30E-07  | 1.35E-06  | Up-regulated |
| NM_199072    | MDFIC          | 29969  | 15.4282 | 15.6245 | 19.6308 | 20.5344 | 0.37343 | 2.53E-08  | 2.86E-07  | Up-regulated |
| NM_004945    | DNM2           | 1785   | 13.5887 | 12.7141 | 15.3362 | 18.8857 | 0.37323 | 0.0038163 | 0.016262  | Up-regulated |
| NM_014666    | CLINT1         | 9685   | 12.0587 | 12.1169 | 16.7335 | 14.6324 | 0.37303 | 0.0003841 | 0.0021726 | Up-regulated |
| NM_001101662 | NRDC           | 4898   | 47.6418 | 46.6037 | 59.1133 | 62.6066 | 0.37269 | 2.81E-12  | 4.68E-11  | Up-regulated |
| NM_016357    | LIMA1          | 51474  | 7.66239 | 7.43069 | 9.82206 | 9.7505  | 0.3724  | 0.0009976 | 0.005102  | Up-regulated |
| NM_001166271 | SPATA13        | 221178 | 6.50896 | 8.04396 | 9.26469 | 9.63917 | 0.37227 | 0.0017574 | 0.0083278 | Up-regulated |
| NM_001040125 | PQLC2          | 54896  | 17.8585 | 20.2571 | 26.1307 | 23.3718 | 0.37224 | 0.0018804 | 0.0088083 | Up-regulated |
| NM_006696    | BRD8           | 10902  | 10.9791 | 10.7853 | 14.6146 | 13.5928 | 0.37205 | 0.0004666 | 0.0025919 | Up-regulated |
| NM_003660    | PPF1A3         | 8541   | 14.0033 | 14.4075 | 18.6384 | 18.0812 | 0.37171 | 3.67E-07  | 3.62E-06  | Up-regulated |
| NM_005981    | TSPAN31        | 6302   | 18.8001 | 20.9125 | 25.8915 | 25.6441 | 0.37169 | 0.0013815 | 0.0067946 | Up-regulated |
| NM_025158    | RUFY1          | 80230  | 9.68702 | 9.34212 | 12.0232 | 12.6828 | 0.37067 | 0.0030916 | 0.0135052 | Up-regulated |
| NM_014584    | ERO1A          | 30001  | 22.5002 | 24.0252 | 29.3042 | 30.7438 | 0.37067 | 7.38E-09  | 8.91E-08  | Up-regulated |
| NM_130443    | DPP3           | 10072  | 10.522  | 10.6493 | 13.4572 | 13.928  | 0.36999 | 0.0004997 | 0.00275   | Up-regulated |
| NM_030791    | SGPP1          | 81537  | 5.73522 | 6.03757 | 7.36669 | 7.95596 | 0.36946 | 0.0098896 | 0.0366629 | Up-regulated |
| NM_182965    | SPHK1          | 8877   | 24.6768 | 23.5145 | 30.7646 | 31.4419 | 0.36945 | 1.89E-05  | 0.0001406 | Up-regulated |
| NM_001042610 | DBNDD1         | 79007  | 69.314  | 70.8512 | 90.4972 | 89.9854 | 0.36895 | 4.36E-13  | 7.89E-12  | Up-regulated |
| NM_005994    | TBX2           | 6909   | 19.9565 | 20.1454 | 25.6583 | 26.0409 | 0.3688  | 2.64E-07  | 2.64E-06  | Up-regulated |
| NM_018638    | ETNK1          | 55500  | 31.6853 | 33.7418 | 41.3375 | 42.9383 | 0.36874 | 3.52E-12  | 5.82E-11  | Up-regulated |
| NM_002668    | PLP2           | 5355   | 222.15  | 213.852 | 285.614 | 275.313 | 0.36869 | 5.27E-13  | 9.48E-12  | Up-regulated |
| NM_0022749   | FAM160B2       | 64760  | 11.6427 | 13.0812 | 16.2536 | 15.709  | 0.36856 | 0.0003187 | 0.0018369 | Up-regulated |
| NM_031412    | GABARAPL1      | 23710  | 59.0596 | 54.9418 | 72.5486 | 74.3549 | 0.36845 | 6.40E-08  | 6.91E-07  | Up-regulated |
| NM_153607    | CREBRF         | 153222 | 3.2925  | 3.5694  | 4.45193 | 4.44507 | 0.36818 | 0.0019684 | 0.0091709 | Up-regulated |
| NM_001319661 | TMEM263        | 90488  | 15.2497 | 14.238  | 18.0776 | 20.0328 | 0.368   | 0.0002689 | 0.0015738 | Up-regulated |
| NM_014365    | member 8(H     | 26353  | 54.7602 | 51.7716 | 64.4502 | 72.7846 | 0.36637 | 1.64E-05  | 0.0001234 | Up-regulated |
| NM_004890    | SPAG7          | 9552   | 84.1435 | 79.1334 | 104.475 | 105.631 | 0.36629 | 2.18E-06  | 1.93E-05  | Up-regulated |
| NM_017684    | VPS13C         | 54832  | 4.1089  | 4.56345 | 5.64037 | 5.54458 | 0.36627 | 3.93E-05  | 0.0002747 | Up-regulated |
| NM_001320034 | GRAMD1A        | 57655  | 34.2443 | 33.9548 | 43.9942 | 43.7146 | 0.36597 | 5.13E-09  | 6.31E-08  | Up-regulated |
| NM_017455    | NPTN           | 27020  | 69.4137 | 66.6435 | 84.5571 | 90.3897 | 0.36568 | 6.00E-09  | 7.32E-08  | Up-regulated |
| NM_003443    | ZBTB17         | 7709   | 12.8924 | 12.7883 | 17.0992 | 16.0317 | 0.36523 | 0.0005682 | 0.0030861 | Up-regulated |
| NM_016121    | KCTD3          | 51133  | 17.3115 | 18.2852 | 22.1676 | 23.63   | 0.36507 | 4.54E-06  | 3.82E-05  | Up-regulated |
| NM_001303620 | DNASE1L1       | 1774   | 7.26341 | 7.02324 | 9.65136 | 8.88479 | 0.36495 | 0.0140547 | 0.0493647 | Up-regulated |
| NM_001080419 | UNK            | 85451  | 14.6415 | 15.061  | 18.9247 | 19.2837 | 0.36471 | 3.55E-06  | 3.03E-05  | Up-regulated |
| NM_000512    | )-6-sulfatase( | 2588   | 21.4577 | 20.3715 | 27.2247 | 26.5928 | 0.36439 | 4.37E-05  | 0.000302  | Up-regulated |
| NM_014997    | KLHDC10        | 23008  | 8.87311 | 9.21433 | 11.4683 | 11.8004 | 0.36438 | 3.24E-06  | 2.78E-05  | Up-regulated |
| NM_001004431 | METRNL         | 284207 | 21.2098 | 21.2056 | 26.7699 | 27.8902 | 0.36434 | 0.0009074 | 0.0046998 | Up-regulated |
| NM_015669    | PCDHB5         | 26167  | 15.0169 | 14.0313 | 18.1071 | 19.3224 | 0.3642  | 0.0002998 | 0.0017368 | Up-regulated |
| NM_181887    | UBE2D3         | 7323   | 6.589   | 6.42279 | 8.68659 | 8.12739 | 0.36413 | 0.0030453 | 0.0133332 | Up-regulated |

|              |               |        |         |         |         |         |         |           |           |              |
|--------------|---------------|--------|---------|---------|---------|---------|---------|-----------|-----------|--------------|
| NM_019107    | MYDGF         | 56005  | 189.914 | 189.553 | 244.743 | 241.729 | 0.36397 | 3.26E-14  | 6.54E-13  | Up-regulated |
| NM_012255    | XRN2          | 22803  | 20.2449 | 19.3472 | 25.9044 | 24.9729 | 0.36336 | 1.38E-06  | 1.26E-05  | Up-regulated |
| NM_014991    | WDFY3         | 23001  | 2.35372 | 2.43899 | 3.07135 | 3.10287 | 0.36326 | 0.0002663 | 0.0015599 | Up-regulated |
| NM_018445    | SELENOS       | 55829  | 78.0489 | 77.8965 | 102.953 | 97.1567 | 0.3632  | 1.89E-07  | 1.94E-06  | Up-regulated |
| NM_139062    | CSNK1D        | 1453   | 32.7673 | 33.6841 | 43.5484 | 41.7297 | 0.36313 | 4.27E-10  | 5.89E-09  | Up-regulated |
| NM_002270    | TNPO1         | 3842   | 11.3537 | 13.4743 | 16.8552 | 15.1269 | 0.36281 | 0.0005332 | 0.0029125 | Up-regulated |
| NM_018368    | LMBRD1        | 55788  | 19.2825 | 16.6995 | 22.9566 | 23.4002 | 0.36248 | 0.0013861 | 0.0068118 | Up-regulated |
| NM_014345    | ZNF318        | 24149  | 5.34381 | 5.6948  | 7.27488 | 6.92362 | 0.36247 | 0.0001216 | 0.0007698 | Up-regulated |
| NM_022365    | member C1(I   | 64215  | 14.0797 | 13.2544 | 17.838  | 17.3788 | 0.3619  | 0.0024657 | 0.0111614 | Up-regulated |
| NM_004519    | KCNQ3         | 3786   | 1.90078 | 2.05717 | 2.52466 | 2.5887  | 0.36127 | 0.0053312 | 0.0217008 | Up-regulated |
| NM_001172    | ARG2          | 384    | 14.0453 | 13.1847 | 18.0563 | 17.0003 | 0.36073 | 0.0043744 | 0.0182372 | Up-regulated |
| NM_021005    | NR2F2         | 7026   | 6.17406 | 6.76252 | 8.39663 | 8.24382 | 0.36028 | 0.0010935 | 0.0055214 | Up-regulated |
| NM_001318734 | KLC2          | 64837  | 20.3955 | 17.3964 | 25.1718 | 23.4341 | 0.36022 | 0.0011004 | 0.0055534 | Up-regulated |
| NM_002319    | LRCH4         | 4034   | 22.2157 | 24.0615 | 29.3681 | 29.9571 | 0.35974 | 3.57E-06  | 3.04E-05  | Up-regulated |
| NR_104023    | ARFGAP1       | 55738  | 33.165  | 37.7314 | 43.2543 | 47.7115 | 0.35946 | 8.93E-05  | 0.0005802 | Up-regulated |
| NM_004838    | HOMER3        | 9454   | 78.8465 | 81.0178 | 103.973 | 100.537 | 0.3594  | 1.28E-09  | 1.67E-08  | Up-regulated |
| NM_018000    | MREG          | 55686  | 27.4366 | 27.0529 | 33.2798 | 36.5052 | 0.35873 | 2.88E-06  | 2.49E-05  | Up-regulated |
| NM_002231    | CD82          | 3732   | 23.395  | 24.1546 | 32.234  | 28.8607 | 0.35856 | 0.0013934 | 0.0068404 | Up-regulated |
| NM_001320214 | SRSF5         | 6430   | 67.9782 | 61.6322 | 80.1901 | 85.7752 | 0.35849 | 1.26E-05  | 9.72E-05  | Up-regulated |
| NM_001111067 | ACVR1         | 90     | 10.161  | 9.62272 | 12.306  | 13.1272 | 0.35829 | 0.0028356 | 0.012565  | Up-regulated |
| NM_183001    | SHC1          | 6464   | 35.974  | 33.1945 | 47.9653 | 40.6843 | 0.35677 | 0.0002523 | 0.0014857 | Up-regulated |
| NM_015132    | SNX13         | 23161  | 3.5528  | 3.2087  | 4.19904 | 4.50837 | 0.35651 | 0.0102638 | 0.0378958 | Up-regulated |
| NM_001080495 | TNRC18        | 84629  | 19.4319 | 20.5131 | 27.0518 | 24.0234 | 0.35632 | 1.06E-06  | 9.80E-06  | Up-regulated |
| NM_001270733 | BCL2L13       | 23786  | 8.92491 | 9.20972 | 10.7054 | 12.5825 | 0.35628 | 0.0031215 | 0.0136013 | Up-regulated |
| NM_020663    | RHOJ          | 57381  | 11.1006 | 10.9453 | 13.6789 | 14.5262 | 0.35589 | 0.0002806 | 0.0016366 | Up-regulated |
| NM_013318    | PRRC2B        | 84726  | 16.0471 | 16.7415 | 21.2571 | 20.5958 | 0.35584 | 2.71E-12  | 4.53E-11  | Up-regulated |
| NM_005899    | NBR1          | 4077   | 29.2859 | 28.1829 | 37.1658 | 36.1968 | 0.35578 | 4.56E-11  | 6.92E-10  | Up-regulated |
| NM_007059    | KPTN          | 11133  | 12.8422 | 11.8507 | 15.7118 | 16.0659 | 0.35574 | 0.0139307 | 0.0489828 | Up-regulated |
| NM_015404    | WHRN          | 25861  | 8.17596 | 8.17903 | 10.6322 | 10.3044 | 0.35572 | 0.0006342 | 0.0034078 | Up-regulated |
| NM_138400    | NOM1          | 64434  | 4.428   | 5.1476  | 6.28057 | 6.01441 | 0.35509 | 0.0062896 | 0.0249327 | Up-regulated |
| NM_002035    | KDSR          | 2531   | 13.5466 | 13.1198 | 17.1533 | 16.9045 | 0.355   | 5.67E-07  | 5.44E-06  | Up-regulated |
| NM_015284    | mouse)(SZT2   | 23334  | 3.7186  | 4.37814 | 5.46238 | 4.92242 | 0.35491 | 0.0020238 | 0.0094018 | Up-regulated |
| NM_001431    | EPB41L2       | 2037   | 14.7932 | 14.0861 | 17.9982 | 18.8748 | 0.3545  | 6.13E-06  | 5.04E-05  | Up-regulated |
| NM_001199839 | BCL2L2        | 599    | 10.2807 | 10.8174 | 14.0069 | 12.9955 | 0.35433 | 0.0008002 | 0.0041947 | Up-regulated |
| NM_003826    | NAPG          | 8774   | 6.51584 | 6.65278 | 8.34338 | 8.56652 | 0.35425 | 0.0039166 | 0.0166189 | Up-regulated |
| NM_015946    | osophila)(PEI | 53918  | 20.5165 | 20.6587 | 26.3516 | 26.1977 | 0.35383 | 3.82E-06  | 3.24E-05  | Up-regulated |
| NM_006164    | NFE2L2        | 4780   | 23.5489 | 23.7526 | 29.5517 | 30.8015 | 0.3537  | 2.20E-06  | 1.94E-05  | Up-regulated |
| NM_024038    | C19orf43      | 79002  | 297.112 | 277.733 | 355.466 | 376.58  | 0.3537  | 2.69E-09  | 3.40E-08  | Up-regulated |
| NM_022572    | PNKD          | 25953  | 10.3188 | 10.0307 | 13.2159 | 12.837  | 0.35365 | 0.0014591 | 0.0071003 | Up-regulated |
| NM_015000    | STK38L        | 23012  | 6.70473 | 6.80757 | 8.22019 | 9.08406 | 0.35301 | 0.0014555 | 0.0070906 | Up-regulated |
| NM_001958    | EEF1A2        | 1917   | 63.6779 | 61.448  | 81.4664 | 77.9376 | 0.35296 | 5.50E-09  | 6.75E-08  | Up-regulated |
| NM_006026    | HIFX          | 8971   | 109.32  | 108.604 | 138.065 | 139.285 | 0.3525  | 1.62E-12  | 2.78E-11  | Up-regulated |
| NM_022481    | ARAP3         | 64411  | 13.9396 | 14.4987 | 18.7832 | 17.4777 | 0.35217 | 5.26E-06  | 4.37E-05  | Up-regulated |
| NM_002869    | RAB6A         | 5870   | 22.996  | 24.0781 | 31.2499 | 28.7702 | 0.35185 | 9.17E-06  | 7.28E-05  | Up-regulated |
| NM_012090    | MACF1         | 23499  | 17.096  | 17.4858 | 22.1764 | 21.8156 | 0.35147 | 3.35E-20  | 1.01E-18  | Up-regulated |
| NM_0033103   | RHPN2         | 85415  | 10.6428 | 10.3847 | 12.9857 | 13.8371 | 0.35054 | 0.000623  | 0.0033532 | Up-regulated |
| NM_000365    | TPII          | 7167   | 425.989 | 415.536 | 541.597 | 527.068 | 0.35024 | 8.80E-23  | 3.00E-21  | Up-regulated |
| NM_020137    | GRIPAP1       | 56850  | 15.6448 | 16.6546 | 21.3414 | 19.8638 | 0.35022 | 0.0002578 | 0.0015149 | Up-regulated |
| NM_001042678 | RHOC          | 389    | 136.931 | 131.875 | 166.524 | 175.052 | 0.34996 | 7.77E-10  | 1.04E-08  | Up-regulated |
| NM_001204301 | APP           | 351    | 12.4116 | 10.3446 | 15.5706 | 13.584  | 0.3499  | 0.0104021 | 0.038266  | Up-regulated |
| NM_001199456 | BRD2          | 6046   | 18.2781 | 16.9501 | 21.127  | 23.8221 | 0.34981 | 0.0005782 | 0.0031349 | Up-regulated |
| NM_199054    | MKNK2         | 2872   | 20.545  | 20.426  | 25.5397 | 26.5789 | 0.34941 | 3.96E-07  | 3.88E-06  | Up-regulated |
| NM_002196    | rotein coding | 283120 | 37.7415 | 35.8036 | 47.2125 | 46.2886 | 0.34911 | 4.29E-07  | 4.19E-06  | Up-regulated |
| NM_004204    | PIGQ          | 9091   | 16.107  | 19.5275 | 22.7679 | 22.7372 | 0.3487  | 0.0031366 | 0.0136517 | Up-regulated |
| NM_144607    | CYB5D1        | 124637 | 4.98816 | 5.08483 | 6.46762 | 6.42115 | 0.34817 | 0.0129753 | 0.046116  | Up-regulated |
| NM_005354    | JUND          | 3727   | 106.516 | 102.87  | 132.795 | 132.877 | 0.34791 | 6.99E-14  | 1.35E-12  | Up-regulated |
| NM_001408    | CELSR2        | 1952   | 6.02583 | 6.67041 | 8.13647 | 8.01587 | 0.34781 | 3.58E-05  | 0.0002524 | Up-regulated |
| NM_020235    | BBX           | 56987  | 6.31153 | 5.18246 | 7.36236 | 7.30168 | 0.34754 | 0.0029967 | 0.0131505 | Up-regulated |
| NM_005542    | INSIG1        | 3638   | 40.5651 | 38.6039 | 49.7446 | 50.7459 | 0.34736 | 4.97E-09  | 6.12E-08  | Up-regulated |
| NM_001348    | DAPK3         | 1613   | 36.6273 | 36.2161 | 48.0303 | 44.4993 | 0.34726 | 3.51E-06  | 3.00E-05  | Up-regulated |
| NM_002593    | PCOLCE        | 5118   | 28.4253 | 30.9643 | 39.1793 | 36.4527 | 0.34723 | 0.0008    | 0.0041947 | Up-regulated |
| NM_003789    | TRADD         | 8717   | 20.5024 | 21.2686 | 27.936  | 25.416  | 0.34717 | 0.0053875 | 0.0219018 | Up-regulated |
| NM_013390    | TMEM2         | 23670  | 21.9517 | 25.6143 | 29.1052 | 31.4086 | 0.34709 | 0.0001058 | 0.0006778 | Up-regulated |
| NM_004381    | ATF6B         | 1388   | 30.8886 | 34.3667 | 42.3062 | 40.6052 | 0.3468  | 2.97E-05  | 0.0002127 | Up-regulated |
| NM_025147    | COQ10B        | 80219  | 16.4365 | 15.7941 | 20.6022 | 20.4073 | 0.34615 | 0.0008178 | 0.0042801 | Up-regulated |
| NM_138774    | R3HDM4        | 91300  | 44.1483 | 40.3122 | 55.418  | 51.8712 | 0.34599 | 6.29E-05  | 0.000422  | Up-regulated |
| NM_024050    | DDA1          | 79016  | 44.3593 | 42.7353 | 56.1941 | 54.1426 | 0.34512 | 1.78E-11  | 2.79E-10  | Up-regulated |
| NM_005688    | ABCC5         | 10057  | 22.6705 | 24.3394 | 29.7212 | 29.87   | 0.34497 | 9.67E-09  | 1.15E-07  | Up-regulated |
| NM_015335    | MED13L        | 23389  | 3.96932 | 4.49097 | 5.30978 | 5.4519  | 0.34492 | 0.0013822 | 0.0067959 | Up-regulated |
| NM_018688    | BIN3          | 55909  | 38.1458 | 38.341  | 50.2288 | 46.811  | 0.34483 | 1.63E-05  | 0.0001232 | Up-regulated |
| NM_0024735   | FBXO31        | 79791  | 10.9139 | 11.5031 | 14.4582 | 13.9717 | 0.34478 | 6.08E-06  | 5.01E-05  | Up-regulated |
| NM_033083    | EAF1          | 85403  | 8.20395 | 8.82212 | 10.7252 | 10.8978 | 0.34421 | 0.0006602 | 0.0035307 | Up-regulated |
| NM_003250    | PML           | 5371   | 14.6728 | 13.969  | 18.7989 | 17.5889 | 0.34398 | 0.0005843 | 0.0031644 | Up-regulated |
| NM_006986    | MAGED1        | 9500   | 113.5   | 120.304 | 148.115 | 147.73  | 0.34396 | 6.04E-14  | 1.18E-12  | Up-regulated |
| NM_015219    | EXOC7         | 23265  | 22.9413 | 22.9465 | 29.0769 | 29.0297 | 0.34394 | 9.62E-10  | 1.28E-08  | Up-regulated |
| NM_016118    | NUB1          | 51667  | 11.5224 | 10.8653 | 13.6525 | 14.794  | 0.34357 | 0.0019262 | 0.0090008 | Up-regulated |
| NM_001100590 | KIAA0232      | 9778   | 3.59299 | 3.47223 | 4.5603  | 4.42754 | 0.34337 | 0.0025481 | 0.0114664 | Up-regulated |
| NM_005474    | HDAC5         | 10014  | 14.3952 | 15.5429 | 17.8313 | 20.165  | 0.34334 | 0.0002141 | 0.0012814 | Up-regulated |
| NM_022356    | P3H1          | 64175  | 50.739  | 53.9442 | 66.0222 | 66.4551 | 0.34321 | 4.42E-09  | 5.48E-08  | Up-regulated |
| NM_015104    | ATG2A         | 23130  | 11.967  | 13.0346 | 16.5732 | 15.1407 | 0.34306 | 7.40E-05  | 0.0004895 | Up-regulated |
| NM_014567    | BCAR1         | 9564   | 13.4254 | 13.3873 | 17.7976 | 16.231  | 0.34292 | 0.0006257 | 0.0033669 | Up-regulated |
| NM_014855    | AP5Z1         | 9907   | 12.7614 | 11.8588 | 15.7158 | 15.4666 | 0.34236 | 9.27E-06  | 7.35E-05  | Up-regulated |
| NM_005749    | TOB1          | 10140  | 14.4629 | 15.9798 | 19.1429 | 19.5712 | 0.34229 | 0.0028754 | 0.0127073 | Up-regulated |
| NM_005883    | APC2          | 10297  | 3.52434 | 4.18428 | 5.30191 | 4.52489 | 0.34227 | 0.0134818 | 0.04765   | Up-regulated |

|              |               |        |         |         |         |         |         |           |           |              |
|--------------|---------------|--------|---------|---------|---------|---------|---------|-----------|-----------|--------------|
| NM_001124    | ADM           | 133    | 33.3197 | 36.7544 | 43.2199 | 45.6185 | 0.34222 | 0.0004848 | 0.0026793 | Up-regulated |
| NM_001014839 | NCDN          | 23154  | 23.903  | 24.7472 | 30.8864 | 30.6446 | 0.34187 | 2.63E-07  | 2.64E-06  | Up-regulated |
| NM_018180    | titative)(DHX | 55760  | 7.87506 | 7.44579 | 9.80232 | 9.72227 | 0.34174 | 0.0076349 | 0.0295065 | Up-regulated |
| NM_002709    | PPP1CB        | 5500   | 26.2984 | 21.9782 | 30.71   | 30.4396 | 0.34065 | 0.0003058 | 0.0017695 | Up-regulated |
| NM_001145056 | SLC44A2       | 57153  | 32.2776 | 31.8278 | 41.8019 | 39.2095 | 0.3404  | 1.51E-07  | 1.57E-06  | Up-regulated |
| NM_001199417 | ARHGAP23      | 57636  | 9.80941 | 10.9357 | 13.947  | 12.3575 | 0.34021 | 0.0011555 | 0.0057964 | Up-regulated |
| NM_001256405 | KDM2A         | 22992  | 6.56046 | 6.81942 | 8.42955 | 8.52809 | 0.33999 | 0.0006503 | 0.0034834 | Up-regulated |
| NM_0011659   | ARF3          | 377    | 113.382 | 112.675 | 143.553 | 141.584 | 0.33992 | 5.21E-24  | 1.91E-22  | Up-regulated |
| NM_001302632 | CAPNS1        | 826    | 153.849 | 162.051 | 205.291 | 193.277 | 0.33964 | 2.57E-09  | 3.26E-08  | Up-regulated |
| NM_182557    | BCL9L         | 283149 | 20.6372 | 23.4787 | 29.4205 | 26.3606 | 0.33896 | 0.0001175 | 0.0007459 | Up-regulated |
| NM_000597    | IGFBP2        | 3485   | 44.2526 | 51.8468 | 61.6681 | 59.9729 | 0.33888 | 0.0012108 | 0.0060389 | Up-regulated |
| NM_014798    | PLEKHM1       | 9842   | 6.42199 | 6.38257 | 8.85061 | 7.41893 | 0.33883 | 0.0089904 | 0.0338283 | Up-regulated |
| NM_004318    | ASPH          | 444    | 12.8188 | 12.6314 | 15.6951 | 16.4428 | 0.33882 | 4.18E-06  | 3.53E-05  | Up-regulated |
| NM_003663    | CGGBP1        | 8545   | 53.0517 | 51.3779 | 64.2849 | 67.3946 | 0.33853 | 2.50E-12  | 4.20E-11  | Up-regulated |
| NM_014983    | HMGXB3        | 22993  | 24.6083 | 25.0954 | 31.3162 | 31.3598 | 0.33853 | 5.71E-11  | 8.60E-10  | Up-regulated |
| NM_001257181 | SLC20A2       | 6575   | 10.2172 | 8.95708 | 12.2137 | 12.0854 | 0.33809 | 0.0037125 | 0.0158762 | Up-regulated |
| NM_032287    | LDQC1L        | 84247  | 8.15352 | 7.8899  | 10.5097 | 9.77659 | 0.33802 | 0.0004761 | 0.0026368 | Up-regulated |
| NM_019004    | ANKIB1        | 54467  | 10.1867 | 10.9482 | 13.4959 | 13.1882 | 0.33741 | 2.42E-05  | 0.0001768 | Up-regulated |
| NM_005686    | SOX13         | 9580   | 35.7628 | 36.4946 | 46.2978 | 44.7532 | 0.33727 | 1.68E-10  | 2.44E-09  | Up-regulated |
| NM_001198916 | PPFIBP1       | 8496   | 66.7932 | 70.6424 | 88.2753 | 84.8475 | 0.33697 | 7.63E-13  | 1.35E-11  | Up-regulated |
| NM_001270520 | DAAM1         | 23002  | 4.52808 | 4.55213 | 5.48816 | 6.01211 | 0.33692 | 0.0058268 | 0.0233402 | Up-regulated |
| NM_006010    | MANF          | 7873   | 242.717 | 232.421 | 300.791 | 296.79  | 0.33633 | 2.05E-11  | 3.19E-10  | Up-regulated |
| NM_181336    | LEMD2         | 221496 | 40.4674 | 41.3022 | 53.9594 | 49.0754 | 0.33606 | 2.61E-06  | 2.27E-05  | Up-regulated |
| NM_004672    | MAP3K6        | 9064   | 11.8048 | 11.3083 | 15.6753 | 13.5508 | 0.33579 | 0.0019506 | 0.0091015 | Up-regulated |
| NM_006949    | STXBP2        | 6813   | 62.4939 | 55.2232 | 74.7791 | 73.6069 | 0.33569 | 2.94E-05  | 0.0002108 | Up-regulated |
| NM_001493    | GDII          | 2664   | 56.4605 | 56.0443 | 70.9918 | 70.5701 | 0.3356  | 8.00E-11  | 1.19E-09  | Up-regulated |
| NM_020412    | CHMP1B        | 57132  | 26.1356 | 24.0308 | 30.5923 | 32.6189 | 0.33518 | 4.84E-05  | 0.000332  | Up-regulated |
| NM_020755    | SERINC1       | 57515  | 59.2205 | 61.4356 | 74.6488 | 77.1354 | 0.33499 | 2.01E-11  | 3.14E-10  | Up-regulated |
| NM_024580    | EFLI          | 79631  | 10.6537 | 9.42825 | 12.438  | 12.9453 | 0.33453 | 0.0030507 | 0.0133478 | Up-regulated |
| NM_004888    | ATP6V1G1      | 9550   | 102.637 | 97.1311 | 124.687 | 126.452 | 0.33442 | 2.39E-09  | 3.03E-08  | Up-regulated |
| NM_152988    | SPPL2B        | 56928  | 8.20152 | 8.36912 | 10.4174 | 10.5018 | 0.33435 | 0.0019447 | 0.0090783 | Up-regulated |
| NM_001146688 | KDM3A         | 55818  | 6.82915 | 6.54144 | 8.25313 | 8.6447  | 0.33412 | 0.002478  | 0.0112039 | Up-regulated |
| NM_020928    | ZSWIM6        | 57688  | 5.43331 | 6.14285 | 7.62275 | 7.00796 | 0.33325 | 0.0074543 | 0.0289022 | Up-regulated |
| NM_021975    | RELA          | 5970   | 27.4672 | 26.9505 | 34.6833 | 33.7344 | 0.33293 | 5.05E-06  | 4.20E-05  | Up-regulated |
| NM_000046    | ARSB          | 411    | 6.24713 | 5.58861 | 7.43616 | 7.49437 | 0.33235 | 0.0023504 | 0.0106799 | Up-regulated |
| NM_152264    | SLC39A13      | 91252  | 24.1249 | 22.5917 | 31.6266 | 27.261  | 0.3323  | 0.0023001 | 0.0104789 | Up-regulated |
| NM_183422    | TSC22D1       | 8848   | 4.43808 | 3.99537 | 5.24681 | 5.39806 | 0.33201 | 0.0080899 | 0.0309953 | Up-regulated |
| NM_014923    | FNDC3A        | 22862  | 6.5227  | 5.78402 | 7.87443 | 7.64704 | 0.33149 | 0.0029037 | 0.0128073 | Up-regulated |
| NM_001693    | ATP6V1B2      | 526    | 126.035 | 122.077 | 152.806 | 158.297 | 0.3311  | 3.79E-16  | 8.64E-15  | Up-regulated |
| NM_001655    | ARCNI         | 372    | 46.6884 | 46.4444 | 58.7958 | 58.0026 | 0.33103 | 1.48E-13  | 2.79E-12  | Up-regulated |
| NM_014335    | EID1          | 23741  | 129.613 | 123.367 | 153.841 | 163.384 | 0.33068 | 8.18E-10  | 1.10E-08  | Up-regulated |
| NM_001755    | CBFB          | 865    | 18.4872 | 21.0859 | 24.5201 | 25.2125 | 0.33005 | 0.0006416 | 0.0034415 | Up-regulated |
| NM_006827    | TMED10        | 10972  | 60.5728 | 60.5672 | 73.345  | 78.4778 | 0.3296  | 9.00E-11  | 1.33E-09  | Up-regulated |
| NM_004354    | CCNG2         | 901    | 6.45919 | 5.94736 | 7.49898 | 8.11886 | 0.32939 | 0.0037039 | 0.0158463 | Up-regulated |
| NM_001478    | B4GALNT1      | 2583   | 23.1281 | 24.578  | 29.6614 | 30.1752 | 0.32883 | 1.86E-05  | 0.0001383 | Up-regulated |
| NM_012434    | SLC17A5       | 26503  | 38.2443 | 38.1165 | 48.0061 | 47.6044 | 0.32843 | 7.07E-10  | 9.53E-09  | Up-regulated |
| NM_198475    | FAM171A2      | 284069 | 13.9432 | 14.2298 | 18.2947 | 17.0905 | 0.32754 | 0.0018073 | 0.0085223 | Up-regulated |
| NM_002596    | CDK18         | 5129   | 11.0043 | 9.83394 | 13.8638 | 12.3539 | 0.32716 | 0.0102042 | 0.0376901 | Up-regulated |
| NM_001142277 | APLP2         | 334    | 23.1476 | 29.2712 | 32.6765 | 33.1845 | 0.32642 | 0.0054739 | 0.0221823 | Up-regulated |
| NM_173542    | PLBD2         | 196463 | 38.8597 | 39.5283 | 51.7618 | 46.4163 | 0.32636 | 2.24E-05  | 0.0001643 | Up-regulated |
| NM_017811    | UBE2R2        | 54926  | 14.4709 | 14.2847 | 17.8841 | 18.1094 | 0.32634 | 8.56E-06  | 6.83E-05  | Up-regulated |
| NM_001007    | RPS4X         | 6191   | 1374.77 | 1296.75 | 1666.27 | 1668.82 | 0.32623 | 1.89E-16  | 4.41E-15  | Up-regulated |
| NM_016578    | RSF1          | 51773  | 6.13188 | 6.02649 | 7.45531 | 7.80105 | 0.32559 | 0.0026362 | 0.0118046 | Up-regulated |
| NM_024927    | PLEKHH3       | 79990  | 19.472  | 18.8522 | 22.8969 | 25.1258 | 0.32535 | 0.0002986 | 0.0017307 | Up-regulated |
| NM_001005340 | GPNMB         | 10457  | 47.4121 | 49.7228 | 56.1014 | 65.4858 | 0.32466 | 0.0002951 | 0.0017126 | Up-regulated |
| NM_018090    | NECAP2        | 55707  | 35.1529 | 34.5945 | 43.455  | 43.7202 | 0.3245  | 6.15E-06  | 5.05E-05  | Up-regulated |
| NM_145728    | SYNM          | 23336  | 11.5321 | 11.5054 | 14.4441 | 14.3414 | 0.32437 | 2.36E-07  | 2.38E-06  | Up-regulated |
| NM_007184    | NISCH         | 11188  | 17.4106 | 18.1003 | 21.8126 | 22.545  | 0.32411 | 5.64E-07  | 5.42E-06  | Up-regulated |
| NM_001188    | BAK1          | 578    | 27.5029 | 25.6885 | 34.8226 | 31.7982 | 0.32408 | 0.0006489 | 0.0034767 | Up-regulated |
| NM_002827    | PTPN1         | 5770   | 63.371  | 61.8781 | 80.1581 | 76.1118 | 0.32351 | 6.54E-11  | 9.81E-10  | Up-regulated |
| NM_153186    | KANK1         | 23189  | 37.3032 | 43.6813 | 49.2983 | 51.9612 | 0.32343 | 0.0001214 | 0.0007685 | Up-regulated |
| NM_172341    | PSENE1        | 55851  | 59.9634 | 55.1714 | 71.2198 | 72.6743 | 0.3234  | 0.0002042 | 0.0012275 | Up-regulated |
| NM_014827    | ZC3H11A       | 9877   | 9.76556 | 11.9048 | 14.449  | 12.7761 | 0.32311 | 0.0130557 | 0.0463499 | Up-regulated |
| NM_006644    | member 1()    | 10808  | 28.5337 | 27.6325 | 34.6602 | 35.418  | 0.32304 | 2.72E-10  | 3.86E-09  | Up-regulated |
| NM_017759    | INO80D        | 54891  | 1.5781  | 1.6066  | 1.99817 | 1.99967 | 0.32294 | 0.0094689 | 0.0353503 | Up-regulated |
| NM_015251    | ATMIN         | 23300  | 7.2382  | 7.73245 | 8.63017 | 10.1473 | 0.32209 | 0.0108762 | 0.0397651 | Up-regulated |
| NM_021818    | SAV1          | 60485  | 8.12095 | 8.51403 | 10.0827 | 10.8033 | 0.32171 | 0.0102772 | 0.0379232 | Up-regulated |
| NM_005779    | LHFPL2        | 10184  | 18.2728 | 17.9375 | 22.603  | 22.5402 | 0.32157 | 1.66E-07  | 1.71E-06  | Up-regulated |
| NM_006494    | ERF           | 2077   | 67.7389 | 66.2931 | 84.0178 | 82.91   | 0.32138 | 7.36E-12  | 1.19E-10  | Up-regulated |
| NM_003827    | NAPA          | 8775   | 88.3154 | 80.6275 | 102.835 | 107.679 | 0.32099 | 2.44E-06  | 2.14E-05  | Up-regulated |
| NM_017526    | LEPROT        | 54741  | 16.0036 | 16.1327 | 19.1722 | 20.9171 | 0.32075 | 4.04E-05  | 0.0002814 | Up-regulated |
| NM_004924    | ACTN4         | 81     | 448.294 | 442.048 | 563.273 | 544.73  | 0.32053 | 3.79E-24  | 1.40E-22  | Up-regulated |
| NM_005979    | S100A13       | 6284   | 212.171 | 214.064 | 267.529 | 262.39  | 0.32048 | 2.17E-07  | 2.20E-06  | Up-regulated |
| NM_006454    | MXD4          | 10608  | 24.8546 | 22.947  | 30.5564 | 29.0178 | 0.3199  | 2.06E-05  | 0.0001521 | Up-regulated |
| NM_005909    | MAP1B         | 4131   | 12.1217 | 14.3712 | 15.8467 | 17.2362 | 0.31989 | 0.0007483 | 0.0039616 | Up-regulated |
| NM_015388    | YIPF3         | 25844  | 92.0074 | 88.1979 | 113.781 | 110.486 | 0.31979 | 3.37E-08  | 3.75E-07  | Up-regulated |
| NM_032141    | NSRP1         | 84081  | 19.1    | 18.6985 | 22.1776 | 25.0631 | 0.3197  | 0.0023188 | 0.010549  | Up-regulated |
| NM_002342    | LTBR          | 4055   | 61.4103 | 60.6458 | 77.7291 | 74.2109 | 0.3196  | 1.87E-08  | 2.14E-07  | Up-regulated |
| NM_178568    | RTN4RL1       | 146760 | 10.7748 | 10.5238 | 13.5681 | 13.0233 | 0.31941 | 0.0011718 | 0.0058687 | Up-regulated |
| NM_018337    | ZNF444        | 55311  | 23.9355 | 25.837  | 32.1048 | 29.979  | 0.31926 | 0.0010792 | 0.0054597 | Up-regulated |
| NM_007318    | PSEN1         | 5663   | 6.62608 | 6.38559 | 8.41679 | 7.83583 | 0.31888 | 0.0014781 | 0.0071734 | Up-regulated |
| NR_046235    | RNA45S5       | 1E+08  | 895.26  | 1004.35 | 1142.19 | 1224.53 | 0.31878 | 3.55E-05  | 0.0002502 | Up-regulated |
| NM_024706    | ZNF668        | 79759  | 10.2526 | 10.8422 | 13.5918 | 12.7685 | 0.31871 | 0.007772  | 0.0299395 | Up-regulated |
| NM_004761    | RGL2          | 5863   | 19.4272 | 19.893  | 24.5388 | 24.4145 | 0.31843 | 1.62E-05  | 0.0001223 | Up-regulated |

|              |                 |        |         |         |         |         |         |           |           |              |
|--------------|-----------------|--------|---------|---------|---------|---------|---------|-----------|-----------|--------------|
| NM_001031732 | YTHDC1          | 91746  | 6.11492 | 6.28351 | 7.38494 | 8.08549 | 0.31829 | 0.0021761 | 0.0099957 | Up-regulated |
| NM_001080452 | GPR108          | 56927  | 30.3759 | 26.8424 | 35.1388 | 36.1918 | 0.31741 | 0.0010811 | 0.0054664 | Up-regulated |
| NM_014164    | FXYS5           | 53827  | 191.736 | 174.557 | 224.653 | 230.443 | 0.31726 | 6.27E-06  | 5.14E-05  | Up-regulated |
| NM_003715    | USO1            | 8615   | 31.1018 | 29.7221 | 35.9678 | 39.681  | 0.31689 | 1.50E-05  | 0.000114  | Up-regulated |
| NM_017727    | TMEM214         | 54867  | 37.3015 | 35.3894 | 46.9955 | 43.3363 | 0.31623 | 1.24E-05  | 9.55E-05  | Up-regulated |
| NM_005620    | S100A11         | 6282   | 808.779 | 762.068 | 948.117 | 996.921 | 0.31576 | 1.23E-08  | 1.44E-07  | Up-regulated |
| NM_020680    | SCYL1           | 57410  | 26.3677 | 22.8894 | 31.4621 | 29.8606 | 0.31573 | 0.0015456 | 0.0074517 | Up-regulated |
| NM_004343    | CALR            | 811    | 1196.25 | 1190.99 | 1482.64 | 1476.56 | 0.31557 | 3.32E-40  | 2.21E-38  | Up-regulated |
| NM_018275    | C7orf43         | 55262  | 12.3055 | 13.1861 | 15.8292 | 15.9444 | 0.31552 | 0.004811  | 0.0198071 | Up-regulated |
| NM_016323    | HERC5           | 51191  | 13.8449 | 14.0712 | 16.8318 | 17.869  | 0.3154  | 0.0004284 | 0.0024004 | Up-regulated |
| NM_001567    | INPPL1          | 3636   | 32.7471 | 34.1742 | 42.7022 | 40.3622 | 0.3152  | 7.60E-08  | 8.13E-07  | Up-regulated |
| NM_005724    | TSPAN3          | 10099  | 100.286 | 97.7499 | 124.564 | 121.005 | 0.31513 | 2.06E-16  | 4.80E-15  | Up-regulated |
| NM_001321324 | MOV10           | 4343   | 13.1531 | 13.907  | 16.6592 | 16.9778 | 0.3147  | 0.0006535 | 0.0034973 | Up-regulated |
| NM_000629    | IFNAR1          | 3454   | 11.7355 | 12.1555 | 14.7439 | 14.8927 | 0.31414 | 7.14E-06  | 5.79E-05  | Up-regulated |
| NM_001035254 | FAM102A         | 399665 | 8.23775 | 8.56665 | 10.5537 | 10.3682 | 0.31411 | 0.0022416 | 0.0102539 | Up-regulated |
| NM_003763    | STX16           | 8675   | 19.4581 | 19.5586 | 25.49   | 22.9505 | 0.31371 | 5.42E-05  | 0.0003691 | Up-regulated |
| NM_003893    | LDB1            | 8861   | 16.8876 | 18.0541 | 23.1303 | 20.377  | 0.31324 | 0.0075772 | 0.029337  | Up-regulated |
| NM_001135651 | EIF2AK2         | 5610   | 16.9403 | 19.5869 | 22.4349 | 22.9597 | 0.31319 | 0.0009557 | 0.0049102 | Up-regulated |
| NM_002835    | PTPN12          | 5782   | 24.9786 | 24.337  | 30.1749 | 30.9476 | 0.31245 | 4.71E-06  | 3.95E-05  | Up-regulated |
| NM_006289    | TLN1            | 7094   | 36.0532 | 37.1958 | 46.7936 | 43.8853 | 0.31189 | 5.15E-10  | 7.05E-09  | Up-regulated |
| NM_175744    | RHOC            | 389    | 48.6218 | 48.9021 | 60.7476 | 60.0775 | 0.31186 | 5.47E-05  | 0.0003724 | Up-regulated |
| NM_001319078 | HMGAI           | 3159   | 23.3218 | 22.4623 | 26.3427 | 30.5505 | 0.31071 | 0.0085998 | 0.0326025 | Up-regulated |
| NM_033158    | HYAL2           | 8692   | 42.3662 | 42.7784 | 55.5809 | 49.8673 | 0.31063 | 7.59E-05  | 0.0005009 | Up-regulated |
| NM_003299    | HSP90B1         | 7184   | 361.809 | 372.76  | 453.798 | 453.913 | 0.3105  | 6.47E-24  | 2.35E-22  | Up-regulated |
| NM_174916    | UBR1            | 197131 | 3.01096 | 3.09692 | 3.7339  | 3.85369 | 0.31002 | 0.0123054 | 0.044162  | Up-regulated |
| NM_001322374 | CEBPZOS         | 1E+08  | 9.40198 | 9.23124 | 11.3887 | 11.7385 | 0.30975 | 0.0059496 | 0.0237674 | Up-regulated |
| NM_004886    | APBA3           | 9546   | 15.822  | 15.622  | 20.3986 | 18.6342 | 0.30947 | 0.0069679 | 0.0272373 | Up-regulated |
| NM_000018    | ACADVL          | 37     | 220.378 | 218.741 | 268.988 | 273.189 | 0.30947 | 4.94E-22  | 1.61E-20  | Up-regulated |
| NM_018992    | KCTD5           | 54442  | 35.597  | 34.9237 | 43.8047 | 43.3475 | 0.30891 | 2.26E-06  | 1.98E-05  | Up-regulated |
| NM_004756    | NUMBL           | 9253   | 15.8577 | 16.4106 | 20.4652 | 19.4462 | 0.30863 | 0.0002069 | 0.001243  | Up-regulated |
| NM_198576    | AGRN            | 375790 | 165.303 | 179.146 | 222.7   | 202.8   | 0.30802 | 8.03E-07  | 7.57E-06  | Up-regulated |
| NM_002822    | TWF1            | 5756   | 37.8349 | 38.3987 | 45.1642 | 48.9914 | 0.30784 | 5.85E-06  | 4.83E-05  | Up-regulated |
| NM_001429    | EP300           | 2033   | 12.5129 | 13.2467 | 15.779  | 16.0363 | 0.3078  | 5.17E-07  | 5.00E-06  | Up-regulated |
| NM_001159773 | CANT1           | 124583 | 23.5034 | 24.3954 | 30.8404 | 28.3638 | 0.3077  | 0.000101  | 0.0006499 | Up-regulated |
| NM_000240    | MAOA            | 4128   | 5.40467 | 5.15051 | 6.41247 | 6.67561 | 0.30768 | 0.007959  | 0.0305489 | Up-regulated |
| NM_005642    | TAF7            | 6879   | 64.6812 | 61.1663 | 75.3932 | 79.9762 | 0.30739 | 1.25E-06  | 1.15E-05  | Up-regulated |
| NM_014795    | ZEB2            | 9839   | 7.6349  | 6.94808 | 9.59566 | 8.45662 | 0.30708 | 0.0021247 | 0.0097942 | Up-regulated |
| NM_006634    | VAMP5           | 10791  | 292.884 | 274.115 | 360.523 | 338.063 | 0.30685 | 9.72E-06  | 7.68E-05  | Up-regulated |
| NM_000918    | P4HB            | 5034   | 394.319 | 388.615 | 487.397 | 477.432 | 0.30668 | 8.06E-26  | 3.30E-24  | Up-regulated |
| NR_137295    | NR_137295       | NA     | 1666.08 | 1671.36 | 1993.41 | 2118.46 | 0.30635 | 4.72E-14  | 9.35E-13  | Up-regulated |
| NM_177925    | H2AFJ           | 55766  | 8.97105 | 8.40662 | 10.3373 | 11.2015 | 0.3063  | 0.008411  | 0.03202   | Up-regulated |
| NM_014970    | KIFAP3          | 22920  | 14.5746 | 17.4237 | 19.3819 | 20.2609 | 0.30593 | 0.0103613 | 0.0381598 | Up-regulated |
| NM_006389    | HYOU1           | 10525  | 44.7157 | 49.9556 | 58.3747 | 58.3592 | 0.30509 | 3.77E-06  | 3.20E-05  | Up-regulated |
| NM_022900    | CASD1           | 64921  | 6.83682 | 6.69467 | 8.44293 | 8.30689 | 0.30493 | 0.0102688 | 0.0379052 | Up-regulated |
| NM_001129994 | KCTD15          | 79047  | 18.9174 | 18.5949 | 24.2776 | 21.969  | 0.30405 | 0.0002624 | 0.0015387 | Up-regulated |
| NM_019554    | S100A4          | 6275   | 327.152 | 315.054 | 388.753 | 399.598 | 0.30324 | 3.25E-06  | 2.79E-05  | Up-regulated |
| NM_001009552 | PPP2CB          | 5516   | 42.8858 | 39.5826 | 51.1046 | 50.4627 | 0.30301 | 8.06E-05  | 0.0005286 | Up-regulated |
| NM_080593    | HIST1H2BK       | 85236  | 170.173 | 158.611 | 197.419 | 206.966 | 0.30286 | 2.38E-05  | 0.0001739 | Up-regulated |
| NM_004604    | STX4            | 6810   | 46.4754 | 45.0853 | 56.5256 | 56.185  | 0.30235 | 0.0001061 | 0.0006795 | Up-regulated |
| NM_181672    | cc) transferase | 8473   | 83.4691 | 92.1853 | 105.67  | 110.426 | 0.30233 | 3.53E-07  | 3.48E-06  | Up-regulated |
| NM_001083617 | RB1CC1          | 9821   | 6.00696 | 6.48704 | 7.50946 | 7.9032  | 0.30222 | 0.0024965 | 0.0112794 | Up-regulated |
| NM_031229    | RBCK1           | 10616  | 13.5241 | 12.3286 | 15.247  | 16.6456 | 0.3022  | 0.0027345 | 0.0121707 | Up-regulated |
| NM_016605    | FAM53C          | 51307  | 17.2192 | 16.4264 | 20.6944 | 20.7015 | 0.3019  | 2.14E-05  | 0.0001574 | Up-regulated |
| NM_031288    | INO80B          | 83444  | 68.314  | 66.256  | 84.2632 | 81.266  | 0.30183 | 3.71E-05  | 0.0002607 | Up-regulated |
| NM_007047    | BTN3A2          | 11118  | 10.5604 | 10.3827 | 12.4088 | 13.4134 | 0.30178 | 0.0028491 | 0.0126072 | Up-regulated |
| NM_001286365 | MAP7D1          | 55700  | 49.3624 | 46.3749 | 61.4602 | 56.2978 | 0.30147 | 1.13E-05  | 8.83E-05  | Up-regulated |
| NM_001146213 | TBC1D15         | 64786  | 8.30101 | 7.29679 | 10.0446 | 9.20095 | 0.30119 | 0.0070541 | 0.0275405 | Up-regulated |
| NM_005895    | GOLGA3          | 2802   | 20.2013 | 21.3656 | 26.1958 | 24.8935 | 0.30113 | 1.07E-07  | 1.13E-06  | Up-regulated |
| NM_004176    | SREBF1          | 6720   | 35.7937 | 38.026  | 48.0591 | 42.748  | 0.30102 | 6.93E-05  | 0.0004609 | Up-regulated |
| NM_002896    | RBM4            | 5936   | 40.471  | 42.5422 | 50.211  | 51.896  | 0.3009  | 0.0001433 | 0.0008946 | Up-regulated |
| NM_006241    | PPP1R2          | 5504   | 15.3004 | 14.6797 | 17.663  | 19.2514 | 0.30088 | 0.0012496 | 0.0062162 | Up-regulated |
| NM_001145426 | YBX3            | 8531   | 20.9484 | 21.179  | 26.9439 | 25.0189 | 0.30072 | 0.0059156 | 0.0236514 | Up-regulated |
| NM_004047    | ATP6V0B         | 533    | 171.126 | 157.972 | 203.968 | 200.084 | 0.30068 | 3.19E-07  | 3.16E-06  | Up-regulated |
| NM_015306    | USP24           | 23358  | 9.13614 | 9.5933  | 11.6051 | 11.4125 | 0.30045 | 1.49E-06  | 1.34E-05  | Up-regulated |
| NM_018950    | HLA-F           | 3134   | 71.155  | 66.9406 | 83.4913 | 86.1209 | 0.30042 | 6.14E-05  | 0.0004121 | Up-regulated |
| NM_016255    | FAM8A1          | 51439  | 10.9904 | 11.4002 | 13.5402 | 13.9988 | 0.30023 | 0.0003376 | 0.0019357 | Up-regulated |
| NM_006029    | PNMA1           | 9240   | 25.5626 | 23.7312 | 28.803  | 31.8694 | 0.30008 | 0.0014053 | 0.006892  | Up-regulated |
| NM_212471    | PRKAR1A         | 5573   | 65.5658 | 68.7461 | 80.2343 | 84.6196 | 0.29967 | 2.39E-09  | 3.03E-08  | Up-regulated |
| NM_030938    | VMP1            | 81671  | 34.1335 | 35.6662 | 43.5368 | 42.1351 | 0.29919 | 2.17E-07  | 2.20E-06  | Up-regulated |
| NM_006148    | LASP1           | 3927   | 84.174  | 85.1059 | 104.19  | 103.398 | 0.29911 | 2.28E-17  | 5.62E-16  | Up-regulated |
| NM_021103    | TMSB10          | 9168   | 6790.88 | 6346.78 | 7981.49 | 8064.5  | 0.29886 | 5.60E-11  | 8.44E-10  | Up-regulated |
| NM_004281    | BAG3            | 9531   | 37.6534 | 37.6994 | 45.6783 | 46.7803 | 0.29885 | 1.61E-06  | 1.45E-05  | Up-regulated |
| NM_006369    | LRRC41          | 10489  | 17.8262 | 17.9092 | 21.4339 | 22.4836 | 0.2986  | 0.0004887 | 0.0026963 | Up-regulated |
| NM_001001521 | UGP2            | 7360   | 32.3435 | 29.373  | 37.1676 | 38.6232 | 0.29832 | 0.0007639 | 0.0040355 | Up-regulated |
| NM_001304525 | MAD1L1          | 8379   | 78.4059 | 79.7976 | 100.06  | 94.0221 | 0.29802 | 2.12E-05  | 0.0001561 | Up-regulated |
| NM_001195479 | TFG             | 10342  | 21.2038 | 21.9432 | 28.154  | 24.9512 | 0.29785 | 0.006642  | 0.02614   | Up-regulated |
| NM_003164    | STX5            | 6811   | 21.1616 | 20.4824 | 25.6808 | 25.4816 | 0.2968  | 0.0038701 | 0.0164617 | Up-regulated |
| NM_020440    | PTGFRN          | 5738   | 12.8655 | 13.6118 | 17.4095 | 15.1025 | 0.29639 | 0.0017915 | 0.0084559 | Up-regulated |
| NM_020673    | RAB22A          | 57403  | 6.913   | 6.81141 | 8.19274 | 8.63464 | 0.29633 | 0.0001761 | 0.0010731 | Up-regulated |
| NM_003334    | UBA1            | 7317   | 92.3529 | 90.0911 | 113.779 | 109.463 | 0.29583 | 1.73E-12  | 2.97E-11  | Up-regulated |
| NM_015358    | MORC3           | 23515  | 8.10268 | 8.64277 | 9.8256  | 10.7424 | 0.29568 | 0.0084866 | 0.0322631 | Up-regulated |
| NM_015395    | TECPR1          | 25851  | 12.893  | 14.2528 | 16.3932 | 16.8921 | 0.29561 | 0.0002875 | 0.0016718 | Up-regulated |
| NM_001317007 | S100A16         | 140576 | 34.9025 | 34.0794 | 41.4787 | 43.0987 | 0.29503 | 0.001517  | 0.0073381 | Up-regulated |
| NM_007024    | TMEM115         | 11070  | 31.8169 | 31.9765 | 39.2587 | 38.8854 | 0.29489 | 8.48E-05  | 0.000553  | Up-regulated |

|              |                |        |         |         |         |         |         |           |           |              |
|--------------|----------------|--------|---------|---------|---------|---------|---------|-----------|-----------|--------------|
| NM_004448    | ERBB2          | 2064   | 17.0818 | 17.866  | 21.2551 | 21.5259 | 0.2946  | 1.66E-05  | 0.0001249 | Up-regulated |
| NM_001042498 | SLC35A2        | 7355   | 13.5445 | 14.9447 | 17.5931 | 17.3738 | 0.29445 | 0.0072556 | 0.0282405 | Up-regulated |
| NM_001017956 | OS9            | 10956  | 55.0773 | 51.8765 | 62.4757 | 68.441  | 0.29425 | 3.77E-05  | 0.0002638 | Up-regulated |
| NM_006503    | PSMC4          | 5704   | 142.427 | 132.989 | 166.026 | 170.569 | 0.29396 | 2.15E-08  | 2.46E-07  | Up-regulated |
| NM_003927    | MBD2           | 8932   | 9.53139 | 9.69006 | 11.4221 | 12.1204 | 0.29341 | 0.0008433 | 0.0044001 | Up-regulated |
| NM_001166    | BIRC2          | 329    | 9.72774 | 9.77212 | 11.9758 | 11.908  | 0.29289 | 0.0029928 | 0.0131365 | Up-regulated |
| NM_001206799 | PKM            | 5315   | 74.7227 | 73.3178 | 91.4912 | 89.2759 | 0.2926  | 1.81E-09  | 2.31E-08  | Up-regulated |
| NM_014858    | TMCC2          | 9911   | 42.8836 | 42.8092 | 54.1721 | 50.4794 | 0.29214 | 3.86E-07  | 3.78E-06  | Up-regulated |
| NM_006812    | OS9            | 10956  | 44.577  | 46.5881 | 59.8596 | 51.6679 | 0.29194 | 0.0008933 | 0.0046382 | Up-regulated |
| NM_006037    | HDAC4          | 9759   | 6.92392 | 7.56837 | 8.81989 | 8.89721 | 0.29129 | 0.0004124 | 0.002319  | Up-regulated |
| NM_033109    | PNPT1          | 87178  | 14.1156 | 14.2861 | 16.8665 | 17.8202 | 0.29113 | 0.0001584 | 0.0009771 | Up-regulated |
| NM_001011713 | e 30, NatC ca  | 122830 | 7.78498 | 8.4106  | 10.1677 | 9.65441 | 0.2903  | 0.0072593 | 0.0282492 | Up-regulated |
| NM_002086    | GRB2           | 2885   | 55.3658 | 52.4905 | 66.1492 | 65.3512 | 0.29026 | 2.33E-08  | 2.65E-07  | Up-regulated |
| NM_025015    | member 12A(F   | 259217 | 6.02082 | 6.08716 | 7.16729 | 7.65195 | 0.28977 | 0.005873  | 0.0235054 | Up-regulated |
| NM_006747    | SIPA1          | 6494   | 17.3369 | 17.3149 | 21.8987 | 20.404  | 0.28969 | 0.0005012 | 0.0027575 | Up-regulated |
| NM_006868    | RAB31          | 11031  | 26.1101 | 25.3846 | 30.4262 | 32.3668 | 0.28959 | 1.19E-05  | 9.20E-05  | Up-regulated |
| NM_015711    | GLTSCR1        | 29998  | 4.83468 | 5.04772 | 6.06846 | 6.0313  | 0.28921 | 0.0111124 | 0.0405046 | Up-regulated |
| NM_139012    | MAPK14         | 1432   | 10.5536 | 9.74153 | 12.0638 | 12.7271 | 0.28913 | 0.0034352 | 0.0148299 | Up-regulated |
| NM_001127213 | LY6E           | 4061   | 364.707 | 371.964 | 456.874 | 439.495 | 0.28889 | 9.40E-13  | 1.64E-11  | Up-regulated |
| NM_020831    | location) 1(M  | 57591  | 9.07038 | 9.66364 | 11.6235 | 11.2629 | 0.28868 | 0.0028174 | 0.012496  | Up-regulated |
| NM_002791    | PSMA6          | 5687   | 238.712 | 225.28  | 275.341 | 289.359 | 0.28852 | 3.71E-07  | 3.65E-06  | Up-regulated |
| NM_016626    | MEX3C          | 51320  | 18.2545 | 18.2234 | 21.391  | 23.0849 | 0.28848 | 0.0001611 | 0.0009921 | Up-regulated |
| NM_020350    | AGTRAP         | 57085  | 75.2622 | 75.9772 | 92.0855 | 92.0622 | 0.28818 | 3.13E-05  | 0.0002229 | Up-regulated |
| NM_001142601 | SPHK1          | 8877   | 34.4182 | 36.574  | 45.5469 | 40.9948 | 0.28674 | 0.0027362 | 0.0121752 | Up-regulated |
| NM_030799    | YIPF5          | 81555  | 19.1771 | 19.8052 | 23.5106 | 23.9733 | 0.28674 | 0.0002155 | 0.0012882 | Up-regulated |
| NM_005827    | SLC35B1        | 10237  | 30.0284 | 26.6409 | 35.1865 | 33.9852 | 0.28663 | 0.0085803 | 0.0325349 | Up-regulated |
| NM_002663    | PLD2           | 5338   | 13.1896 | 12.6437 | 16.6124 | 14.9196 | 0.28661 | 0.0057927 | 0.0232258 | Up-regulated |
| NM_014911    | AAK1           | 22848  | 1.9176  | 2.12352 | 2.47088 | 2.45777 | 0.2866  | 0.0040437 | 0.0170768 | Up-regulated |
| NM_033630    | SCAND1         | 51282  | 84.8477 | 76.9094 | 97.0953 | 99.9627 | 0.28644 | 0.002117  | 0.0097702 | Up-regulated |
| NM_002103    | GYS1           | 2997   | 26.4258 | 25.9798 | 32.9519 | 30.84   | 0.28621 | 3.29E-05  | 0.0002341 | Up-regulated |
| NM_013260    | SAP30BP        | 29115  | 21.3915 | 20.2799 | 24.5703 | 26.2009 | 0.28563 | 0.0012524 | 0.0062268 | Up-regulated |
| NM_001127178 | PIGG           | 54872  | 9.83689 | 10.3227 | 12.3436 | 12.2374 | 0.28532 | 0.0051425 | 0.0210222 | Up-regulated |
| NM_005113    | GOLGA5         | 9950   | 13.6669 | 12.6459 | 16.6433 | 15.4372 | 0.28492 | 0.0089748 | 0.0337761 | Up-regulated |
| NM_024490    | tative)(ATP1I  | 57194  | 9.47917 | 10.5841 | 12.6783 | 11.7672 | 0.28442 | 0.0050824 | 0.0207944 | Up-regulated |
| NM_001846    | COL4A2         | 1284   | 116.595 | 122.663 | 149.658 | 140.871 | 0.28436 | 3.12E-09  | 3.91E-08  | Up-regulated |
| NM_001042679 | RHOC           | 389    | 135.923 | 120.893 | 162.193 | 149.863 | 0.28411 | 0.0004704 | 0.0026104 | Up-regulated |
| NM_021160    | ABHD16A        | 7920   | 19.4505 | 18.1383 | 23.428  | 22.3481 | 0.28377 | 0.0086739 | 0.0328119 | Up-regulated |
| NM_001724    | BPGM           | 669    | 26.4002 | 23.4371 | 30.7857 | 29.8897 | 0.28308 | 0.0091446 | 0.0343207 | Up-regulated |
| NM_024736    | GSDMD          | 79792  | 40.6817 | 41.6014 | 51.7992 | 48.093  | 0.28264 | 0.0005334 | 0.0029125 | Up-regulated |
| NM_013255    | MKLN1          | 4289   | 4.632   | 5.13716 | 5.84395 | 6.02396 | 0.28202 | 0.0022586 | 0.0103192 | Up-regulated |
| NM_001007237 | IGSF3          | 3321   | 11.4113 | 10.8759 | 13.0763 | 13.9744 | 0.28168 | 0.0001479 | 0.0009205 | Up-regulated |
| NM_017607    | PPP1R12C       | 54776  | 26.398  | 28.7466 | 32.2545 | 34.6934 | 0.28162 | 0.0007823 | 0.0041248 | Up-regulated |
| NM_001127358 | PHTF2          | 57157  | 6.74821 | 7.25768 | 8.4493  | 8.5816  | 0.2816  | 0.0075954 | 0.0293953 | Up-regulated |
| NM_014613    | FAF2           | 23197  | 18.1209 | 19.4703 | 23.001  | 22.6116 | 0.28136 | 0.0001004 | 0.0006466 | Up-regulated |
| NM_130847    | AMOTL1         | 154810 | 13.2052 | 11.9458 | 15.0867 | 15.42   | 0.28125 | 7.87E-05  | 0.0005179 | Up-regulated |
| NM_013271    | PCSK1N         | 27344  | 100.69  | 95.0381 | 120.78  | 116.283 | 0.28043 | 0.0001088 | 0.0006954 | Up-regulated |
| NM_016480    | in interacting | 51247  | 68.5612 | 63.0789 | 76.9819 | 82.5908 | 0.28039 | 0.0005495 | 0.0029921 | Up-regulated |
| NM_014371    | AKAP8L         | 26993  | 41.4023 | 39.0121 | 49.2831 | 48.1788 | 0.28033 | 7.09E-05  | 0.0004708 | Up-regulated |
| NM_004716    | PCSK7          | 9159   | 7.82818 | 8.1757  | 9.80254 | 9.641   | 0.28013 | 0.0108473 | 0.0396745 | Up-regulated |
| NM_001145409 | NONO           | 4841   | 34.5909 | 33.232  | 41.8396 | 40.2828 | 0.27976 | 1.23E-05  | 9.48E-05  | Up-regulated |
| NM_002790    | PSMA5          | 5686   | 46.5768 | 42.0502 | 54.3902 | 52.9679 | 0.27974 | 2.71E-05  | 0.000196  | Up-regulated |
| NM_003461    | ZYX            | 7791   | 108.909 | 101.355 | 128.723 | 125.725 | 0.27956 | 1.92E-07  | 1.96E-06  | Up-regulated |
| NM_006319    | CDIPT          | 10423  | 118.991 | 126.213 | 149.53  | 147.176 | 0.27951 | 4.82E-08  | 5.29E-07  | Up-regulated |
| NM_025185    | TANC2          | 26115  | 4.5686  | 4.61124 | 5.67795 | 5.44627 | 0.27947 | 0.0005893 | 0.0031886 | Up-regulated |
| NM_001010972 | ZYX            | 7791   | 88.8905 | 93.3491 | 110.235 | 110.256 | 0.27943 | 1.55E-08  | 1.80E-07  | Up-regulated |
| NM_002032    | FTH1           | 2495   | 999.857 | 962.117 | 1181.8  | 1188.53 | 0.27881 | 2.65E-17  | 6.52E-16  | Up-regulated |
| NR_028272    | tein coding)(C | 283131 | 90.0404 | 98.5388 | 117.777 | 110.424 | 0.27859 | 7.88E-06  | 6.33E-05  | Up-regulated |
| NM_001098790 | MID1IP1        | 58526  | 51.5699 | 57.1753 | 65.5797 | 66.0778 | 0.27849 | 0.0002352 | 0.0013933 | Up-regulated |
| NM_014726    | TBKBP1         | 9755   | 23.3494 | 23.3497 | 28.7352 | 27.754  | 0.27837 | 8.37E-06  | 6.69E-05  | Up-regulated |
| NM_007269    | STXBP3         | 6814   | 17.2062 | 17.0454 | 19.7665 | 21.7677 | 0.2783  | 0.0073771 | 0.0286376 | Up-regulated |
| NM_153828    | RTN4           | 57142  | 385.515 | 373.95  | 468.061 | 449.64  | 0.27814 | 6.62E-14  | 1.29E-12  | Up-regulated |
| NM_024334    | TMEM43         | 79188  | 36.5769 | 35.2296 | 43.0637 | 43.7696 | 0.27776 | 1.41E-06  | 1.28E-05  | Up-regulated |
| NM_005230    | ELK3           | 2004   | 27.2479 | 26.274  | 31.4014 | 33.3278 | 0.27757 | 1.65E-05  | 0.000124  | Up-regulated |
| NM_033025    | SYDE1          | 85360  | 41.3141 | 40.051  | 50.2493 | 48.0743 | 0.27717 | 1.62E-06  | 1.46E-05  | Up-regulated |
| NM_183352    | SEC13          | 6396   | 136.659 | 131.469 | 158.216 | 165.561 | 0.27666 | 4.52E-07  | 4.39E-06  | Up-regulated |
| NM_001009998 | SSBP4          | 170463 | 28.7181 | 30.2595 | 36.7481 | 34.6257 | 0.27643 | 0.003789  | 0.0161597 | Up-regulated |
| NM_145173    | DIRAS1         | 148252 | 37.1151 | 37.3582 | 46.5799 | 43.3865 | 0.27629 | 1.37E-05  | 0.0001045 | Up-regulated |
| NM_198240    | CLIP1          | 6249   | 11.258  | 10.7043 | 12.6117 | 13.9679 | 0.27627 | 0.0021418 | 0.0098659 | Up-regulated |
| NM_001015053 | HDAC5          | 10014  | 17.8268 | 16.6972 | 22.0696 | 19.6896 | 0.27564 | 0.0013276 | 0.0065562 | Up-regulated |
| NM_015483    | KBTBD2         | 25948  | 13.1209 | 13.2815 | 15.5343 | 16.3921 | 0.27539 | 0.001968  | 0.0091709 | Up-regulated |
| NM_005829    | AP3S2          | 10239  | 7.44279 | 7.10755 | 9.23048 | 8.37121 | 0.27516 | 0.0073749 | 0.028635  | Up-regulated |
| NM_031407    | HUWE1          | 10075  | 28.222  | 28.5466 | 34.8793 | 33.5949 | 0.27513 | 4.59E-13  | 8.30E-12  | Up-regulated |
| NM_002778    | PSAP           | 5660   | 346.337 | 350.236 | 421.826 | 417.921 | 0.27499 | 6.87E-24  | 2.48E-22  | Up-regulated |
| NM_021267    | CERS1          | 10715  | 21.0551 | 21.7465 | 25.0932 | 26.6224 | 0.27481 | 0.0017535 | 0.0083136 | Up-regulated |
| NM_018202    | TMEM57         | 55219  | 10.17   | 9.81974 | 11.7148 | 12.4553 | 0.27468 | 0.0061159 | 0.0243348 | Up-regulated |
| NM_021943    | ZFAND3         | 60685  | 28.11   | 28.9065 | 34.7455 | 34.0173 | 0.27413 | 1.55E-05  | 0.0001177 | Up-regulated |
| NM_001336    | CTSZ           | 1522   | 192.823 | 189.761 | 238.607 | 222.232 | 0.27334 | 2.08E-07  | 2.12E-06  | Up-regulated |
| NM_014246    | CELSR1         | 9620   | 7.35512 | 7.85126 | 9.06366 | 9.28319 | 0.27325 | 9.27E-05  | 0.0006007 | Up-regulated |
| NM_004766    | COPB2          | 9276   | 70.2353 | 68.5649 | 82.9016 | 84.2936 | 0.27301 | 6.44E-10  | 8.70E-09  | Up-regulated |
| NM_001109662 | HECTD4         | 283450 | 3.08858 | 3.58324 | 4.13944 | 3.92605 | 0.27255 | 0.0112664 | 0.0409643 | Up-regulated |
| NM_006224    | PITPNA         | 5306   | 38.6866 | 39.909  | 47.9738 | 46.6855 | 0.2723  | 5.36E-07  | 5.17E-06  | Up-regulated |
| NM_181715    | CRTC2          | 200186 | 20.2913 | 21.4297 | 26.1665 | 24.1444 | 0.27205 | 0.0033843 | 0.0146266 | Up-regulated |
| NM_175875    | SIX5           | 147912 | 26.2151 | 26.3953 | 33.9176 | 29.5608 | 0.27196 | 0.0025173 | 0.0113519 | Up-regulated |
| NM_005885    | 6-Mar          | 10299  | 11.4244 | 12.161  | 13.7457 | 14.6707 | 0.27162 | 8.27E-05  | 0.0005412 | Up-regulated |

|              |               |        |         |         |         |         |         |           |           |              |
|--------------|---------------|--------|---------|---------|---------|---------|---------|-----------|-----------|--------------|
| NM_020452    | ATP8B2        | 57198  | 20.8907 | 21.841  | 25.364  | 26.0705 | 0.27099 | 3.31E-06  | 2.83E-05  | Up-regulated |
| NM_138425    | C12orf57      | 113246 | 99.7921 | 99.3998 | 122.182 | 117.537 | 0.27091 | 0.0013666 | 0.0067262 | Up-regulated |
| NM_198488    | FAM83H        | 286077 | 33.8659 | 35.1754 | 43.5288 | 39.5751 | 0.27087 | 3.47E-05  | 0.0002454 | Up-regulated |
| NM_153634    | CPNE8         | 144402 | 10.4235 | 11.1461 | 13.2541 | 12.7709 | 0.27047 | 0.0101606 | 0.0375509 | Up-regulated |
| NM_006811    | SERINC3       | 10955  | 36.7198 | 36.3928 | 42.2176 | 45.7315 | 0.27036 | 8.36E-06  | 6.68E-05  | Up-regulated |
| NM_053056    | CCND1         | 595    | 80.3879 | 79.1034 | 96.195  | 95.461  | 0.26997 | 3.92E-14  | 7.83E-13  | Up-regulated |
| NM_005858    | AKAP8         | 10270  | 22.8853 | 22.6919 | 28.5269 | 26.316  | 0.26982 | 0.0004219 | 0.0023669 | Up-regulated |
| NM_014631    | SH3PXD2A      | 9644   | 14.5612 | 14.6915 | 18.0472 | 17.1128 | 0.26956 | 4.34E-07  | 4.23E-06  | Up-regulated |
| NM_002460    | IRF4          | 3662   | 9.36272 | 10.6843 | 11.5837 | 12.5719 | 0.26853 | 0.0120829 | 0.0434862 | Up-regulated |
| NM_001146156 | GSK3B         | 2932   | 12.1884 | 12.1414 | 14.2246 | 14.9905 | 0.26701 | 7.17E-05  | 0.0004753 | Up-regulated |
| NM_005346    | member 1B(F   | 3304   | 21.4583 | 20.1206 | 25.5961 | 24.3258 | 0.266   | 0.0037622 | 0.01606   | Up-regulated |
| NM_015308    | FBNP4         | 23360  | 10.3137 | 9.58901 | 11.6105 | 12.3027 | 0.26587 | 0.008923  | 0.0335945 | Up-regulated |
| NM_001748    | CAPN2         | 824    | 80.5108 | 82.8397 | 98.1163 | 97.5917 | 0.26559 | 4.73E-11  | 7.18E-10  | Up-regulated |
| NM_003746    | DYNLL1        | 8655   | 484.925 | 475.739 | 565.925 | 583.199 | 0.26551 | 5.27E-09  | 6.48E-08  | Up-regulated |
| NM_080822    | OVCA2         | 124641 | 67.3078 | 69.3599 | 80.6838 | 83.1109 | 0.26522 | 0.0009664 | 0.0049572 | Up-regulated |
| NM_020824    | ARHGAP21      | 57584  | 14.4084 | 14.5622 | 17.0018 | 17.7235 | 0.26488 | 1.32E-05  | 0.0001015 | Up-regulated |
| NM_000391    | TPP1          | 1200   | 101.757 | 108.054 | 125.894 | 125.345 | 0.26458 | 5.29E-09  | 6.49E-08  | Up-regulated |
| NM_001030006 | AP2B1         | 163    | 19.3378 | 21.1932 | 23.9969 | 24.5898 | 0.26453 | 0.0001676 | 0.0010265 | Up-regulated |
| NM_015472    | WWTR1         | 25937  | 120.644 | 116.999 | 143.327 | 141.127 | 0.26438 | 2.41E-15  | 5.25E-14  | Up-regulated |
| NM_014117    | C16orf72      | 29035  | 10.1157 | 10.4696 | 12.5784 | 12.13   | 0.26437 | 0.0061465 | 0.0244366 | Up-regulated |
| NM_012479    | YWHAG         | 7532   | 114.482 | 110.629 | 132.941 | 136.494 | 0.26418 | 6.15E-12  | 1.00E-10  | Up-regulated |
| NM_002961    | S100A4        | 6275   | 1581.54 | 1487.97 | 1786.61 | 1875.76 | 0.26415 | 8.50E-07  | 7.97E-06  | Up-regulated |
| NM_012448    | STAT5B        | 6777   | 9.09324 | 9.21833 | 10.7733 | 11.1934 | 0.26352 | 0.0029526 | 0.0129929 | Up-regulated |
| NM_025191    | EDEM3         | 80267  | 10.6587 | 10.8467 | 12.7045 | 13.0432 | 0.26267 | 0.0002005 | 0.0012081 | Up-regulated |
| NM_017921    | NPLOC4        | 55666  | 49.1144 | 49.5248 | 59.8806 | 57.9922 | 0.26173 | 5.51E-09  | 6.75E-08  | Up-regulated |
| NM_000398    | CYBSR3        | 1727   | 91.8896 | 90.5216 | 108.842 | 109.088 | 0.2617  | 3.17E-11  | 4.87E-10  | Up-regulated |
| NM_002570    | PCSK6         | 5046   | 61.2733 | 65.2141 | 72.9529 | 78.2691 | 0.26159 | 6.64E-06  | 5.41E-05  | Up-regulated |
| NM_017789    | SEMA4C        | 54910  | 43.2905 | 42.8694 | 53.2831 | 49.7405 | 0.26154 | 1.05E-05  | 8.20E-05  | Up-regulated |
| NM_004811    | LPXN          | 9404   | 28.451  | 27.1196 | 32.3429 | 34.1791 | 0.26146 | 0.0046443 | 0.0192241 | Up-regulated |
| NM_004712    | HGS           | 9146   | 98.5986 | 100.497 | 119.48  | 118.327 | 0.2613  | 1.90E-11  | 2.96E-10  | Up-regulated |
| NM_000157    | GBA           | 2629   | 52.6593 | 53.0113 | 62.0378 | 64.2428 | 0.26126 | 6.66E-06  | 5.42E-05  | Up-regulated |
| NM_006437    | nerase family | 143    | 14.8195 | 15.5969 | 18.0993 | 18.2673 | 0.26062 | 0.0001481 | 0.0009214 | Up-regulated |
| NM_006622    | PLK2          | 10769  | 18.7209 | 19.7729 | 23.2385 | 22.8361 | 0.26051 | 0.0024374 | 0.0110438 | Up-regulated |
| NM_033138    | CALD1         | 800    | 10.2042 | 10.4872 | 11.9234 | 12.8309 | 0.26049 | 0.0030388 | 0.0133078 | Up-regulated |
| NM_018028    | SAMD4B        | 55095  | 17.0418 | 17.8441 | 22.0323 | 19.7151 | 0.26008 | 0.0028371 | 0.0125686 | Up-regulated |
| NM_020461    | TUBGCP6       | 85378  | 10.454  | 10.4774 | 12.7585 | 12.2512 | 0.25978 | 0.0006682 | 0.0035703 | Up-regulated |
| NM_015626    | WSB1          | 26118  | 23.5461 | 22.5103 | 28.2686 | 26.7633 | 0.25929 | 0.0014179 | 0.0069376 | Up-regulated |
| NM_002966    | S100A10       | 6281   | 256.877 | 237.114 | 290.959 | 298.116 | 0.25907 | 8.45E-06  | 6.75E-05  | Up-regulated |
| NM_003272    | GPR137B       | 7107   | 38.389  | 38.6084 | 45.9231 | 45.8544 | 0.2569  | 0.0002239 | 0.0013326 | Up-regulated |
| NM_015299    | KHNYN         | 23351  | 12.642  | 12.4927 | 14.4562 | 15.5199 | 0.25659 | 0.0004911 | 0.0027073 | Up-regulated |
| NM_000099    | CST3          | 1471   | 169.478 | 169.722 | 197.298 | 206.273 | 0.25653 | 2.75E-05  | 0.0001987 | Up-regulated |
| NM_002870    | RAB13         | 5872   | 124.638 | 119.914 | 142.406 | 148.712 | 0.25642 | 2.07E-05  | 0.0001527 | Up-regulated |
| NM_021962    | ABR           | 29     | 34.6059 | 31.4113 | 41.7052 | 37.0351 | 0.25626 | 0.0017909 | 0.0084555 | Up-regulated |
| NM_001004128 | QSOX1         | 5768   | 27.7169 | 30.5095 | 36.3579 | 33.1041 | 0.25592 | 0.0060843 | 0.0242344 | Up-regulated |
| NM_018475    | TMEM165       | 55858  | 58.3398 | 55.2218 | 65.6865 | 69.5281 | 0.25583 | 0.0002037 | 0.0012257 | Up-regulated |
| NM_015277    | NEDD4L        | 23327  | 9.53788 | 10.3116 | 12.214  | 11.4379 | 0.25506 | 0.0013684 | 0.0067336 | Up-regulated |
| NM_021021    | SNTB1         | 6641   | 15.8176 | 16.0861 | 17.7118 | 20.315  | 0.2547  | 0.0054968 | 0.022247  | Up-regulated |
| NM_203346    | HDLBP         | 3069   | 48.3792 | 52.2846 | 61.615  | 58.1318 | 0.25428 | 1.32E-05  | 0.0001015 | Up-regulated |
| NM_003169    | SUPT5H        | 6829   | 55.6492 | 58.2755 | 69.4771 | 65.9789 | 0.25406 | 2.66E-06  | 2.31E-05  | Up-regulated |
| NM_001144759 | PHLDB1        | 23187  | 34.6804 | 36.2115 | 42.42   | 41.8444 | 0.25394 | 2.91E-07  | 2.91E-06  | Up-regulated |
| NM_001251    | CD68          | 968    | 83.4449 | 82.3141 | 99.47   | 97.5436 | 0.2538  | 1.08E-06  | 9.98E-06  | Up-regulated |
| NM_005109    | OXSRI         | 9943   | 25.1172 | 24.5704 | 29.2064 | 29.8855 | 0.25366 | 1.12E-05  | 8.73E-05  | Up-regulated |
| NM_003899    | ARHGEF7       | 8874   | 13.032  | 11.2372 | 14.5547 | 14.3612 | 0.25363 | 0.0111924 | 0.0407417 | Up-regulated |
| NM_001085487 | MYSM1         | 114803 | 8.47539 | 9.02982 | 10.2751 | 10.5581 | 0.25349 | 0.0010564 | 0.0053585 | Up-regulated |
| NM_194285    | SPTY2D1       | 144108 | 8.66412 | 8.75498 | 10.067  | 10.6776 | 0.25345 | 0.0039428 | 0.0167149 | Up-regulated |
| NM_017999    | RNF31         | 55072  | 17.5382 | 16.8522 | 21.0834 | 19.8393 | 0.25329 | 0.0023419 | 0.0106514 | Up-regulated |
| NM_002346    | LY6E          | 4061   | 1261.35 | 1204.15 | 1496.48 | 1429.88 | 0.25308 | 9.03E-10  | 1.20E-08  | Up-regulated |
| NM_001146105 | nerase family | 83666  | 22.7859 | 24.6645 | 30.1201 | 26.3706 | 0.25287 | 0.011487  | 0.0416461 | Up-regulated |
| NM_001321096 | SREBF1        | 6720   | 56.9346 | 61.9743 | 68.3499 | 72.9845 | 0.25273 | 8.32E-05  | 0.0005439 | Up-regulated |
| NM_005451    | PDLIM7        | 9260   | 42.2546 | 41.9151 | 51.0505 | 48.9767 | 0.25266 | 0.0009442 | 0.0048642 | Up-regulated |
| NM_004866    | SCAMP1        | 9522   | 7.89349 | 7.94748 | 9.20575 | 9.62718 | 0.2515  | 0.0035108 | 0.0151115 | Up-regulated |
| NM_000033    | ABCD1         | 215    | 61.4307 | 63.4134 | 77.6393 | 70.6073 | 0.2515  | 6.48E-05  | 0.0004333 | Up-regulated |
| NM_000235    | LIPA          | 3988   | 58.445  | 60.6561 | 69.5331 | 71.7846 | 0.25097 | 2.72E-06  | 2.35E-05  | Up-regulated |
| NM_016041    | DERL2         | 51009  | 12.8204 | 12.3853 | 14.5973 | 15.3562 | 0.25095 | 0.0035536 | 0.0152856 | Up-regulated |
| NM_000937    | POLR2A        | 5430   | 46.7233 | 47.971  | 56.9131 | 55.405  | 0.25089 | 5.65E-10  | 7.69E-09  | Up-regulated |
| NM_0004910   | PITPNM1       | 9600   | 12.264  | 12.8841 | 15.4432 | 14.4487 | 0.25081 | 0.005523  | 0.0223385 | Up-regulated |
| NM_053023    | ZFP91         | 80829  | 21.7323 | 21.6038 | 26.1468 | 25.2494 | 0.25049 | 7.53E-06  | 6.08E-05  | Up-regulated |
| NM_003590    | CUL3          | 8452   | 7.66179 | 7.18111 | 8.48331 | 9.15049 | 0.25042 | 0.0077061 | 0.0297274 | Up-regulated |
| NM_001034841 | ITPR1L2       | 162073 | 18.9255 | 20.0273 | 23.3852 | 22.8043 | 0.24985 | 1.16E-05  | 9.02E-05  | Up-regulated |
| NM_001162383 | ARHGEF2       | 9181   | 32.8837 | 29.7009 | 35.5884 | 38.6897 | 0.24966 | 0.0016001 | 0.0076741 | Up-regulated |
| NM_001198832 | PDE4DIP       | 9659   | 7.86895 | 7.50982 | 9.46712 | 8.78231 | 0.24935 | 0.003078  | 0.0134531 | Up-regulated |
| NM_015859    | GTF2A1        | 2957   | 7.01887 | 6.8109  | 8.41146 | 8.01461 | 0.2491  | 0.0073437 | 0.0285341 | Up-regulated |
| NM_000188    | HK1           | 3098   | 70.0987 | 69.3848 | 90.892  | 74.673  | 0.2487  | 0.0075981 | 0.0293999 | Up-regulated |
| NM_005065    | SEL1L         | 6400   | 10.9867 | 12.138  | 13.8041 | 13.6197 | 0.24852 | 0.001202  | 0.0059983 | Up-regulated |
| NR_002824    | HERC2P2       | 400322 | 15.3944 | 15.9287 | 18.7588 | 18.3575 | 0.24851 | 8.61E-05  | 0.0005606 | Up-regulated |
| NM_001199698 | BAG6          | 7917   | 44.4521 | 44.6076 | 56.3919 | 49.1861 | 0.24788 | 0.0017079 | 0.0081276 | Up-regulated |
| NM_018975    | TERF2IP       | 54386  | 43.8675 | 40.0009 | 48.5518 | 50.8375 | 0.24779 | 0.0017182 | 0.0081728 | Up-regulated |
| NM_002795    | PSMB3         | 5691   | 356.588 | 337.736 | 412.601 | 407.798 | 0.24713 | 1.65E-06  | 1.48E-05  | Up-regulated |
| NM_152609    | CNST          | 163882 | 9.70111 | 9.49965 | 11.6483 | 11.1053 | 0.24711 | 0.0044517 | 0.0185231 | Up-regulated |
| NM_007146    | VEZF1         | 7716   | 12.1978 | 11.0659 | 13.8405 | 13.7264 | 0.24702 | 0.0069434 | 0.0271581 | Up-regulated |
| NM_003831    | RIOK3         | 8780   | 14.8426 | 15.0403 | 17.912  | 17.4988 | 0.24693 | 0.0014981 | 0.0072558 | Up-regulated |
| NM_001174072 | SERINC5       | 256987 | 15.5814 | 16.2362 | 19.5223 | 18.1253 | 0.24553 | 0.0005061 | 0.0027765 | Up-regulated |
| NM_006795    | EHD1          | 10938  | 20.3808 | 21.8373 | 23.8969 | 26.0547 | 0.24539 | 0.004417  | 0.0183948 | Up-regulated |
| NM_002744    | PRKCZ         | 5590   | 20.4291 | 22.6833 | 25.5673 | 25.4743 | 0.24523 | 0.0134588 | 0.0475866 | Up-regulated |

|              |              |        |         |         |         |         |         |           |           |              |
|--------------|--------------|--------|---------|---------|---------|---------|---------|-----------|-----------|--------------|
| NM_002816    | PSMD12       | 5718   | 22.8704 | 22.6875 | 25.7096 | 28.1693 | 0.24522 | 0.0007881 | 0.0041472 | Up-regulated |
| NM_031954    | KCTD10       | 83892  | 17.2282 | 16.5726 | 18.8241 | 21.2025 | 0.24519 | 0.0070936 | 0.0276777 | Up-regulated |
| NM_004651    | USP11        | 8237   | 50.5468 | 49.5738 | 60.1952 | 58.0601 | 0.2448  | 1.99E-06  | 1.77E-05  | Up-regulated |
| NM_005345    | member 1A(F  | 3303   | 46.9826 | 46.4307 | 57.5334 | 52.8473 | 0.24476 | 0.0004857 | 0.0026837 | Up-regulated |
| NM_033225    | CSMD1        | 64478  | 2.90578 | 3.05847 | 3.48141 | 3.57765 | 0.24428 | 0.0088244 | 0.0332822 | Up-regulated |
| NM_001845    | COL4A1       | 1282   | 55.2652 | 59.1363 | 67.1119 | 67.9943 | 0.24424 | 3.21E-07  | 3.18E-06  | Up-regulated |
| NM_012200    | B3GAT3       | 26229  | 78.159  | 77.594  | 88.1306 | 95.8843 | 0.24417 | 0.0003972 | 0.0022392 | Up-regulated |
| NM_001199198 | TBC1D23      | 55773  | 14.59   | 15.457  | 17.5345 | 18.0018 | 0.24396 | 0.0034439 | 0.0148606 | Up-regulated |
| NM_015551    | SUSD5        | 26032  | 8.88299 | 8.392   | 10.2326 | 10.2041 | 0.24364 | 0.0093458 | 0.0349522 | Up-regulated |
| NM_014313    | TMEM50A      | 23585  | 66.0359 | 61.4717 | 75.1598 | 75.3272 | 0.24298 | 6.01E-05  | 0.0004041 | Up-regulated |
| NM_013995    | LAMP2        | 3920   | 53.3849 | 54.4311 | 62.8215 | 64.325  | 0.24278 | 4.59E-08  | 5.05E-07  | Up-regulated |
| NM_006471    | MYL12A       | 10627  | 193.426 | 177.11  | 219.235 | 217.736 | 0.24271 | 5.90E-05  | 0.0003976 | Up-regulated |
| NM_019096    | GTPBP2       | 54676  | 41.5574 | 39.8785 | 47.9353 | 48.1471 | 0.24263 | 2.49E-05  | 0.0001815 | Up-regulated |
| NM_003945    | ATP6V0E1     | 8992   | 456.353 | 437.398 | 530.858 | 521.807 | 0.24258 | 2.21E-08  | 2.52E-07  | Up-regulated |
| NM_017510    | TMED9        | 54732  | 170.146 | 169.63  | 202.198 | 198.243 | 0.24226 | 9.80E-13  | 1.71E-11  | Up-regulated |
| NM_030789    | HM13         | 81502  | 173.982 | 183.657 | 215.019 | 206.487 | 0.24201 | 2.02E-06  | 1.79E-05  | Up-regulated |
| NM_015092    | SMG1         | 23049  | 7.21499 | 7.6929  | 8.8349  | 8.75276 | 0.24201 | 8.74E-05  | 0.0005689 | Up-regulated |
| NM_006407    | ARL6IP5      | 10550  | 128.117 | 128.014 | 146.901 | 154.948 | 0.24195 | 2.97E-07  | 2.96E-06  | Up-regulated |
| NM_183381    | RNF13        | 11342  | 30.8987 | 32.1196 | 37.1817 | 37.1443 | 0.24189 | 0.0002586 | 0.0015185 | Up-regulated |
| NM_001009955 | SSBP3        | 23648  | 20.1196 | 20.1387 | 22.7954 | 24.7288 | 0.24184 | 0.0040397 | 0.0170768 | Up-regulated |
| NM_153273    | IP6K1        | 9807   | 23.9728 | 24.191  | 27.4677 | 29.3244 | 0.24152 | 0.0002127 | 0.0012743 | Up-regulated |
| NM_006927    | ST3GAL2      | 6483   | 20.4519 | 19.8938 | 25.0328 | 22.5488 | 0.24073 | 0.0027078 | 0.0120713 | Up-regulated |
| NM_018840    | C20orf24     | 55969  | 166.801 | 166.714 | 195.401 | 197.208 | 0.24072 | 1.46E-06  | 1.32E-05  | Up-regulated |
| NM_031231    | NECAB3       | 63941  | 28.0749 | 29.0021 | 33.8717 | 33.3908 | 0.24013 | 0.0050373 | 0.0206362 | Up-regulated |
| NM_001304743 | SLK          | 9748   | 7.30044 | 7.48215 | 8.7369  | 8.6868  | 0.24    | 0.0022705 | 0.0103611 | Up-regulated |
| NM_014862    | ARNT2        | 9915   | 30.3515 | 31.7002 | 36.2972 | 36.7479 | 0.23973 | 5.99E-07  | 5.73E-06  | Up-regulated |
| NM_006110    | CD2BP2       | 10421  | 40.5378 | 42.4383 | 49.3053 | 48.3709 | 0.23948 | 2.08E-05  | 0.0001537 | Up-regulated |
| NM_080426    | GNAS         | 2778   | 291.246 | 277.055 | 326.034 | 342.18  | 0.23878 | 1.58E-07  | 1.64E-06  | Up-regulated |
| NM_001270433 | CDK2AP1      | 8099   | 96.8658 | 103.087 | 118.021 | 116.837 | 0.23707 | 0.0006057 | 0.0032691 | Up-regulated |
| NM_001077183 | TSC2         | 7249   | 9.3364  | 10.1934 | 11.3326 | 11.6553 | 0.23676 | 0.009188  | 0.0344565 | Up-regulated |
| NM_001042559 | EIF4G2       | 1982   | 51.3179 | 50.2678 | 56.0335 | 63.4138 | 0.23676 | 0.0011134 | 0.0056104 | Up-regulated |
| NM_016823    | CRK          | 1398   | 24.1463 | 22.7436 | 26.9678 | 28.1339 | 0.23616 | 0.0019751 | 0.0091955 | Up-regulated |
| NM_021939    | FKBP10       | 60681  | 259.123 | 260.15  | 309.765 | 299.38  | 0.23554 | 1.62E-12  | 2.78E-11  | Up-regulated |
| NM_004395    | DBN1         | 1627   | 109.099 | 111.9   | 131.539 | 127.721 | 0.23542 | 1.07E-08  | 1.26E-07  | Up-regulated |
| NM_023935    | DDRGGK1      | 65992  | 70.3611 | 65.1436 | 81.7869 | 77.366  | 0.23541 | 0.0036076 | 0.0154829 | Up-regulated |
| NM_003482    | KMT2D        | 8085   | 7.43453 | 8.3455  | 9.50814 | 9.0278  | 0.23504 | 0.0018803 | 0.0088083 | Up-regulated |
| NM_001312    | CRIP2        | 1397   | 86.0376 | 84.5845 | 105.125 | 95.1118 | 0.23479 | 0.0030783 | 0.0134531 | Up-regulated |
| NM_001013251 | SLC3A2       | 6520   | 253.76  | 253.902 | 299.195 | 295.803 | 0.23468 | 3.60E-13  | 6.57E-12  | Up-regulated |
| NM_012194    | KIAA1549L    | 25758  | 5.07542 | 5.43862 | 6.35585 | 5.99786 | 0.23453 | 0.006057  | 0.0241452 | Up-regulated |
| NM_012289    | KEAP1        | 9817   | 46.4293 | 44.8348 | 53.9955 | 53.031  | 0.23399 | 7.66E-05  | 0.0005045 | Up-regulated |
| NM_000297    | PKD2         | 5311   | 14.1211 | 14.1196 | 15.9824 | 17.171  | 0.23387 | 0.002426  | 0.0109947 | Up-regulated |
| NM_003900    | SQSTM1       | 8878   | 242.708 | 242.059 | 291.042 | 276.98  | 0.23375 | 9.21E-10  | 1.23E-08  | Up-regulated |
| NM_000528    | MAN2B1       | 4125   | 49.2262 | 52.7848 | 61.1305 | 58.4525 | 0.23336 | 0.0001677 | 0.0010268 | Up-regulated |
| NM_002999    | SDC4         | 6385   | 30.2164 | 28.0451 | 33.9652 | 34.3915 | 0.23327 | 0.0025067 | 0.0113174 | Up-regulated |
| NM_138962    | MSI2         | 124540 | 13.4386 | 12.6352 | 15.2423 | 15.3329 | 0.23288 | 0.0008728 | 0.0045443 | Up-regulated |
| NM_002890    | RASA1        | 5921   | 12.6561 | 12.1688 | 14.6983 | 14.4175 | 0.23247 | 0.0050727 | 0.020759  | Up-regulated |
| NM_007126    | VCP          | 7415   | 87.0566 | 89.2848 | 103.397 | 103.045 | 0.23235 | 6.12E-10  | 8.28E-09  | Up-regulated |
| NM_004892    | seudogene(S) | 9554   | 54.7427 | 53.4247 | 62.3697 | 64.38   | 0.23235 | 0.000311  | 0.0017969 | Up-regulated |
| NM_003022    | SH3BGRL      | 6451   | 37.7196 | 36.2124 | 43.0701 | 43.5658 | 0.23226 | 0.0014812 | 0.0071869 | Up-regulated |
| NM_031918    | KLF16        | 83855  | 40.4379 | 39.5836 | 47.7922 | 45.9613 | 0.23226 | 0.0001151 | 0.000732  | Up-regulated |
| NM_003507    | FZD7         | 8324   | 23.7884 | 26.5152 | 29.5645 | 29.4275 | 0.23211 | 0.0031656 | 0.0137715 | Up-regulated |
| NM_006083    | IK           | 3550   | 72.618  | 68.51   | 80.4171 | 84.7446 | 0.23103 | 0.0003505 | 0.0020012 | Up-regulated |
| NM_004936    | CDKN2B       | 1030   | 17.2658 | 16.6316 | 20.3914 | 19.3125 | 0.23102 | 0.0037333 | 0.0159598 | Up-regulated |
| NM_004326    | BCL9         | 607    | 8.75471 | 8.71504 | 10.0071 | 10.4535 | 0.23094 | 0.0052331 | 0.0213546 | Up-regulated |
| NM_004124    | GMPFB        | 2764   | 40.613  | 38.0582 | 44.156  | 47.9182 | 0.23055 | 0.0006524 | 0.0034927 | Up-regulated |
| NM_002046    | GAPDH        | 2597   | 3579.77 | 3426.7  | 4112.12 | 4075.17 | 0.23054 | 8.95E-11  | 1.33E-09  | Up-regulated |
| NR_027451    | NORAD        | 647979 | 95.7644 | 95.502  | 111.03  | 112.584 | 0.23047 | 1.14E-13  | 2.18E-12  | Up-regulated |
| NM_001270960 | NOSIP        | 51070  | 71.1443 | 70.0291 | 82.1725 | 82.8732 | 0.23015 | 0.0010452 | 0.005307  | Up-regulated |
| NM_016272    | TOB2         | 10766  | 15.102  | 15.5033 | 18.0512 | 17.7749 | 0.23007 | 0.0014905 | 0.0072284 | Up-regulated |
| NM_018939    | PCDHB6       | 56130  | 15.5447 | 15.746  | 18.699  | 17.9533 | 0.22998 | 0.0082378 | 0.0314548 | Up-regulated |
| NM_025160    | WDR26        | 80232  | 15.6369 | 17.0149 | 19.4131 | 18.7878 | 0.2298  | 0.0010526 | 0.0053405 | Up-regulated |
| NM_181553    | CMTM3        | 123920 | 28.4756 | 29.306  | 32.4524 | 35.1471 | 0.22947 | 0.0129306 | 0.0459912 | Up-regulated |
| NM_001303614 | SAMD4B       | 55095  | 16.3719 | 14.8946 | 18.0195 | 18.5803 | 0.22928 | 0.0129561 | 0.0460563 | Up-regulated |
| NM_005938    | FOXO4        | 4303   | 20.2193 | 18.7671 | 22.473  | 23.1267 | 0.22897 | 0.005305  | 0.0216043 | Up-regulated |
| NM_015353    | KCTD2        | 23510  | 18.1569 | 17.6912 | 21.3799 | 20.525  | 0.22861 | 0.0028737 | 0.0127044 | Up-regulated |
| NM_032409    | PINK1        | 65018  | 43.598  | 44.1481 | 51.1779 | 51.3064 | 0.2284  | 6.13E-05  | 0.0004121 | Up-regulated |
| NM_006710    | COP8         | 10920  | 45.7296 | 41.114  | 49.1605 | 52.3792 | 0.22827 | 0.0062408 | 0.0247756 | Up-regulated |
| NM_005040    | PRCP         | 5547   | 18.6815 | 18.1121 | 21.3863 | 21.628  | 0.22817 | 0.0021381 | 0.0098509 | Up-regulated |
| NM_153831    | PTK2         | 5747   | 25.5843 | 22.2061 | 27.2583 | 28.6234 | 0.2279  | 0.0093344 | 0.0349231 | Up-regulated |
| NM_021095    | SLC5A6       | 8884   | 50.8585 | 52.9378 | 62.0987 | 59.0801 | 0.22739 | 5.92E-05  | 0.0003985 | Up-regulated |
| NM_004331    | BNIP3L       | 665    | 26.1297 | 25.5105 | 29.2133 | 31.0746 | 0.22721 | 0.0011888 | 0.0059415 | Up-regulated |
| NM_014294    | TRAM1        | 23471  | 69.9867 | 68.3466 | 80.4059 | 80.9547 | 0.22691 | 2.65E-07  | 2.66E-06  | Up-regulated |
| NM_004455    | EXTL1        | 2134   | 21.8619 | 21.6757 | 25.5845 | 25.2001 | 0.22636 | 0.000431  | 0.002411  | Up-regulated |
| NM_001407    | CELSR3       | 1951   | 11.4169 | 13.0982 | 14.8574 | 13.7783 | 0.22635 | 0.008566  | 0.0325002 | Up-regulated |
| NM_000232    | SGCB         | 6443   | 11.777  | 11.6613 | 14.1987 | 13.176  | 0.22606 | 0.0135929 | 0.0479719 | Up-regulated |
| NM_015627    | LDLRAP1      | 26119  | 27.7775 | 27.8496 | 32.211  | 32.6731 | 0.226   | 0.0007848 | 0.0041346 | Up-regulated |
| NM_176812    | CHMP4B       | 128866 | 120.186 | 117.226 | 140.563 | 135.903 | 0.22509 | 7.65E-06  | 6.16E-05  | Up-regulated |
| NM_002224    | ITPR3        | 3710   | 26.9103 | 28.3619 | 32.7547 | 31.6522 | 0.22497 | 6.54E-06  | 5.35E-05  | Up-regulated |
| NM_013237    | PRELID1      | 27166  | 258.516 | 259.365 | 306.314 | 296.52  | 0.22496 | 5.00E-08  | 5.48E-07  | Up-regulated |
| NM_002714    | PPP1R10      | 5514   | 20.5635 | 19.0516 | 23.4734 | 22.7007 | 0.22445 | 0.0019885 | 0.0092533 | Up-regulated |
| NM_024408    | NOTCH2       | 4853   | 10.1188 | 11.307  | 12.7443 | 12.225  | 0.22374 | 0.0034811 | 0.0150007 | Up-regulated |
| NM_022130    | GOLPH3       | 64083  | 30.0855 | 29.4567 | 33.3439 | 36.0384 | 0.22362 | 0.0039814 | 0.0168677 | Up-regulated |
| NM_005443    | PAPSS1       | 9061   | 35.6546 | 32.9498 | 39.8188 | 40.0624 | 0.22322 | 0.0026308 | 0.0117857 | Up-regulated |
| NM_001128431 | SLC39A14     | 23516  | 49.6199 | 51.7273 | 57.3389 | 60.6128 | 0.22321 | 2.11E-05  | 0.0001559 | Up-regulated |

|              |              |        |         |         |         |         |         |           |           |              |
|--------------|--------------|--------|---------|---------|---------|---------|---------|-----------|-----------|--------------|
| NM_015268    | member C13(C | 23317  | 11.552  | 10.2132 | 12.3152 | 13.0377 | 0.22263 | 0.0118953 | 0.0428515 | Up-regulated |
| NM_014601    | EHD2         | 30846  | 28.046  | 27.3978 | 33.3037 | 31.2374 | 0.22261 | 0.0010926 | 0.0055198 | Up-regulated |
| NM_024309    | TNIP2        | 79155  | 30.8027 | 30.4152 | 35.8276 | 35.4229 | 0.22257 | 0.0057944 | 0.0232258 | Up-regulated |
| NM_006775    | QKI          | 9444   | 6.47569 | 6.37063 | 7.62969 | 7.32104 | 0.22221 | 0.0042594 | 0.0178278 | Up-regulated |
| NM_006858    | TMED1        | 11018  | 41.3305 | 45.3072 | 51.3038 | 49.583  | 0.2222  | 0.009365  | 0.0350172 | Up-regulated |
| NM_001084    | PLOD3        | 8985   | 336.072 | 334.46  | 393.802 | 384.866 | 0.22108 | 2.71E-14  | 5.46E-13  | Up-regulated |
| NM_001940    | ATN1         | 1822   | 29.4806 | 32.3282 | 37.5294 | 34.331  | 0.22045 | 0.0052806 | 0.0215268 | Up-regulated |
| NM_004240    | TRIP10       | 9322   | 27.676  | 26.8719 | 31.2479 | 32.1623 | 0.22013 | 0.0103259 | 0.0380661 | Up-regulated |
| NM_001042545 | LTPB4        | 8425   | 47.2152 | 48.9083 | 57.6043 | 53.991  | 0.21954 | 5.00E-05  | 0.0003424 | Up-regulated |
| NM_001319    | CSNK1G2      | 1455   | 62.5687 | 65.3982 | 76.2037 | 72.3112 | 0.21917 | 0.0001042 | 0.0006692 | Up-regulated |
| NM_005313    | PDIA3        | 2923   | 142.853 | 146.383 | 166.771 | 168.641 | 0.21888 | 5.01E-10  | 6.88E-09  | Up-regulated |
| NM_001257391 | CD63         | 967    | 100.507 | 97.9564 | 113.614 | 116.58  | 0.21862 | 0.0023016 | 0.0104831 | Up-regulated |
| NM_005809    | PRDX2        | 7001   | 154.977 | 148.957 | 172.334 | 179.914 | 0.2182  | 0.0003526 | 0.002012  | Up-regulated |
| NM_003477    | PDHX         | 8050   | 16.8785 | 16.9802 | 19.5529 | 19.7711 | 0.21797 | 0.0111772 | 0.040702  | Up-regulated |
| NM_001330262 | NFE2L1       | 4779   | 95.5267 | 93.4758 | 108.939 | 110.03  | 0.21742 | 7.44E-11  | 1.11E-09  | Up-regulated |
| NM_001128833 | ZBTB4        | 57659  | 22.7    | 25.9086 | 29.4994 | 26.9235 | 0.21734 | 0.0137044 | 0.0483206 | Up-regulated |
| NM_020695    | REXO1        | 57455  | 15.0737 | 15.9545 | 18.0777 | 17.8919 | 0.21674 | 0.0040327 | 0.0170546 | Up-regulated |
| NM_003101    | SOAT1        | 6646   | 15.5304 | 16.8188 | 18.4021 | 19.1017 | 0.2167  | 0.0018293 | 0.0086069 | Up-regulated |
| NM_006271    | S100A1       | 6271   | 1060.63 | 1001.66 | 1222.64 | 1159.78 | 0.21626 | 2.12E-05  | 0.0001563 | Up-regulated |
| NM_015331    | NCSTN        | 23385  | 28.8769 | 28.3808 | 32.8413 | 33.4453 | 0.21525 | 0.0013101 | 0.0064781 | Up-regulated |
| NM_021639    | GPBP1L1      | 60313  | 17.6251 | 17.2769 | 19.5104 | 20.9089 | 0.21483 | 0.008219  | 0.0313984 | Up-regulated |
| NM_005736    | ACTR1A       | 10121  | 46.392  | 43.5069 | 52.1685 | 51.8469 | 0.2144  | 0.0004438 | 0.0024729 | Up-regulated |
| NM_203459    | CAMSA2       | 23271  | 7.36891 | 7.49564 | 8.68718 | 8.51987 | 0.21383 | 0.0081023 | 0.0310178 | Up-regulated |
| NM_005934    | MLLT1        | 4298   | 42.2779 | 42.9669 | 51.4863 | 47.0958 | 0.21375 | 0.0005723 | 0.0031047 | Up-regulated |
| NM_030806    | C1orf21      | 81563  | 10.1737 | 10.4232 | 11.8902 | 11.9332 | 0.21366 | 0.0002421 | 0.00143   | Up-regulated |
| NM_017813    | IMPAD1       | 54928  | 14.2603 | 15.2742 | 17.2784 | 16.8753 | 0.21318 | 0.001388  | 0.0068175 | Up-regulated |
| NM_001690    | ATP6V1A      | 523    | 28.0415 | 26.836  | 31.5779 | 31.8477 | 0.21314 | 0.00018   | 0.0010933 | Up-regulated |
| NM_198252    | GSN          | 2934   | 394.505 | 371.836 | 452.994 | 431.955 | 0.2126  | 2.82E-06  | 2.44E-05  | Up-regulated |
| NM_032582    | USP32        | 84669  | 15.4404 | 15.324  | 17.2039 | 18.3355 | 0.21188 | 0.0009613 | 0.0049364 | Up-regulated |
| NM_139279    | MCFD2        | 90411  | 25.306  | 26.6947 | 30.0022 | 30.0524 | 0.21157 | 0.0007422 | 0.0039317 | Up-regulated |
| NM_016147    | PPME1        | 51400  | 23.8102 | 23.2575 | 27.7674 | 26.6238 | 0.21148 | 0.0077321 | 0.0298098 | Up-regulated |
| NM_005967    | NAB2         | 4665   | 37.7585 | 38.6831 | 44.6969 | 43.5454 | 0.21147 | 0.0006955 | 0.0037015 | Up-regulated |
| NM_006801    | KDELRL1      | 10945  | 126.293 | 125.507 | 142.781 | 147.714 | 0.21133 | 2.05E-05  | 0.0001518 | Up-regulated |
| NM_001300905 | BAZ2A        | 11176  | 14.0581 | 13.719  | 15.5579 | 16.5045 | 0.21132 | 0.0004968 | 0.0027356 | Up-regulated |
| NM_0058243   | BRD4         | 23476  | 20.6256 | 22.2489 | 25.5482 | 23.9757 | 0.21132 | 0.0038544 | 0.0164024 | Up-regulated |
| NM_024602    | HECTD3       | 79654  | 30.5162 | 28.405  | 33.7951 | 34.2164 | 0.21101 | 0.0015414 | 0.0074355 | Up-regulated |
| NM_025201    | PLEKH02      | 80301  | 27.3817 | 26.9981 | 31.5895 | 31.1502 | 0.21079 | 0.0004847 | 0.0026793 | Up-regulated |
| NM_024881    | SLC35E1      | 79939  | 25.4739 | 26.2033 | 29.9201 | 29.6917 | 0.21039 | 0.0001062 | 0.00068   | Up-regulated |
| NM_020839    | WDR48        | 57599  | 15.688  | 15.2646 | 17.9463 | 17.7447 | 0.20915 | 0.0067223 | 0.0264068 | Up-regulated |
| NM_006353    | HMGN4        | 10473  | 34.1137 | 34.3063 | 38.9049 | 39.9816 | 0.20911 | 0.006822  | 0.0267382 | Up-regulated |
| NM_020132    | AGPAT3       | 56894  | 7.7304  | 8.0586  | 9.0511  | 9.17044 | 0.20909 | 0.0137338 | 0.0483977 | Up-regulated |
| NM_175852    | TXLNA        | 200081 | 29.5621 | 29.3843 | 33.3718 | 34.5314 | 0.20845 | 9.05E-05  | 0.0005868 | Up-regulated |
| NM_138389    | FAM114A1     | 92689  | 20.0601 | 18.6359 | 23.1135 | 21.5103 | 0.20827 | 0.0105992 | 0.0389159 | Up-regulated |
| NM_130854    | PTPRS        | 5802   | 35.0758 | 38.8183 | 43.8632 | 41.2725 | 0.20796 | 0.0019326 | 0.0090262 | Up-regulated |
| NM_001302633 | CAPNS1       | 826    | 183.475 | 173.016 | 207.389 | 202.625 | 0.20728 | 0.0001163 | 0.0007386 | Up-regulated |
| NM_024682    | TBC1D17      | 79735  | 31.8517 | 31.3717 | 35.8343 | 36.9654 | 0.20724 | 0.0043993 | 0.0183295 | Up-regulated |
| NM_002953    | RPS6KA1      | 6195   | 38.435  | 39.3668 | 46.3059 | 43.2353 | 0.20701 | 0.0013727 | 0.0067528 | Up-regulated |
| NM_170665    | ATP2A2       | 488    | 23.3393 | 25.0422 | 27.7893 | 27.868  | 0.2064  | 0.0001674 | 0.0010261 | Up-regulated |
| NM_003968    | UBA3         | 9039   | 67.4667 | 62.7457 | 74.6121 | 75.0965 | 0.20572 | 0.001022  | 0.005206  | Up-regulated |
| NM_016289    | CAB39        | 51719  | 17.7646 | 18.3198 | 20.6737 | 20.832  | 0.20562 | 0.0052642 | 0.0214645 | Up-regulated |
| NM_001204426 | LIMK1        | 3984   | 28.9735 | 28.3529 | 32.4036 | 33.4882 | 0.20513 | 0.0018803 | 0.0088083 | Up-regulated |
| NM_015638    | TRPC4AP      | 26133  | 37.5678 | 40.1624 | 43.6173 | 45.6864 | 0.20433 | 0.002256  | 0.0103134 | Up-regulated |
| NM_000701    | ATP1A1       | 476    | 531.685 | 541.187 | 621.912 | 609.327 | 0.20391 | 2.72E-12  | 4.55E-11  | Up-regulated |
| NM_015523    | REXO2        | 25996  | 101.19  | 95.7149 | 115.814 | 110.141 | 0.20358 | 0.0040946 | 0.0172628 | Up-regulated |
| NM_017644    | KLHL24       | 54800  | 10.6764 | 10.7018 | 12.1431 | 12.4096 | 0.20355 | 0.0024672 | 0.0111654 | Up-regulated |
| NM_030926    | ITM2C        | 81618  | 206.556 | 209.587 | 240.194 | 236.941 | 0.20269 | 5.11E-09  | 6.29E-08  | Up-regulated |
| NM_012433    | SF3B1        | 23451  | 44.4453 | 46.5045 | 51.3442 | 52.9474 | 0.20205 | 8.20E-05  | 0.0005371 | Up-regulated |
| NM_030790    | ITFG1        | 81533  | 21.1467 | 20.8588 | 24.4776 | 23.7251 | 0.20145 | 0.0058508 | 0.0234264 | Up-regulated |
| NM_014866    | SEC16A       | 9919   | 6.52863 | 6.48829 | 7.32098 | 7.60965 | 0.20114 | 0.0105392 | 0.0387256 | Up-regulated |
| NM_014255    | CNPY2        | 10330  | 101.174 | 93.4822 | 109.378 | 113.61  | 0.20091 | 0.0057122 | 0.022976  | Up-regulated |
| NM_148894    | BOD1L1       | 259282 | 5.74362 | 5.93778 | 6.52474 | 6.86868 | 0.20004 | 0.0121359 | 0.0436358 | Up-regulated |
| NM_003295    | TPT1         | 7178   | 184.368 | 174.957 | 202.637 | 208.701 | 0.20002 | 5.55E-07  | 5.34E-06  | Up-regulated |
| NM_001751    | CARS         | 833    | 32.2579 | 31.3565 | 36.616  | 36.2253 | 0.19934 | 0.0042275 | 0.0177253 | Up-regulated |
| NM_020765    | UBR4         | 23352  | 19.7199 | 22.2158 | 24.7536 | 23.2738 | 0.19911 | 0.0047308 | 0.0195229 | Up-regulated |
| NM_021020    | LZTS1        | 11178  | 39.8427 | 41.3297 | 48.2061 | 44.7072 | 0.19908 | 0.0006053 | 0.003268  | Up-regulated |
| NM_006145    | member B1(C  | 3337   | 91.1712 | 86.1355 | 103.009 | 99.796  | 0.19865 | 0.000178  | 0.0010833 | Up-regulated |
| NM_015164    | PLEKHM2      | 23207  | 58.7127 | 60.6039 | 68.9192 | 67.5509 | 0.1986  | 7.34E-06  | 5.94E-05  | Up-regulated |
| NM_020410    | ATP13A1      | 57130  | 42.6534 | 44.3924 | 51.948  | 47.6167 | 0.19793 | 0.002596  | 0.0116491 | Up-regulated |
| NM_000302    | PLOD1        | 5351   | 236.227 | 244.741 | 281.349 | 268.173 | 0.19737 | 2.11E-06  | 1.86E-05  | Up-regulated |
| NM_001722    | POLR3D       | 661    | 34.7047 | 34.0018 | 38.7077 | 39.8771 | 0.19696 | 0.0123341 | 0.0442484 | Up-regulated |
| NM_013446    | MKRN1        | 23608  | 48.9172 | 49.4463 | 56.4379 | 55.9517 | 0.19686 | 8.48E-05  | 0.000553  | Up-regulated |
| NM_001660    | ARF4         | 378    | 187.295 | 180.072 | 206.253 | 213.255 | 0.19674 | 1.21E-05  | 9.36E-05  | Up-regulated |
| NM_003144    | SSR1         | 6745   | 19.3666 | 19.6102 | 21.7836 | 22.7453 | 0.19659 | 5.76E-05  | 0.0003896 | Up-regulated |
| NM_0033549   | TRIM41       | 90933  | 28.4171 | 28.0918 | 33.1223 | 31.4471 | 0.19648 | 0.0022634 | 0.0103338 | Up-regulated |
| NM_015046    | SETX         | 23064  | 7.47092 | 7.61042 | 8.55299 | 8.67219 | 0.19575 | 0.0026645 | 0.0119199 | Up-regulated |
| NM_052876    | NACC1        | 112939 | 38.9362 | 38.6076 | 45.5513 | 42.9444 | 0.19522 | 0.0003481 | 0.0019895 | Up-regulated |
| NM_152221    | CSNK1E       | 1454   | 103.13  | 99.6763 | 116.732 | 114.542 | 0.19475 | 4.50E-06  | 3.78E-05  | Up-regulated |
| NM_002950    | RPN1         | 6184   | 156.956 | 156.687 | 179.439 | 178.171 | 0.19465 | 3.18E-08  | 3.55E-07  | Up-regulated |
| NM_003872    | NRP2         | 8828   | 38.2455 | 37.3373 | 42.7883 | 43.415  | 0.19445 | 2.32E-06  | 2.03E-05  | Up-regulated |
| NM_002096    | GTF2F1       | 2962   | 47.0498 | 44.7388 | 52.6009 | 52.0849 | 0.19421 | 0.0015326 | 0.0074006 | Up-regulated |
| NM_152924    | ABHD2        | 11057  | 23.9481 | 23.9963 | 27.0184 | 27.6412 | 0.19399 | 8.57E-06  | 6.84E-05  | Up-regulated |
| NM_002087    | GRN          | 2896   | 341.204 | 351.236 | 403.798 | 385.142 | 0.19351 | 1.20E-06  | 1.10E-05  | Up-regulated |
| NM_020150    | SAR1A        | 56681  | 29.4683 | 30.7477 | 34.5237 | 34.1302 | 0.19306 | 0.0040442 | 0.0170768 | Up-regulated |
| NM_031311    | CPVL         | 54504  | 39.0782 | 38.954  | 44.4914 | 44.4533 | 0.19301 | 0.0137407 | 0.0484129 | Up-regulated |



|              |                |        |         |         |         |         |         |           |           |              |
|--------------|----------------|--------|---------|---------|---------|---------|---------|-----------|-----------|--------------|
| NM_006979    | SLC39A7        | 7922   | 71.7024 | 69.2644 | 80.348  | 80.0809 | 0.19152 | 0.0001348 | 0.0008459 | Up-regulated |
| NM_006855    | KDELR3         | 11015  | 111.554 | 104.122 | 120.63  | 124.821 | 0.19133 | 0.0012277 | 0.0061151 | Up-regulated |
| NM_007114    | TMF1           | 7110   | 10.675  | 10.4439 | 12.2197 | 11.8385 | 0.19129 | 0.0073911 | 0.0286745 | Up-regulated |
| NM_005273    | GNB2           | 2783   | 148.879 | 151.023 | 170.647 | 170.428 | 0.19106 | 7.11E-06  | 5.76E-05  | Up-regulated |
| NM_130787    | AP2A1          | 160    | 48.9761 | 47.1453 | 55.025  | 54.2717 | 0.19026 | 0.0002107 | 0.0012641 | Up-regulated |
| NM_016107    | ZFR            | 51663  | 24.1468 | 23.3684 | 26.228  | 27.8134 | 0.1898  | 0.0031253 | 0.0136149 | Up-regulated |
| NM_002356    | MARCKS         | 4082   | 55.6638 | 54.9132 | 63.1025 | 62.4936 | 0.18895 | 4.84E-06  | 4.05E-05  | Up-regulated |
| NM_001099784 | FBXL19         | 54620  | 47.3368 | 46.7112 | 56.2746 | 50.6123 | 0.18864 | 0.0056623 | 0.0228104 | Up-regulated |
| NM_005186    | CAPN1          | 823    | 51.1008 | 52.7332 | 56.0238 | 61.9101 | 0.18787 | 0.006798  | 0.0266659 | Up-regulated |
| NM_012478    | WBP2           | 23558  | 188.211 | 182.241 | 211.207 | 209.018 | 0.18723 | 1.60E-06  | 1.44E-05  | Up-regulated |
| NM_021009    | UBC            | 7316   | 409.762 | 391.345 | 457.759 | 450.788 | 0.18694 | 1.83E-07  | 1.88E-06  | Up-regulated |
| NM_020470    | YIF1A          | 10897  | 100.799 | 108.123 | 120.335 | 116.646 | 0.18681 | 0.0087353 | 0.0330048 | Up-regulated |
| NM_001286760 | CERCAM         | 51148  | 56.7677 | 56.6206 | 66.5435 | 62.058  | 0.18611 | 0.0040456 | 0.017079  | Up-regulated |
| NM_002788    | PSMA3          | 5684   | 134.676 | 136.31  | 149.819 | 157.196 | 0.1856  | 0.0036623 | 0.0156966 | Up-regulated |
| NM_016333    | SRRM2          | 23524  | 47.8427 | 52.1502 | 58.74   | 54.5247 | 0.1839  | 0.0029116 | 0.0128391 | Up-regulated |
| NM_001300    | KLF6           | 1316   | 63.8542 | 59.1763 | 69.6052 | 69.6849 | 0.18365 | 0.0003601 | 0.0020517 | Up-regulated |
| NM_015338    | ASXL1          | 171023 | 21.8535 | 22.9878 | 26.2643 | 24.5216 | 0.18353 | 0.0036531 | 0.0156609 | Up-regulated |
| NM_033008    | ling protein 4 | 57060  | 74.2839 | 70.4399 | 81.2348 | 82.5118 | 0.18312 | 0.0015561 | 0.0074948 | Up-regulated |
| NM_024577    | SH3TC2         | 79628  | 4.06469 | 4.21385 | 4.61667 | 4.75379 | 0.18291 | 0.0023166 | 0.0105416 | Up-regulated |
| NM_019116    | UBFD1          | 56061  | 29.2587 | 27.6312 | 32.4881 | 31.8678 | 0.18259 | 0.0016113 | 0.0077242 | Up-regulated |
| NM_003262    | SEC62          | 7095   | 19.4029 | 18.7684 | 21.1328 | 22.0466 | 0.18226 | 0.0019206 | 0.0089811 | Up-regulated |
| NM_013374    | PDCD6IP        | 10015  | 26.921  | 27.5685 | 30.283  | 31.3604 | 0.18225 | 0.0004306 | 0.0024093 | Up-regulated |
| NM_016072    | GOLT1B         | 51026  | 50.8114 | 48.7077 | 53.1548 | 59.4641 | 0.18209 | 0.013048  | 0.0463397 | Up-regulated |
| NM_006280    | SSR4           | 6748   | 296.139 | 286.378 | 324.539 | 333.128 | 0.18179 | 0.0012156 | 0.006058  | Up-regulated |
| NM_031243    | HNRNPA2B1      | 3181   | 109.885 | 104.289 | 118.435 | 123.634 | 0.18154 | 8.98E-05  | 0.0005832 | Up-regulated |
| NM_001679    | ATP1B3         | 483    | 144.711 | 145.384 | 159.162 | 168.636 | 0.18146 | 0.0002035 | 0.0012246 | Up-regulated |
| NM_032888    | COL27A1        | 85301  | 18.9392 | 20.4545 | 22.1715 | 22.3577 | 0.18089 | 0.0030484 | 0.0133409 | Up-regulated |
| NM_001033026 | TMEM259        | 91304  | 74.8271 | 75.8207 | 88.4858 | 81.689  | 0.18041 | 0.0021733 | 0.009987  | Up-regulated |
| NM_014931    | PPP6R1         | 22870  | 63.5032 | 62.2933 | 71.6515 | 70.3309 | 0.17956 | 3.54E-05  | 0.0002501 | Up-regulated |
| NM_000404    | GLB1           | 2720   | 51.9781 | 56.4149 | 61.3344 | 61.0517 | 0.17953 | 0.0056418 | 0.0227518 | Up-regulated |
| NM_014275    | cetylglucosan  | 11282  | 117.17  | 113.836 | 132.269 | 128.372 | 0.17932 | 3.55E-05  | 0.0002503 | Up-regulated |
| NM_001193416 | DDX3X          | 1654   | 48.3837 | 47.9636 | 52.9211 | 55.8217 | 0.17927 | 0.0002526 | 0.0014876 | Up-regulated |
| NM_007260    | LYPLA2         | 11313  | 118.796 | 115.303 | 129.589 | 134.436 | 0.17906 | 0.0006196 | 0.0033367 | Up-regulated |
| NM_003370    | VASP           | 7408   | 55.0399 | 51.8396 | 62.5057 | 58.1359 | 0.1789  | 0.0117947 | 0.0425292 | Up-regulated |
| NM_004663    | RAB11A         | 8766   | 29.2779 | 29.406  | 33.0791 | 33.1333 | 0.17879 | 0.0004051 | 0.0022827 | Up-regulated |
| NM_001539    | member A1(E    | 3301   | 132.506 | 125.028 | 142.799 | 147.698 | 0.17873 | 0.0002679 | 0.0015683 | Up-regulated |
| NM_016113    | TRPV2          | 51393  | 202.405 | 215.657 | 239.307 | 232.18  | 0.17844 | 0.0001087 | 0.0006954 | Up-regulated |
| NM_003712    | PLPP2          | 8612   | 102.937 | 102.408 | 115.882 | 115.607 | 0.17805 | 0.0017285 | 0.0082072 | Up-regulated |
| NM_001271875 | CUEDC1         | 404093 | 38.0922 | 40.5035 | 45.7416 | 42.8897 | 0.17772 | 0.0074847 | 0.0289964 | Up-regulated |
| NM_001130111 | ABHD17A        | 81926  | 116.758 | 110.069 | 133.624 | 122.168 | 0.17771 | 0.0107366 | 0.0393676 | Up-regulated |
| NM_004168    | SDHA           | 6389   | 54.8565 | 56.038  | 61.4551 | 63.5619 | 0.17767 | 0.0008974 | 0.0046545 | Up-regulated |
| NM_170679    | SKP1           | 6500   | 79.1051 | 77.1148 | 85.4516 | 90.4537 | 0.17609 | 0.0026209 | 0.0117444 | Up-regulated |
| NM_002556    | OSBP           | 5007   | 14.9356 | 15.1644 | 17.2288 | 16.6865 | 0.17601 | 0.0122914 | 0.0441204 | Up-regulated |
| NM_004339    | PTTG1IP        | 754    | 162.441 | 157.256 | 178.473 | 180.885 | 0.17417 | 1.62E-06  | 1.46E-05  | Up-regulated |
| NM_006660    | CLPX           | 10845  | 16.7139 | 17.0187 | 18.8872 | 19.0582 | 0.17378 | 0.0098881 | 0.0366629 | Up-regulated |
| NM_001497    | B4GALT1        | 2683   | 19.3698 | 19.215  | 21.8882 | 21.4751 | 0.17282 | 0.0103929 | 0.0382468 | Up-regulated |
| NM_000801    | FKBP1A         | 2280   | 385.798 | 372.297 | 417.514 | 433.43  | 0.17245 | 1.35E-05  | 0.000103  | Up-regulated |
| NM_001675    | ATF4           | 468    | 73.3945 | 73.7944 | 83.2326 | 81.9701 | 0.17174 | 0.0010799 | 0.0054618 | Up-regulated |
| NM_016222    | DDX41          | 51428  | 39.8088 | 38.8376 | 44.6043 | 43.7001 | 0.17138 | 0.0077153 | 0.0297569 | Up-regulated |
| NM_001077489 | GNAS           | 2778   | 118.278 | 119.983 | 127.623 | 139.766 | 0.17121 | 0.0052092 | 0.0212674 | Up-regulated |
| NM_001242911 | ZFAND6         | 54469  | 95.4588 | 94.5838 | 108.136 | 105.106 | 0.17121 | 0.0013625 | 0.0067094 | Up-regulated |
| NM_005842    | SPRY2          | 10253  | 47.4004 | 47.0076 | 52.3544 | 53.6142 | 0.17115 | 0.0051146 | 0.0209214 | Up-regulated |
| NM_001004333 | RNASEK         | 440400 | 381.107 | 369.76  | 409.095 | 432.183 | 0.1709  | 0.0013329 | 0.0065792 | Up-regulated |
| NM_003118    | SPARC          | 6678   | 551.918 | 554.702 | 626.779 | 613.956 | 0.17044 | 4.04E-10  | 5.61E-09  | Up-regulated |
| NM_006384    | CIB1           | 10519  | 113.113 | 113.98  | 129.447 | 125.012 | 0.16989 | 0.0117141 | 0.0422703 | Up-regulated |
| NM_001731    | BTG1           | 694    | 21.6637 | 20.6273 | 23.1717 | 24.2694 | 0.16983 | 0.0118251 | 0.0426143 | Up-regulated |
| NM_002629    | PGAM1          | 5223   | 370.047 | 355.48  | 400.489 | 412.349 | 0.16962 | 8.84E-06  | 7.03E-05  | Up-regulated |
| NM_003286    | DNA) I(TOP1    | 7150   | 43.8233 | 42.3551 | 47.9728 | 48.6243 | 0.16956 | 0.0009192 | 0.0047519 | Up-regulated |
| NM_013388    | PREB           | 10113  | 54.988  | 52.3344 | 61.2888 | 58.947  | 0.16864 | 0.0090645 | 0.0340467 | Up-regulated |
| NM_001159390 | GUK1           | 2987   | 188.593 | 175.671 | 208.598 | 199.109 | 0.16813 | 0.0097342 | 0.0361568 | Up-regulated |
| NM_005082    | TRIM25         | 7706   | 30.4449 | 30.5407 | 34.606  | 33.6655 | 0.16762 | 0.0005054 | 0.0027743 | Up-regulated |
| NM_005765    | ATP6AP2        | 10159  | 62.9653 | 62.6734 | 68.9236 | 71.7001 | 0.16753 | 0.0043635 | 0.0182036 | Up-regulated |
| NM_032801    | JAM3           | 83700  | 24.3124 | 24.5418 | 27.8708 | 26.7857 | 0.16598 | 0.0129939 | 0.0461733 | Up-regulated |
| NM_006406    | PRDX4          | 10549  | 211.436 | 204.262 | 233.931 | 230.419 | 0.16581 | 0.0021714 | 0.0099805 | Up-regulated |
| NM_018083    | ZNF358         | 140467 | 54.8211 | 53.5348 | 61.233  | 59.8827 | 0.1653  | 0.0085745 | 0.0325258 | Up-regulated |
| NM_015168    | ZC3H4          | 23211  | 26.3182 | 26.5543 | 30.5017 | 28.6023 | 0.16518 | 0.0039108 | 0.0166014 | Up-regulated |
| NM_003601    | SMARCA5        | 8467   | 10.886  | 11.1513 | 12.0735 | 12.5711 | 0.16509 | 0.0137568 | 0.0484519 | Up-regulated |
| NM_004161    | RAB1A          | 5861   | 143.154 | 134.135 | 155.452 | 154.18  | 0.16427 | 0.0004234 | 0.0023742 | Up-regulated |
| NM_002812    | PSMD8          | 5714   | 201.109 | 184.755 | 215.666 | 214.812 | 0.16302 | 0.0035025 | 0.015086  | Up-regulated |
| NM_005781    | TNK2           | 10188  | 39.8777 | 42.6026 | 46.2619 | 45.784  | 0.1629  | 0.0035049 | 0.0150932 | Up-regulated |
| NM_133264    | WIPF2          | 147179 | 15.7386 | 15.7621 | 17.7959 | 17.3612 | 0.16232 | 0.01266   | 0.0452223 | Up-regulated |
| NM_024524    | ATP13A3        | 79572  | 19.1357 | 19.0968 | 20.9031 | 21.7353 | 0.16184 | 0.0026862 | 0.0119919 | Up-regulated |
| NM_002109    | HARS           | 3035   | 52.6627 | 50.9306 | 58.7091 | 56.7843 | 0.16178 | 0.0079703 | 0.03058   | Up-regulated |
| NM_001142423 | MORF4L2        | 9643   | 87.823  | 86.5685 | 96.5521 | 97.7889 | 0.16158 | 0.001274  | 0.0063195 | Up-regulated |
| NM_001428    | ENO1           | 2023   | 1894.57 | 1829.63 | 2063.39 | 2084.07 | 0.16093 | 5.18E-07  | 5.01E-06  | Up-regulated |
| NM_005742    | PDIA6          | 10130  | 286.19  | 282.85  | 315.683 | 317.453 | 0.15963 | 6.20E-08  | 6.71E-07  | Up-regulated |
| NM_006367    | CAP1           | 10487  | 93.3285 | 94.8589 | 105.323 | 104.111 | 0.1596  | 0.0001106 | 0.0007059 | Up-regulated |
| NM_030971    | SFXN3          | 81855  | 57.2812 | 54.1416 | 62.48   | 61.5654 | 0.1595  | 0.0033596 | 0.0145397 | Up-regulated |
| NM_015179    | RRP12          | 23223  | 24.3423 | 24.6904 | 27.9719 | 26.62   | 0.15922 | 0.0114283 | 0.0414739 | Up-regulated |
| NM_001330585 | CC2D1B         | 200014 | 26.2749 | 25.3747 | 28.998  | 28.4798 | 0.15891 | 0.0035063 | 0.0150956 | Up-regulated |
| NM_002824    | PTMS           | 5763   | 410.04  | 392.78  | 451.106 | 440.713 | 0.15786 | 0.0001148 | 0.0007304 | Up-regulated |
| NM_153367    | ZCCHC24        | 219654 | 30.1378 | 31.2362 | 34.768  | 33.46   | 0.15754 | 0.0047683 | 0.0196565 | Up-regulated |
| NM_031892    | SH3KBP1        | 30011  | 36.057  | 33.5937 | 38.106  | 39.2881 | 0.15677 | 0.00795   | 0.0305206 | Up-regulated |
| NM_014654    | SDC3           | 9672   | 134.656 | 133.895 | 153.328 | 144.962 | 0.15658 | 0.000109  | 0.0006964 | Up-regulated |

|              |               |        |         |         |         |         |         |           |           |                |
|--------------|---------------|--------|---------|---------|---------|---------|---------|-----------|-----------|----------------|
| NM_000521    | HEXB          | 3074   | 126.118 | 123.684 | 140.127 | 137.23  | 0.15649 | 0.0004424 | 0.0024671 | Up-regulated   |
| NM_024297    | PHF23         | 79142  | 62.1249 | 62.1516 | 68.258  | 69.7291 | 0.15585 | 0.0063033 | 0.0249765 | Up-regulated   |
| NM_004587    | RRBP1         | 6238   | 62.0768 | 65.2248 | 73.4884 | 67.7813 | 0.15473 | 0.0114757 | 0.0416144 | Up-regulated   |
| NM_004357    | lood group)(  | 977    | 229.25  | 228.264 | 258.563 | 248.732 | 0.15472 | 0.0001808 | 0.0010979 | Up-regulated   |
| NM_006009    | TUBA1A        | 7846   | 318.86  | 306.361 | 355.317 | 337.991 | 0.15468 | 0.0003745 | 0.0021235 | Up-regulated   |
| NM_002794    | PSMB2         | 5690   | 62.4244 | 61.533  | 65.6142 | 71.9259 | 0.15464 | 0.0070736 | 0.0276109 | Up-regulated   |
| NM_000941    | POR           | 5447   | 65.5833 | 68.4175 | 75.3578 | 73.2434 | 0.15418 | 0.0047562 | 0.0196153 | Up-regulated   |
| NM_00114620  | 2-N-acetylgl  | 4245   | 48.0075 | 50.8942 | 54.5608 | 55.1389 | 0.15397 | 0.0095192 | 0.0354894 | Up-regulated   |
| NM_000520    | HEXA          | 3073   | 101.957 | 97.8818 | 109.08  | 112.326 | 0.15322 | 0.0008023 | 0.0042036 | Up-regulated   |
| NM_007065    | CDC37         | 11140  | 226.658 | 230.597 | 257.067 | 249.408 | 0.15321 | 0.0001028 | 0.0006609 | Up-regulated   |
| NM_002972    | SBF1          | 6305   | 37.5668 | 38.3239 | 43.5258 | 40.5745 | 0.15293 | 0.0028182 | 0.0124965 | Up-regulated   |
| NM_015379    | BRI3          | 25798  | 416.282 | 411.458 | 464.984 | 450.608 | 0.1529  | 0.0006022 | 0.0032531 | Up-regulated   |
| NM_014445    | SERP1         | 27230  | 61.6678 | 62.5744 | 67.446  | 70.1762 | 0.1526  | 0.0019213 | 0.0089821 | Up-regulated   |
| NM_014742    | TM9SF4        | 9777   | 36.4068 | 37.7844 | 41.3003 | 40.8895 | 0.15235 | 0.0046701 | 0.0192974 | Up-regulated   |
| NM_001892    | CSNK1A1       | 1452   | 42.4278 | 41.6432 | 46.9151 | 46.1637 | 0.15169 | 0.0124111 | 0.0444745 | Up-regulated   |
| NM_018998    | FBXW5         | 54461  | 106.838 | 102.542 | 119.88  | 111.8   | 0.151   | 0.0071016 | 0.0276992 | Up-regulated   |
| NM_005928    | MFG8          | 4240   | 172.96  | 174.8   | 197.722 | 186.938 | 0.15073 | 0.000993  | 0.00508   | Up-regulated   |
| NM_001183    | ATP6AP1       | 537    | 112.907 | 116.64  | 130.596 | 123.304 | 0.15055 | 0.0043669 | 0.0182136 | Up-regulated   |
| NM_002588    | PCDHGC3       | 5098   | 52.197  | 50.4269 | 58.7286 | 54.7594 | 0.14985 | 0.006399  | 0.0253034 | Up-regulated   |
| NM_012425    | RSU1          | 6251   | 42.3038 | 40.0942 | 45.4085 | 45.6916 | 0.14959 | 0.0066706 | 0.0262308 | Up-regulated   |
| NM_021626    | SCPEP1        | 59342  | 85.6164 | 85.1878 | 93.1611 | 95.5535 | 0.14911 | 0.0036389 | 0.0156137 | Up-regulated   |
| NM_201432    | GAS7          | 8522   | 48.4659 | 48.9416 | 54.7526 | 52.8898 | 0.14901 | 8.88E-05  | 0.0005772 | Up-regulated   |
| NM_003463    | PTP4A1        | 7803   | 34.3102 | 33.3426 | 37.1706 | 37.5905 | 0.14893 | 0.0021988 | 0.0100845 | Up-regulated   |
| NM_002809    | PSMD3         | 5709   | 220.845 | 215.079 | 243.923 | 237.445 | 0.14855 | 6.25E-05  | 0.0004192 | Up-regulated   |
| NM_000372    | TYR           | 7299   | 417.458 | 421.569 | 452.606 | 473.521 | 0.14804 | 5.03E-05  | 0.0003448 | Up-regulated   |
| NM_001098520 | HTATIP2       | 10553  | 106.925 | 111.692 | 118.429 | 122.654 | 0.14669 | 0.0116801 | 0.0421636 | Up-regulated   |
| NM_021643    | TRIB2         | 28951  | 60.4709 | 59.9328 | 65.7853 | 66.9445 | 0.14566 | 0.000278  | 0.0016241 | Up-regulated   |
| NM_001658    | ARF1          | 375    | 228.338 | 215.138 | 243.739 | 244.293 | 0.14353 | 0.0011861 | 0.0059326 | Up-regulated   |
| NM_004350    | RUNX3         | 864    | 71.1385 | 71.7848 | 78.7824 | 78.4183 | 0.14257 | 0.0001413 | 0.0008834 | Up-regulated   |
| NM_003296    | MRFAP1        | 93621  | 100.351 | 101.392 | 108.965 | 112.84  | 0.14224 | 0.0025147 | 0.0113484 | Up-regulated   |
| NM_003097    | SNRPN         | 6638   | 187.643 | 179.691 | 204.785 | 198.993 | 0.14219 | 0.0024071 | 0.0109166 | Up-regulated   |
| NM_018462    | BRK1          | 55845  | 236.363 | 223.58  | 260.437 | 245.085 | 0.14201 | 0.0130555 | 0.0463499 | Up-regulated   |
| NM_016224    | SNX9          | 51429  | 64.6171 | 64.8195 | 72.103  | 70.175  | 0.1417  | 0.0005121 | 0.0028075 | Up-regulated   |
| NM_004371    | COPA          | 1314   | 66.422  | 66.6711 | 73.7087 | 72.5371 | 0.14108 | 5.81E-05  | 0.0003927 | Up-regulated   |
| NM_003128    | SPTBN1        | 6711   | 82.3011 | 86.7596 | 93.0597 | 92.6058 | 0.14011 | 0.000315  | 0.0018171 | Up-regulated   |
| NM_001143963 | LICAM         | 3897   | 108.858 | 115.26  | 126.795 | 119.33  | 0.13995 | 0.0058089 | 0.0232734 | Up-regulated   |
| NM_002797    | PSMB5         | 5693   | 141.168 | 136.289 | 151.943 | 152.293 | 0.13875 | 0.0084472 | 0.0321389 | Up-regulated   |
| NM_000942    | PIIB          | 5479   | 764.519 | 760.441 | 838.481 | 832.159 | 0.13832 | 2.68E-06  | 2.33E-05  | Up-regulated   |
| NM_013241    | FHOD1         | 29109  | 67.6373 | 72.5461 | 78.3508 | 75.2865 | 0.13698 | 0.0131434 | 0.0466352 | Up-regulated   |
| NM_198589    | lood group)(  | 682    | 716.126 | 710.022 | 805.934 | 755.752 | 0.13663 | 0.0010599 | 0.0053744 | Up-regulated   |
| NM_174983    | MFSD12        | 126321 | 985.397 | 987.747 | 1113.3  | 1045.81 | 0.13544 | 0.0009099 | 0.0047115 | Up-regulated   |
| NM_013336    | SEC61A1       | 29927  | 115.749 | 118.111 | 130.097 | 125.86  | 0.13543 | 0.0004438 | 0.0024729 | Up-regulated   |
| NM_002577    | ivated kinase | 5062   | 21.5258 | 22.1038 | 23.9908 | 23.749  | 0.13484 | 0.012854  | 0.0457701 | Up-regulated   |
| NM_002074    | GNB1          | 2782   | 160.93  | 161.833 | 176.212 | 176.454 | 0.13321 | 1.87E-05  | 0.0001392 | Up-regulated   |
| NM_006825    | CKAP4         | 10970  | 63.2773 | 65.6    | 70.0934 | 70.6522 | 0.13223 | 0.0065629 | 0.0258603 | Up-regulated   |
| NM_005801    | EIF1          | 10209  | 391.924 | 387.368 | 423.465 | 425.669 | 0.13003 | 8.43E-05  | 0.00055   | Up-regulated   |
| NM_005506    | SCARB2        | 950    | 114.98  | 116.835 | 124.705 | 127.817 | 0.12869 | 0.0001355 | 0.0008497 | Up-regulated   |
| NM_016128    | COPG1         | 22820  | 84.6054 | 82.3209 | 89.4158 | 92.1538 | 0.12662 | 0.0043678 | 0.0182136 | Up-regulated   |
| NM_003170    | SUPT6H        | 6830   | 48.9716 | 50.4442 | 55.2298 | 52.9308 | 0.12652 | 0.0046102 | 0.0191038 | Up-regulated   |
| NM_000041    | APOE          | 348    | 548.007 | 536.751 | 597.75  | 580.165 | 0.12521 | 0.000377  | 0.0021352 | Up-regulated   |
| NM_004911    | PDIA4         | 9601   | 158.482 | 156.707 | 171.192 | 171.119 | 0.12453 | 0.0001232 | 0.0007784 | Up-regulated   |
| NM_003870    | IQGAP1        | 8826   | 59.8167 | 59.5873 | 63.3627 | 66.3249 | 0.12436 | 0.0015827 | 0.0076075 | Up-regulated   |
| NM_002808    | PSMD2         | 5708   | 165.311 | 162.242 | 175.183 | 180.311 | 0.12355 | 0.0005021 | 0.0027609 | Up-regulated   |
| NM_013286    | RBM15B        | 29890  | 24.9491 | 25.2314 | 27.3057 | 27.1436 | 0.12269 | 0.0104928 | 0.0385626 | Up-regulated   |
| NM_002211    | ITGB1         | 3688   | 89.365  | 90.0195 | 97.6936 | 96.7328 | 0.12144 | 0.0007529 | 0.0039803 | Up-regulated   |
| NM_003012    | SFRP1         | 6422   | 107.431 | 107.752 | 115.982 | 116.752 | 0.11855 | 0.0001773 | 0.0010801 | Up-regulated   |
| NM_001909    | CTSD          | 1509   | 1572.17 | 1568.81 | 1743.63 | 1632.93 | 0.10991 | 0.0097021 | 0.0360518 | Up-regulated   |
| NM_012248    | SEPHS2        | 22928  | 113.546 | 110.919 | 121.482 | 119.543 | 0.10811 | 0.0108604 | 0.0397149 | Up-regulated   |
| NM_003133    | CNP           | 1267   | 69.5572 | 68.7226 | 73.899  | 74.2421 | 0.10472 | 0.0028163 | 0.0124938 | Up-regulated   |
| NM_001746    | CANX          | 821    | 187.471 | 185.473 | 195.888 | 199.167 | 0.08851 | 0.0016502 | 0.0078765 | Up-regulated   |
| NM_005561    | LAMP1         | 3916   | 234.399 | 231.89  | 246.508 | 244.265 | 0.07952 | 0.0097006 | 0.0360518 | Up-regulated   |
| NM_005754    | G3BP1         | 10146  | 183.963 | 186.904 | 171.8   | 175.93  | -0.087  | 0.0126522 | 0.045203  | Down-regulated |
| NM_002819    | PTBP1         | 5725   | 115.907 | 115.325 | 107.282 | 108.485 | -0.094  | 0.0086112 | 0.0326315 | Down-regulated |
| NM_001001391 | lood group)   | 960    | 111.11  | 114.451 | 105.973 | 104.29  | -0.0955 | 0.0084229 | 0.0320526 | Down-regulated |
| NM_203504    | G3BP2         | 9908   | 68.8952 | 68.6372 | 62.5294 | 64.0891 | -0.1133 | 0.0050657 | 0.0207365 | Down-regulated |
| NM_015276    | USP22         | 23326  | 113.038 | 116.071 | 104.199 | 106.322 | -0.1163 | 0.0008426 | 0.0043978 | Down-regulated |
| NM_153649    | TPM3          | 7170   | 176.162 | 170.734 | 162.02  | 156.625 | -0.1165 | 0.0024762 | 0.0112001 | Down-regulated |
| NM_000986    | RPL24         | 6152   | 2555.17 | 2382.89 | 2277.31 | 2225.37 | -0.123  | 0.0086442 | 0.0327196 | Down-regulated |
| NM_014292    | CBX6          | 23466  | 52.7464 | 55.1472 | 49.4332 | 49.2264 | -0.1232 | 0.0045357 | 0.0188275 | Down-regulated |
| NM_018243    | 11-Sep        | 55752  | 34.5726 | 34.7868 | 31.6744 | 31.536  | -0.128  | 0.0059337 | 0.0237087 | Down-regulated |
| NM_004134    | member 9(F    | 3313   | 179.237 | 176.6   | 161.098 | 162.74  | -0.1301 | 2.76E-05  | 0.0001994 | Down-regulated |
| NM_025250    | TTYH3         | 80727  | 77.3079 | 79.4205 | 73.0984 | 69.3955 | -0.1313 | 0.0041412 | 0.0174119 | Down-regulated |
| NM_015027    | PDXDC1        | 23042  | 34.6038 | 34.1219 | 31.2305 | 31.2126 | -0.1322 | 0.0095827 | 0.0356773 | Down-regulated |
| NM_001923    | DDB1          | 1642   | 54.6425 | 55.4199 | 50.4872 | 49.4644 | -0.1329 | 0.0027087 | 0.0120726 | Down-regulated |
| NM_015411    | SUMF2         | 25870  | 84.9176 | 85.4303 | 78.4189 | 76.2147 | -0.1331 | 0.0111521 | 0.0406339 | Down-regulated |
| NM_006513    | SARS          | 6301   | 106.674 | 105.117 | 96.9873 | 95.0996 | -0.134  | 0.0058495 | 0.0234261 | Down-regulated |
| NM_001042465 | PSAP          | 5660   | 108.002 | 115.154 | 100.127 | 102.302 | -0.1344 | 0.0079621 | 0.0305546 | Down-regulated |
| NM_005051    | QARS          | 5859   | 93.3849 | 91.5378 | 82.6918 | 84.9434 | -0.1354 | 0.0022933 | 0.0104528 | Down-regulated |
| NM_005334    | HCFC1         | 3054   | 23.9091 | 24.5937 | 22.3029 | 21.6452 | -0.136  | 0.0058785 | 0.0235227 | Down-regulated |
| NM_004145    | MYO9B         | 4650   | 53.8068 | 56.5482 | 50.1137 | 49.7599 | -0.138  | 0.0011763 | 0.0058881 | Down-regulated |
| NM_013291    | CPSF1         | 29894  | 50.8234 | 52.1722 | 48.0783 | 44.9377 | -0.1409 | 0.0110305 | 0.0402366 | Down-regulated |
| NM_001540    | member 1(H    | 3315   | 1585.07 | 1499.25 | 1412.15 | 1370.03 | -0.141  | 0.0006715 | 0.0035868 | Down-regulated |
| NM_152713    | STT3A         | 3703   | 35.9358 | 37.2567 | 33.2228 | 32.8222 | -0.1419 | 0.0100507 | 0.0371808 | Down-regulated |
| NM_001207    | BTF3          | 689    | 423.284 | 405.891 | 363.741 | 383.746 | -0.1419 | 0.0047757 | 0.0196742 | Down-regulated |

|              |                 |        |         |         |         |         |         |           |           |                |
|--------------|-----------------|--------|---------|---------|---------|---------|---------|-----------|-----------|----------------|
| NM_000981    | RPL19           | 6143   | 2664.32 | 2516.21 | 2302.02 | 2365.3  | -0.142  | 0.0007897 | 0.0041535 | Down-regulated |
| NM_004583    | RAB5C           | 5878   | 221.626 | 207.717 | 194.014 | 192.988 | -0.1431 | 0.0032999 | 0.0143007 | Down-regulated |
| NM_006761    | YWHAE           | 7531   | 683.024 | 642.831 | 592.249 | 601.767 | -0.1446 | 0.0004091 | 0.0023017 | Down-regulated |
| NM_007107    | SSR3            | 6747   | 61.0039 | 60.9014 | 53.91   | 55.8322 | -0.1455 | 0.0009494 | 0.004887  | Down-regulated |
| NM_021104    | RPL41           | 6171   | 9681.38 | 8809.93 | 8190.93 | 8364.57 | -0.1468 | 0.0086515 | 0.0327399 | Down-regulated |
| NM_007103    | NDUFV1          | 4723   | 107.74  | 105.708 | 97.0909 | 94.6895 | -0.147  | 0.00627   | 0.0248756 | Down-regulated |
| NM_007040    | HNRNPUL1        | 11100  | 50.865  | 55.0021 | 48.2195 | 46.9414 | -0.1472 | 0.0139332 | 0.0489828 | Down-regulated |
| NM_003768    | PEA15           | 8682   | 96.8585 | 89.5416 | 85.0227 | 82.4625 | -0.1474 | 0.0127103 | 0.0453512 | Down-regulated |
| NM_005717    | ARPC5           | 10092  | 112.982 | 105.31  | 97.864  | 98.2637 | -0.1477 | 0.0082212 | 0.0313984 | Down-regulated |
| NM_004309    | ARHGDI1A        | 396    | 227.594 | 226.351 | 205.871 | 201.584 | -0.1495 | 3.90E-05  | 0.0002731 | Down-regulated |
| NM_000876    | IGF2R           | 3482   | 29.6736 | 30.1997 | 27.1283 | 26.6309 | -0.1498 | 3.51E-05  | 0.0002479 | Down-regulated |
| NM_017895    | DDX27           | 55661  | 66.6283 | 65.2176 | 59.8272 | 58.4216 | -0.1505 | 0.003561  | 0.0153107 | Down-regulated |
| NM_000989    | RPL30           | 6156   | 1812.92 | 1671.41 | 1551.62 | 1563.49 | -0.151  | 0.0040276 | 0.0170367 | Down-regulated |
| NM_012323    | MAFF            | 23764  | 78.0073 | 73.882  | 69.4891 | 66.6291 | -0.1512 | 0.0095956 | 0.0357115 | Down-regulated |
| NM_000979    | RPL18           | 6141   | 1064.07 | 988.168 | 906.996 | 930.23  | -0.1517 | 0.001814  | 0.0085476 | Down-regulated |
| NM_005716    | GIPC1           | 10755  | 111.929 | 111.084 | 102.122 | 97.6884 | -0.1519 | 0.0027661 | 0.0122881 | Down-regulated |
| NM_001810    | CENPB           | 1059   | 58.916  | 57.1505 | 52.7529 | 51.2229 | -0.1521 | 0.0053982 | 0.0219407 | Down-regulated |
| NM_002293    | LAMC1           | 3915   | 48.2658 | 48.6511 | 43.3524 | 43.4574 | -0.1532 | 1.35E-05  | 0.000103  | Down-regulated |
| NM_001862    | COX5B           | 1329   | 1296.74 | 1205.8  | 1124.2  | 1105.92 | -0.1547 | 0.0044857 | 0.0186525 | Down-regulated |
| NR_036625    | VDAC1           | 7416   | 135.773 | 126.889 | 113.575 | 121.221 | -0.1548 | 0.0104572 | 0.0384388 | Down-regulated |
| NR_026712    | RPL13AP5        | 728658 | 11207.8 | 10443.1 | 9899.09 | 9422.8  | -0.155  | 0.0020372 | 0.0094571 | Down-regulated |
| NM_014014    | SNRNP200        | 23020  | 63.9745 | 65.2281 | 58.1924 | 57.3414 | -0.1555 | 9.73E-06  | 7.68E-05  | Down-regulated |
| NM_014298    | QPRT            | 23475  | 185.176 | 180.953 | 162.87  | 164.364 | -0.1558 | 1.75E-05  | 0.0001313 | Down-regulated |
| NM_001023    | RPS20           | 6224   | 1276.58 | 1204.23 | 1092.86 | 1121.27 | -0.156  | 0.0003343 | 0.0019192 | Down-regulated |
| NM_002959    | SORT1           | 6272   | 23.5902 | 24.1498 | 21.0581 | 21.5983 | -0.156  | 0.0027127 | 0.0120878 | Down-regulated |
| NM_006390    | IPO8            | 10526  | 33.2766 | 31.8702 | 28.9069 | 29.283  | -0.1563 | 0.0031276 | 0.0136219 | Down-regulated |
| NM_003769    | SRSF9           | 8683   | 198.259 | 189.864 | 178.682 | 167.487 | -0.1573 | 0.0087543 | 0.0330569 | Down-regulated |
| NM_003088    | FSCN1           | 6624   | 151.034 | 151.266 | 136.697 | 133.207 | -0.1575 | 1.87E-05  | 0.0001391 | Down-regulated |
| NM_005146    | SART1           | 9092   | 31.6345 | 31.0654 | 28.531  | 27.422  | -0.1575 | 0.0131199 | 0.0465604 | Down-regulated |
| NM_002212    | EIF6            | 3692   | 214.002 | 206.424 | 187.637 | 187.283 | -0.1579 | 0.0017284 | 0.0082072 | Down-regulated |
| NM_001177413 | RPS27A          | 6233   | 700.573 | 692.085 | 606.89  | 634.428 | -0.158  | 0.0001083 | 0.0006925 | Down-regulated |
| NM_001697    | ATP5O           | 539    | 330.749 | 305.199 | 288.448 | 277.957 | -0.1584 | 0.0133779 | 0.0473442 | Down-regulated |
| NM_198976    | NELFCD          | 51497  | 86.3201 | 84.016  | 75.3617 | 76.4623 | -0.1593 | 0.0013943 | 0.0068434 | Down-regulated |
| NM_004958    | MTOR            | 2475   | 16.5652 | 17.5532 | 15.4508 | 14.9548 | -0.1598 | 0.0090228 | 0.0339166 | Down-regulated |
| NM_133631    | ROBO1           | 6091   | 21.1103 | 21.3517 | 18.1636 | 19.6348 | -0.1615 | 0.0093013 | 0.0348198 | Down-regulated |
| NM_003339    | UBE2D2          | 7322   | 39.0494 | 37.6616 | 34.292  | 33.916  | -0.1623 | 0.0140327 | 0.0492962 | Down-regulated |
| NM_001747    | CAPG            | 822    | 311.319 | 316.15  | 290.838 | 266.955 | -0.1627 | 0.0022162 | 0.0101475 | Down-regulated |
| NM_052932    | TMEM123         | 114908 | 66.1883 | 65.2712 | 57.7225 | 59.2021 | -0.1628 | 0.0003125 | 0.001805  | Down-regulated |
| NM_016045    | PRELID3B        | 51012  | 38.6342 | 38.6807 | 34.3024 | 34.3961 | -0.1637 | 0.0126332 | 0.0451522 | Down-regulated |
| NM_003754    | EIF3F           | 8665   | 131.248 | 138.086 | 122.032 | 117.073 | -0.164  | 0.0085626 | 0.0325002 | Down-regulated |
| NM_021130    | PPIA            | 5478   | 488.228 | 456.073 | 412.864 | 425.473 | -0.1652 | 0.0002452 | 0.0014469 | Down-regulated |
| NM_001628    | AKR1B1          | 231    | 192.899 | 179.848 | 164.616 | 166.13  | -0.1653 | 0.0024892 | 0.0112517 | Down-regulated |
| NM_001695    | ATP6V1C1        | 528    | 25.438  | 23.6135 | 21.754  | 21.7736 | -0.1653 | 0.0095494 | 0.0355813 | Down-regulated |
| NM_004356    | CD81            | 975    | 346.834 | 351.113 | 301.935 | 317.431 | -0.1656 | 7.94E-05  | 0.0005219 | Down-regulated |
| NM_178167    | ZNF598          | 90850  | 36.9727 | 37.0733 | 32.5071 | 33.1392 | -0.1669 | 0.0043285 | 0.0180893 | Down-regulated |
| NM_021029    | RPL36A          | 6173   | 761.576 | 715.391 | 634.516 | 673.364 | -0.1671 | 0.0017275 | 0.0082067 | Down-regulated |
| NM_016139    | CHCHD2          | 51142  | 561.337 | 511.24  | 478.923 | 470.978 | -0.1672 | 0.0033805 | 0.0146134 | Down-regulated |
| NM_002386    | MC1R            | 4157   | 88.4654 | 87.8088 | 80.8637 | 75.2048 | -0.1688 | 0.0016114 | 0.0077242 | Down-regulated |
| NM_007359    | CASC3           | 22794  | 24.3073 | 24.1584 | 21.4038 | 21.4991 | -0.169  | 0.0077656 | 0.029921  | Down-regulated |
| NM_003483    | HMGA2           | 8091   | 44.2838 | 43.302  | 38.5412 | 38.9826 | -0.1696 | 0.000628  | 0.0033781 | Down-regulated |
| NM_000967    | RPL3            | 6122   | 1352.83 | 1287.7  | 1162.49 | 1170.55 | -0.1717 | 2.09E-06  | 1.85E-05  | Down-regulated |
| NM_001002    | RPLP0           | 6175   | 677.3   | 640.777 | 579.985 | 584.293 | -0.1719 | 2.53E-05  | 0.0001844 | Down-regulated |
| NM_012105    | BACE2           | 25825  | 42.9614 | 42.2556 | 37.252  | 38.0726 | -0.1721 | 3.37E-06  | 2.88E-05  | Down-regulated |
| NM_016462    | TMEM14C         | 51522  | 100.643 | 103.295 | 90.3827 | 89.5432 | -0.1724 | 0.0091474 | 0.0343243 | Down-regulated |
| NM_006109    | PRMT5           | 10419  | 49.647  | 50.3352 | 45.2236 | 43.0651 | -0.1724 | 0.0061356 | 0.0244031 | Down-regulated |
| NM_016019    | LUC7L2          | 51631  | 68.7873 | 68.4806 | 60.0489 | 61.2159 | -0.1725 | 0.0004945 | 0.0027253 | Down-regulated |
| NM_018060    | IARS2           | 55699  | 50.4539 | 52.368  | 43.7877 | 46.989  | -0.1728 | 0.0047894 | 0.0197263 | Down-regulated |
| NM_004501    | HNRNPU          | 3192   | 35.1899 | 31.6212 | 29.696  | 29.2763 | -0.1731 | 0.0085248 | 0.0323826 | Down-regulated |
| NM_001092    | ABR             | 29     | 29.3165 | 31.1085 | 25.8615 | 27.4391 | -0.1737 | 0.007855  | 0.0301984 | Down-regulated |
| NM_002634    | PHB             | 5245   | 197.142 | 191.145 | 167.046 | 175.544 | -0.1739 | 0.0002025 | 0.0012188 | Down-regulated |
| NM_198241    | EIF4G1          | 1981   | 94.8874 | 100.125 | 89.4688 | 82.5618 | -0.1744 | 0.0017761 | 0.0083918 | Down-regulated |
| NM_199141    | CARM1           | 10498  | 58.0515 | 60.4996 | 53.3029 | 51.086  | -0.1767 | 0.0020685 | 0.0095815 | Down-regulated |
| NM_016142    | HSD17B12        | 51144  | 66.7202 | 65.8119 | 56.5644 | 60.1183 | -0.1767 | 0.0025591 | 0.0115134 | Down-regulated |
| NM_005850    | SFB4            | 10262  | 47.8688 | 46.5083 | 41.6751 | 41.3935 | -0.1769 | 0.0114498 | 0.0415362 | Down-regulated |
| NM_018127    | ELAC2           | 60528  | 27.0001 | 27.6869 | 24.4549 | 23.6899 | -0.177  | 0.0071319 | 0.0277987 | Down-regulated |
| NM_031263    | HNRNPK          | 3190   | 66.2509 | 69.5474 | 61.8744 | 57.6417 | -0.1773 | 0.0043996 | 0.0183295 | Down-regulated |
| NM_001009    | RPS5            | 6193   | 1144.69 | 1076.79 | 972.813 | 979.774 | -0.1775 | 6.37E-05  | 0.0004265 | Down-regulated |
| NM_000183    | otein), beta st | 3032   | 77.1511 | 77.1353 | 67.9249 | 67.8607 | -0.1776 | 0.0005876 | 0.0031805 | Down-regulated |
| NM_016057    | COPZ1           | 22818  | 116.312 | 109.63  | 97.6025 | 101.141 | -0.1779 | 0.0016144 | 0.0077357 | Down-regulated |
| NM_000714    | TSPO            | 706    | 239.981 | 249.146 | 209.727 | 219.995 | -0.1782 | 0.0027233 | 0.0121293 | Down-regulated |
| NM_018206    | VPS35           | 55737  | 27.5793 | 28.6157 | 24.1023 | 25.3281 | -0.1782 | 0.0037345 | 0.0159598 | Down-regulated |
| NM_016016    | SLC25A39        | 51629  | 96.2289 | 98.611  | 83.4143 | 87.8771 | -0.1786 | 0.0034771 | 0.0149867 | Down-regulated |
| NM_001190836 | DCTN1           | 1639   | 46.4656 | 46.7697 | 42.224  | 39.7849 | -0.1786 | 0.0009217 | 0.004761  | Down-regulated |
| NM_001253383 | RPL15           | 6138   | 312.101 | 277.564 | 253.548 | 264.702 | -0.1789 | 0.0053053 | 0.0216043 | Down-regulated |
| NM_000980    | RPL18A          | 6142   | 7452.78 | 6872.76 | 6292.83 | 6275.24 | -0.1796 | 0.0002075 | 0.0012459 | Down-regulated |
| NM_002948    | RPL15           | 6138   | 166.056 | 159.898 | 141.984 | 144.536 | -0.1796 | 1.36E-05  | 0.0001041 | Down-regulated |
| NM_016070    | MRPS23          | 51649  | 62.2925 | 62.4912 | 54.6239 | 54.8935 | -0.18   | 0.0115472 | 0.0417864 | Down-regulated |
| NM_003801    | GPAA1           | 8733   | 81.4682 | 80.2644 | 73.6408 | 68.3609 | -0.1805 | 0.0040015 | 0.0169412 | Down-regulated |
| NM_002537    | OAZ2            | 4947   | 49.6237 | 47.968  | 43.6276 | 42.0042 | -0.181  | 0.0124785 | 0.044666  | Down-regulated |
| NM_001961    | EEF2            | 1938   | 892.699 | 864.981 | 775.113 | 768.816 | -0.1811 | 1.47E-09  | 1.91E-08  | Down-regulated |
| NM_003592    | CUL1            | 8454   | 44.3449 | 42.3781 | 36.7721 | 39.3367 | -0.1811 | 0.006365  | 0.0251791 | Down-regulated |
| NM_020131    | UBQLN4          | 56893  | 28.5859 | 27.441  | 24.5667 | 24.6039 | -0.1812 | 0.0064429 | 0.0254559 | Down-regulated |
| NM_016304    | RSL24D1         | 51187  | 112.151 | 107.78  | 97.4041 | 95.5022 | -0.1817 | 0.0017655 | 0.0083603 | Down-regulated |
| NM_014739    | BCLAF1          | 9774   | 10.5055 | 10.8063 | 9.37792 | 9.31505 | -0.1821 | 0.0126928 | 0.0453113 | Down-regulated |

|              |               |        |         |         |         |         |         |           |           |                |
|--------------|---------------|--------|---------|---------|---------|---------|---------|-----------|-----------|----------------|
| NM_002444    | MSN           | 4478   | 168.947 | 168.059 | 144.795 | 150.928 | -0.1825 | 4.01E-07  | 3.93E-06  | Down-regulated |
| NM_006016    | CD164         | 8763   | 83.9185 | 88.2478 | 72.505  | 78.4862 | -0.1826 | 0.0021568 | 0.0099257 | Down-regulated |
| NM_033504    | TMEM54        | 113452 | 113.792 | 109.602 | 100.968 | 94.6457 | -0.183  | 0.0127757 | 0.0455598 | Down-regulated |
| NM_000903    | dehydrogen    | 1728   | 175.398 | 174.52  | 149.61  | 157.222 | -0.1832 | 1.03E-05  | 8.11E-05  | Down-regulated |
| NM_023080    | C8orf33       | 65265  | 52.005  | 50.488  | 44.8356 | 45.0068 | -0.1835 | 0.0016445 | 0.0078554 | Down-regulated |
| NM_020383    | XPNPEP1       | 7511   | 41.797  | 43.2214 | 38.3896 | 36.0924 | -0.1837 | 0.0096986 | 0.0360518 | Down-regulated |
| NM_006612    | KIF1C         | 10749  | 43.8393 | 45.1004 | 40.3353 | 37.5789 | -0.1846 | 0.0003668 | 0.0020853 | Down-regulated |
| NM_001098    | ACO2          | 50     | 64.009  | 64.3587 | 57.5794 | 54.8056 | -0.1847 | 0.0008041 | 0.0042114 | Down-regulated |
| NM_006247    | PPP5C         | 5536   | 48.9967 | 49.6496 | 42.6179 | 43.7324 | -0.185  | 0.0041231 | 0.0173487 | Down-regulated |
| NM_016320    | NUP98         | 4928   | 17.8595 | 18.4623 | 15.9299 | 15.8624 | -0.1857 | 0.0015912 | 0.0076395 | Down-regulated |
| NM_005917    | MDH1          | 4190   | 141.813 | 141.742 | 118.7   | 129.23  | -0.186  | 0.0020886 | 0.0096604 | Down-regulated |
| NM_006412    | AGPAT2        | 10555  | 59.1105 | 58.6165 | 50.3859 | 52.5185 | -0.186  | 0.0121765 | 0.0437489 | Down-regulated |
| NM_153712    | TTL           | 150465 | 26.1795 | 26.1836 | 22.3627 | 23.4468 | -0.1863 | 0.0016146 | 0.0077357 | Down-regulated |
| NM_012264    | TMEM184B      | 25829  | 54.9861 | 55.4975 | 48.9384 | 47.6982 | -0.1869 | 0.0001179 | 0.0007479 | Down-regulated |
| NM_004492    | GTF2A2        | 2958   | 58.9083 | 56.4181 | 49.5799 | 51.1944 | -0.1871 | 0.013312  | 0.0471283 | Down-regulated |
| NM_014366    | GNL3          | 26354  | 93.789  | 91.1517 | 77.8746 | 83.6755 | -0.1874 | 0.0020883 | 0.0096604 | Down-regulated |
| NM_003626    | PPF1A1        | 8500   | 32.7515 | 33.381  | 28.6745 | 29.1206 | -0.1882 | 0.0001792 | 0.00109   | Down-regulated |
| NM_031902    | MRPS5         | 64969  | 29.6508 | 27.319  | 25.1298 | 24.6057 | -0.1886 | 0.0122403 | 0.0439532 | Down-regulated |
| NM_014501    | UBE2S         | 27338  | 309.101 | 293.792 | 264.585 | 261.658 | -0.189  | 5.15E-05  | 0.0003522 | Down-regulated |
| NM_018198    | member C11(I  | 55735  | 35.7949 | 35.7712 | 32.4128 | 30.0216 | -0.189  | 0.0063614 | 0.0251741 | Down-regulated |
| NM_000993    | RPL31         | 6160   | 3103.32 | 2941.36 | 2617.49 | 2638.8  | -0.1901 | 7.06E-06  | 5.73E-05  | Down-regulated |
| NM_001024    | RPS21         | 6227   | 5850.92 | 5456.74 | 5039.77 | 4769.09 | -0.1901 | 0.0002542 | 0.0014966 | Down-regulated |
| NM_017590    | ZC3H7B        | 23264  | 31.4635 | 32.6087 | 29.3561 | 26.4687 | -0.1918 | 0.0057472 | 0.0230744 | Down-regulated |
| NM_015360    | SKIV2L2       | 23517  | 19.7743 | 19.0002 | 16.7184 | 17.0564 | -0.1919 | 0.0091329 | 0.0342833 | Down-regulated |
| NM_005617    | RPS14         | 6208   | 2418.75 | 2240.7  | 1988.36 | 2059.94 | -0.1922 | 0.0002255 | 0.0013407 | Down-regulated |
| NM_022765    | MICAL1        | 64780  | 57.9332 | 58.0903 | 51.8406 | 49.1829 | -0.1931 | 0.0001966 | 0.001187  | Down-regulated |
| NM_005184    | CALM3         | 808    | 225.858 | 224.592 | 199.592 | 192.636 | -0.1933 | 1.44E-07  | 1.50E-06  | Down-regulated |
| NM_002512    | NME2          | 4831   | 1165.91 | 1088.16 | 953.431 | 1005.04 | -0.1942 | 0.0001845 | 0.0011175 | Down-regulated |
| NM_015382    | HECTD1        | 25831  | 7.78044 | 8.02855 | 6.72421 | 7.01467 | -0.1947 | 0.0121797 | 0.0437523 | Down-regulated |
| NM_004252    | SLC9A3R1      | 9368   | 43.377  | 42.4099 | 37.5244 | 36.9923 | -0.1947 | 0.007481  | 0.0289878 | Down-regulated |
| NM_001144072 | UBAC2         | 337867 | 26.4016 | 25.7886 | 22.6369 | 22.7    | -0.1953 | 0.0135486 | 0.0478421 | Down-regulated |
| NM_001028    | RPS25         | 6230   | 2199.45 | 2017.09 | 1775.39 | 1873.4  | -0.1958 | 0.0014541 | 0.0070891 | Down-regulated |
| NM_001398    | ECH1          | 1891   | 158.252 | 150.796 | 134.973 | 133.429 | -0.1959 | 0.0004753 | 0.0026344 | Down-regulated |
| NM_005316    | GTF2H1        | 2965   | 25.429  | 23.8497 | 21.5188 | 21.261  | -0.196  | 0.0114197 | 0.0414505 | Down-regulated |
| NM_032271    | TRAF7         | 84231  | 42.1728 | 40.8808 | 36.3505 | 35.8076 | -0.1961 | 0.0003639 | 0.002071  | Down-regulated |
| NM_032353    | VPS25         | 84313  | 185.543 | 175.342 | 152.629 | 160.401 | -0.1969 | 0.0017119 | 0.0081449 | Down-regulated |
| NM_004227    | CYTH3         | 9265   | 36.7873 | 36.0363 | 32.9431 | 30.2607 | -0.1972 | 0.0024384 | 0.0110458 | Down-regulated |
| NM_004046    | ATP5A1        | 498    | 264.533 | 251.914 | 226.835 | 221.245 | -0.1982 | 3.40E-06  | 2.90E-05  | Down-regulated |
| NM_005720    | ARPC1B        | 10095  | 760.227 | 732.745 | 652.877 | 642.172 | -0.1985 | 4.49E-09  | 5.56E-08  | Down-regulated |
| NM_006924    | SRSF1         | 6426   | 47.2439 | 45.3996 | 40.2254 | 40.0921 | -0.1998 | 1.19E-05  | 9.21E-05  | Down-regulated |
| NM_004461    | FARSA         | 2193   | 118.102 | 116.931 | 102.425 | 101.197 | -0.1998 | 2.37E-05  | 0.0001734 | Down-regulated |
| NM_007363    | NONO          | 4841   | 390.275 | 378.219 | 336.226 | 329.992 | -0.1999 | 4.84E-10  | 6.65E-09  | Down-regulated |
| NM_016404    | evisiae)(TRM  | 51504  | 150.922 | 137.154 | 124.264 | 125.073 | -0.2002 | 0.0034113 | 0.0147365 | Down-regulated |
| NM_003341    | UBE2E1        | 7324   | 80.0122 | 75.932  | 68.5049 | 66.5177 | -0.2004 | 0.0014213 | 0.0069518 | Down-regulated |
| NM_005610    | RBBP4         | 5928   | 11.7737 | 11.1053 | 9.64258 | 10.159  | -0.2007 | 0.0072123 | 0.0280834 | Down-regulated |
| NM_012138    | AATF          | 26574  | 49.9093 | 49.3608 | 44.5559 | 41.3427 | -0.201  | 0.0059075 | 0.023624  | Down-regulated |
| NM_002410    | 6-N-acetyl-gl | 4249   | 29.0735 | 31.2318 | 26.5858 | 25.6295 | -0.2012 | 0.0004683 | 0.0026003 | Down-regulated |
| NM_006295    | VARS          | 7407   | 72.5618 | 70.584  | 62.6307 | 61.2798 | -0.2021 | 1.56E-06  | 1.41E-05  | Down-regulated |
| NM_138769    | RHOT2         | 89941  | 44.495  | 45.7991 | 39.0275 | 39.0626 | -0.2021 | 0.0013592 | 0.0066953 | Down-regulated |
| NM_001415    | EIF2S3        | 1968   | 66.8458 | 66.9958 | 57.9657 | 57.8504 | -0.2023 | 4.23E-06  | 3.57E-05  | Down-regulated |
| NM_014402    | UQCRCQ        | 27089  | 129.074 | 120.957 | 101.768 | 114.243 | -0.2024 | 0.0093429 | 0.0349482 | Down-regulated |
| NM_000992    | RPL29         | 6159   | 2215.61 | 1998.63 | 1805.01 | 1831.97 | -0.203  | 0.0003537 | 0.002018  | Down-regulated |
| NM_014874    | MFN2          | 9927   | 33.8715 | 37.8884 | 31.5833 | 30.3972 | -0.2038 | 0.0066147 | 0.0260484 | Down-regulated |
| NM_001003703 | ATP5J         | 522    | 80.211  | 78.0969 | 69.1205 | 67.3494 | -0.2056 | 0.0039183 | 0.0166225 | Down-regulated |
| NM_005548    | KARS          | 3735   | 70.5864 | 67.5509 | 62.7658 | 56.2755 | -0.2059 | 0.0084029 | 0.0319955 | Down-regulated |
| NM_013341    | OLA1          | 29789  | 17.7455 | 16.7389 | 14.8163 | 14.913  | -0.206  | 0.0085349 | 0.0324016 | Down-regulated |
| NM_001142864 | PIEZO1        | 9780   | 25.1034 | 26.9741 | 23.0894 | 21.8339 | -0.2061 | 0.001026  | 0.0052237 | Down-regulated |
| NM_019037    | EXOSC4        | 54512  | 223.049 | 210.485 | 195.126 | 178.32  | -0.2064 | 0.0046697 | 0.0192974 | Down-regulated |
| NR_024241    | FAM86DP       | 692099 | 27.5198 | 27.8181 | 23.3453 | 24.3139 | -0.2066 | 0.0113325 | 0.0411731 | Down-regulated |
| NM_001284254 | GUCD1         | 83606  | 34.4783 | 31.63   | 29.3936 | 27.5588 | -0.207  | 0.007236  | 0.02817   | Down-regulated |
| NM_001012    | RPS8          | 6202   | 1839.97 | 1685.41 | 1495.69 | 1538.55 | -0.2071 | 0.0001043 | 0.0006697 | Down-regulated |
| NM_022551    | RPS18         | 6222   | 3492.99 | 3275.95 | 2874.7  | 2943.71 | -0.2073 | 6.84E-06  | 5.56E-05  | Down-regulated |
| NM_005697    | SCAMP2        | 10066  | 51.5566 | 51.7836 | 44.2243 | 44.8199 | -0.2074 | 0.0004358 | 0.0024346 | Down-regulated |
| NM_032620    | hondrial)(GT  | 84705  | 36.7364 | 36.391  | 29.782  | 33.191  | -0.2075 | 0.0126916 | 0.0453113 | Down-regulated |
| NM_001037283 | EIF3B         | 8662   | 55.9983 | 60.1073 | 50.4191 | 49.6438 | -0.2076 | 0.0006536 | 0.0034973 | Down-regulated |
| NM_012111    | AHSA1         | 10598  | 114.895 | 113.481 | 100.383 | 96.3824 | -0.2076 | 0.0003855 | 0.0021801 | Down-regulated |
| NM_004546    | NDUFB2        | 4708   | 1063.54 | 978.02  | 871.376 | 880.883 | -0.2077 | 0.0007943 | 0.0041707 | Down-regulated |
| NM_000978    | RPL23         | 9349   | 2106.23 | 1946.03 | 1695.85 | 1786.13 | -0.2079 | 0.0002139 | 0.001281  | Down-regulated |
| NM_006284    | TAI10         | 6881   | 182.679 | 170.578 | 157.326 | 146.424 | -0.2079 | 0.0079011 | 0.030345  | Down-regulated |
| NM_015155    | LARP4B        | 23185  | 8.33855 | 8.17901 | 7.19623 | 7.02346 | -0.2079 | 0.0064704 | 0.025547  | Down-regulated |
| NM_001040118 | ARAP1         | 116985 | 16.6824 | 15.73   | 13.9658 | 13.9267 | -0.2088 | 0.0052347 | 0.0213546 | Down-regulated |
| NM_021008    | DEAF1         | 10522  | 51.268  | 47.151  | 43.5164 | 41.1483 | -0.2094 | 0.0042098 | 0.017663  | Down-regulated |
| NM_002660    | PLCG1         | 5335   | 45.6716 | 42.228  | 37.7344 | 37.9294 | -0.2097 | 0.0002314 | 0.0013724 | Down-regulated |
| NM_014891    | PDAP1         | 11333  | 75.7071 | 76.4101 | 65.6625 | 65.2797 | -0.2098 | 9.60E-06  | 7.58E-05  | Down-regulated |
| NM_015375    | DSTYK         | 25778  | 64.08   | 61.9605 | 55.1001 | 53.4062 | -0.21   | 7.59E-08  | 8.12E-07  | Down-regulated |
| NM_021807    | EXOC4         | 60412  | 26.8619 | 27.1752 | 22.9486 | 23.5414 | -0.2102 | 0.0006756 | 0.0036027 | Down-regulated |
| NM_001085365 | MZT2A         | 653784 | 179.614 | 171.801 | 149.953 | 151.599 | -0.2104 | 0.0062543 | 0.0248183 | Down-regulated |
| NM_001833    | CLTA          | 1211   | 139.307 | 132.766 | 117.146 | 116.584 | -0.2105 | 0.0006721 | 0.0035891 | Down-regulated |
| NM_004990    | MARS          | 4141   | 79.6486 | 78.8715 | 70.6285 | 65.7036 | -0.2106 | 0.0001661 | 0.00102   | Down-regulated |
| NM_003575    | ZNF282        | 8427   | 20.3964 | 21.6796 | 18.2802 | 17.8434 | -0.2116 | 0.0076634 | 0.0296048 | Down-regulated |
| NM_144723    | ZMAT2         | 153527 | 54.7572 | 51.8089 | 46.3141 | 45.1367 | -0.2118 | 0.0069176 | 0.0270849 | Down-regulated |
| NM_001003713 | ATP5J2        | 9551   | 734.191 | 667.739 | 573.427 | 625.386 | -0.2118 | 0.0099216 | 0.0367672 | Down-regulated |
| NM_001358    | DHX15         | 1665   | 54.5861 | 53.8278 | 45.6542 | 47.496  | -0.2122 | 0.0001158 | 0.0007359 | Down-regulated |
| NM_001154    | ANXA5         | 308    | 686.264 | 654.647 | 566.471 | 585.42  | -0.2123 | 9.15E-08  | 9.71E-07  | Down-regulated |

|              |                |        |         |         |         |         |         |           |           |                |
|--------------|----------------|--------|---------|---------|---------|---------|---------|-----------|-----------|----------------|
| NM_001079675 | ETV4           | 2118   | 100.716 | 104.975 | 88.3786 | 88.2842 | -0.2126 | 9.85E-06  | 7.77E-05  | Down-regulated |
| NM_006360    | EIF3M          | 10480  | 100.763 | 95.3572 | 86.2165 | 82.1458 | -0.2127 | 0.0006998 | 0.0037213 | Down-regulated |
| NM_015103    | PLXND1         | 23129  | 14.9612 | 16.0005 | 13.7349 | 12.841  | -0.2128 | 0.0049678 | 0.0203735 | Down-regulated |
| NM_006824    | EBNA1BP2       | 10969  | 103.581 | 97.4851 | 87.6588 | 84.8602 | -0.2129 | 0.0014944 | 0.0072434 | Down-regulated |
| NM_001533    | HNRNPL         | 3191   | 92.0992 | 93.7146 | 82.4902 | 77.0229 | -0.213  | 0.0002857 | 0.0016623 | Down-regulated |
| NM_020151    | STARD7         | 56910  | 73.4046 | 71.3673 | 60.0811 | 64.1906 | -0.2134 | 8.58E-05  | 0.0005593 | Down-regulated |
| NM_004092    | ECHS1          | 1892   | 167.533 | 164.336 | 145.649 | 139.067 | -0.2136 | 6.02E-05  | 0.0004043 | Down-regulated |
| NM_001008938 | CKAP5          | 9793   | 19.0609 | 19.6854 | 16.7322 | 16.5244 | -0.2137 | 0.0002652 | 0.0015545 | Down-regulated |
| NM_012249    | RHOQ           | 23433  | 75.0152 | 74.2577 | 61.925  | 66.2088 | -0.2139 | 1.23E-05  | 9.53E-05  | Down-regulated |
| NM_002094    | GSPT1          | 2935   | 18.3885 | 16.1866 | 14.382  | 15.2546 | -0.214  | 0.0121131 | 0.0435783 | Down-regulated |
| NM_014856    | DENND4B        | 9909   | 16.5309 | 17.2361 | 15.16   | 13.7981 | -0.214  | 0.0078162 | 0.0300613 | Down-regulated |
| NM_001017    | RPS13          | 6207   | 2363.84 | 2257.83 | 1935.98 | 2015.93 | -0.2145 | 2.90E-06  | 2.51E-05  | Down-regulated |
| NM_001004    | RPLP2          | 6181   | 3348.07 | 3042.47 | 2697.16 | 2761.61 | -0.2148 | 0.0002012 | 0.0012113 | Down-regulated |
| NM_005998    | CCT3           | 7203   | 209.356 | 197.462 | 170.906 | 177.83  | -0.2154 | 9.51E-06  | 7.52E-05  | Down-regulated |
| NM_005499    | UBA2           | 10054  | 49.0362 | 46.9393 | 40.6868 | 41.541  | -0.2155 | 0.0005436 | 0.0029641 | Down-regulated |
| NM_001025091 | ABCF1          | 23     | 45.6804 | 45.4182 | 40.6666 | 37.3911 | -0.2158 | 0.0009124 | 0.0047233 | Down-regulated |
| NM_001626    | AKT2           | 208    | 28.9295 | 31.9182 | 27.3178 | 24.7804 | -0.2158 | 0.0082214 | 0.0313984 | Down-regulated |
| NM_004094    | EIF2S1         | 1965   | 30.0372 | 28.2875 | 23.8163 | 26.0852 | -0.2168 | 0.0046102 | 0.0191038 | Down-regulated |
| NM_005968    | HNRNPM         | 4670   | 79.8235 | 76.4021 | 67.5448 | 66.2022 | -0.217  | 3.92E-05  | 0.0002742 | Down-regulated |
| NM_014593    | CXXC1          | 30827  | 25.7008 | 23.9016 | 21.8048 | 20.6031 | -0.2171 | 0.0129404 | 0.0460089 | Down-regulated |
| NM_012473    | TXN2           | 25828  | 72.1876 | 68.4343 | 61.3295 | 58.8532 | -0.2178 | 0.0055384 | 0.0223917 | Down-regulated |
| NM_006453    | TBL3           | 10607  | 30.2179 | 30.203  | 25.9222 | 25.7277 | -0.2182 | 0.0034402 | 0.014848  | Down-regulated |
| NM_001867    | COX7C          | 1350   | 2689.51 | 2436.45 | 2138.07 | 2218.54 | -0.2184 | 0.0012506 | 0.0062193 | Down-regulated |
| NM_005662    | VDAC3          | 7419   | 73.0907 | 68.8925 | 62.243  | 59.0681 | -0.2185 | 0.003562  | 0.0153113 | Down-regulated |
| NM_015959    | TMX2           | 51075  | 47.5419 | 44.3943 | 39.1175 | 39.4384 | -0.2186 | 0.0085654 | 0.0325002 | Down-regulated |
| NM_004930    | CAPZB          | 832    | 120.743 | 116.002 | 102.887 | 99.5397 | -0.2187 | 4.29E-05  | 0.0002972 | Down-regulated |
| NM_005189    | CBX2           | 84733  | 17.2178 | 18.4562 | 14.9923 | 15.4856 | -0.2192 | 0.0076193 | 0.029464  | Down-regulated |
| NM_000987    | RPL26          | 6154   | 1650.02 | 1572.34 | 1326.46 | 1420.74 | -0.2193 | 4.47E-05  | 0.0003088 | Down-regulated |
| NM_001686    | ATP5B          | 506    | 592.104 | 570.301 | 497.586 | 496.401 | -0.2193 | 3.50E-11  | 5.37E-10  | Down-regulated |
| NM_001317724 | NOL7           | 51406  | 128.071 | 122.237 | 107.352 | 106.166 | -0.2199 | 0.0028217 | 0.0125093 | Down-regulated |
| NM_000976    | RPL12          | 6136   | 1922.44 | 1776.58 | 1565.95 | 1589.19 | -0.2199 | 9.43E-06  | 7.47E-05  | Down-regulated |
| NM_006098    | RACK1          | 10399  | 1186.84 | 1141.53 | 990.113 | 998.839 | -0.2201 | 1.00E-10  | 1.47E-09  | Down-regulated |
| NM_017801    | CMTM6          | 54918  | 34.7902 | 32.7762 | 27.5133 | 30.1445 | -0.2204 | 0.0049181 | 0.0202042 | Down-regulated |
| NM_006320    | PGRMC2         | 10424  | 22.5571 | 22.6228 | 19.2371 | 19.3112 | -0.2209 | 0.0015796 | 0.0075968 | Down-regulated |
| NM_001080453 | INTS1          | 26173  | 29.9717 | 30.0766 | 26.8111 | 24.4544 | -0.2211 | 0.0003929 | 0.0022171 | Down-regulated |
| NM_023018    | NADK           | 65220  | 51.6078 | 49.6659 | 44.4808 | 41.9313 | -0.2214 | 0.0002805 | 0.0016365 | Down-regulated |
| NM_003676    | DEGS1          | 8560   | 40.2976 | 39.8577 | 33.3256 | 35.0505 | -0.2214 | 0.0041213 | 0.0173447 | Down-regulated |
| NM_002792    | PSMA7          | 5688   | 863.433 | 834.467 | 722.278 | 726.5   | -0.2215 | 1.40E-10  | 2.05E-09  | Down-regulated |
| NM_012341    | GTPBP4         | 23560  | 33.981  | 35.8825 | 28.9602 | 30.5893 | -0.2219 | 0.0049977 | 0.0204872 | Down-regulated |
| NM_001762    | CCT6A          | 908    | 126.318 | 118.215 | 102.567 | 105.985 | -0.2228 | 1.79E-05  | 0.0001342 | Down-regulated |
| NM_007140    | RPL10A         | 4736   | 1078.56 | 1029.68 | 900.431 | 894.827 | -0.223  | 3.96E-08  | 4.39E-07  | Down-regulated |
| NM_014744    | EIF4A3         | 9775   | 79.8432 | 83.3655 | 70.9861 | 68.0708 | -0.223  | 0.0004885 | 0.002696  | Down-regulated |
| NM_002883    | RANGAP1        | 5905   | 61.9888 | 65.4017 | 55.4308 | 53.1834 | -0.2231 | 3.62E-05  | 0.0002544 | Down-regulated |
| NM_001111077 | EZR            | 7430   | 29.2638 | 27.0053 | 24.5277 | 23.3679 | -0.2239 | 0.006241  | 0.0247756 | Down-regulated |
| NM_012096    | APPL1          | 26060  | 10.8157 | 10.9533 | 9.30907 | 9.21167 | -0.2239 | 0.004659  | 0.0192683 | Down-regulated |
| NM_017902    | HIF1AN         | 55662  | 8.51014 | 8.62985 | 7.44292 | 7.14057 | -0.224  | 0.0086686 | 0.0327982 | Down-regulated |
| NM_015584    | POLDIP2        | 26073  | 80.613  | 77.5442 | 67.8194 | 66.9608 | -0.2241 | 6.26E-06  | 5.14E-05  | Down-regulated |
| NM_004593    | isophila)(TRAF | 6434   | 52.2727 | 49.3536 | 43.6794 | 42.9152 | -0.2242 | 2.33E-05  | 0.0001703 | Down-regulated |
| NM_002911    | UPF1           | 5976   | 19.6366 | 19.5542 | 17.5359 | 15.8174 | -0.2242 | 0.004163  | 0.0174856 | Down-regulated |
| NM_004548    | NDUFB10        | 4716   | 128.341 | 129.717 | 110.625 | 108.507 | -0.2246 | 0.0094868 | 0.0354032 | Down-regulated |
| NM_003288    | TPD52L2        | 7165   | 58.3011 | 56.9982 | 46.1155 | 51.9742 | -0.2246 | 0.0046047 | 0.019089  | Down-regulated |
| NM_005729    | PIPF           | 10105  | 40.6483 | 37.4172 | 32.2276 | 34.1758 | -0.2247 | 0.008497  | 0.0322959 | Down-regulated |
| NM_016589    | TIMMDC1        | 51300  | 81.0159 | 82.7833 | 69.9716 | 69.4748 | -0.2248 | 0.0002422 | 0.00143   | Down-regulated |
| NM_005918    | MDH2           | 4191   | 111.335 | 107.21  | 94.8349 | 91.2115 | -0.2254 | 8.13E-06  | 6.52E-05  | Down-regulated |
| NM_014280    | member C8(T    | 22826  | 117.982 | 110.689 | 97.6877 | 96.857  | -0.2256 | 8.20E-05  | 0.000537  | Down-regulated |
| NM_016417    | GLRX5          | 51218  | 63.1104 | 64.5155 | 55.5259 | 55.838  | -0.2257 | 0.010743  | 0.0393799 | Down-regulated |
| NR_002909    | SNHG3          | 8420   | 36.0955 | 34.8113 | 30.4117 | 29.8719 | -0.2258 | 0.0033658 | 0.014559  | Down-regulated |
| NM_001304504 | HMG20A         | 10363  | 14.851  | 14.4648 | 12.6473 | 12.2636 | -0.2259 | 0.0088175 | 0.0332693 | Down-regulated |
| NM_014303    | PES1           | 23481  | 69.4848 | 72.1926 | 62.6677 | 57.7769 | -0.2261 | 0.0007835 | 0.0041296 | Down-regulated |
| NM_0004793   | LONP1          | 9361   | 55.858  | 57.6517 | 49.7087 | 46.8514 | -0.2263 | 0.0001136 | 0.0007233 | Down-regulated |
| NM_001163809 | WDR81          | 124997 | 30.4635 | 34.6462 | 29.4101 | 25.8952 | -0.2264 | 0.0128816 | 0.0458427 | Down-regulated |
| NM_001136018 | EPHX1          | 2052   | 62.3313 | 65.8036 | 55.5325 | 53.3398 | -0.2266 | 0.0018919 | 0.0088599 | Down-regulated |
| NM_001319236 | RPL34          | 6164   | 1375.58 | 1242.68 | 1091.28 | 1128.66 | -0.2266 | 0.0003343 | 0.0019192 | Down-regulated |
| NM_004539    | NARS           | 4677   | 109.05  | 103.978 | 90.3503 | 90.7949 | -0.2272 | 6.03E-07  | 5.76E-06  | Down-regulated |
| NM_021961    | TEAD1          | 7003   | 18.7446 | 19.5376 | 15.7559 | 16.7932 | -0.2273 | 0.0001457 | 0.0009076 | Down-regulated |
| NM_006221    | PIN1           | 5300   | 109.282 | 104.826 | 93.9806 | 87.6526 | -0.2277 | 0.0024517 | 0.0111005 | Down-regulated |
| NM_001018138 | NME2           | 4831   | 201.168 | 199.938 | 168.351 | 171.717 | -0.2279 | 0.0009052 | 0.0046908 | Down-regulated |
| NM_016091    | EIF3L          | 51386  | 137.302 | 129.568 | 109.741 | 116.915 | -0.2282 | 7.91E-05  | 0.0005202 | Down-regulated |
| NM_014306    | RTCB           | 51493  | 44.9255 | 43.2286 | 36.922  | 37.8686 | -0.2283 | 0.0018299 | 0.0086073 | Down-regulated |
| NM_003000    | SDHB           | 6390   | 149.855 | 138.866 | 119.923 | 124.95  | -0.2288 | 0.000965  | 0.004951  | Down-regulated |
| NM_016579    | CD320          | 51293  | 167.141 | 153.521 | 137.137 | 134.901 | -0.229  | 0.0004289 | 0.002401  | Down-regulated |
| NM_015322    | FEM1B          | 10116  | 11.3584 | 10.5594 | 9.20926 | 9.3843  | -0.2292 | 0.0039644 | 0.0167991 | Down-regulated |
| NM_0007279   | U2AF2          | 11338  | 26.496  | 28.7489 | 23.7726 | 23.0846 | -0.2295 | 0.0048231 | 0.0198467 | Down-regulated |
| NM_025029    | MZT2B          | 80097  | 201.788 | 182.524 | 161.117 | 164.414 | -0.23   | 0.0018222 | 0.008582  | Down-regulated |
| NM_001130065 | MYO9B          | 4650   | 26.3509 | 26.3991 | 22.7512 | 22.0281 | -0.2301 | 2.06E-06  | 1.83E-05  | Down-regulated |
| NM_025149    | ACSF2          | 80221  | 27.7543 | 27.9101 | 23.9906 | 23.1536 | -0.2303 | 0.0076897 | 0.0296823 | Down-regulated |
| NM_002080    | GOT2           | 2806   | 56.1807 | 51.3411 | 46.2331 | 44.9103 | -0.2304 | 0.0014544 | 0.0070891 | Down-regulated |
| NM_000178    | GSS            | 2937   | 92.0175 | 88.3998 | 77.2138 | 75.7739 | -0.2305 | 3.54E-05  | 0.0002501 | Down-regulated |
| NM_006118    | HAX1           | 10456  | 112.957 | 104.372 | 90.1319 | 93.8644 | -0.2307 | 0.0022262 | 0.0101908 | Down-regulated |
| NM_001042616 | PIGY           | 84992  | 78.7575 | 74.2251 | 62.4975 | 67.0191 | -0.231  | 0.004132  | 0.0173786 | Down-regulated |
| NM_002097    | GTF3A          | 2971   | 67.3622 | 64.4837 | 55.3231 | 56.2586 | -0.2315 | 0.0022112 | 0.0101294 | Down-regulated |
| NM_014752    | SPCS2          | 9789   | 32.788  | 33.5421 | 28.0055 | 28.1769 | -0.2317 | 0.0010024 | 0.0051226 | Down-regulated |
| NM_006004    | UQCRH          | 7388   | 775.444 | 720.037 | 632.216 | 632.257 | -0.2318 | 2.81E-05  | 0.000202  | Down-regulated |
| NM_144703    | LSM14B         | 149986 | 33.2111 | 31.9264 | 27.494  | 27.6596 | -0.2318 | 0.0017298 | 0.0082113 | Down-regulated |

|              |               |        |         |         |         |         |         |           |           |                |
|--------------|---------------|--------|---------|---------|---------|---------|---------|-----------|-----------|----------------|
| NM_018346    | RSAD1         | 55316  | 23.0308 | 22.5444 | 19.9283 | 18.5982 | -0.2319 | 0.0132245 | 0.0468709 | Down-regulated |
| NM_001404    | EEFIG         | 1937   | 735.044 | 700.691 | 604.708 | 611.389 | -0.2327 | 2.88E-10  | 4.07E-09  | Down-regulated |
| NM_013236    | ATXN10        | 25814  | 36.0223 | 33.5235 | 28.8224 | 30.0484 | -0.2328 | 0.0011022 | 0.0055609 | Down-regulated |
| NM_014938    | MLXIP         | 22877  | 22.0414 | 23.8456 | 20.1451 | 18.6796 | -0.2335 | 0.0007968 | 0.004179  | Down-regulated |
| NM_006628    | ARPP19        | 10776  | 36.1565 | 35.1615 | 29.9367 | 30.446  | -0.2336 | 1.93E-06  | 1.71E-05  | Down-regulated |
| NM_002902    | RCN2          | 5955   | 80.9269 | 81.9616 | 67.1181 | 70.6865 | -0.234  | 3.13E-05  | 0.0002235 | Down-regulated |
| NM_006585    | CCT8          | 10694  | 140.951 | 135.596 | 116.957 | 117.001 | -0.2342 | 3.13E-07  | 3.10E-06  | Down-regulated |
| NM_003366    | UQCRC2        | 7385   | 58.3299 | 55.3912 | 48.4987 | 47.6055 | -0.235  | 0.0002829 | 0.0016482 | Down-regulated |
| NM_003973    | RPL14         | 9045   | 1499.28 | 1447.81 | 1240.16 | 1249.51 | -0.2354 | 2.59E-12  | 4.35E-11  | Down-regulated |
| NM_013442    | STOML2        | 30968  | 75.0866 | 75.2264 | 62.8492 | 64.1265 | -0.2354 | 0.0005179 | 0.0028362 | Down-regulated |
| NM_006445    | PRPF8         | 10594  | 76.8176 | 78.4977 | 65.4429 | 65.9471 | -0.2355 | 1.47E-12  | 2.54E-11  | Down-regulated |
| NM_014810    | CEP350        | 9857   | 4.05321 | 4.39741 | 3.53866 | 3.59248 | -0.2359 | 0.0111756 | 0.040702  | Down-regulated |
| NM_002139    | RBMX          | 27316  | 66.0289 | 62.7236 | 53.1555 | 55.5695 | -0.2361 | 0.0003399 | 0.0019481 | Down-regulated |
| NM_018255    | ELP2          | 55250  | 12.1252 | 13.3903 | 10.5111 | 11.0207 | -0.2361 | 0.0091499 | 0.0343269 | Down-regulated |
| NM_000885    | ITGA4         | 3676   | 8.23686 | 8.07345 | 6.61473 | 7.14701 | -0.2361 | 0.0088673 | 0.0334176 | Down-regulated |
| NM_031485    | GRWD1         | 83743  | 41.0271 | 41.4526 | 34.6049 | 35.0268 | -0.2361 | 0.0003709 | 0.0021052 | Down-regulated |
| NM_002532    | NUP88         | 4927   | 37.6726 | 36.3961 | 29.1529 | 33.3509 | -0.2362 | 0.0046641 | 0.0192809 | Down-regulated |
| NM_001131016 | CIZ1          | 25792  | 23.7383 | 21.2727 | 19.2879 | 18.6532 | -0.2365 | 0.0137519 | 0.0484435 | Down-regulated |
| NM_199069    | NDUFAF3       | 25915  | 97.8987 | 93.5496 | 79.9568 | 81.5959 | -0.2368 | 0.0002779 | 0.0016235 | Down-regulated |
| NM_005053    | RAD23A        | 5886   | 58.3191 | 56.2244 | 49.471  | 47.1802 | -0.2369 | 0.0009515 | 0.0048934 | Down-regulated |
| NM_0032797   | AIFM2         | 84883  | 26.24   | 25.3927 | 21.1725 | 22.372  | -0.2371 | 0.002019  | 0.0093817 | Down-regulated |
| NM_002841    | PTPRG         | 5793   | 10.7417 | 11.5651 | 9.26247 | 9.55581 | -0.2373 | 0.0043343 | 0.0181018 | Down-regulated |
| NM_006392    | NOP56         | 10528  | 54.5419 | 51.4055 | 45.612  | 43.7434 | -0.2376 | 0.0011323 | 0.0056936 | Down-regulated |
| NM_001134381 | TBC1D5        | 9779   | 12.047  | 11.9486 | 10.5166 | 9.70646 | -0.2381 | 0.0032183 | 0.0139788 | Down-regulated |
| NM_002492    | NDUFB5        | 4711   | 99.6737 | 95.072  | 81.8712 | 82.1487 | -0.2387 | 0.0014951 | 0.0072446 | Down-regulated |
| NM_002092    | GRSF1         | 2926   | 30.1846 | 30.4031 | 24.7532 | 26.3504 | -0.2389 | 1.16E-05  | 9.03E-05  | Down-regulated |
| NM_181042    | PBRM1         | 55193  | 8.93684 | 9.13776 | 7.27995 | 7.93313 | -0.2394 | 0.005561  | 0.0224735 | Down-regulated |
| NM_198318    | PBRM1         | 3276   | 203.752 | 203.277 | 173.689 | 169.365 | -0.2394 | 7.50E-08  | 8.04E-07  | Down-regulated |
| NM_001014    | RPS10         | 6204   | 1570.84 | 1479.03 | 1299.25 | 1266.02 | -0.24   | 9.49E-08  | 1.01E-06  | Down-regulated |
| NM_004475    | FLOT2         | 2319   | 73.1907 | 68.6846 | 61.1283 | 58.3517 | -0.2402 | 8.84E-05  | 0.0005744 | Down-regulated |
| NM_138570    | SLC38A10      | 124565 | 16.6226 | 17.782  | 14.6074 | 14.3313 | -0.2403 | 0.0127513 | 0.0454892 | Down-regulated |
| NM_015332    | NUDCD3        | 23386  | 14.9135 | 14.7426 | 12.7512 | 12.2103 | -0.2404 | 0.0020408 | 0.0094693 | Down-regulated |
| NM_000784    | CYP27A1       | 1593   | 28.1972 | 28.0739 | 24.477  | 22.8171 | -0.2408 | 0.0069472 | 0.0271676 | Down-regulated |
| NM_003072    | SMARCA4       | 6597   | 18.9553 | 19.216  | 16.8441 | 15.2628 | -0.2409 | 0.0016263 | 0.0077858 | Down-regulated |
| NM_0023937   | MRPL34        | 64981  | 185.992 | 174.549 | 145.312 | 157.691 | -0.241  | 0.0011791 | 0.0058992 | Down-regulated |
| NM_001136203 | CCDC124       | 115098 | 193.79  | 172.453 | 154.479 | 153.141 | -0.2417 | 0.0018548 | 0.0087078 | Down-regulated |
| NM_000485    | APRT          | 353    | 152.221 | 146.027 | 126.279 | 124.128 | -0.2417 | 0.0010606 | 0.0053769 | Down-regulated |
| NM_005412    | SHMT2         | 6472   | 86.4807 | 89.3209 | 73.7706 | 74.1043 | -0.2424 | 1.76E-06  | 1.57E-05  | Down-regulated |
| NM_024040    | CUEDC2        | 79004  | 54.0411 | 51.8432 | 43.3476 | 45.4838 | -0.2426 | 0.0110052 | 0.0401599 | Down-regulated |
| NM_014188    | SSU72         | 29101  | 221.057 | 214.334 | 184.416 | 181.619 | -0.2427 | 1.62E-07  | 1.68E-06  | Down-regulated |
| NM_033643    | RPL36         | 25873  | 1876.71 | 1767.74 | 1535    | 1512.74 | -0.2437 | 3.12E-06  | 2.68E-05  | Down-regulated |
| NM_003908    | EIF2S2        | 8894   | 88.8729 | 86.1464 | 73.1695 | 73.9428 | -0.2439 | 2.05E-07  | 2.09E-06  | Down-regulated |
| NM_022460    | HS1BP3        | 64342  | 27.1285 | 27.0125 | 22.7686 | 22.6474 | -0.2439 | 0.0032717 | 0.0141943 | Down-regulated |
| NM_000970    | RPL6          | 6128   | 1252.2  | 1189.14 | 985.447 | 1063.32 | -0.2445 | 3.08E-06  | 2.65E-05  | Down-regulated |
| NM_013321    | SNX8          | 29886  | 26.44   | 26.4971 | 21.6932 | 22.7632 | -0.2445 | 7.00E-05  | 0.0004655 | Down-regulated |
| NM_017812    | CHCHD3        | 54927  | 86.7191 | 78.2475 | 67.4131 | 70.9515 | -0.2446 | 0.0019139 | 0.0089521 | Down-regulated |
| NM_013276    | SHPK          | 23729  | 14.0176 | 14.6634 | 11.895  | 12.139  | -0.2452 | 0.0072943 | 0.0283682 | Down-regulated |
| NM_020457    | THAP11        | 57215  | 31.9203 | 30.2223 | 26.1036 | 25.966  | -0.2454 | 0.00816   | 0.0312077 | Down-regulated |
| NM_172130    | KCNAB2        | 8514   | 37.2431 | 36.2465 | 30.9999 | 30.7007 | -0.2454 | 6.41E-06  | 5.25E-05  | Down-regulated |
| NM_001320733 | CAPG          | 822    | 590.184 | 560.448 | 490.637 | 474.773 | -0.2458 | 1.07E-08  | 1.27E-07  | Down-regulated |
| NM_002085    | GPX4          | 2879   | 243.477 | 242.357 | 203.498 | 203.82  | -0.2459 | 1.34E-06  | 1.22E-05  | Down-regulated |
| NM_014612    | FAM120A       | 23196  | 18.1271 | 19.4425 | 15.2507 | 16.2526 | -0.2459 | 0.0018036 | 0.0085067 | Down-regulated |
| NM_130440    | PTPRF         | 5792   | 19.5654 | 21.8849 | 17.1856 | 17.5817 | -0.2459 | 0.0009517 | 0.0048934 | Down-regulated |
| NM_025076    | UXS1          | 80146  | 37.7537 | 35.1668 | 29.8164 | 31.211  | -0.2477 | 0.0041169 | 0.017334  | Down-regulated |
| NM_001031711 | ERGC1         | 57222  | 78.4731 | 76.2385 | 66.1358 | 63.4608 | -0.2485 | 8.98E-07  | 8.40E-06  | Down-regulated |
| NM_001016    | RPS12         | 6206   | 2949.5  | 2695.38 | 2323.92 | 2386.16 | -0.2487 | 1.06E-05  | 8.33E-05  | Down-regulated |
| NM_004704    | component, ho | 9136   | 52.1664 | 49.7699 | 43.3093 | 41.893  | -0.2491 | 0.0021637 | 0.0099482 | Down-regulated |
| NM_003313    | TSTA3         | 7264   | 128.965 | 116.932 | 110.073 | 95.3116 | -0.2492 | 0.0083626 | 0.031874  | Down-regulated |
| NM_001127320 | UBAP2L        | 9898   | 30.886  | 30.6307 | 26.6888 | 24.7408 | -0.2498 | 0.0005542 | 0.0030159 | Down-regulated |
| NM_030579    | CYB5B         | 80777  | 35.6597 | 34.5374 | 28.9377 | 29.8203 | -0.2499 | 1.04E-05  | 8.18E-05  | Down-regulated |
| NM_018457    | PRR13         | 54458  | 126.148 | 125.127 | 103.231 | 106.879 | -0.25   | 4.12E-05  | 0.0002866 | Down-regulated |
| NM_001042535 | AGAP3         | 116988 | 27.9403 | 28.3995 | 24.0174 | 23.0318 | -0.2503 | 0.0030694 | 0.0134233 | Down-regulated |
| NM_015904    | EIF5B         | 9669   | 34.7109 | 32.6166 | 27.3951 | 28.9141 | -0.2503 | 9.42E-05  | 0.0006097 | Down-regulated |
| NM_005180    | BMI1          | 648    | 16.0665 | 15.8566 | 13.4398 | 13.2116 | -0.2512 | 0.0050267 | 0.0205973 | Down-regulated |
| NM_013346    | SNX12         | 29934  | 83.1453 | 75.2061 | 65.9375 | 66.3535 | -0.2515 | 0.0002113 | 0.0012668 | Down-regulated |
| NM_002491    | NDUFB3        | 4709   | 95.1329 | 88.8737 | 75.9631 | 77.2575 | -0.2515 | 0.0140158 | 0.0492459 | Down-regulated |
| NM_000345    | SNCA          | 6622   | 54.357  | 50.3342 | 43.9125 | 43.564  | -0.2515 | 5.70E-05  | 0.0003863 | Down-regulated |
| NM_001011    | RPS7          | 6201   | 1220.4  | 1111.61 | 970.96  | 974.768 | -0.2517 | 4.83E-06  | 4.04E-05  | Down-regulated |
| NM_015077    | SARM1         | 23098  | 6.68373 | 7.18099 | 5.89571 | 5.66603 | -0.2519 | 0.0105682 | 0.038817  | Down-regulated |
| NM_005022    | PFN1          | 5216   | 1331.43 | 1238.91 | 1067.2  | 1079.89 | -0.2522 | 1.25E-08  | 1.47E-07  | Down-regulated |
| NM_001394    | DUSP4         | 1846   | 105.805 | 105.34  | 89.7306 | 86.8013 | -0.2523 | 5.04E-13  | 9.09E-12  | Down-regulated |
| NM_001688    | ATP5F1        | 515    | 73.751  | 67.2763 | 58.4551 | 59.2479 | -0.2524 | 0.0003372 | 0.0019342 | Down-regulated |
| NM_005787    | ALG3          | 10195  | 70.4523 | 62.0893 | 55.991  | 54.4185 | -0.2529 | 0.005423  | 0.0220086 | Down-regulated |
| NM_018164    | ASUN          | 55726  | 43.6994 | 41.4512 | 36.2785 | 34.7881 | -0.2529 | 0.0001314 | 0.0008261 | Down-regulated |
| NM_030752    | TCP1          | 6950   | 92.7056 | 85.364  | 74.7042 | 73.951  | -0.2529 | 2.76E-05  | 0.0001991 | Down-regulated |
| NM_002428    | MMP15         | 4324   | 20.5045 | 21.2045 | 18.0099 | 16.7701 | -0.2537 | 0.0010793 | 0.0054597 | Down-regulated |
| NM_017437    | CPSF2         | 53981  | 14.3769 | 12.4979 | 10.9893 | 11.3806 | -0.2543 | 0.0127004 | 0.0453245 | Down-regulated |
| NM_006212    | PFKFB2        | 5208   | 7.40898 | 7.81771 | 6.50694 | 6.17814 | -0.2543 | 0.007102  | 0.0276992 | Down-regulated |
| NM_001026    | RPS24         | 6229   | 984.531 | 930.439 | 781.709 | 812.002 | -0.2547 | 5.82E-07  | 5.57E-06  | Down-regulated |
| NM_000661    | RPL9          | 6133   | 1120.13 | 1045.57 | 868.486 | 934.394 | -0.2549 | 1.07E-05  | 8.39E-05  | Down-regulated |
| NM_001981    | EPS15         | 2060   | 12.3531 | 12.3768 | 9.6932  | 10.8902 | -0.2551 | 0.007798  | 0.0300113 | Down-regulated |
| NM_006265    | RAD21         | 5885   | 49.6059 | 48.8676 | 39.4007 | 42.6724 | -0.2552 | 3.07E-05  | 0.0002191 | Down-regulated |
| NM_004960    | FUS           | 2521   | 68.6441 | 66.7999 | 58.2828 | 54.6567 | -0.2554 | 2.76E-07  | 2.76E-06  | Down-regulated |
| NM_003142    | SSB           | 6741   | 101.808 | 94.6044 | 82.0134 | 81.6013 | -0.2554 | 5.84E-05  | 0.0003943 | Down-regulated |

|              |                |        |         |         |         |         |         |           |           |                |
|--------------|----------------|--------|---------|---------|---------|---------|---------|-----------|-----------|----------------|
| NM_015154    | MESDC2         | 23184  | 22.2767 | 21.5755 | 18.3857 | 18.1576 | -0.2555 | 0.0001974 | 0.0011911 | Down-regulated |
| NM_005911    | MAT2A          | 4144   | 57.4609 | 61.1704 | 48.9804 | 49.8709 | -0.2556 | 1.62E-05  | 0.0001224 | Down-regulated |
| NM_001001410 | TSR3           | 115939 | 80.2891 | 78.0346 | 68.9136 | 62.8024 | -0.2557 | 0.0026478 | 0.0118504 | Down-regulated |
| NM_001029    | RPS26          | 6231   | 1251.88 | 1132.16 | 977.011 | 1005.62 | -0.2558 | 1.86E-05  | 0.0001384 | Down-regulated |
| NM_001003    | RPL1           | 6176   | 5620.82 | 5188.04 | 4366.93 | 4606.01 | -0.2562 | 4.35E-06  | 3.66E-05  | Down-regulated |
| NM_012423    | RPL13A         | 23521  | 506.382 | 476.643 | 396.271 | 422.194 | -0.2562 | 1.62E-06  | 1.46E-05  | Down-regulated |
| NM_000990    | RPL27A         | 6157   | 225.893 | 216.154 | 178.942 | 189.489 | -0.2563 | 5.50E-09  | 6.75E-08  | Down-regulated |
| NM_000988    | RPL27          | 6155   | 4574.37 | 4242.2  | 3699    | 3618.63 | -0.2566 | 1.27E-07  | 1.33E-06  | Down-regulated |
| NM_031992    | EIF4H          | 7458   | 87.4734 | 86.0785 | 69.6818 | 74.8162 | -0.2567 | 7.39E-06  | 5.98E-05  | Down-regulated |
| NM_198836    | ACACA          | 31     | 18.969  | 19.7569 | 16.888  | 15.3527 | -0.2567 | 0.0001592 | 0.0009813 | Down-regulated |
| NM_006404    | PROCR          | 10544  | 74.6487 | 71.9263 | 59.223  | 62.704  | -0.2569 | 0.0004738 | 0.0026282 | Down-regulated |
| NM_004738    | VAPB           | 9217   | 10.7601 | 9.91876 | 8.38253 | 8.81194 | -0.2576 | 0.0017909 | 0.0084555 | Down-regulated |
| NM_001069    | TUBB2A         | 7280   | 65.5044 | 65.108  | 54.7057 | 53.9096 | -0.2576 | 0.0001313 | 0.0008258 | Down-regulated |
| NM_006373    | VAT1           | 10493  | 440.145 | 420.218 | 362.152 | 353.776 | -0.2587 | 3.53E-12  | 5.83E-11  | Down-regulated |
| NM_001321018 | UBA52          | 7311   | 18.5283 | 19.0163 | 14.8373 | 16.3349 | -0.2587 | 0.0054955 | 0.0222464 | Down-regulated |
| NM_007189    | ABCF2          | 10061  | 8.29418 | 8.31571 | 6.86696 | 6.90054 | -0.2593 | 0.0140893 | 0.0494769 | Down-regulated |
| NM_032014    | MRPS24         | 64951  | 141.873 | 127.056 | 111.352 | 111.204 | -0.2593 | 0.0093012 | 0.0348198 | Down-regulated |
| NM_031991    | PTBP1          | 5725   | 37.1158 | 37.0001 | 32.0587 | 29.4991 | -0.2594 | 0.0002671 | 0.001564  | Down-regulated |
| NM_006429    | CCT7           | 10574  | 166.387 | 156.457 | 134.25  | 134.025 | -0.2598 | 1.77E-07  | 1.83E-06  | Down-regulated |
| NM_015194    | MYO1D          | 4642   | 42.6118 | 41.3148 | 35.5123 | 34.2505 | -0.26   | 1.01E-07  | 1.07E-06  | Down-regulated |
| NM_000983    | RPL22          | 6146   | 269.409 | 251.458 | 212.626 | 220.088 | -0.2603 | 1.13E-07  | 1.19E-06  | Down-regulated |
| NM_080821    | FAM210B        | 116151 | 72.9457 | 68.2957 | 57.4899 | 59.8068 | -0.2605 | 7.60E-06  | 6.13E-05  | Down-regulated |
| NM_006565    | CTCF           | 10664  | 14.559  | 14.8753 | 12.0951 | 12.3279 | -0.2605 | 0.0027469 | 0.0122202 | Down-regulated |
| NM_001127228 | CBX1           | 10951  | 57.0992 | 53.5696 | 46.4855 | 45.3692 | -0.2609 | 0.000124  | 0.0007832 | Down-regulated |
| NM_019044    | CCDC93         | 54520  | 6.21033 | 6.41656 | 5.22356 | 5.24302 | -0.2609 | 0.008752  | 0.0330547 | Down-regulated |
| NM_032228    | FAR1           | 84188  | 20.2711 | 21.4822 | 16.6578 | 17.9894 | -0.2611 | 0.0005815 | 0.0031504 | Down-regulated |
| NM_139159    | DPP9           | 91039  | 38.6618 | 40.8609 | 34.3938 | 31.5938 | -0.2612 | 0.0001681 | 0.0010294 | Down-regulated |
| NM_032804    | ADO            | 84890  | 15.7578 | 14.6151 | 12.6748 | 12.4805 | -0.2615 | 0.0054593 | 0.0221374 | Down-regulated |
| NM_020726    | NLN            | 57486  | 7.72213 | 7.66926 | 6.43094 | 6.33202 | -0.2616 | 0.0008644 | 0.0045038 | Down-regulated |
| NM_015908    | SRRT           | 51593  | 27.1488 | 26.44   | 23.02   | 21.397  | -0.2618 | 0.0012217 | 0.0060869 | Down-regulated |
| NM_002910    | RENBP          | 5973   | 67.9622 | 63.0552 | 55.0101 | 53.5644 | -0.2619 | 0.0010498 | 0.0053292 | Down-regulated |
| NM_000994    | RPL32          | 6161   | 492.394 | 465.809 | 385.269 | 409.727 | -0.262  | 1.13E-07  | 1.19E-06  | Down-regulated |
| NM_001315491 | MPZ            | 4359   | 49.1395 | 50.3708 | 40.5544 | 41.9274 | -0.2621 | 0.0002393 | 0.0014147 | Down-regulated |
| NM_006003    | UQCRFS1        | 7386   | 89.342  | 84.9686 | 73.404  | 71.0265 | -0.2621 | 0.0004323 | 0.0024166 | Down-regulated |
| NM_001127496 | SPRY4          | 81848  | 62.3457 | 64.4994 | 54.1556 | 51.0083 | -0.2634 | 2.60E-07  | 2.61E-06  | Down-regulated |
| NM_001829    | CLCN3          | 1182   | 14.9305 | 14.7481 | 12.0028 | 12.5739 | -0.2642 | 0.0001575 | 0.0009733 | Down-regulated |
| NM_001077198 | ATG9A          | 79065  | 26.1226 | 26.6311 | 23.0429 | 20.6053 | -0.2643 | 0.0014137 | 0.0069191 | Down-regulated |
| NM_000637    | GSR            | 2936   | 42.3602 | 39.6422 | 32.9592 | 34.9187 | -0.2647 | 0.0001669 | 0.001024  | Down-regulated |
| NM_000996    | RPL35A         | 6165   | 3325.32 | 3069.3  | 2609.51 | 2665.83 | -0.2647 | 5.93E-07  | 5.67E-06  | Down-regulated |
| NM_006817    | ERP29          | 10961  | 128.458 | 121.037 | 103.614 | 102.859 | -0.2651 | 7.56E-06  | 6.10E-05  | Down-regulated |
| NM_016196    | RBM19          | 9904   | 12.2254 | 12.014  | 9.95575 | 10.0636 | -0.2656 | 0.0040521 | 0.0170989 | Down-regulated |
| NM_014175    | MRPL15         | 29088  | 44.5228 | 42.3429 | 34.2622 | 37.505  | -0.2657 | 0.0037462 | 0.0159986 | Down-regulated |
| NM_006936    | SUMO3          | 6612   | 90.8632 | 84.3515 | 70.7714 | 74.117  | -0.2659 | 9.66E-05  | 0.0006245 | Down-regulated |
| NM_017659    | QPCTL          | 54814  | 34.9193 | 35.0804 | 29.0517 | 28.7843 | -0.2663 | 0.0003626 | 0.0020652 | Down-regulated |
| NM_005881    | BCKDK          | 10295  | 32.5273 | 31.5033 | 27.3427 | 25.523  | -0.2666 | 0.0026483 | 0.0118504 | Down-regulated |
| NM_025075    | THOC7          | 80145  | 73.5131 | 70.8107 | 58.7744 | 60.3161 | -0.2667 | 0.0030649 | 0.0134068 | Down-regulated |
| NM_032383    | HPS3           | 84343  | 16.1359 | 15.5957 | 12.2008 | 13.9687 | -0.267  | 0.0087475 | 0.0330444 | Down-regulated |
| NM_133494    | NEK7           | 140609 | 28.14   | 27.5871 | 22.9283 | 23.1176 | -0.2675 | 1.27E-05  | 9.75E-05  | Down-regulated |
| NM_001025248 | DUT            | 1854   | 40.0341 | 42.3391 | 32.7169 | 35.2399 | -0.268  | 0.0013068 | 0.0064635 | Down-regulated |
| NM_145686    | MAP4K4         | 9448   | 12.2781 | 12.3569 | 10.7018 | 9.61719 | -0.2683 | 0.0010397 | 0.0052806 | Down-regulated |
| NM_004728    | DDX21          | 9188   | 37.1893 | 34.1129 | 28.9563 | 29.9049 | -0.2689 | 4.71E-05  | 0.0003243 | Down-regulated |
| NM_003860    | BANF1          | 8815   | 122.005 | 112.205 | 97.7883 | 95.2529 | -0.2691 | 0.0003083 | 0.0017829 | Down-regulated |
| NM_016497    | MRPL51         | 51258  | 206.702 | 186.05  | 163.672 | 159.28  | -0.2698 | 0.0022053 | 0.0101072 | Down-regulated |
| NM_007172    | NUP50          | 10762  | 32.2569 | 31.0577 | 26.7783 | 25.4815 | -0.2699 | 3.88E-06  | 3.28E-05  | Down-regulated |
| NM_001025    | RPS23          | 6228   | 263.207 | 234.182 | 199.82  | 210.46  | -0.27   | 2.29E-05  | 0.000168  | Down-regulated |
| NM_006430    | CCT4           | 10575  | 110.317 | 105.499 | 87.6545 | 90.4317 | -0.2701 | 8.31E-08  | 8.85E-07  | Down-regulated |
| NM_006694    | JTB            | 10899  | 52.4907 | 47.143  | 41.7444 | 40.1983 | -0.2708 | 0.0041083 | 0.0173017 | Down-regulated |
| NM_003091    | SNRPB          | 6628   | 194.792 | 176.941 | 162.99  | 142.797 | -0.2711 | 0.0020478 | 0.0094971 | Down-regulated |
| NM_000055    | BCHE           | 590    | 26.3399 | 28.2215 | 22.0821 | 22.8158 | -0.2713 | 0.0024155 | 0.0109523 | Down-regulated |
| NM_015049    | TRAK2          | 66008  | 17.6663 | 16.0005 | 13.7021 | 14.0359 | -0.2713 | 0.0004235 | 0.0023742 | Down-regulated |
| NM_022338    | C11orf24       | 53838  | 37.1601 | 36.4363 | 30.1788 | 30.3786 | -0.2715 | 0.0004533 | 0.0025213 | Down-regulated |
| NM_020202    | NIT2           | 56954  | 77.3842 | 73.3682 | 58.3616 | 65.56   | -0.2717 | 0.0034627 | 0.0149318 | Down-regulated |
| NM_032408    | BAZ1B          | 9031   | 16.4633 | 15.7001 | 12.805  | 13.6872 | -0.272  | 0.0002463 | 0.0014518 | Down-regulated |
| NM_002486    | NCBP1          | 4686   | 8.61796 | 8.07623 | 6.82397 | 6.89915 | -0.2721 | 0.0076279 | 0.0294855 | Down-regulated |
| NM_018834    | MATR3          | 9782   | 47.9045 | 50.1211 | 39.2551 | 41.5038 | -0.2724 | 5.51E-07  | 5.30E-06  | Down-regulated |
| NM_000971    | RPL7           | 6129   | 1588.35 | 1515.52 | 1278.36 | 1276.82 | -0.2724 | 1.76E-13  | 3.29E-12  | Down-regulated |
| NM_000284    | ide) alpha 1(F | 5160   | 28.4168 | 28.7703 | 23.5366 | 23.5495 | -0.2727 | 4.77E-05  | 0.0003281 | Down-regulated |
| NM_005243    | EWSR1          | 2130   | 31.6788 | 29.7042 | 25.4957 | 24.986  | -0.2728 | 0.0006067 | 0.0032728 | Down-regulated |
| NM_005559    | LAMA1          | 284217 | 11.233  | 11.4867 | 9.49894 | 9.21339 | -0.2728 | 1.72E-05  | 0.0001293 | Down-regulated |
| NM_007262    | PARK7          | 11315  | 290.854 | 271.225 | 232.663 | 229.756 | -0.2728 | 2.31E-06  | 2.03E-05  | Down-regulated |
| NM_000984    | RPL23A         | 6147   | 1029.41 | 964.749 | 807.374 | 833.856 | -0.2728 | 3.94E-09  | 4.89E-08  | Down-regulated |
| NM_000071    | CBS            | 875    | 41.6734 | 39.4041 | 33.8759 | 32.8472 | -0.2729 | 0.0001228 | 0.0007764 | Down-regulated |
| NM_001640    | APEH           | 327    | 55.6711 | 56.7758 | 46.8179 | 45.7711 | -0.273  | 9.18E-07  | 8.56E-06  | Down-regulated |
| NM_003901    | SGPL1          | 8879   | 6.82352 | 7.36702 | 5.74135 | 5.90264 | -0.2731 | 0.0126027 | 0.0450598 | Down-regulated |
| NM_006547    | IGF2BP3        | 10643  | 17.5385 | 16.424  | 14.1485 | 13.7874 | -0.2733 | 0.0011139 | 0.0056111 | Down-regulated |
| NM_138408    | GTF3C6         | 112495 | 89.0449 | 86.759  | 73.9801 | 70.3962 | -0.2738 | 0.0014593 | 0.0071003 | Down-regulated |
| NM_004927    | MRPL49         | 740    | 45.3205 | 45.5986 | 35.0808 | 39.5848 | -0.2741 | 0.0018333 | 0.0086191 | Down-regulated |
| NM_020774    | MIB1           | 57534  | 15.321  | 15.7461 | 13.0072 | 12.5525 | -0.2744 | 1.53E-06  | 1.38E-05  | Down-regulated |
| NM_004383    | CSK            | 1445   | 49.36   | 49.4147 | 41.9626 | 39.236  | -0.2746 | 2.37E-05  | 0.0001731 | Down-regulated |
| NM_144564    | SLC39A3        | 29985  | 58.0654 | 54.3395 | 46.5331 | 45.7098 | -0.2748 | 0.0011887 | 0.0059415 | Down-regulated |
| NM_006601    | PTGES3         | 10728  | 168.922 | 168.655 | 136.688 | 140.989 | -0.275  | 2.90E-11  | 4.48E-10  | Down-regulated |
| NM_014689    | DOCK10         | 55619  | 6.23618 | 6.34736 | 5.27515 | 5.04339 | -0.2751 | 0.0047393 | 0.0195497 | Down-regulated |
| NM_002834    | PTPN11         | 5781   | 24.9582 | 24.3971 | 20.6211 | 19.9604 | -0.2751 | 8.28E-07  | 7.78E-06  | Down-regulated |
| NM_005271    | GLUD1          | 2746   | 34.0504 | 32.0619 | 26.8247 | 27.4941 | -0.2751 | 4.81E-05  | 0.0003306 | Down-regulated |

|              |               |        |         |         |         |         |         |           |           |                |
|--------------|---------------|--------|---------|---------|---------|---------|---------|-----------|-----------|----------------|
| NM_001007793 | BUB3          | 9184   | 34.5058 | 32.9437 | 28.7176 | 26.5244 | -0.2755 | 0.0095815 | 0.0356773 | Down-regulated |
| NM_006597    | ) member 8(F  | 3312   | 717.364 | 697.093 | 562.126 | 600.508 | -0.276  | 2.60E-10  | 3.69E-09  | Down-regulated |
| NM_014754    | PTDSS1        | 9791   | 50.9548 | 49.966  | 40.9107 | 41.992  | -0.2761 | 4.83E-06  | 4.04E-05  | Down-regulated |
| NM_032231    | FAM96A        | 84191  | 68.42   | 70.1656 | 56.9991 | 56.6065 | -0.2763 | 0.0011882 | 0.0059415 | Down-regulated |
| NM_006088    | TUBB4B        | 10383  | 212.199 | 201.746 | 169.612 | 170.436 | -0.2765 | 3.79E-09  | 4.71E-08  | Down-regulated |
| NM_003685    | KHSRP         | 8570   | 101.08  | 98.072  | 82.0629 | 81.6024 | -0.2766 | 1.95E-11  | 3.04E-10  | Down-regulated |
| NM_004597    | SNRPD2        | 6633   | 674.009 | 625.969 | 516.225 | 549.182 | -0.277  | 6.73E-06  | 5.48E-05  | Down-regulated |
| NM_024092    | TMEM109       | 79073  | 55.9305 | 54.482  | 47.1501 | 43.397  | -0.2776 | 8.17E-05  | 0.0005351 | Down-regulated |
| NM_181697    | PRDX1         | 5052   | 909.391 | 853.712 | 718.267 | 727.929 | -0.2778 | 2.35E-10  | 3.37E-09  | Down-regulated |
| NM_018072    | HEATR1        | 55127  | 8.71659 | 8.41055 | 6.72424 | 7.31332 | -0.278  | 0.0010792 | 0.0054597 | Down-regulated |
| NM_018285    | IMP3          | 55272  | 90.5834 | 88.4357 | 72.6089 | 74.147  | -0.2781 | 6.38E-05  | 0.0004273 | Down-regulated |
| NM_205767    | C19orf70      | 125988 | 138.082 | 127.205 | 106.426 | 110.57  | -0.2785 | 0.0006412 | 0.0034403 | Down-regulated |
| NM_145253    | UBALD1        | 124402 | 43.9294 | 42.3948 | 37.4395 | 33.076  | -0.2789 | 0.0095044 | 0.0354483 | Down-regulated |
| NM_000973    | RPL8          | 6132   | 2100.34 | 1994.1  | 1663.37 | 1692.08 | -0.2791 | 5.20E-13  | 9.36E-12  | Down-regulated |
| NM_001098173 | PRDM7         | 11105  | 14.6071 | 14.1368 | 11.5494 | 11.9524 | -0.2792 | 0.0054122 | 0.0219697 | Down-regulated |
| NM_006709    | EHMT2         | 10919  | 18.163  | 18.402  | 15.0333 | 14.9118 | -0.2794 | 0.0002801 | 0.0016348 | Down-regulated |
| NM_001469    | XRCC6         | 2547   | 130.421 | 129.026 | 115.249 | 97.0482 | -0.2795 | 0.0010638 | 0.0053915 | Down-regulated |
| NM_014520    | MYBBP1A       | 10514  | 60.2616 | 59.9123 | 48.558  | 49.9954 | -0.2795 | 8.35E-11  | 1.24E-09  | Down-regulated |
| NM_004996    | ABCC1         | 4363   | 13.0111 | 14.3178 | 11.5516 | 10.8133 | -0.2805 | 0.00127   | 0.0063062 | Down-regulated |
| NM_007062    | PWP1          | 11137  | 53.8763 | 51.7474 | 42.4664 | 44.013  | -0.2807 | 5.64E-06  | 4.68E-05  | Down-regulated |
| NM_002154    | ) member 4(F  | 3308   | 80.3173 | 80.6759 | 65.9835 | 65.9452 | -0.2807 | 1.52E-11  | 2.39E-10  | Down-regulated |
| NM_015005    | CEP170B       | 283638 | 11.3136 | 11.0515 | 9.01331 | 9.28919 | -0.2807 | 0.0002242 | 0.0013339 | Down-regulated |
| NM_199166    | ALAS1         | 211    | 44.0902 | 40.4787 | 34.0474 | 35.1023 | -0.2813 | 0.0004475 | 0.002493  | Down-regulated |
| NM_031844    | HNRNPU        | 3192   | 35.896  | 38.4556 | 29.9855 | 30.8842 | -0.2816 | 4.32E-07  | 4.21E-06  | Down-regulated |
| NM_173602    | DIP2B         | 57609  | 14.2553 | 14.7687 | 11.851  | 11.9046 | -0.2817 | 2.49E-06  | 2.17E-05  | Down-regulated |
| NM_012388    | BLOC1S6       | 26258  | 14.4908 | 14.3273 | 12.1604 | 11.3695 | -0.2828 | 0.0019525 | 0.009198  | Down-regulated |
| NM_017444    | CHRAC1        | 54108  | 21.7062 | 22.4952 | 17.9268 | 18.1263 | -0.283  | 0.0022108 | 0.0101294 | Down-regulated |
| NM_152277    | UBTD2         | 92181  | 18.1367 | 17.5601 | 13.9663 | 15.1464 | -0.2831 | 0.0042269 | 0.0177253 | Down-regulated |
| NM_003922    | HERC1         | 8925   | 3.55576 | 3.93051 | 3.14086 | 2.96196 | -0.2839 | 0.0048225 | 0.0198467 | Down-regulated |
| NM_145730    | AP1B1         | 162    | 19.5077 | 20.1445 | 16.6039 | 15.7725 | -0.284  | 0.0002301 | 0.0013655 | Down-regulated |
| NM_014733    | ZFYVE16       | 9765   | 10.0346 | 9.96676 | 8.48538 | 7.831   | -0.2844 | 0.0006457 | 0.0034614 | Down-regulated |
| NM_015171    | XPO6          | 23214  | 37.4311 | 36.5019 | 30.9032 | 29.4818 | -0.2845 | 5.11E-07  | 4.95E-06  | Down-regulated |
| NM_001271641 | MTCH1         | 23787  | 53.3472 | 47.0389 | 40.7431 | 41.1125 | -0.2846 | 0.0008211 | 0.0042962 | Down-regulated |
| NM_004446    | EPRS          | 2058   | 39.8635 | 40.2951 | 32.1542 | 33.3316 | -0.2847 | 1.12E-08  | 1.32E-07  | Down-regulated |
| NM_015492    | C15orf39      | 56905  | 11.5881 | 11.4842 | 9.14585 | 9.65232 | -0.2848 | 0.0027256 | 0.0121365 | Down-regulated |
| NM_001144831 | PHB2          | 11331  | 155.062 | 142.939 | 122.485 | 120.69  | -0.285  | 5.01E-06  | 4.17E-05  | Down-regulated |
| NM_001010    | RPS6          | 6194   | 1352.49 | 1287.78 | 1048.01 | 1105.79 | -0.285  | 1.01E-09  | 1.33E-08  | Down-regulated |
| NM_014222    | NDUFA8        | 4702   | 75.8325 | 69.9947 | 61.3912 | 57.0782 | -0.2853 | 0.0107844 | 0.0394974 | Down-regulated |
| NM_015352    | POFUT1        | 23509  | 36.8259 | 35.7024 | 28.8471 | 30.3542 | -0.2857 | 2.07E-07  | 2.11E-06  | Down-regulated |
| NM_005471    | GNPDA1        | 10007  | 66.5587 | 65.2846 | 54.0687 | 53.5253 | -0.2858 | 3.11E-07  | 3.09E-06  | Down-regulated |
| NM_006305    | ANP32A        | 8125   | 85.508  | 80.4031 | 67.5184 | 67.8313 | -0.2858 | 3.01E-07  | 3.00E-06  | Down-regulated |
| NM_018230    | NUP133        | 55746  | 10.1593 | 10.3382 | 8.07675 | 8.58935 | -0.2858 | 0.0066006 | 0.0259982 | Down-regulated |
| NM_018332    | DDX19A        | 55308  | 18.476  | 20.0214 | 15.4872 | 15.8376 | -0.286  | 0.0029368 | 0.0129411 | Down-regulated |
| NM_001018    | RPS15         | 6209   | 2307.6  | 2086.69 | 1770.68 | 1802.72 | -0.2863 | 1.34E-06  | 1.22E-05  | Down-regulated |
| NM_003798    | CTNNA1        | 8727   | 16.3562 | 15.4281 | 13.2388 | 12.5813 | -0.2863 | 0.0110011 | 0.0401599 | Down-regulated |
| NM_182679    | GPATCH4       | 54865  | 35.2285 | 36.0468 | 28.8533 | 29.2182 | -0.2867 | 0.0002459 | 0.0014503 | Down-regulated |
| NM_182729    | TXNRD1        | 7296   | 29.8597 | 26.5868 | 23.5709 | 22.3832 | -0.2868 | 0.0007192 | 0.003816  | Down-regulated |
| NM_153812    | PHF13         | 148479 | 12.4596 | 13.3945 | 10.1725 | 10.8506 | -0.287  | 0.0070374 | 0.0274922 | Down-regulated |
| NR_033465    | NTSC3B        | 115024 | 58.4979 | 52.9877 | 44.7149 | 45.9826 | -0.2872 | 0.0008891 | 0.0046198 | Down-regulated |
| NM_006836    | GCN1          | 10985  | 33.4059 | 33.7865 | 27.8441 | 26.9528 | -0.2877 | 2.20E-11  | 3.42E-10  | Down-regulated |
| NM_023015    | INTS3         | 65123  | 16.7636 | 14.8922 | 12.4477 | 13.287  | -0.2879 | 0.0021159 | 0.0097675 | Down-regulated |
| NM_006254    | PRKCD         | 5580   | 27.4714 | 29.4072 | 23.1595 | 23.124  | -0.2879 | 0.0003682 | 0.0020909 | Down-regulated |
| NM_203290    | POLR1C        | 9533   | 36.1518 | 35.6163 | 29.1956 | 29.0565 | -0.288  | 0.0055944 | 0.0225941 | Down-regulated |
| NM_001163424 | COPS9         | 150678 | 294.92  | 272.401 | 228.148 | 230.38  | -0.288  | 0.005627  | 0.0227065 | Down-regulated |
| NM_001030009 | RPS15A        | 6210   | 1781.75 | 1601.28 | 1372.06 | 1372.2  | -0.288  | 8.95E-06  | 7.11E-05  | Down-regulated |
| NM_004232    | SOC6          | 9306   | 7.71189 | 7.2292  | 5.91023 | 6.22656 | -0.2881 | 0.0065612 | 0.025859  | Down-regulated |
| NM_000666    | ACY1          | 95     | 42.671  | 38.7151 | 32.7442 | 33.3576 | -0.2886 | 0.002597  | 0.0116509 | Down-regulated |
| NM_014235    | UBL4A         | 8266   | 32.0723 | 32.3606 | 26.4863 | 25.9025 | -0.2894 | 0.0001876 | 0.0011355 | Down-regulated |
| NM_138431    | MFSD3         | 113655 | 30.1157 | 30.7303 | 24.2537 | 25.1    | -0.2895 | 0.0049555 | 0.0203272 | Down-regulated |
| NM_012318    | LETM1         | 3954   | 14.2478 | 15.5604 | 11.8083 | 12.4143 | -0.2896 | 0.0007491 | 0.0039646 | Down-regulated |
| NM_000693    | ALDH1A3       | 220    | 44.8876 | 42.0076 | 35.5521 | 35.1359 | -0.2902 | 2.36E-06  | 2.07E-05  | Down-regulated |
| NM_017905    | TMCO3         | 55002  | 16.0891 | 15.7651 | 12.6455 | 13.2074 | -0.2903 | 0.0029685 | 0.0130477 | Down-regulated |
| NM_002265    | KPNB1         | 3837   | 97.3413 | 93.8934 | 79.0902 | 76.561  | -0.2905 | 5.15E-12  | 8.44E-11  | Down-regulated |
| NM_014681    | DHX34         | 9704   | 11.8911 | 11.3105 | 9.69163 | 9.12753 | -0.2908 | 0.0032984 | 0.0142973 | Down-regulated |
| NM_004450    | rosophila)(ER | 2079   | 430.722 | 390.314 | 333.896 | 332.712 | -0.2908 | 7.34E-06  | 5.94E-05  | Down-regulated |
| NM_024086    | METTL16       | 79066  | 12.8082 | 13.4867 | 10.7795 | 10.5733 | -0.2908 | 0.0002276 | 0.0013515 | Down-regulated |
| NM_017971    | MRPL20        | 55052  | 139.495 | 136.512 | 108.248 | 115.368 | -0.291  | 0.0007724 | 0.004077  | Down-regulated |
| NM_006640    | 9-Sep         | 10801  | 77.4513 | 70.8256 | 62.9953 | 57.4929 | -0.291  | 2.57E-05  | 0.0001868 | Down-regulated |
| NM_000895    | LTA4H         | 4048   | 19.9724 | 21.4608 | 16.2821 | 17.2669 | -0.2913 | 0.008088  | 0.0309942 | Down-regulated |
| NM_001077397 | IRF2BP2       | 359948 | 11.3793 | 10.9858 | 9.14155 | 9.00297 | -0.2916 | 0.0017249 | 0.0082004 | Down-regulated |
| NM_001014812 | FAM96A        | 84191  | 70.7101 | 66.0351 | 53.3896 | 57.2913 | -0.2917 | 0.0032784 | 0.0142171 | Down-regulated |
| NM_001001973 | ATP5C1        | 509    | 58.2662 | 53.9243 | 45.5222 | 45.3708 | -0.2918 | 0.00268   | 0.0119697 | Down-regulated |
| NM_016297    | PCYOX1        | 51449  | 13.5539 | 13.9661 | 11.169  | 11.1688 | -0.2919 | 0.0001407 | 0.0008798 | Down-regulated |
| NM_000972    | RPL7A         | 6130   | 1157.46 | 1092.32 | 913.663 | 913.399 | -0.292  | 1.92E-12  | 3.28E-11  | Down-regulated |
| NM_057175    | 15, NatA au   | 80155  | 10.4992 | 11.167  | 8.53214 | 9.04106 | -0.2921 | 0.001587  | 0.0076247 | Down-regulated |
| NM_024098    | CCDC86        | 79080  | 43.6801 | 45.3402 | 35.8471 | 36.4372 | -0.2922 | 8.54E-05  | 0.0005565 | Down-regulated |
| NM_016207    | CPSF3         | 51692  | 21.5103 | 23.3636 | 18.8282 | 17.502  | -0.2923 | 0.0057928 | 0.0232258 | Down-regulated |
| NM_006802    | SF3A3         | 10946  | 41.1354 | 39.3255 | 33.6488 | 31.6367 | -0.2926 | 3.66E-05  | 0.000257  | Down-regulated |
| NM_033198    | PIGS          | 94005  | 32.6695 | 33.0145 | 27.2638 | 26.0147 | -0.293  | 4.29E-05  | 0.0002973 | Down-regulated |
| NM_005877    | SF3A1         | 10291  | 27.4001 | 27.8669 | 22.9643 | 21.9126 | -0.2933 | 8.09E-07  | 7.63E-06  | Down-regulated |
| NM_001379    | DNMT1         | 1786   | 21.6038 | 24.0745 | 20.0693 | 16.8666 | -0.2944 | 0.0059335 | 0.0237087 | Down-regulated |
| NM_013337    | TIMM22        | 29928  | 32.3079 | 29.9566 | 25.1587 | 25.2072 | -0.2952 | 0.0019907 | 0.0092591 | Down-regulated |
| NM_007007    | CPSF6         | 11052  | 11.5443 | 11.0429 | 9.1045  | 9.1936  | -0.2953 | 0.0001303 | 0.0008206 | Down-regulated |
| NM_004553    | NDUFS6        | 4726   | 566.022 | 548.691 | 438.937 | 461.8   | -0.2953 | 1.49E-06  | 1.35E-05  | Down-regulated |



|              |                |        |         |         |         |         |         |           |           |                |
|--------------|----------------|--------|---------|---------|---------|---------|---------|-----------|-----------|----------------|
| NM_025232    | REEP4          | 80346  | 28.4983 | 30.782  | 23.8126 | 24.0364 | -0.2957 | 0.0049126 | 0.0201903 | Down-regulated |
| NM_021970    | LAMTOR3        | 8649   | 7.79648 | 8.21493 | 6.27487 | 6.64709 | -0.2957 | 0.0135385 | 0.0478151 | Down-regulated |
| NM_001012478 | U2AF2          | 11338  | 101.326 | 97.8321 | 79.5048 | 81.9498 | -0.296  | 4.54E-11  | 6.90E-10  | Down-regulated |
| NM_016101    | NIP7           | 51388  | 20.7901 | 21.0423 | 17.059  | 16.7211 | -0.2962 | 0.0026965 | 0.0120268 | Down-regulated |
| NM_012235    | SCAP           | 22937  | 11.8129 | 12.9971 | 10.5111 | 9.51207 | -0.2965 | 0.0075926 | 0.0293906 | Down-regulated |
| NM_014976    | PDCD11         | 22984  | 19.4753 | 19.6781 | 15.6777 | 16.0357 | -0.2968 | 4.53E-07  | 4.40E-06  | Down-regulated |
| NM_007236    | CHP1           | 11261  | 34.7894 | 34.7376 | 29.1962 | 27.0476 | -0.2968 | 3.06E-05  | 0.0002184 | Down-regulated |
| NM_006431    | CCT2           | 10576  | 143.471 | 142.116 | 112.759 | 118.542 | -0.297  | 9.45E-10  | 1.26E-08  | Down-regulated |
| NM_016732    | RALY           | 22913  | 59.9022 | 57.3404 | 48.1651 | 46.7894 | -0.2974 | 4.21E-10  | 5.83E-09  | Down-regulated |
| NM_003820    | TNFRSF14       | 8764   | 55.8557 | 59.9444 | 47.3516 | 46.3899 | -0.2974 | 5.50E-07  | 5.30E-06  | Down-regulated |
| NM_001008395 | LAMTOR4        | 389541 | 119.654 | 127.508 | 99.0378 | 99.7482 | -0.2976 | 0.0041639 | 0.0174857 | Down-regulated |
| NM_003051    | SLC16A1        | 6566   | 25.6968 | 25.2296 | 20.2272 | 20.9715 | -0.2978 | 1.13E-05  | 8.82E-05  | Down-regulated |
| NM_021974    | POLR2F         | 5435   | 69.8042 | 64.3868 | 55.6646 | 52.7866 | -0.298  | 3.97E-05  | 0.0002771 | Down-regulated |
| NM_015670    | SEN3           | 26168  | 72.427  | 69.1771 | 56.8097 | 57.7507 | -0.2981 | 9.30E-08  | 9.87E-07  | Down-regulated |
| NM_021100    | NFS1           | 9054   | 19.7702 | 20.7975 | 17.0305 | 15.6858 | -0.2981 | 0.0056057 | 0.0226252 | Down-regulated |
| NM_003953    | MPZL1          | 9019   | 11.0694 | 11.6403 | 9.14207 | 9.20141 | -0.2983 | 0.0009323 | 0.0048068 | Down-regulated |
| NM_000362    | TIMP3          | 7078   | 31.9674 | 31.5601 | 25.4886 | 25.9144 | -0.2985 | 3.75E-09  | 4.66E-08  | Down-regulated |
| NM_002295    | RPSA           | 3921   | 1497.23 | 1439.12 | 1183.68 | 1191.49 | -0.2987 | 3.02E-19  | 8.51E-18  | Down-regulated |
| NM_018313    | PBRM1          | 55193  | 4.83807 | 4.44428 | 3.7391  | 3.73155 | -0.2988 | 0.0111638 | 0.0406687 | Down-regulated |
| NM_007051    | FAF1           | 11124  | 34.7563 | 33.9843 | 27.0743 | 28.4315 | -0.299  | 6.33E-05  | 0.0004242 | Down-regulated |
| NM_003124    | in:NADP+ ox    | 6697   | 44.3204 | 41.4211 | 35.0347 | 34.0774 | -0.2993 | 0.0017666 | 0.0083633 | Down-regulated |
| NM_030969    | TMEM14B        | 81853  | 68.089  | 61.5731 | 48.975  | 55.2585 | -0.2995 | 0.0124089 | 0.0444745 | Down-regulated |
| NM_017953    | ZNHIT6         | 54680  | 6.9934  | 7.15272 | 5.63702 | 5.76488 | -0.2995 | 0.0027942 | 0.0124073 | Down-regulated |
| NM_007274    | ACOT7          | 11332  | 42.9264 | 44.0169 | 37.0981 | 33.0015 | -0.2995 | 0.0015168 | 0.0073381 | Down-regulated |
| NM_015397    | DCAF12         | 25853  | 10.5041 | 10.0576 | 8.06077 | 8.49192 | -0.2997 | 0.0082432 | 0.0314691 | Down-regulated |
| NM_201525    | ADGRG1         | 9289   | 107.689 | 105.265 | 89.0224 | 83.1515 | -0.2997 | 6.39E-10  | 8.62E-09  | Down-regulated |
| NM_005153    | USP10          | 9100   | 22.4486 | 22.1226 | 19.2426 | 16.6693 | -0.2999 | 0.0025997 | 0.01166   | Down-regulated |
| NR_038343    | MAGI2-AS3      | 1E+08  | 4.34211 | 4.33312 | 3.58527 | 3.39668 | -0.3005 | 0.006652  | 0.0261684 | Down-regulated |
| NM_017831    | RNF125         | 54941  | 20.2715 | 20.7178 | 16.8786 | 16.2175 | -0.3011 | 1.59E-06  | 1.43E-05  | Down-regulated |
| NM_001040431 | COA3           | 28958  | 120.24  | 109.727 | 86.2236 | 98.495  | -0.3012 | 0.0063552 | 0.0251561 | Down-regulated |
| NM_014680    | KIAA0100       | 9703   | 42.491  | 42.7047 | 34.9432 | 33.8817 | -0.3013 | 2.79E-13  | 5.15E-12  | Down-regulated |
| NM_001527    | HDAC2          | 3066   | 14.4709 | 13.6065 | 11.3189 | 11.3281 | -0.3016 | 2.98E-05  | 0.0002135 | Down-regulated |
| NM_005529    | HSPG2          | 3339   | 27.3825 | 28.9262 | 22.5519 | 22.9298 | -0.3016 | 2.97E-11  | 4.58E-10  | Down-regulated |
| NM_138635    | H2AFV          | 94239  | 9.55634 | 9.68019 | 8.04028 | 7.42044 | -0.3021 | 0.01031   | 0.0380222 | Down-regulated |
| NM_006590    | USP39          | 10713  | 29.4755 | 28.4645 | 24.3903 | 22.2145 | -0.3025 | 0.0013855 | 0.0068108 | Down-regulated |
| NM_000852    | GSTP1          | 2950   | 1223.79 | 1128.56 | 944.326 | 951.564 | -0.3027 | 5.41E-10  | 7.36E-09  | Down-regulated |
| NM_020443    | NAV1           | 89796  | 6.25921 | 7.26729 | 5.70831 | 5.16183 | -0.3032 | 0.0043328 | 0.0181018 | Down-regulated |
| NM_003758    | EIF3J          | 8669   | 34.1421 | 30.297  | 25.767  | 26.0454 | -0.3034 | 0.0009884 | 0.0050588 | Down-regulated |
| NM_015097    | CLASP2         | 23122  | 6.79686 | 7.97162 | 5.84342 | 6.0134  | -0.3035 | 0.0094183 | 0.0351752 | Down-regulated |
| NM_000968    | RPL4           | 6124   | 1344.06 | 1278.25 | 1024.14 | 1089.44 | -0.3036 | 7.66E-11  | 1.14E-09  | Down-regulated |
| NM_006833    | COPS6          | 10980  | 121.631 | 123.83  | 99.7459 | 98.0074 | -0.3038 | 3.60E-08  | 4.00E-07  | Down-regulated |
| NM_024658    | IPO4           | 79711  | 19.3924 | 20.3913 | 16.3282 | 15.6699 | -0.3041 | 0.0002792 | 0.00163   | Down-regulated |
| NM_002128    | HMGB1          | 3146   | 126.426 | 122.01  | 98.6773 | 101.667 | -0.3041 | 6.00E-15  | 1.27E-13  | Down-regulated |
| NM_003187    | TAF9           | 6880   | 44.1382 | 40.045  | 33.5314 | 33.9705 | -0.3046 | 0.0066437 | 0.0261413 | Down-regulated |
| NM_021078    | KAT2A          | 2648   | 44.8687 | 48.9528 | 38.1575 | 37.3644 | -0.3046 | 1.34E-05  | 0.0001026 | Down-regulated |
| NM_001123377 | PARK7          | 11315  | 263.622 | 249.968 | 203.552 | 209.578 | -0.3048 | 2.23E-07  | 2.26E-06  | Down-regulated |
| NM_002764    | PRPS1          | 5631   | 35.1886 | 33.884  | 27.4737 | 28.0794 | -0.3048 | 0.000172  | 0.0010505 | Down-regulated |
| NM_005628    | SLC1A5         | 6510   | 161.705 | 156.749 | 134.043 | 122.343 | -0.3051 | 6.40E-08  | 6.91E-07  | Down-regulated |
| NM_002355    | M6PR           | 4074   | 45.7364 | 41.958  | 34.048  | 36.4593 | -0.3052 | 0.0001482 | 0.0009214 | Down-regulated |
| NM_005804    | DDX39A         | 10212  | 107.445 | 96.6896 | 82.0326 | 82.0658 | -0.3053 | 4.24E-05  | 0.0002938 | Down-regulated |
| NM_001101    | ACTB           | 60     | 1555.34 | 1532.76 | 1238.84 | 1249.06 | -0.3053 | 6.34E-33  | 3.37E-31  | Down-regulated |
| NM_001017980 | revisiae)(VM   | 203547 | 10.5538 | 11.0659 | 8.53633 | 8.82882 | -0.3055 | 0.0014446 | 0.0070551 | Down-regulated |
| NM_148172    | PEMT           | 10400  | 43.7394 | 45.8062 | 37.1374 | 34.4738 | -0.3055 | 0.0108185 | 0.0395842 | Down-regulated |
| NM_001199699 | DHX33          | 56919  | 10.8984 | 11.6983 | 8.31735 | 9.79264 | -0.3056 | 0.0076849 | 0.0296698 | Down-regulated |
| NM_001330058 | RAP1GAP2       | 23108  | 9.07872 | 8.06077 | 6.53465 | 7.21048 | -0.3057 | 0.0058905 | 0.0235658 | Down-regulated |
| NM_005993    | TBCD           | 6904   | 22.1631 | 22.0657 | 18.8944 | 16.6498 | -0.306  | 0.0004418 | 0.0024654 | Down-regulated |
| NM_012325    | MAPRE1         | 22919  | 119.937 | 114.396 | 92.7424 | 95.8652 | -0.3061 | 2.44E-10  | 3.48E-09  | Down-regulated |
| NM_004096    | EIF4EBP2       | 1979   | 13.0461 | 12.2943 | 9.95209 | 10.4184 | -0.3064 | 3.37E-05  | 0.000239  | Down-regulated |
| NM_017620    | ILF3           | 3609   | 19.6012 | 21.7766 | 17.4035 | 15.8193 | -0.3065 | 0.0004389 | 0.0024515 | Down-regulated |
| NM_002375    | MAP4           | 4134   | 77.1013 | 78.6593 | 62.7751 | 62.5716 | -0.3073 | 5.14E-19  | 1.42E-17  | Down-regulated |
| NM_015146    | 8-Sep          | 23176  | 14.8148 | 13.4347 | 10.9181 | 11.7391 | -0.3073 | 0.002194  | 0.0100675 | Down-regulated |
| NM_001286086 | C11orf98       | 1E+08  | 102.992 | 103.526 | 81.6881 | 83.2783 | -0.3073 | 0.0036054 | 0.0154771 | Down-regulated |
| NM_001002027 | unit 9)(ATP5   | 516    | 367.227 | 336.411 | 283.484 | 280.204 | -0.3074 | 5.27E-05  | 0.0003599 | Down-regulated |
| NM_004398    | DDX10          | 1662   | 11.073  | 10.649  | 8.66064 | 8.73661 | -0.3074 | 0.0076652 | 0.0296056 | Down-regulated |
| NM_138394    | HNRNPPL        | 92906  | 11.6077 | 12.0727 | 9.01475 | 9.91302 | -0.3075 | 0.0123241 | 0.0442209 | Down-regulated |
| NM_015175    | NBEAL2         | 23218  | 5.43406 | 5.83863 | 4.58068 | 4.45813 | -0.3077 | 0.0019008 | 0.0088973 | Down-regulated |
| NM_020401    | NUP107         | 57122  | 7.1148  | 6.92955 | 5.81334 | 5.43664 | -0.3078 | 0.0031116 | 0.0135738 | Down-regulated |
| NM_006048    | UBE4B          | 10277  | 29.0336 | 28.6085 | 23.4085 | 22.9312 | -0.3078 | 8.11E-09  | 9.71E-08  | Down-regulated |
| NM_053275    | RPLP0          | 6175   | 993.948 | 908.124 | 761.049 | 766.511 | -0.3082 | 1.67E-09  | 2.16E-08  | Down-regulated |
| NM_004300    | ACP1           | 52     | 73.1077 | 65.7009 | 55.4998 | 55.739  | -0.309  | 0.0002156 | 0.0012887 | Down-regulated |
| NM_021821    | MRPS35         | 60488  | 66.0959 | 61.6559 | 51.201  | 51.2748 | -0.3091 | 1.02E-05  | 8.02E-05  | Down-regulated |
| NM_002940    | ABCE1          | 6059   | 24.6699 | 25.4543 | 19.0349 | 21.1522 | -0.3094 | 0.0001296 | 0.0008165 | Down-regulated |
| NR_002599    | SNHG6          | 641638 | 888.574 | 790.564 | 694.388 | 646.312 | -0.3095 | 0.0001438 | 0.000897  | Down-regulated |
| NM_058163    | TSR2           | 90121  | 12.5748 | 11.387  | 9.39754 | 9.76303 | -0.3098 | 0.00359   | 0.0154177 | Down-regulated |
| NM_003653    | COPS3          | 8533   | 34.8978 | 33.772  | 24.8848 | 29.9552 | -0.3102 | 0.0098238 | 0.03644   | Down-regulated |
| NM_173157    | NR4A1          | 3164   | 151.076 | 145.655 | 124.014 | 114.023 | -0.3102 | 4.04E-08  | 4.47E-07  | Down-regulated |
| NM_174908    | CCDC50         | 152137 | 10.7607 | 10.72   | 8.28381 | 8.93653 | -0.3105 | 3.68E-05  | 0.0002582 | Down-regulated |
| NM_080594    | RNPS1          | 10921  | 30.5707 | 26.5614 | 23.0738 | 22.5873 | -0.3106 | 0.0037982 | 0.0161883 | Down-regulated |
| NM_003680    | YARS           | 8565   | 51.1333 | 48.1815 | 40.3271 | 39.2996 | -0.3107 | 4.50E-07  | 4.38E-06  | Down-regulated |
| NM_016630    | sive, Mast sy: | 51324  | 62.3751 | 61.217  | 48.6999 | 50.2815 | -0.3115 | 2.91E-06  | 2.51E-05  | Down-regulated |
| NM_014808    | FARP2          | 9855   | 9.182   | 10.0235 | 7.3765  | 7.94811 | -0.3117 | 0.0095392 | 0.0355503 | Down-regulated |
| NM_000969    | RPL5           | 6125   | 896.398 | 823.48  | 683.595 | 693.887 | -0.3117 | 1.10E-09  | 1.45E-08  | Down-regulated |
| NM_024513    | FYCO1          | 79443  | 14.9029 | 15.5025 | 12.5192 | 11.839  | -0.312  | 1.75E-06  | 1.57E-05  | Down-regulated |
| NM_003418    | CNBP           | 7555   | 34.344  | 29.249  | 24.9016 | 25.895  | -0.3121 | 0.0014261 | 0.0069723 | Down-regulated |

|              |                  |        |         |         |         |         |         |           |           |                |
|--------------|------------------|--------|---------|---------|---------|---------|---------|-----------|-----------|----------------|
| NM_014028    | OSTM1            | 28962  | 45.4634 | 42.5495 | 34.2646 | 36.22   | -0.3125 | 4.60E-07  | 4.47E-06  | Down-regulated |
| NM_024911    | WLS              | 79971  | 19.6892 | 21.5568 | 16.4678 | 16.4694 | -0.3126 | 0.0014942 | 0.0072434 | Down-regulated |
| NM_001078645 | CDC16            | 8881   | 40.7867 | 35.2393 | 29.5614 | 31.1734 | -0.3126 | 0.0017709 | 0.0083754 | Down-regulated |
| NM_015123    | FRMD4B           | 23150  | 7.64667 | 8.29353 | 6.3087  | 6.42586 | -0.3128 | 0.0015913 | 0.0076395 | Down-regulated |
| NM_024068    | NABP2            | 79035  | 43.1783 | 43.1795 | 35.3616 | 33.5919 | -0.3129 | 0.0009505 | 0.0048912 | Down-regulated |
| NM_004313    | ARRB2            | 409    | 27.2628 | 28.7414 | 22.4255 | 22.2787 | -0.313  | 0.0014104 | 0.0069098 | Down-regulated |
| NM_001083614 | EARS2            | 124454 | 9.53894 | 9.75988 | 7.18294 | 8.19863 | -0.3133 | 0.0113256 | 0.0411562 | Down-regulated |
| NM_003074    | SMARCC1          | 6599   | 50.0428 | 50.4109 | 38.6367 | 41.783  | -0.3137 | 6.79E-09  | 8.25E-08  | Down-regulated |
| NM_001135673 | ATL2             | 64225  | 10.1643 | 9.69986 | 8.15836 | 7.67787 | -0.3137 | 0.005235  | 0.0213546 | Down-regulated |
| NM_024519    | FAM65A           | 79567  | 30.8336 | 30.8627 | 25.7719 | 23.554  | -0.3139 | 1.03E-05  | 8.12E-05  | Down-regulated |
| NM_015140    | TTL12            | 23170  | 32.5045 | 32.4357 | 26.4327 | 25.5076 | -0.3142 | 1.32E-06  | 1.21E-05  | Down-regulated |
| NM_001270362 | RAD23A           | 5886   | 41.9642 | 40.8121 | 34.1901 | 31.9125 | -0.3146 | 0.0002558 | 0.0015044 | Down-regulated |
| NM_001077399 | PNKD             | 25953  | 83.9121 | 78.5494 | 62.703  | 66.4702 | -0.3148 | 0.0050458 | 0.0206665 | Down-regulated |
| NM_007175    | ERLIN2           | 11160  | 13.6153 | 13.6924 | 10.2384 | 11.5454 | -0.3149 | 0.0011077 | 0.0055857 | Down-regulated |
| NM_004839    | HOMER2           | 9455   | 18.6452 | 18.8311 | 14.2702 | 15.515  | -0.315  | 0.0097328 | 0.0361568 | Down-regulated |
| NM_001687    | ATP5D            | 513    | 49.5129 | 49.1328 | 38.3326 | 40.1041 | -0.3152 | 0.0046592 | 0.0192683 | Down-regulated |
| NM_006371    | CRTAP            | 10491  | 86.7141 | 87.2709 | 70.7738 | 68.4662 | -0.3153 | 6.04E-19  | 1.65E-17  | Down-regulated |
| NM_004499    | HNRNPAB          | 3182   | 61.1255 | 52.1562 | 49.1636 | 40.8177 | -0.3153 | 0.0128807 | 0.0458427 | Down-regulated |
| NM_006756    | TCEA1            | 6917   | 39.8755 | 39.8232 | 30.7918 | 32.8585 | -0.3157 | 5.49E-06  | 4.55E-05  | Down-regulated |
| NM_021134    | MRPL23           | 6150   | 326.202 | 285.399 | 250.401 | 236.669 | -0.3162 | 0.0002198 | 0.0013113 | Down-regulated |
| NM_015704    | DESI1            | 27351  | 21.4014 | 20.4577 | 17.1312 | 16.2538 | -0.3168 | 7.72E-05  | 0.0005083 | Down-regulated |
| NM_032390    | NIFK             | 84365  | 24.9546 | 23.5082 | 20.0784 | 18.3888 | -0.3173 | 0.0076982 | 0.029703  | Down-regulated |
| NM_000182    | tein), alpha s   | 3030   | 140.221 | 135.453 | 109.12  | 111.088 | -0.3174 | 1.43E-15  | 3.18E-14  | Down-regulated |
| NM_002765    | PRPS2            | 5634   | 13.1353 | 13.3863 | 10.2765 | 10.7661 | -0.3177 | 0.0090378 | 0.0339532 | Down-regulated |
| NM_022915    | MRPL44           | 65080  | 39.0458 | 40.3299 | 31.7635 | 31.4669 | -0.3177 | 0.0001858 | 0.001125  | Down-regulated |
| NM_000097    | CPOX             | 1371   | 90.4397 | 90.4892 | 71.9573 | 72.4806 | -0.3178 | 6.78E-13  | 1.21E-11  | Down-regulated |
| NM_007355    | HSP90AB1         | 3326   | 977.912 | 976.895 | 773.046 | 788.618 | -0.3178 | 2.92E-33  | 1.56E-31  | Down-regulated |
| NM_000108    | DLI              | 1738   | 45.0253 | 42.0709 | 33.9711 | 35.506  | -0.3179 | 9.28E-07  | 8.65E-06  | Down-regulated |
| NM_002710    | PPP1CC           | 5501   | 49.1167 | 50.0188 | 37.8752 | 41.1525 | -0.3179 | 8.45E-06  | 6.75E-05  | Down-regulated |
| NM_001134231 | NTSDC2           | 64943  | 107.348 | 111.281 | 88.5917 | 85.8251 | -0.3181 | 6.45E-09  | 7.84E-08  | Down-regulated |
| NM_018238    | AGK              | 55750  | 19.0059 | 19.8173 | 15.3375 | 15.5636 | -0.3181 | 0.0005182 | 0.0028368 | Down-regulated |
| NM_003819    | tein cytoplasmic | 8761   | 25.8585 | 23.4131 | 20.3157 | 18.8665 | -0.3194 | 0.0006743 | 0.0035979 | Down-regulated |
| NM_015250    | BICD2            | 23299  | 9.88293 | 10.4165 | 8.32997 | 7.79027 | -0.32   | 0.0021766 | 0.0099957 | Down-regulated |
| NM_004077    | CS               | 1431   | 67.0786 | 67.2495 | 53.2727 | 53.8006 | -0.3201 | 3.39E-11  | 5.21E-10  | Down-regulated |
| NM_001128228 | TPRN             | 286262 | 25.0531 | 25.8882 | 20.6264 | 19.8637 | -0.3205 | 0.0001774 | 0.0010803 | Down-regulated |
| NM_021244    | RRAGD            | 58528  | 13.1113 | 11.5977 | 10.01   | 9.60907 | -0.3205 | 0.0018443 | 0.0086602 | Down-regulated |
| NM_001025071 | RPS14            | 6208   | 65.2228 | 67.3576 | 51.205  | 53.7034 | -0.3208 | 0.0056525 | 0.0227855 | Down-regulated |
| NM_006556    | PMVK             | 10654  | 41.397  | 39.9937 | 31.9855 | 32.5987 | -0.321  | 0.0016498 | 0.0078765 | Down-regulated |
| NM_018129    | PNPO             | 55163  | 11.6196 | 11.7888 | 9.05431 | 9.52073 | -0.321  | 0.0030972 | 0.0135265 | Down-regulated |
| NM_022754    | SFXN1            | 94081  | 16.2248 | 15.475  | 12.2804 | 12.9238 | -0.3211 | 0.0002261 | 0.0013436 | Down-regulated |
| NM_006234    | POLR2J           | 5439   | 100.851 | 95.112  | 79.8825 | 75.6504 | -0.3214 | 0.0001643 | 0.0010095 | Down-regulated |
| NM_006758    | U2AF1            | 7307   | 108.813 | 94.9782 | 82.4684 | 79.1373 | -0.3217 | 0.0014561 | 0.0070918 | Down-regulated |
| NM_001288732 | TEX2             | 55852  | 16.5386 | 15.572  | 12.1442 | 13.3559 | -0.3219 | 0.0002345 | 0.00139   | Down-regulated |
| NM_018396    | METTL2B          | 55798  | 18.2833 | 16.9191 | 13.7305 | 14.1377 | -0.3222 | 0.0066371 | 0.026126  | Down-regulated |
| NM_004426    | PHC1             | 1911   | 18.2499 | 16.7556 | 13.5688 | 14.2482 | -0.3224 | 7.89E-05  | 0.0005189 | Down-regulated |
| NM_001300946 | GATAD2A          | 54815  | 28.0272 | 26.6543 | 22.0273 | 21.4557 | -0.3233 | 7.27E-08  | 7.79E-07  | Down-regulated |
| NM_000411    | HLCS             | 3141   | 4.77035 | 4.79039 | 3.86298 | 3.67994 | -0.3233 | 0.0108885 | 0.0398024 | Down-regulated |
| NM_007235    | XPOT             | 11260  | 48.5599 | 47.2405 | 37.5465 | 38.6281 | -0.3235 | 4.31E-10  | 5.94E-09  | Down-regulated |
| NM_001174101 | PRR7             | 80758  | 63.1685 | 64.001  | 51.9445 | 48.953  | -0.3237 | 5.18E-05  | 0.000354  | Down-regulated |
| NM_032826    | SLC35B4          | 84912  | 10.7796 | 11.0333 | 8.89326 | 8.42765 | -0.3237 | 4.87E-05  | 0.0003342 | Down-regulated |
| NM_000269    | NME1             | 4830   | 527.776 | 488.916 | 405.858 | 400.976 | -0.3239 | 4.91E-09  | 6.05E-08  | Down-regulated |
| NM_007209    | RPL35            | 11224  | 4402.83 | 4040.57 | 3405.78 | 3273.68 | -0.3243 | 2.54E-09  | 3.22E-08  | Down-regulated |
| NM_003659    | AGPS             | 8540   | 7.6904  | 7.47957 | 5.99691 | 6.03514 | -0.3245 | 0.0001605 | 0.0009887 | Down-regulated |
| NM_199287    | CCDC137          | 339230 | 39.7344 | 39.2823 | 31.7705 | 30.9209 | -0.3246 | 1.83E-05  | 0.0001364 | Down-regulated |
| NM_004891    | MRPL33           | 9553   | 113.981 | 116.994 | 91.3487 | 90.4381 | -0.3252 | 0.0107601 | 0.0394233 | Down-regulated |
| NM_024792    | FAM57A           | 79850  | 31.6588 | 31.457  | 26.0112 | 23.9385 | -0.326  | 0.000221  | 0.0013175 | Down-regulated |
| NM_017906    | PAK1IP1          | 55003  | 30.1244 | 29.0269 | 23.5019 | 23.1699 | -0.3268 | 0.0029387 | 0.0129457 | Down-regulated |
| NM_014811    | PPP1R26          | 9858   | 7.19999 | 7.06941 | 5.50024 | 5.758   | -0.3268 | 0.0044402 | 0.0184793 | Down-regulated |
| NM_000100    | CSTB             | 1476   | 580.622 | 547.007 | 445.042 | 448.73  | -0.3268 | 2.29E-12  | 3.86E-11  | Down-regulated |
| NM_016436    | PHF20            | 51230  | 13.5691 | 13.1858 | 10.5896 | 10.6163 | -0.3269 | 1.06E-05  | 8.31E-05  | Down-regulated |
| NM_002134    | HMOX2            | 3163   | 38.6746 | 41.5794 | 30.6927 | 32.7429 | -0.328  | 0.0005513 | 0.003001  | Down-regulated |
| NM_004965    | HMGN1            | 3150   | 162.382 | 151.848 | 125.164 | 123.571 | -0.3284 | 4.93E-08  | 5.41E-07  | Down-regulated |
| NM_014216    | ITPK1            | 3705   | 41.5766 | 40.6736 | 32.3623 | 32.7842 | -0.3286 | 1.14E-08  | 1.34E-07  | Down-regulated |
| NM_032360    | ACBD6            | 84320  | 22.8629 | 21.0668 | 17.2874 | 17.3148 | -0.3286 | 0.0094793 | 0.0353821 | Down-regulated |
| NM_032236    | USP48            | 84196  | 38.8161 | 40.6384 | 30.6562 | 32.2539 | -0.3288 | 6.71E-08  | 7.23E-07  | Down-regulated |
| NM_015420    | DCAF13           | 25879  | 24.3344 | 23.5191 | 18.4604 | 19.3339 | -0.329  | 0.0002042 | 0.0012275 | Down-regulated |
| NM_001982    | ERBB3            | 2065   | 52.763  | 56.1173 | 43.3253 | 42.932  | -0.329  | 4.75E-11  | 7.20E-10  | Down-regulated |
| NM_153000    | APCDD1           | 147495 | 13.276  | 14.2873 | 11.2081 | 10.4865 | -0.3293 | 0.0084801 | 0.0322446 | Down-regulated |
| NM_024805    | utative)(RBF.    | 79863  | 5.77261 | 6.48583 | 5.03657 | 4.59984 | -0.3296 | 0.0128059 | 0.0456413 | Down-regulated |
| NM_003677    | DENR             | 8562   | 42.4878 | 41.7578 | 32.95   | 33.6782 | -0.3298 | 2.26E-07  | 2.29E-06  | Down-regulated |
| NM_018361    | AGPAT5           | 55326  | 9.31855 | 9.54214 | 7.2695  | 7.61802 | -0.3304 | 0.0004498 | 0.0025051 | Down-regulated |
| NM_004329    | BMPR1A           | 657    | 8.13452 | 8.5373  | 6.53445 | 6.5844  | -0.3306 | 0.0089938 | 0.0338344 | Down-regulated |
| NM_031937    | TBC1D10A         | 83874  | 16.6447 | 15.9583 | 12.5574 | 13.0858 | -0.3307 | 0.009114  | 0.0342191 | Down-regulated |
| NM_138639    | BCL2L12          | 83596  | 23.8256 | 23.1512 | 19.1681 | 17.8336 | -0.3309 | 0.0031169 | 0.0135845 | Down-regulated |
| NM_004804    | CIAO1            | 9391   | 71.1426 | 68.1837 | 56.0107 | 54.175  | -0.3314 | 6.09E-12  | 9.94E-11  | Down-regulated |
| NM_001105573 | FBXO45           | 200933 | 5.89842 | 6.37589 | 4.79673 | 4.8631  | -0.3317 | 0.0051716 | 0.0211276 | Down-regulated |
| NM_024299    | PPDPF            | 79144  | 341.383 | 305.426 | 265.662 | 243.943 | -0.3321 | 4.50E-05  | 0.0003102 | Down-regulated |
| NM_016065    | MRPS16           | 51021  | 36.7129 | 33.9652 | 29.4285 | 26.2724 | -0.3323 | 0.0003482 | 0.0019895 | Down-regulated |
| NM_153718    | NUP62            | 23636  | 25.4311 | 26.2273 | 18.9706 | 21.7085 | -0.3327 | 0.0004742 | 0.0026294 | Down-regulated |
| NM_002695    | POLR2E           | 5434   | 86.0789 | 81.5326 | 66.7194 | 65.7062 | -0.3328 | 1.26E-10  | 1.84E-09  | Down-regulated |
| NM_001377    | DYNC2HI          | 79659  | 1.87392 | 1.92855 | 1.52516 | 1.45701 | -0.3331 | 0.0120659 | 0.043433  | Down-regulated |
| NM_013302    | EEF2K            | 29904  | 7.14606 | 7.91255 | 6.16952 | 5.68262 | -0.3333 | 0.0017689 | 0.0083698 | Down-regulated |
| NM_152522    | ARL6IP6          | 151188 | 9.3534  | 9.72011 | 7.54981 | 7.40714 | -0.334  | 0.0137099 | 0.0483314 | Down-regulated |
| NM_005760    | CEBPZ            | 10153  | 24.1165 | 21.9352 | 17.4165 | 18.8189 | -0.3343 | 0.000363  | 0.0020665 | Down-regulated |

|              |                |        |         |         |         |         |         |           |           |                |
|--------------|----------------|--------|---------|---------|---------|---------|---------|-----------|-----------|----------------|
| NM_001083591 | CELF2          | 10659  | 6.06079 | 5.72139 | 4.89217 | 4.35747 | -0.3349 | 0.0026026 | 0.0116703 | Down-regulated |
| NM_139207    | NAP1L1         | 4673   | 13.62   | 14.3113 | 10.3588 | 11.5983 | -0.3352 | 0.0006747 | 0.0035989 | Down-regulated |
| NM_002396    | ME2            | 4200   | 18.6847 | 18.7947 | 14.8597 | 14.6741 | -0.3353 | 2.06E-06  | 1.83E-05  | Down-regulated |
| NM_001933    | DLST           | 1743   | 47.0937 | 44.2773 | 36.1571 | 35.8496 | -0.3353 | 2.94E-07  | 2.93E-06  | Down-regulated |
| NM_001039708 | SDCCAG3        | 10807  | 23.1089 | 21.9537 | 18.273  | 17.0932 | -0.3357 | 0.0015662 | 0.0075396 | Down-regulated |
| NM_130836    | OPA1           | 4976   | 8.48225 | 10.4302 | 7.88792 | 6.91147 | -0.3359 | 0.0141492 | 0.0496783 | Down-regulated |
| NM_001357    | DHX9           | 1660   | 42.8503 | 42.3162 | 32.5916 | 34.525  | -0.336  | 9.49E-10  | 1.26E-08  | Down-regulated |
| NM_006773    | DDX18          | 8886   | 22.1841 | 22.9855 | 17.5554 | 18.0025 | -0.3361 | 6.27E-06  | 5.14E-05  | Down-regulated |
| NM_025146    | e 50, NatE ca  | 80218  | 24.7085 | 21.912  | 17.5437 | 19.1191 | -0.3363 | 8.77E-05  | 0.0005706 | Down-regulated |
| NM_194449    | PHLPP1         | 23239  | 6.60819 | 6.6188  | 5.40242 | 4.97563 | -0.3368 | 0.0017693 | 0.0083698 | Down-regulated |
| NM_004214    | FIBP           | 9158   | 41.966  | 41.9015 | 33.5952 | 32.2501 | -0.3369 | 0.0003584 | 0.0020428 | Down-regulated |
| NM_001006    | RPS3A          | 6189   | 958.111 | 911.029 | 709.351 | 761.4   | -0.3369 | 8.67E-11  | 1.29E-09  | Down-regulated |
| NM_005762    | TRIM28         | 10155  | 145.91  | 151.108 | 115.322 | 118.647 | -0.3374 | 4.57E-16  | 1.04E-14  | Down-regulated |
| NM_006328    | RBM14          | 10432  | 9.52065 | 9.22347 | 7.58036 | 7.1453  | -0.3375 | 0.0005162 | 0.0028274 | Down-regulated |
| NM_001970    | EIF5A          | 1984   | 1722.09 | 1624.42 | 1331.91 | 1302.51 | -0.3377 | 6.25E-17  | 1.50E-15  | Down-regulated |
| NM_152345    | ANKRD13B       | 124930 | 16.1658 | 17.1663 | 13.6999 | 12.446  | -0.3377 | 0.0014448 | 0.0070551 | Down-regulated |
| NM_152682    | RWDD4          | 201965 | 13.3267 | 13.2785 | 10.8102 | 10.0244 | -0.3378 | 0.0054007 | 0.0219463 | Down-regulated |
| NM_015129    | 6-Sep          | 23157  | 11.0995 | 10.2789 | 8.47744 | 8.23791 | -0.3382 | 0.0045712 | 0.0189584 | Down-regulated |
| NM_145212    | MRPL30         | 51263  | 7.81412 | 8.58399 | 6.21233 | 6.6247  | -0.3383 | 0.0056977 | 0.0229247 | Down-regulated |
| NM_005625    | SDCBP          | 6386   | 241.273 | 222.033 | 175.459 | 188.82  | -0.3385 | 2.77E-08  | 3.12E-07  | Down-regulated |
| NM_0033070   | CECR5          | 27440  | 29.0325 | 27.1593 | 21.5239 | 22.4715 | -0.3387 | 0.0012778 | 0.0063367 | Down-regulated |
| NM_004703    | RABEP1         | 9135   | 19.2315 | 20.3418 | 15.4634 | 15.6475 | -0.3389 | 3.31E-07  | 3.27E-06  | Down-regulated |
| NM_001037663 | EEF1B2         | 1933   | 91.9387 | 106.08  | 73.8694 | 80.878  | -0.339  | 0.0028551 | 0.0126282 | Down-regulated |
| NM_001032363 | MINOS1         | 440574 | 35.5189 | 31.2874 | 26.1202 | 26.3191 | -0.3393 | 4.57E-05  | 0.0003152 | Down-regulated |
| NM_020782    | KLHL42         | 57542  | 7.94478 | 6.99862 | 6.02185 | 5.66703 | -0.3395 | 0.0029398 | 0.0129457 | Down-regulated |
| NM_001195563 | CAMTA1         | 23261  | 101.994 | 94.6519 | 81.8392 | 71.745  | -0.3399 | 0.0040416 | 0.0170768 | Down-regulated |
| NM_020750    | XPOS           | 57510  | 14.7113 | 15.6693 | 12.0249 | 11.8171 | -0.3402 | 1.60E-05  | 0.0001212 | Down-regulated |
| NM_001330177 | isophila)(PCN  | 64430  | 5.93909 | 6.26864 | 5.0098  | 4.50542 | -0.3406 | 0.0137908 | 0.0485536 | Down-regulated |
| NM_003321    | TUFM           | 7284   | 173.914 | 168.695 | 135.915 | 133.33  | -0.3408 | 5.17E-16  | 1.17E-14  | Down-regulated |
| NM_001265608 | TRAK1          | 22906  | 10.729  | 10.0763 | 7.71089 | 8.56412 | -0.3409 | 0.0016512 | 0.0078795 | Down-regulated |
| NM_019070    | DDX49          | 54555  | 34.2018 | 31.7598 | 24.4825 | 27.1022 | -0.3411 | 0.0012966 | 0.0064234 | Down-regulated |
| NM_014864    | FAM20B         | 9917   | 10.0109 | 12.5168 | 8.86576 | 8.7233  | -0.3411 | 0.0078632 | 0.0302239 | Down-regulated |
| NM_002568    | tein cytoplasm | 26986  | 246.597 | 246.93  | 192.505 | 195.372 | -0.3412 | 5.89E-29  | 2.73E-27  | Down-regulated |
| NM_018049    | PLEKHJ1        | 55111  | 53.725  | 46.0715 | 37.7192 | 40.1801 | -0.3412 | 0.0045101 | 0.0187417 | Down-regulated |
| NM_024114    | TRIM48         | 79097  | 73.4813 | 72.0332 | 57.2413 | 56.8482 | -0.3415 | 9.79E-07  | 9.09E-06  | Down-regulated |
| NM_001100389 | TMEM192        | 201931 | 12.0714 | 13.9313 | 9.9279  | 10.3937 | -0.3416 | 0.0021831 | 0.01002   | Down-regulated |
| NM_024100    | WDR18          | 57418  | 62.9    | 64.2127 | 48.8371 | 50.7987 | -0.3417 | 3.46E-06  | 2.96E-05  | Down-regulated |
| NM_001105530 | CAP1           | 10487  | 50.735  | 44.2189 | 35.7589 | 38.5608 | -0.3421 | 0.0001949 | 0.0011771 | Down-regulated |
| NM_015173    | TBC1D1         | 23216  | 10.863  | 11.3515 | 8.51372 | 8.87989 | -0.3426 | 8.00E-05  | 0.0005249 | Down-regulated |
| NR_002578    | otein coding)  | 60674  | 186.663 | 178.754 | 152.129 | 132.84  | -0.343  | 0.0007    | 0.0037216 | Down-regulated |
| NM_003002    | SDHD           | 6392   | 44.1982 | 45.2809 | 33.9914 | 35.911  | -0.3438 | 0.0002971 | 0.0017235 | Down-regulated |
| NM_015651    | PHF19          | 26147  | 9.32032 | 9.04209 | 7.0972  | 7.22047 | -0.3445 | 0.0014497 | 0.0070751 | Down-regulated |
| NM_017645    | HAUS6          | 54801  | 8.90396 | 9.32503 | 6.68335 | 7.55001 | -0.3447 | 0.0009192 | 0.0047519 | Down-regulated |
| NM_198395    | G3BP1          | 10146  | 73.1072 | 68.6097 | 54.1088 | 56.8072 | -0.3451 | 1.48E-08  | 1.72E-07  | Down-regulated |
| NM_016077    | PTRH2          | 51651  | 44.7316 | 48.5314 | 34.9898 | 37.4243 | -0.3457 | 0.0088756 | 0.0334422 | Down-regulated |
| NM_001417    | EIF4B          | 1975   | 115.75  | 111.92  | 90.2915 | 87.9693 | -0.3463 | 2.08E-18  | 5.49E-17  | Down-regulated |
| NM_001749    | CAPNS1         | 826    | 58.3339 | 59.6165 | 46.2368 | 45.8577 | -0.3466 | 2.80E-06  | 2.42E-05  | Down-regulated |
| NM_015231    | NUP160         | 23279  | 12.1711 | 12.7764 | 10.1379 | 9.33562 | -0.3467 | 0.0001313 | 0.0008258 | Down-regulated |
| NM_014668    | GREB1          | 9687   | 16.441  | 16.7585 | 13.3394 | 12.6142 | -0.347  | 1.58E-08  | 1.83E-07  | Down-regulated |
| NM_004390    | CTSH           | 1512   | 20.4603 | 20.3061 | 15.7803 | 15.8633 | -0.3473 | 0.0088041 | 0.0332255 | Down-regulated |
| NM_005176    | unit 9)(ATP5   | 517    | 212.056 | 200.252 | 160.913 | 160.811 | -0.3474 | 5.09E-08  | 5.57E-07  | Down-regulated |
| NM_002635    | SLC25A3        | 5250   | 208.109 | 207.239 | 157.44  | 167.199 | -0.3477 | 8.13E-13  | 1.43E-11  | Down-regulated |
| NM_032928    | TMEM141        | 85014  | 50.8042 | 47.1202 | 36.3496 | 39.5305 | -0.3478 | 0.0097879 | 0.0363139 | Down-regulated |
| NM_020639    | RIPK4          | 54101  | 37.1484 | 36.5184 | 29.3592 | 28.1874 | -0.3482 | 3.67E-09  | 4.57E-08  | Down-regulated |
| NM_004618    | ) III alpha(TC | 7156   | 6.87387 | 8.27362 | 5.88983 | 5.86989 | -0.3484 | 0.0056876 | 0.022893  | Down-regulated |
| NM_017780    | CHD7           | 55636  | 4.65211 | 5.27736 | 3.68819 | 4.03412 | -0.3487 | 0.0017249 | 0.0082004 | Down-regulated |
| NM_001144    | AMFR           | 267    | 22.9628 | 22.3705 | 17.0749 | 18.2658 | -0.3488 | 1.28E-05  | 9.86E-05  | Down-regulated |
| NM_003104    | SORD           | 6652   | 40.1251 | 35.8502 | 29.1649 | 30.0635 | -0.3491 | 3.35E-05  | 0.0002377 | Down-regulated |
| NM_001127211 | SHTN1          | 57698  | 12.1243 | 11.9049 | 9.11545 | 9.61012 | -0.3493 | 4.09E-05  | 0.0002848 | Down-regulated |
| NM_000075    | CDK4           | 1019   | 106.859 | 104.21  | 80.4621 | 84.3091 | -0.3493 | 9.15E-11  | 1.35E-09  | Down-regulated |
| NM_032217    | ANKRD17        | 26057  | 6.33317 | 5.30585 | 4.69177 | 4.3422  | -0.35   | 0.0037862 | 0.0161515 | Down-regulated |
| NM_005837    | POP7           | 10248  | 122.817 | 122.623 | 92.4917 | 98.5889 | -0.3505 | 5.68E-06  | 4.70E-05  | Down-regulated |
| NM_015062    | PPRC1          | 23082  | 9.99681 | 9.36145 | 7.76148 | 7.2831  | -0.3505 | 0.0004794 | 0.002654  | Down-regulated |
| NM_018256    | WDR12          | 55759  | 22.8146 | 21.7011 | 16.8793 | 17.713  | -0.3505 | 0.0005607 | 0.0030487 | Down-regulated |
| NM_032590    | KDM2B          | 84678  | 13.0391 | 13.2919 | 10.3556 | 10.1649 | -0.3505 | 1.03E-05  | 8.10E-05  | Down-regulated |
| NM_002254    | KIF3C          | 3797   | 53.156  | 53.5103 | 42.5512 | 40.7093 | -0.3507 | 1.47E-14  | 3.02E-13  | Down-regulated |
| NM_001242559 | MAP4K4         | 9448   | 10.8332 | 10.9888 | 8.05789 | 8.9412  | -0.3508 | 5.38E-05  | 0.0003667 | Down-regulated |
| NM_017672    | TRPM7          | 54822  | 5.10601 | 5.88309 | 4.44184 | 4.08372 | -0.351  | 0.00226   | 0.010323  | Down-regulated |
| NM_005796    | NUTF2          | 10204  | 34.5592 | 33.5445 | 26.5614 | 26.4649 | -0.3513 | 6.17E-06  | 5.07E-05  | Down-regulated |
| NM_019896    | POLE4          | 56655  | 96.9319 | 96.49   | 76.1882 | 73.7091 | -0.3517 | 0.0007134 | 0.0037864 | Down-regulated |
| NM_015169    | RRS1           | 23212  | 27.2102 | 26.1766 | 20.0041 | 21.3891 | -0.3519 | 0.0015384 | 0.0074255 | Down-regulated |
| NM_152326    | ANKRD9         | 122416 | 21.9746 | 21.3549 | 16.5991 | 16.9507 | -0.3522 | 0.0041427 | 0.0174119 | Down-regulated |
| NM_001136195 | TNPO2          | 30000  | 16.7354 | 16.4149 | 12.8298 | 12.9683 | -0.3525 | 9.21E-07  | 8.59E-06  | Down-regulated |
| NM_021178    | CCNB1IP1       | 57820  | 21.8321 | 21.8492 | 17.2573 | 16.5101 | -0.3526 | 0.0063624 | 0.0251741 | Down-regulated |
| NM_006600    | NUDC           | 10726  | 176.13  | 173.728 | 136.918 | 135.556 | -0.3534 | 1.49E-17  | 3.75E-16  | Down-regulated |
| NM_031280    | MRPS15         | 64960  | 113.205 | 98.7895 | 85.6013 | 78.7304 | -0.3535 | 0.0007103 | 0.0037733 | Down-regulated |
| NM_001127196 | CNBP           | 7555   | 34.4216 | 35.7684 | 26.957  | 27.6555 | -0.3537 | 5.81E-08  | 6.32E-07  | Down-regulated |
| NM_016312    | WBP11          | 51729  | 40.3237 | 39.7249 | 31.7563 | 30.5111 | -0.3538 | 1.73E-07  | 1.79E-06  | Down-regulated |
| NM_006330    | LYPLA1         | 10434  | 35.8899 | 31.9366 | 24.2573 | 28.2474 | -0.3545 | 0.0013995 | 0.0068651 | Down-regulated |
| NM_001035507 | AGBL5          | 60509  | 10.9496 | 10.5065 | 8.01926 | 8.5169  | -0.3546 | 0.0124642 | 0.0446232 | Down-regulated |
| NM_012225    | NUBP2          | 10101  | 45.7384 | 47.0569 | 36.7615 | 35.1383 | -0.3549 | 0.0001318 | 0.0008281 | Down-regulated |
| NM_016329    | SFMBT1         | 51460  | 8.26631 | 8.0377  | 6.77693 | 5.82007 | -0.3551 | 0.0064713 | 0.025547  | Down-regulated |
| NM_002952    | RPS2           | 6187   | 2771.74 | 2597.55 | 2093.54 | 2079.91 | -0.3552 | 1.85E-17  | 4.60E-16  | Down-regulated |
| NM_006233    | POLR2I         | 5438   | 71.5587 | 65.4915 | 52.724  | 53.1787 | -0.356  | 0.0013219 | 0.0065315 | Down-regulated |

|              |                  |        |         |         |         |         |         |           |           |                |
|--------------|------------------|--------|---------|---------|---------|---------|---------|-----------|-----------|----------------|
| NM_014487    | ZNF330           | 27309  | 35.5962 | 30.4907 | 24.694  | 26.3259 | -0.3564 | 0.0022269 | 0.0101913 | Down-regulated |
| NM_002766    | PRPSAP1          | 5635   | 21.9384 | 20.8498 | 16.9993 | 16.1165 | -0.3567 | 0.0005021 | 0.0027609 | Down-regulated |
| NM_032012    | TMEM245          | 23731  | 6.9387  | 7.14453 | 5.43268 | 5.48278 | -0.3569 | 5.39E-05  | 0.0003673 | Down-regulated |
| NM_004864    | GDF15            | 9518   | 318.345 | 313.358 | 252.379 | 237.97  | -0.3577 | 1.06E-14  | 2.19E-13  | Down-regulated |
| NM_001003796 | U6.U5(SNU6)      | 4809   | 116.177 | 110.897 | 86.1383 | 89.9204 | -0.358  | 7.93E-09  | 9.51E-08  | Down-regulated |
| NM_005063    | SCD              | 6319   | 342.861 | 344.589 | 269.987 | 264.113 | -0.3581 | 5.64E-38  | 3.48E-36  | Down-regulated |
| NM_001689    | unit 9)(ATP5     | 518    | 63.3023 | 61.2451 | 46.4412 | 50.1544 | -0.3582 | 3.92E-08  | 4.35E-07  | Down-regulated |
| NM_003683    | RRP1             | 8568   | 63.0504 | 58.7488 | 46.9306 | 47.4559 | -0.3582 | 1.28E-06  | 1.17E-05  | Down-regulated |
| NM_003851    | CREG1            | 8804   | 32.9257 | 31.5496 | 26.598  | 23.2267 | -0.3586 | 0.0007502 | 0.0039696 | Down-regulated |
| NM_025234    | WDR61            | 80349  | 43.4287 | 43.2361 | 34.6013 | 32.3226 | -0.3586 | 0.0003921 | 0.0022132 | Down-regulated |
| NM_015024    | XPO7             | 23039  | 19.472  | 19.1398 | 15.2909 | 14.6349 | -0.3587 | 3.99E-07  | 3.91E-06  | Down-regulated |
| NM_015922    | id dehydroge     | 50814  | 26.6292 | 28.4208 | 21.7869 | 20.6711 | -0.359  | 0.0020979 | 0.0096965 | Down-regulated |
| NM_006844    | ILVBL            | 10994  | 62.7194 | 62.155  | 49.5359 | 47.2487 | -0.3594 | 3.02E-09  | 3.80E-08  | Down-regulated |
| NM_000436    | OXCT1            | 5019   | 25.3686 | 24.9726 | 19.6872 | 19.3018 | -0.3595 | 4.17E-07  | 4.08E-06  | Down-regulated |
| NM_001037738 | NPM1             | 4869   | 299.24  | 263.182 | 216.897 | 218.46  | -0.3598 | 3.28E-07  | 3.24E-06  | Down-regulated |
| NM_032333    | FAM213A          | 84293  | 31.9855 | 35.0206 | 25.7371 | 25.9899 | -0.3601 | 0.0004064 | 0.0022887 | Down-regulated |
| NM_001634    | AMD1             | 262    | 45.8764 | 42.6245 | 33.2887 | 35.2305 | -0.3602 | 1.93E-07  | 1.97E-06  | Down-regulated |
| NM_002617    | PEX10            | 5192   | 25.8511 | 28.1056 | 21.8013 | 19.8106 | -0.3603 | 0.0011721 | 0.005869  | Down-regulated |
| NM_198830    | ACLY             | 47     | 23.7555 | 25.147  | 18.787  | 19.0636 | -0.3605 | 2.68E-07  | 2.68E-06  | Down-regulated |
| NM_003981    | PRC1             | 9055   | 15.6988 | 15.3857 | 12.2891 | 11.7046 | -0.3611 | 0.0002571 | 0.0015114 | Down-regulated |
| NM_004595    | SMS              | 6611   | 89.9342 | 84.7086 | 68.025  | 67.105  | -0.3613 | 5.74E-09  | 7.02E-08  | Down-regulated |
| NM_014521    | SH3BP4           | 23677  | 26.1461 | 26.107  | 20.7317 | 19.7199 | -0.3614 | 3.08E-09  | 3.87E-08  | Down-regulated |
| NM_006023    | CDC123           | 8872   | 90.2886 | 85.4659 | 68.8636 | 67.089  | -0.3615 | 5.85E-08  | 6.35E-07  | Down-regulated |
| NM_003011    | SET              | 6418   | 153.152 | 148.303 | 114.846 | 118.604 | -0.3619 | 1.01E-18  | 2.72E-17  | Down-regulated |
| NM_001321291 | USP36            | 57602  | 10.3481 | 11.4973 | 8.50729 | 8.34052 | -0.3621 | 0.0001666 | 0.0010228 | Down-regulated |
| NM_015955    | MEMO1            | 51072  | 19.2706 | 19.3434 | 13.5197 | 16.0974 | -0.3625 | 0.0104012 | 0.038266  | Down-regulated |
| NM_004689    | MTA1             | 9112   | 18.1588 | 19.7349 | 15.5268 | 13.6335 | -0.3627 | 0.0017684 | 0.0083697 | Down-regulated |
| NM_032864    | PRPF38A          | 84950  | 16.6966 | 16.3388 | 13.0166 | 12.4492 | -0.3629 | 0.0004517 | 0.0025148 | Down-regulated |
| NM_181489    | ZNF445           | 353274 | 3.03162 | 3.12603 | 2.4776  | 2.25862 | -0.363  | 0.0041004 | 0.0172799 | Down-regulated |
| NM_001276760 | TP53             | 7157   | 24.1019 | 22.2276 | 17.0909 | 18.6126 | -0.363  | 0.0004062 | 0.0022881 | Down-regulated |
| NM_006370    | VTTIB            | 10490  | 38.2878 | 35.4876 | 29.9302 | 26.7819 | -0.3633 | 0.0025867 | 0.0116131 | Down-regulated |
| NM_031946    | AGAP3            | 116988 | 24.0338 | 27.0423 | 20.8925 | 18.4374 | -0.3633 | 0.0005044 | 0.0027711 | Down-regulated |
| NM_001025235 | TSPAN4           | 7106   | 19.5143 | 19.0277 | 15.2005 | 14.3252 | -0.3638 | 0.0121568 | 0.0436944 | Down-regulated |
| NM_017952    | PTCD3            | 55037  | 8.62403 | 7.92051 | 6.34546 | 6.40217 | -0.3639 | 0.0001569 | 0.0009696 | Down-regulated |
| NM_003253    | TIAM1            | 7074   | 7.08065 | 7.52514 | 5.49475 | 5.75232 | -0.3649 | 0.00018   | 0.0010933 | Down-regulated |
| NM_001040158 | H2AFY            | 9555   | 37.4071 | 38.6289 | 29.5148 | 29.0536 | -0.3649 | 1.09E-05  | 8.55E-05  | Down-regulated |
| NM_018715    | RCC2             | 55920  | 45.9235 | 46.8509 | 36.9784 | 34.6706 | -0.365  | 2.92E-10  | 4.12E-09  | Down-regulated |
| NM_001330437 | PTPN11           | 5781   | 8.86642 | 9.2205  | 6.28348 | 7.59918 | -0.3654 | 0.0028942 | 0.0127683 | Down-regulated |
| NM_004763    | ITGB1BP1         | 9270   | 13.1826 | 12.4575 | 10.0633 | 9.55556 | -0.3655 | 0.0128311 | 0.0457056 | Down-regulated |
| NM_014765    | TOMM20           | 9804   | 54.3072 | 53.7465 | 40.1808 | 43.23   | -0.3656 | 1.20E-09  | 1.58E-08  | Down-regulated |
| NM_020385    | REXO4            | 57109  | 26.6116 | 25.6743 | 19.7385 | 20.5264 | -0.3656 | 4.06E-05  | 0.0002825 | Down-regulated |
| NM_001743    | CALM2            | 805    | 356.859 | 335.598 | 267.555 | 266.814 | -0.366  | 6.89E-15  | 1.44E-13  | Down-regulated |
| NM_013975    | LIG3             | 3980   | 10.6407 | 11.2338 | 7.57524 | 9.1574  | -0.3663 | 0.0078003 | 0.0300113 | Down-regulated |
| NM_013257    | SGK3             | 23678  | 6.72604 | 6.35547 | 5.01274 | 4.99854 | -0.3664 | 0.0060527 | 0.0241439 | Down-regulated |
| NM_002843    | PTPRJ            | 5795   | 11.2508 | 12.206  | 9.14589 | 8.92145 | -0.3665 | 3.62E-06  | 3.08E-05  | Down-regulated |
| NM_032194    | RPF2             | 84154  | 9.34221 | 8.75522 | 6.37076 | 7.46955 | -0.3666 | 0.0092073 | 0.0345152 | Down-regulated |
| NM_014053    | FLVCR1           | 28982  | 3.6119  | 3.70891 | 2.84031 | 2.74658 | -0.3667 | 0.0133915 | 0.0473661 | Down-regulated |
| NM_001301210 | MYEF2            | 50804  | 9.12244 | 8.51182 | 6.48532 | 7.0536  | -0.3668 | 0.0006981 | 0.0037144 | Down-regulated |
| NM_005964    | MYH10            | 4628   | 20.5917 | 22.0228 | 16.9051 | 15.9427 | -0.3668 | 4.21E-08  | 4.65E-07  | Down-regulated |
| NM_006335    | ast)(TIMM17      | 10440  | 72.1286 | 69.8431 | 53.8444 | 55.5136 | -0.367  | 5.57E-08  | 6.07E-07  | Down-regulated |
| NM_015160    | PMPCA            | 23203  | 42.8768 | 42.245  | 33.6817 | 31.8711 | -0.3671 | 1.16E-06  | 1.06E-05  | Down-regulated |
| NM_001412    | EIF1AX           | 1964   | 27.7323 | 27.3461 | 21.1068 | 21.3614 | -0.3671 | 1.11E-09  | 1.47E-08  | Down-regulated |
| NM_015143    | METAP1           | 23173  | 26.5524 | 25.3585 | 19.077  | 20.8427 | -0.3673 | 5.63E-05  | 0.0003817 | Down-regulated |
| NM_021814    | ELOVL5           | 60481  | 37.0345 | 37.2803 | 27.7422 | 29.5206 | -0.3673 | 1.16E-07  | 1.22E-06  | Down-regulated |
| NM_003400    | XPO1             | 7514   | 52.8003 | 52.8829 | 41.3549 | 40.1257 | -0.3683 | 2.76E-16  | 6.34E-15  | Down-regulated |
| NM_004656    | NAP1L1           | 4673   | 22.1702 | 20.9026 | 16.7111 | 16.4535 | -0.3683 | 4.26E-08  | 4.71E-07  | Down-regulated |
| NM_003377    | VEGFB            | 7423   | 26.4326 | 22.8189 | 19.2257 | 18.4169 | -0.369  | 0.0038374 | 0.016337  | Down-regulated |
| NM_002135    | NR4A1            | 3164   | 17.3868 | 16.5466 | 12.2505 | 13.7283 | -0.3694 | 0.0014301 | 0.0069901 | Down-regulated |
| NM_014389    | PELP1            | 27043  | 63.3758 | 64.0638 | 49.7861 | 48.3435 | -0.3697 | 4.49E-15  | 9.60E-14  | Down-regulated |
| NM_014165    | NDUFAF4          | 29078  | 11.4212 | 10.5536 | 8.64493 | 8.072   | -0.3701 | 0.0109886 | 0.0401238 | Down-regulated |
| NM_017623    | CNNM3            | 26505  | 11.1827 | 12.4542 | 9.12963 | 9.00784 | -0.3703 | 0.0002544 | 0.0014973 | Down-regulated |
| NM_174889    | NDUFAF2          | 91942  | 149.055 | 118.925 | 96.6941 | 107.355 | -0.3704 | 0.0077352 | 0.0298098 | Down-regulated |
| NM_173517    | VKORC1L1         | 154807 | 4.41415 | 4.58429 | 3.3802  | 3.48893 | -0.3707 | 0.0049296 | 0.0202429 | Down-regulated |
| NM_014719    | TCAF1            | 9747   | 10.0744 | 11.7059 | 7.39752 | 9.21306 | -0.371  | 0.0088643 | 0.0334129 | Down-regulated |
| NM_017911    | FAM118A          | 55007  | 8.18586 | 8.21298 | 6.13676 | 6.34973 | -0.3715 | 0.010126  | 0.0374387 | Down-regulated |
| NM_005733    | KIF20A           | 10112  | 13.0309 | 12.6248 | 9.39873 | 10.2274 | -0.3717 | 0.000666  | 0.0035595 | Down-regulated |
| NM_001303274 | ACLY             | 47     | 76.1283 | 74.8559 | 59.6147 | 56.4675 | -0.3721 | 2.16E-15  | 4.74E-14  | Down-regulated |
| NM_016338    | IPO11            | 51194  | 7.59383 | 7.42895 | 5.27434 | 6.17181 | -0.3722 | 0.0068796 | 0.0269416 | Down-regulated |
| NM_016059    | PP1L1            | 51645  | 22.8341 | 25.9085 | 18.7949 | 18.378  | -0.3722 | 0.0030131 | 0.0132134 | Down-regulated |
| NM_002101    | blood group)     | 2995   | 109.651 | 94.5122 | 75.4547 | 80.7766 | -0.3722 | 0.0001517 | 0.000942  | Down-regulated |
| NM_001128917 | TOMM40           | 10452  | 27.6247 | 27.6709 | 21.8051 | 20.4861 | -0.3726 | 0.0003408 | 0.0019526 | Down-regulated |
| NM_020761    | RPTOR            | 57521  | 15.7831 | 16.3971 | 13.5614 | 11.0449 | -0.3726 | 0.0006983 | 0.0037147 | Down-regulated |
| NM_031463    | HSDL1            | 83693  | 17.4655 | 16.3857 | 12.8109 | 13.123  | -0.3726 | 3.72E-05  | 0.0002609 | Down-regulated |
| NM_001286616 | ANO4             | 121601 | 15.4165 | 14.2846 | 12.7682 | 9.81111 | -0.373  | 0.0112322 | 0.0408497 | Down-regulated |
| NM_016498    | MTFP1            | 51537  | 26.6766 | 26.6035 | 21.31   | 19.2953 | -0.3731 | 0.0059278 | 0.0236952 | Down-regulated |
| NM_001258373 | SPATA20          | 64847  | 31.548  | 24.6596 | 20.3688 | 22.4285 | -0.3732 | 0.0064355 | 0.0254318 | Down-regulated |
| NM_001170535 | ATAD3A           | 55210  | 66.1127 | 66.9415 | 50.1857 | 51.9642 | -0.3734 | 2.10E-11  | 3.28E-10  | Down-regulated |
| NM_024656    | transferase 1    | 79709  | 363.23  | 362.488 | 285.432 | 272.209 | -0.3736 | 2.13E-25  | 8.46E-24  | Down-regulated |
| NM_001206844 | TGOLN2           | 10618  | 6.76834 | 6.29259 | 4.8367  | 5.13482 | -0.3739 | 0.000948  | 0.0048808 | Down-regulated |
| NM_001005339 | RGS10            | 6001   | 50.617  | 46.4219 | 37.4645 | 36.4178 | -0.3739 | 0.0033675 | 0.0145605 | Down-regulated |
| NM_001281534 | EPB41L3          | 23136  | 11.2673 | 10.8029 | 8.49366 | 8.36852 | -0.3743 | 0.000236  | 0.0013968 | Down-regulated |
| NM_152298    | NASP             | 4678   | 34.215  | 32.4633 | 25.1648 | 25.8894 | -0.3744 | 6.55E-06  | 5.35E-05  | Down-regulated |
| NM_001135653 | tein cytoplasmic | 8761   | 37.5099 | 42.3687 | 30.4432 | 30.7286 | -0.3746 | 6.06E-06  | 4.99E-05  | Down-regulated |
| NM_006387    | CHERP            | 10523  | 58.041  | 58.4766 | 46.0151 | 43.3793 | -0.3748 | 7.25E-13  | 1.28E-11  | Down-regulated |

|              |               |        |         |         |         |         |         |           |           |                |
|--------------|---------------|--------|---------|---------|---------|---------|---------|-----------|-----------|----------------|
| NM_015533    | TKFC          | 26007  | 13.0291 | 12.766  | 10.3185 | 9.39008 | -0.375  | 0.0001757 | 0.0010707 | Down-regulated |
| NM_006293    | TYRO3         | 7301   | 37.2583 | 36.7099 | 29.1479 | 27.5582 | -0.3751 | 7.67E-10  | 1.03E-08  | Down-regulated |
| NM_000532    | PCCB          | 5096   | 46.0939 | 45.4929 | 35.1288 | 35.0054 | -0.3751 | 9.88E-07  | 9.17E-06  | Down-regulated |
| NM_001271845 | TBC1D16       | 125058 | 62.551  | 66.4376 | 49.8877 | 49.0945 | -0.3753 | 2.24E-17  | 5.53E-16  | Down-regulated |
| NM_001170634 | FUS           | 2521   | 26.748  | 28.1942 | 22.5039 | 19.522  | -0.3754 | 2.03E-05  | 0.0001506 | Down-regulated |
| NM_003642    | HAT1          | 8520   | 34.7496 | 34.1899 | 26.6929 | 26.0068 | -0.3756 | 7.06E-05  | 0.000469  | Down-regulated |
| NM_144998    | CENPX         | 201254 | 81.9869 | 77.3194 | 62.4363 | 58.9886 | -0.3758 | 0.0010383 | 0.005275  | Down-regulated |
| NM_005124    | NUP153        | 9972   | 10.85   | 10.7612 | 8.33007 | 8.20378 | -0.3762 | 5.02E-06  | 4.18E-05  | Down-regulated |
| NM_015425    | POLR1A        | 25885  | 8.19814 | 8.86351 | 6.70962 | 6.32656 | -0.3765 | 2.43E-05  | 0.0001775 | Down-regulated |
| NM_004301    | ACTL6A        | 86     | 59.0243 | 55.3942 | 44.3635 | 43.1379 | -0.3766 | 3.15E-07  | 3.12E-06  | Down-regulated |
| NM_006391    | IPO7          | 10527  | 54.4297 | 53.0641 | 40.3501 | 42.0449 | -0.3767 | 1.17E-17  | 2.95E-16  | Down-regulated |
| NM_000270    | PNP           | 4860   | 21.8067 | 21.8468 | 14.5115 | 18.599  | -0.377  | 0.0084603 | 0.0321756 | Down-regulated |
| NM_001145771 | ADGRG1        | 9289   | 84.0489 | 84.2436 | 65.8484 | 63.0015 | -0.3783 | 1.15E-18  | 3.08E-17  | Down-regulated |
| NM_007067    | KAT7          | 11143  | 11.6704 | 12.2848 | 8.51671 | 9.72024 | -0.3785 | 0.0016862 | 0.0080344 | Down-regulated |
| NM_001308263 | RNNMT         | 8731   | 8.97823 | 7.81559 | 6.72463 | 6.00754 | -0.3786 | 0.0073497 | 0.0285488 | Down-regulated |
| NM_006753    | SURF6         | 6838   | 27.7852 | 28.1242 | 22.0088 | 20.6223 | -0.3788 | 2.60E-05  | 0.0001883 | Down-regulated |
| NM_015201    | BOP1          | 23246  | 106.876 | 125.185 | 92.3924 | 84.6248 | -0.3789 | 2.52E-05  | 0.0001835 | Down-regulated |
| NM_001105206 | LAMA4         | 3910   | 4.08194 | 3.61004 | 2.77793 | 3.04743 | -0.3791 | 0.0087874 | 0.0331688 | Down-regulated |
| NM_052859    | RFT1          | 91869  | 5.3291  | 5.56564 | 4.15025 | 4.12047 | -0.3792 | 0.0038831 | 0.0165021 | Down-regulated |
| NM_020964    | EPG5          | 57724  | 3.46867 | 3.79365 | 2.8277  | 2.70043 | -0.3794 | 0.0004288 | 0.002401  | Down-regulated |
| NM_001170649 | LAS1L         | 81887  | 17.805  | 19.3337 | 14.5468 | 13.6761 | -0.3795 | 0.0008286 | 0.0043315 | Down-regulated |
| NM_000310    | PPT1          | 5538   | 113.862 | 112.068 | 85.3392 | 87.4405 | -0.3798 | 6.12E-18  | 1.57E-16  | Down-regulated |
| NM_001611    | ACP5          | 54     | 106.904 | 111.137 | 81.2377 | 85.1753 | -0.3805 | 1.71E-09  | 2.20E-08  | Down-regulated |
| NM_014342    | MTCH2         | 23788  | 53.8346 | 52.6476 | 39.9038 | 41.3908 | -0.3809 | 2.94E-10  | 4.15E-09  | Down-regulated |
| NM_013393    | MRM2          | 29960  | 20.4277 | 19.983  | 14.8118 | 15.797  | -0.3811 | 0.0039559 | 0.0167671 | Down-regulated |
| NM_030810    | TXNDC5        | 81567  | 139.88  | 137.209 | 105.308 | 106.488 | -0.3811 | 3.70E-26  | 1.53E-24  | Down-regulated |
| NM_018121    | SLF2          | 55719  | 5.02712 | 4.93419 | 3.89236 | 3.66727 | -0.3811 | 0.0008652 | 0.0045066 | Down-regulated |
| NM_005348    | HSP90AA1      | 3320   | 492.616 | 481.449 | 362.904 | 381.405 | -0.3814 | 2.93E-24  | 1.09E-22  | Down-regulated |
| NM_001284214 | TRIP12        | 9320   | 6.46088 | 6.55881 | 4.96964 | 4.94801 | -0.3816 | 2.47E-06  | 2.16E-05  | Down-regulated |
| NM_174931    | GPATCH11      | 253635 | 8.84098 | 9.07064 | 7.05391 | 6.53053 | -0.3821 | 0.0015899 | 0.0076365 | Down-regulated |
| NM_001287    | CLCN7         | 1186   | 93.4255 | 100.38  | 77.0289 | 70.7682 | -0.3826 | 1.20E-09  | 1.58E-08  | Down-regulated |
| NM_001017919 | RCCD1         | 91433  | 13.8126 | 14.0151 | 11.1252 | 9.96523 | -0.3827 | 0.002062  | 0.0095559 | Down-regulated |
| NM_002741    | PKN1          | 5585   | 125.163 | 124.399 | 98.0636 | 92.3877 | -0.3827 | 1.72E-16  | 4.02E-15  | Down-regulated |
| NM_001294340 | ZC3H18        | 124245 | 8.76745 | 8.6215  | 6.51332 | 6.66089 | -0.383  | 0.0013877 | 0.0068175 | Down-regulated |
| NM_002079    | GOT1          | 2805   | 23.4965 | 23.369  | 17.9581 | 17.6373 | -0.3833 | 0.0001127 | 0.000718  | Down-regulated |
| NM_001201377 | ALDH7A1       | 501    | 16.1053 | 15.9432 | 12.2906 | 12.1152 | -0.3839 | 2.53E-07  | 2.54E-06  | Down-regulated |
| NM_001916    | CYC1          | 1537   | 349.091 | 332.442 | 264.903 | 254.326 | -0.3842 | 2.12E-15  | 4.65E-14  | Down-regulated |
| NM_015434    | INTS7         | 25896  | 5.8579  | 6.14479 | 4.14027 | 4.90324 | -0.3843 | 0.0116134 | 0.0419861 | Down-regulated |
| NM_012426    | SF3B3         | 23450  | 23.9263 | 23.9205 | 18.1208 | 18.3538 | -0.3845 | 4.02E-18  | 1.05E-16  | Down-regulated |
| NM_144683    | DHRS13        | 147015 | 18.3009 | 17.5863 | 14.657  | 12.4163 | -0.3847 | 0.00719   | 0.0280081 | Down-regulated |
| NM_015102    | NPHP4         | 261734 | 6.17523 | 5.98343 | 4.76888 | 4.43003 | -0.3852 | 0.0026779 | 0.011966  | Down-regulated |
| NM_024644    | C14orf169     | 79697  | 15.9755 | 15.982  | 12.5417 | 11.6648 | -0.3853 | 0.0008426 | 0.0043978 | Down-regulated |
| NM_004559    | YBX1          | 4904   | 652.935 | 612.005 | 482.178 | 481.44  | -0.3856 | 4.73E-21  | 1.48E-19  | Down-regulated |
| NM_024665    | TBL1XR1       | 79718  | 15.7798 | 15.2465 | 11.7712 | 11.8411 | -0.3859 | 1.91E-10  | 2.76E-09  | Down-regulated |
| NM_001128916 | TOMM40        | 10452  | 86.5072 | 68.5825 | 59.2375 | 58.0918 | -0.3861 | 0.0010193 | 0.005194  | Down-regulated |
| NM_002726    | PREP          | 5550   | 25.6818 | 24.6598 | 18.3972 | 19.8212 | -0.3861 | 8.90E-06  | 7.08E-05  | Down-regulated |
| NM_015367    | BCL2L13       | 23786  | 10.3004 | 10.2133 | 8.66439 | 6.81797 | -0.3862 | 0.0053844 | 0.0218938 | Down-regulated |
| NM_004622    | TSN           | 7247   | 27.6091 | 26.4814 | 20.5503 | 20.5687 | -0.3862 | 8.39E-08  | 8.93E-07  | Down-regulated |
| NM_030653    | DDX11         | 1663   | 23.2706 | 25.1916 | 18.5827 | 18.2344 | -0.3864 | 9.11E-07  | 8.51E-06  | Down-regulated |
| NM_015044    | GGA2          | 23062  | 9.10247 | 8.84988 | 6.91156 | 6.7147  | -0.3867 | 2.71E-05  | 0.0001961 | Down-regulated |
| NM_017891    | C1orf159      | 54991  | 14.1456 | 13.0731 | 10.4463 | 10.0652 | -0.387  | 0.0055181 | 0.0223237 | Down-regulated |
| NM_024026    | MRPL57        | 78988  | 13.8449 | 12.0677 | 9.69817 | 9.85338 | -0.3873 | 0.0041317 | 0.0173786 | Down-regulated |
| NM_012458    | TMEM13        | 26517  | 78.2934 | 74.1922 | 57.3735 | 58.1654 | -0.3874 | 3.51E-10  | 4.91E-09  | Down-regulated |
| NM_001009993 | FAM168B       | 130074 | 30.6111 | 31.9365 | 24.4805 | 23.0545 | -0.3877 | 3.71E-10  | 5.18E-09  | Down-regulated |
| NM_014067    | MACROD1       | 28992  | 110.756 | 102.488 | 81.058  | 80.6601 | -0.3882 | 9.34E-08  | 9.91E-07  | Down-regulated |
| NM_012073    | CCT5          | 22948  | 133.359 | 126.872 | 97.5578 | 100.278 | -0.3885 | 2.88E-19  | 8.16E-18  | Down-regulated |
| NM_025150    | nitative)(TAR | 80222  | 20.5667 | 20.6081 | 16.5526 | 14.5688 | -0.3886 | 0.000259  | 0.0015201 | Down-regulated |
| NM_001082959 | SCARB1        | 949    | 14.7789 | 14.0424 | 12.0601 | 9.60105 | -0.3887 | 0.0108422 | 0.0396633 | Down-regulated |
| NM_015056    | RRP1B         | 23076  | 19.6015 | 18.7016 | 14.3374 | 14.7278 | -0.389  | 4.06E-08  | 4.50E-07  | Down-regulated |
| NM_002334    | LRP4          | 4038   | 3.82635 | 4.11622 | 3.23184 | 2.74125 | -0.3895 | 0.006235  | 0.0247623 | Down-regulated |
| NR_046252    | FGD5-AS1      | 1E+08  | 24.9017 | 26.1546 | 20.4383 | 18.2184 | -0.3898 | 1.04E-05  | 8.12E-05  | Down-regulated |
| NM_001346754 | M_00134675    | NA     | 7.9588  | 8.46533 | 6.55573 | 5.78    | -0.3901 | 0.0112328 | 0.0408497 | Down-regulated |
| NM_006409    | ARPC1A        | 10552  | 151.761 | 145.235 | 109.191 | 116.045 | -0.3903 | 2.16E-11  | 3.36E-10  | Down-regulated |
| NM_001008392 | CTDSP1        | 10217  | 7.68997 | 8.23323 | 6.39188 | 5.57387 | -0.3906 | 0.0034069 | 0.0147209 | Down-regulated |
| NM_052963    | mitochondrial | 116447 | 46.0736 | 45.4403 | 35.6568 | 33.6364 | -0.3912 | 5.17E-07  | 5.00E-06  | Down-regulated |
| NM_000143    | FH            | 2271   | 44.3137 | 40.8759 | 33.2681 | 31.1222 | -0.3916 | 1.85E-05  | 0.0001376 | Down-regulated |
| NM_024718    | RABL6         | 55684  | 95.2635 | 97.0513 | 74.9761 | 70.8177 | -0.392  | 2.64E-15  | 5.74E-14  | Down-regulated |
| NM_006122    | MAN2A2        | 4122   | 13.6936 | 12.0307 | 8.42224 | 10.8969 | -0.3922 | 0.0050586 | 0.0207146 | Down-regulated |
| NM_001111019 | NAV2          | 89797  | 21.2506 | 20.9853 | 15.3977 | 16.5964 | -0.3923 | 1.24E-10  | 1.82E-09  | Down-regulated |
| NM_032273    | TMEM126A      | 84233  | 36.8071 | 35.0085 | 25.8457 | 27.711  | -0.3932 | 0.0135156 | 0.0477608 | Down-regulated |
| NM_020315    | PDXP          | 57026  | 36.9091 | 35.7659 | 28.7174 | 26.1213 | -0.3933 | 2.12E-05  | 0.0001564 | Down-regulated |
| NM_005363    | MAGEA6        | 4105   | 61.0034 | 68.9725 | 45.8527 | 52.1452 | -0.3935 | 0.0001494 | 0.0009284 | Down-regulated |
| NM_024313    | NOL12         | 79159  | 7.94955 | 8.09762 | 5.72617 | 6.28477 | -0.3937 | 0.010756  | 0.039416  | Down-regulated |
| NM_018353    | MIS18BP1      | 55320  | 5.41591 | 5.37729 | 4.20355 | 3.8894  | -0.3947 | 0.0047741 | 0.0196721 | Down-regulated |
| NM_001289405 | MMS19         | 64210  | 21.8156 | 20.1151 | 15.1117 | 16.4887 | -0.3947 | 2.76E-05  | 0.0001991 | Down-regulated |
| NR_046322    | STARD7-AS1    | 285033 | 14.2185 | 13.9643 | 9.77672 | 11.365  | -0.3951 | 0.0036776 | 0.0157516 | Down-regulated |
| NM_177983    | PPM1G         | 5496   | 93.2727 | 90.3821 | 70.4176 | 68.4059 | -0.3959 | 2.38E-14  | 4.82E-13  | Down-regulated |
| NM_001025070 | RPS14         | 6208   | 56.3732 | 51.0673 | 41.7825 | 38.4097 | -0.396  | 0.0052865 | 0.0215461 | Down-regulated |
| NM_006067    | EMC8          | 10328  | 14.4577 | 15.5412 | 11.4711 | 10.9955 | -0.3966 | 0.0041423 | 0.0174119 | Down-regulated |
| NM_001256802 | RPS3          | 6188   | 704.695 | 665.786 | 521.192 | 514.225 | -0.3967 | 3.49E-22  | 1.15E-20  | Down-regulated |
| NM_006062    | SMYD5         | 10322  | 11.5614 | 11.335  | 8.91143 | 8.25582 | -0.3973 | 0.0031713 | 0.0137933 | Down-regulated |
| NM_015354    | NUP188        | 23511  | 14.511  | 14.605  | 11.1717 | 10.7934 | -0.3973 | 7.65E-08  | 8.17E-07  | Down-regulated |
| NM_013319    | UBIAD1        | 29914  | 8.21936 | 7.98256 | 5.92316 | 6.21643 | -0.3974 | 0.0021471 | 0.0098854 | Down-regulated |
| NM_030796    | VOPP1         | 81552  | 17.6398 | 18.5192 | 13.7084 | 13.4896 | -0.3977 | 3.74E-05  | 0.0002625 | Down-regulated |

|              |               |        |         |         |         |         |         |           |           |                |
|--------------|---------------|--------|---------|---------|---------|---------|---------|-----------|-----------|----------------|
| NM_001569    | IRAK1         | 3654   | 73.1316 | 70.2887 | 55.2856 | 53.0056 | -0.3977 | 6.07E-15  | 1.28E-13  | Down-regulated |
| NM_023936    | MRPS34        | 65993  | 113.318 | 116.003 | 90.6119 | 81.9748 | -0.3978 | 2.15E-06  | 1.90E-05  | Down-regulated |
| NM_003569    | STX7          | 8417   | 30.7142 | 28.0275 | 22.0033 | 22.284  | -0.398  | 5.38E-08  | 5.87E-07  | Down-regulated |
| NM_177433    | MAGED2        | 10916  | 190.247 | 200.554 | 148.207 | 146.737 | -0.3986 | 1.00E-18  | 2.71E-17  | Down-regulated |
| NM_001080470 | ZNF697        | 90874  | 10.9237 | 11.6913 | 8.10358 | 8.88461 | -0.3991 | 9.09E-05  | 0.0005892 | Down-regulated |
| NM_002453    | MTIF2         | 4528   | 18.168  | 20.6617 | 13.9316 | 15.1527 | -0.3991 | 0.0010281 | 0.0052328 | Down-regulated |
| NM_007105    | SLC22A18A5    | 5003   | 19.331  | 20.2024 | 14.9822 | 14.6882 | -0.3993 | 0.000169  | 0.0010341 | Down-regulated |
| NM_003090    | SNRPA1        | 6627   | 55.8111 | 46.225  | 41.5366 | 34.3946 | -0.4    | 0.00959   | 0.0356978 | Down-regulated |
| NM_001134382 | IQSEC1        | 9922   | 6.81305 | 6.47457 | 5.0626  | 4.92083 | -0.4    | 4.54E-05  | 0.0003132 | Down-regulated |
| NM_015720    | PODXL2        | 50512  | 70.7936 | 65.6904 | 48.9985 | 53.6562 | -0.4    | 2.45E-07  | 2.47E-06  | Down-regulated |
| NM_001121    | ADD3          | 120    | 15.1993 | 12.6311 | 9.9164  | 10.9087 | -0.4005 | 0.001499  | 0.0072585 | Down-regulated |
| NM_020117    | LARS          | 51520  | 38.9454 | 38.7105 | 28.8593 | 29.6734 | -0.4005 | 1.75E-15  | 3.86E-14  | Down-regulated |
| NM_002687    | PNN           | 5411   | 36.381  | 39.2523 | 27.7424 | 29.1819 | -0.4005 | 2.59E-08  | 2.92E-07  | Down-regulated |
| NM_014046    | MRPS18B       | 28973  | 62.6982 | 55.4776 | 43.7774 | 44.9335 | -0.4006 | 2.32E-05  | 0.0001703 | Down-regulated |
| NM_001001894 | TTC3          | 7267   | 4.86763 | 4.22686 | 3.41528 | 3.37802 | -0.4007 | 0.002052  | 0.0095139 | Down-regulated |
| NM_002338    | LSAMP         | 4045   | 3.35582 | 3.42682 | 2.37874 | 2.68367 | -0.4014 | 0.0019905 | 0.0092591 | Down-regulated |
| NM_002197    | ACO1          | 48     | 13.3124 | 12.6618 | 9.14142 | 10.2915 | -0.402  | 0.0004875 | 0.0026927 | Down-regulated |
| NM_001286659 | TBC1D4        | 9882   | 8.31512 | 8.43721 | 6.05362 | 6.50496 | -0.4022 | 3.50E-05  | 0.0002475 | Down-regulated |
| NM_015229    | CLUH          | 23277  | 90.3135 | 95.7722 | 70.7461 | 69.3546 | -0.4025 | 2.17E-18  | 5.71E-17  | Down-regulated |
| NM_199129    | TMEM189       | 387521 | 26.3421 | 30.7953 | 22.4102 | 20.2794 | -0.4025 | 0.000801  | 0.0041976 | Down-regulated |
| NM_000620    | HBS1L         | 10767  | 7.82378 | 7.71642 | 5.50697 | 6.14307 | -0.4028 | 6.37E-05  | 0.0004263 | Down-regulated |
| NM_022341    | ochondrial)(F | 64146  | 28.461  | 33.4099 | 23.9659 | 21.9607 | -0.4038 | 0.0081815 | 0.0312775 | Down-regulated |
| NM_198066    | GNPNA1T1      | 64841  | 12.5661 | 12.363  | 9.21435 | 9.46256 | -0.4041 | 3.41E-05  | 0.0002413 | Down-regulated |
| NM_013382    | POMT2         | 29954  | 13.0898 | 12.7148 | 10.111  | 9.22637 | -0.4042 | 1.67E-05  | 0.0001257 | Down-regulated |
| NM_032315    | SLC25A33      | 84275  | 26.4446 | 26.3948 | 19.6704 | 19.733  | -0.4045 | 0.0006566 | 0.0035122 | Down-regulated |
| NM_015131    | WDR43         | 23160  | 25.043  | 23.6642 | 17.7755 | 18.7512 | -0.4048 | 4.23E-07  | 4.13E-06  | Down-regulated |
| NM_000696    | ALDH9A1       | 223    | 28.7069 | 28.5    | 20.2615 | 22.5554 | -0.4056 | 1.48E-05  | 0.0001128 | Down-regulated |
| NM_001195427 | SRSF2         | 6427   | 91.3401 | 88.4513 | 67.3701 | 67.5762 | -0.4058 | 1.33E-13  | 2.53E-12  | Down-regulated |
| NM_033428    | TMEM261       | 90871  | 16.6113 | 16.7871 | 12.1005 | 12.8471 | -0.406  | 0.0002707 | 0.0015836 | Down-regulated |
| NM_003017    | SRSF3         | 6428   | 86.2302 | 80.6823 | 61.2491 | 63.993  | -0.406  | 9.30E-13  | 1.63E-11  | Down-regulated |
| NM_021128    | POLR2L        | 5441   | 156.013 | 146.077 | 106.688 | 119.152 | -0.4061 | 6.49E-06  | 5.31E-05  | Down-regulated |
| NM_001002257 | LCLAT1        | 253558 | 4.59507 | 5.24578 | 3.7556  | 3.53755 | -0.4062 | 0.0094963 | 0.0354295 | Down-regulated |
| NM_018656    | SLC35E3       | 55508  | 9.61903 | 9.96496 | 7.37684 | 7.12645 | -0.407  | 0.0073353 | 0.0285101 | Down-regulated |
| NM_003905    | NAE1          | 8883   | 42.3083 | 39.4428 | 29.5389 | 31.5776 | -0.407  | 1.12E-05  | 8.77E-05  | Down-regulated |
| NM_032907    | UBL7          | 84993  | 52.4408 | 49.4434 | 38.5104 | 37.645  | -0.4075 | 4.81E-06  | 4.03E-05  | Down-regulated |
| NM_002823    | PTMA          | 5757   | 780.359 | 753.26  | 559.93  | 589.759 | -0.4076 | 1.75E-21  | 5.56E-20  | Down-regulated |
| NM_031484    | MARVELD1      | 83742  | 38.0417 | 39.2974 | 29.5948 | 28.3338 | -0.4081 | 4.19E-10  | 5.81E-09  | Down-regulated |
| NM_080476    | PIGU          | 128869 | 21.6095 | 22.8163 | 17.4397 | 15.6081 | -0.4082 | 0.0011217 | 0.0056429 | Down-regulated |
| NM_014763    | MRPL19        | 9801   | 5.70957 | 5.65875 | 4.17402 | 4.3126  | -0.4082 | 4.97E-05  | 0.0003409 | Down-regulated |
| NM_001174081 | NLRP2         | 55655  | 7.92524 | 8.2056  | 5.86843 | 6.13236 | -0.4085 | 0.0020263 | 0.009411  | Down-regulated |
| NM_020188    | CMC2          | 56942  | 102.506 | 95.9198 | 72.1472 | 75.5078 | -0.4087 | 0.0001115 | 0.0007114 | Down-regulated |
| NM_005931    | MICB          | 4277   | 10.735  | 9.51323 | 7.6673  | 7.30176 | -0.4087 | 0.0078003 | 0.0300113 | Down-regulated |
| NM_033375    | MYO1C         | 4641   | 38.7011 | 38.4925 | 28.8265 | 29.0312 | -0.4088 | 2.73E-16  | 6.29E-15  | Down-regulated |
| NM_001931    | DLAT          | 1737   | 18.1654 | 19.5225 | 13.1704 | 14.9611 | -0.4091 | 3.37E-05  | 0.000239  | Down-regulated |
| NM_004255    | COX5A         | 9377   | 224.555 | 201.287 | 158.555 | 159.132 | -0.4093 | 5.90E-07  | 5.65E-06  | Down-regulated |
| NM_015933    | TMA7          | 51372  | 432.238 | 396.572 | 315.747 | 302.503 | -0.4093 | 3.17E-08  | 3.54E-07  | Down-regulated |
| NM_003940    | tidase T-3)(L | 8975   | 7.21666 | 7.82149 | 5.43301 | 5.78933 | -0.4096 | 2.76E-05  | 0.0001992 | Down-regulated |
| NM_005861    | STUB1         | 10273  | 75.9592 | 77.3259 | 58.2699 | 56.2984 | -0.4102 | 5.73E-10  | 7.78E-09  | Down-regulated |
| NM_001012994 | SNX30         | 401548 | 11.9526 | 11.8833 | 8.97749 | 8.83546 | -0.4109 | 2.80E-09  | 3.52E-08  | Down-regulated |
| NM_018107    | RBM23         | 55147  | 8.25651 | 9.09149 | 6.56386 | 6.2517  | -0.4109 | 0.0102001 | 0.0376823 | Down-regulated |
| NM_001005    | RPS3          | 6188   | 172.959 | 160.651 | 121.39  | 127.978 | -0.4114 | 9.79E-13  | 1.71E-11  | Down-regulated |
| NM_001084392 | DDT           | 1652   | 233.186 | 223.779 | 174.332 | 166.047 | -0.4114 | 1.81E-07  | 1.87E-06  | Down-regulated |
| NM_001297704 | ADGRL2        | 23266  | 5.54205 | 5.84862 | 3.74483 | 4.67184 | -0.412  | 0.0067856 | 0.026634  | Down-regulated |
| NM_003249    | THOP1         | 7064   | 40.2465 | 43.4921 | 33.0323 | 29.366  | -0.412  | 6.55E-06  | 5.35E-05  | Down-regulated |
| NM_012203    | GRHPR         | 9380   | 80.3234 | 77.1047 | 61.0061 | 56.3283 | -0.4122 | 1.03E-06  | 9.55E-06  | Down-regulated |
| NM_014062    | NOB1          | 28987  | 51.5321 | 51.1871 | 38.3155 | 38.3372 | -0.4123 | 2.09E-08  | 2.40E-07  | Down-regulated |
| NM_199185    | NPM1          | 4869   | 42.9687 | 34.896  | 29.1051 | 28.4895 | -0.4123 | 0.0029393 | 0.0129457 | Down-regulated |
| NM_004708    | PDCD5         | 9141   | 279.531 | 262.878 | 187.117 | 215.488 | -0.4124 | 3.37E-05  | 0.000239  | Down-regulated |
| NM_015423    | AASDHPPT      | 60496  | 17.4023 | 16.4105 | 12.7899 | 12.3652 | -0.4126 | 7.08E-05  | 0.0004699 | Down-regulated |
| NM_014984    | CEP131        | 22994  | 19.1603 | 19.8643 | 15.7137 | 13.2876 | -0.4127 | 0.0001731 | 0.0010572 | Down-regulated |
| NM_138421    | SAAL1         | 113174 | 31.473  | 32.4234 | 23.8857 | 23.6375 | -0.4129 | 8.42E-05  | 0.0005497 | Down-regulated |
| NM_025072    | PTGES2        | 80142  | 22.6112 | 22.7058 | 17.5736 | 16.1084 | -0.413  | 5.94E-05  | 0.0003998 | Down-regulated |
| NM_152926    | CPNE1         | 8904   | 36.517  | 35.0043 | 26.4971 | 26.7618 | -0.4134 | 1.24E-06  | 1.14E-05  | Down-regulated |
| NM_133259    | LRPPRC        | 10128  | 33.3305 | 34.3365 | 25.1796 | 25.3697 | -0.4134 | 5.95E-18  | 1.53E-16  | Down-regulated |
| NM_014502    | PRPF19        | 27339  | 53.9332 | 51.7622 | 39.6736 | 39.1758 | -0.4135 | 1.63E-10  | 2.37E-09  | Down-regulated |
| NM_003562    | SLC25A11      | 8402   | 71.0072 | 65.4646 | 52.4427 | 49.2254 | -0.4139 | 1.44E-07  | 1.50E-06  | Down-regulated |
| NM_014641    | MDC1          | 9656   | 7.30918 | 7.95471 | 5.75284 | 5.60683 | -0.4141 | 2.30E-05  | 0.0001687 | Down-regulated |
| NM_001005373 | LRSAM1        | 90678  | 6.35059 | 6.73079 | 4.68145 | 4.95108 | -0.4146 | 0.0099371 | 0.0368153 | Down-regulated |
| NM_004041    | ARRB1         | 408    | 4.67088 | 5.369   | 4.10362 | 3.2888  | -0.4147 | 0.0087088 | 0.0329112 | Down-regulated |
| NM_014611    | MDN1          | 23195  | 4.04049 | 4.10696 | 3.01439 | 3.05554 | -0.415  | 4.71E-08  | 5.18E-07  | Down-regulated |
| NR_024542    | SNHG7         | 84973  | 99.729  | 102.731 | 78.2551 | 72.2125 | -0.415  | 1.40E-06  | 1.27E-05  | Down-regulated |
| NM_001258379 | SLC4A7        | 9497   | 8.81277 | 8.06691 | 6.79476 | 5.71372 | -0.4153 | 0.000434  | 0.0024257 | Down-regulated |
| NM_001128148 | TFRC          | 7037   | 358.532 | 367.807 | 268.973 | 273.3   | -0.4154 | 6.26E-43  | 4.60E-41  | Down-regulated |
| NM_153188    | TNPO1         | 3842   | 22.6078 | 19.7798 | 14.2996 | 17.147  | -0.4158 | 9.98E-05  | 0.000643  | Down-regulated |
| NM_006708    | GLO1          | 2739   | 93.6719 | 88.063  | 65.9787 | 69.3852 | -0.4159 | 5.01E-11  | 7.58E-10  | Down-regulated |
| NM_003581    | NCK2          | 8440   | 49.8421 | 48.318  | 35.847  | 37.2827 | -0.4159 | 1.92E-10  | 2.77E-09  | Down-regulated |
| NM_015302    | HAUS5         | 23354  | 8.55416 | 9.84491 | 6.83893 | 6.78009 | -0.4161 | 0.0010859 | 0.005489  | Down-regulated |
| NM_014268    | MAPRE2        | 10982  | 17.0508 | 16.9128 | 12.106  | 13.1412 | -0.4162 | 1.41E-06  | 1.28E-05  | Down-regulated |
| NM_014051    | TMEM14A       | 28978  | 50.7215 | 45.954  | 35.5908 | 35.8865 | -0.4162 | 0.0005689 | 0.0030883 | Down-regulated |
| NM_178229    | IQGAP3        | 128239 | 7.73835 | 8.55624 | 5.68901 | 6.37708 | -0.4166 | 0.000393  | 0.0022171 | Down-regulated |
| NM_001100624 | CENPN         | 55839  | 6.06123 | 5.39898 | 4.22325 | 4.23426 | -0.4167 | 0.0037445 | 0.015995  | Down-regulated |
| NM_144609    | CCDC43        | 124808 | 23.3655 | 23.55   | 17.2679 | 17.5316 | -0.417  | 2.78E-05  | 0.0002004 | Down-regulated |
| NM_024102    | WDR77         | 79084  | 22.9691 | 24.8344 | 17.8551 | 17.6088 | -0.4174 | 1.66E-05  | 0.0001251 | Down-regulated |
| NM_002266    | KPNA2         | 3838   | 160.956 | 153.372 | 114.673 | 119.267 | -0.4181 | 3.07E-17  | 7.51E-16  | Down-regulated |

|              |                |        |         |         |         |         |         |           |           |                |
|--------------|----------------|--------|---------|---------|---------|---------|---------|-----------|-----------|----------------|
| NM_001031703 | ELP6           | 54859  | 38.5074 | 35.4605 | 28.2552 | 26.4019 | -0.4184 | 0.0002833 | 0.0016498 | Down-regulated |
| NM_173659    | RPUSD3         | 285367 | 92.774  | 88.3874 | 68.6483 | 65.8598 | -0.4186 | 2.76E-08  | 3.11E-07  | Down-regulated |
| NM_001321967 | ATAD1          | 84896  | 6.14322 | 5.90777 | 4.33744 | 4.54161 | -0.4187 | 0.0024474 | 0.0110839 | Down-regulated |
| NM_007176    | C14orf1        | 11161  | 42.605  | 42.2322 | 29.4127 | 33.382  | -0.4187 | 7.00E-05  | 0.0004655 | Down-regulated |
| NM_000320    | QDPR           | 5860   | 221.029 | 210.94  | 159.903 | 161.495 | -0.4188 | 4.62E-20  | 1.38E-18  | Down-regulated |
| NM_015004    | EXOSC7         | 23016  | 52.7174 | 49.9771 | 35.4169 | 40.3932 | -0.4189 | 0.0006921 | 0.0036844 | Down-regulated |
| NR_033338    | FAAP100        | 80233  | 7.50779 | 7.94163 | 5.78613 | 5.60764 | -0.4192 | 0.0013222 | 0.0065315 | Down-regulated |
| NM_001206736 | NSFL1C         | 55968  | 7.98957 | 7.07285 | 5.20851 | 5.85913 | -0.4198 | 0.0064456 | 0.0254614 | Down-regulated |
| NM_005969    | NAP1L4         | 4676   | 78.8048 | 75.4309 | 58.4877 | 56.1218 | -0.4199 | 1.72E-13  | 3.23E-12  | Down-regulated |
| NM_0022166   | MLH1           | 4292   | 21.7606 | 22.2872 | 15.7156 | 16.8959 | -0.4201 | 1.20E-05  | 9.27E-05  | Down-regulated |
| NM_022832    | USP46          | 64854  | 3.24546 | 3.36185 | 2.30173 | 2.55494 | -0.4201 | 0.0029886 | 0.0131239 | Down-regulated |
| NM_005839    | SRRM1          | 10250  | 9.51286 | 10.6008 | 7.94605 | 6.85834 | -0.4202 | 0.0020929 | 0.0096755 | Down-regulated |
| NM_015679    | TRUB2          | 26995  | 57.6262 | 51.5021 | 41.5164 | 39.3254 | -0.4202 | 3.60E-06  | 3.07E-05  | Down-regulated |
| NM_0022566   | MESDC1         | 59274  | 107.012 | 103.376 | 81.8938 | 74.3667 | -0.4203 | 9.04E-12  | 1.45E-10  | Down-regulated |
| NM_000159    | GCDH           | 2639   | 21.6302 | 18.3583 | 15.163  | 14.2183 | -0.4212 | 0.0030157 | 0.0132221 | Down-regulated |
| NM_001281715 | PHB            | 5245   | 22.8887 | 22.2554 | 14.3523 | 18.6786 | -0.4219 | 0.0069324 | 0.0271205 | Down-regulated |
| NM_0022166   | XYLT1          | 64131  | 8.06838 | 8.59002 | 6.40258 | 5.93509 | -0.4219 | 1.29E-06  | 1.18E-05  | Down-regulated |
| NM_001346813 | M_00134681     | NA     | 5.3308  | 6.17686 | 3.78941 | 4.67048 | -0.4222 | 0.0028382 | 0.0125689 | Down-regulated |
| NM_139215    | TAF15          | 8148   | 74.2197 | 71.521  | 54.9408 | 53.1515 | -0.4222 | 1.25E-12  | 2.15E-11  | Down-regulated |
| NM_005789    | PSME3          | 10197  | 67.0875 | 61.6742 | 48.0436 | 47.4514 | -0.4224 | 4.83E-12  | 7.92E-11  | Down-regulated |
| NM_001135654 | tein cytoplasm | 8761   | 20.2029 | 17.8226 | 14.5248 | 13.5326 | -0.423  | 0.0001245 | 0.000786  | Down-regulated |
| NM_022731    | NUCKS1         | 64710  | 40.1352 | 40.2324 | 29.5282 | 30.1156 | -0.4232 | 1.68E-22  | 5.62E-21  | Down-regulated |
| NM_017751    | SMPD4          | 55627  | 21.7701 | 19.8103 | 15.2385 | 15.4915 | -0.4239 | 1.11E-06  | 1.03E-05  | Down-regulated |
| NM_007006    | NUDT21         | 11051  | 18.6688 | 17.931  | 13.4781 | 13.6068 | -0.424  | 2.89E-08  | 3.24E-07  | Down-regulated |
| NM_198935    | SS18L1         | 26039  | 9.93771 | 10.2013 | 8.04522 | 6.76236 | -0.4242 | 0.0007949 | 0.0041724 | Down-regulated |
| NM_004040    | RHOB           | 388    | 51.468  | 46.7967 | 37.5003 | 35.138  | -0.4245 | 2.70E-07  | 2.70E-06  | Down-regulated |
| NM_018126    | TMEM33         | 55161  | 16.3722 | 16.7998 | 12.723  | 11.8305 | -0.4249 | 4.25E-10  | 5.87E-09  | Down-regulated |
| NM_003405    | YWHAH          | 7533   | 68.1821 | 65.2384 | 49.2788 | 49.4284 | -0.425  | 2.83E-10  | 4.01E-09  | Down-regulated |
| NM_032581    | FAM126A        | 84668  | 8.84664 | 8.42021 | 6.13261 | 6.60929 | -0.4252 | 2.01E-05  | 0.0001488 | Down-regulated |
| NM_001031701 | NTSDC3         | 51559  | 4.42927 | 5.37088 | 3.79591 | 3.36922 | -0.4252 | 0.0054618 | 0.0221426 | Down-regulated |
| NM_001256378 | MCMBP          | 79892  | 7.81428 | 6.88327 | 5.55321 | 5.22613 | -0.4253 | 0.0021569 | 0.0099257 | Down-regulated |
| NM_001318525 | TRAPP2L        | 51693  | 15.329  | 15.4125 | 10.774  | 11.7929 | -0.4255 | 0.0009197 | 0.0047522 | Down-regulated |
| NM_007221    | PMF1           | 11243  | 64.2696 | 58.6436 | 44.8948 | 45.6598 | -0.4259 | 2.38E-05  | 0.0001739 | Down-regulated |
| NM_006716    | DBF4           | 10926  | 7.41544 | 7.17711 | 4.81994 | 5.82688 | -0.4262 | 0.0059027 | 0.0236096 | Down-regulated |
| NM_006441    | rofolate cycl  | 10588  | 16.572  | 16.1536 | 11.9459 | 12.1324 | -0.4265 | 0.0002073 | 0.0012451 | Down-regulated |
| NM_006219    | PIK3CB         | 5291   | 10.3073 | 10.3794 | 7.67277 | 7.59222 | -0.4266 | 5.42E-07  | 5.22E-06  | Down-regulated |
| NM_003884    | KAT2B          | 8850   | 24.933  | 24.3631 | 17.5151 | 18.9219 | -0.4267 | 1.42E-09  | 1.84E-08  | Down-regulated |
| NM_0241103   | SLC25A23       | 79085  | 36.8818 | 37.1759 | 27.8587 | 26.8885 | -0.4268 | 4.78E-12  | 7.84E-11  | Down-regulated |
| NM_006796    | AFG3L2         | 10939  | 37.4404 | 37.9736 | 27.9287 | 27.8337 | -0.4269 | 5.40E-12  | 8.85E-11  | Down-regulated |
| NM_033251    | RPL13          | 6137   | 69.542  | 67.4194 | 50.1134 | 51.2214 | -0.4275 | 2.23E-23  | 7.87E-22  | Down-regulated |
| NM_199478    | PLP1           | 5354   | 95.6508 | 99.7484 | 71.274  | 73.2008 | -0.4282 | 9.12E-19  | 2.47E-17  | Down-regulated |
| NM_002138    | HNRNPD         | 3184   | 64.5199 | 61.9099 | 44.0849 | 49.147  | -0.4283 | 7.06E-08  | 7.58E-07  | Down-regulated |
| NM_021204    | ENOPH1         | 58478  | 23.6215 | 24.1997 | 17.9962 | 17.1777 | -0.4287 | 1.67E-05  | 0.0001252 | Down-regulated |
| NM_182981    | OSGIN1         | 29948  | 15.0028 | 14.5868 | 11.4584 | 10.1488 | -0.4288 | 0.0033363 | 0.0144483 | Down-regulated |
| NM_213720    | CHCHD10        | 400916 | 383.099 | 351.364 | 277.423 | 263.409 | -0.4291 | 1.35E-09  | 1.76E-08  | Down-regulated |
| NM_016408    | CDK5RAP1       | 51654  | 19.0707 | 21.5647 | 14.743  | 15.0641 | -0.4294 | 0.0004739 | 0.0026282 | Down-regulated |
| NM_001301861 | BOC            | 91653  | 9.14433 | 9.55848 | 7.08145 | 6.6466  | -0.4294 | 0.000141  | 0.0008814 | Down-regulated |
| NM_002893    | RBBP7          | 5931   | 66.8927 | 63.837  | 47.5782 | 48.8545 | -0.4296 | 5.17E-11  | 7.82E-10  | Down-regulated |
| NM_014849    | SV2A           | 9900   | 8.06132 | 9.14333 | 6.31166 | 6.28192 | -0.43   | 0.0006739 | 0.0035976 | Down-regulated |
| NM_005049    | yeast(PWP2     | 5822   | 19.005  | 18.4353 | 14.2473 | 13.2989 | -0.43   | 3.85E-06  | 3.26E-05  | Down-regulated |
| NM_021121    | EEF1B2         | 1933   | 49.2452 | 47.3069 | 38.55   | 31.6982 | -0.4301 | 0.0057522 | 0.0230849 | Down-regulated |
| NM_020471    | ZFYVE21        | 79038  | 15.5533 | 14.58   | 10.7281 | 11.1478 | -0.4306 | 0.0095677 | 0.0356354 | Down-regulated |
| NM_012234    | RYBP           | 23429  | 17.8168 | 16.1624 | 12.1254 | 12.8647 | -0.4308 | 3.23E-06  | 2.77E-05  | Down-regulated |
| NM_005033    | EXOSC9         | 5393   | 16.9017 | 16.0329 | 11.9266 | 12.054  | -0.431  | 0.0034994 | 0.015076  | Down-regulated |
| NM_012385    | NUPR1          | 26471  | 376.057 | 346.717 | 266.316 | 265.759 | -0.4314 | 1.08E-12  | 1.89E-11  | Down-regulated |
| NM_006745    | MSMO1          | 6307   | 55.3277 | 56.4328 | 39.9698 | 42.3777 | -0.4314 | 1.97E-10  | 2.83E-09  | Down-regulated |
| NM_031210    | SLIRP          | 81892  | 375.713 | 331.619 | 256.658 | 258.076 | -0.4318 | 0.0002923 | 0.0016976 | Down-regulated |
| NM_020162    | DHX33          | 56919  | 27.3755 | 29.3387 | 22.6628 | 18.9731 | -0.4321 | 1.23E-05  | 9.53E-05  | Down-regulated |
| NM_001128591 | PSMG4          | 389362 | 40.2863 | 40.2003 | 29.4161 | 29.0828 | -0.4322 | 0.0030223 | 0.0132446 | Down-regulated |
| NM_022553    | VPS52          | 6293   | 11.8315 | 10.2019 | 8.45801 | 7.59807 | -0.4323 | 0.0032085 | 0.0139394 | Down-regulated |
| NM_002567    | PEBP1          | 5037   | 189.102 | 189.269 | 135.899 | 142.869 | -0.4327 | 8.32E-20  | 2.43E-18  | Down-regulated |
| NM_005400    | PRKCE          | 5581   | 4.3027  | 4.44266 | 3.14475 | 3.22702 | -0.433  | 0.0023167 | 0.0105416 | Down-regulated |
| NM_001959    | EEF1B2         | 1933   | 69.9817 | 62.8291 | 48.9724 | 48.2499 | -0.4337 | 2.08E-05  | 0.0001537 | Down-regulated |
| NM_020718    | USP31          | 57478  | 2.34146 | 2.18018 | 1.63575 | 1.65744 | -0.434  | 0.0022943 | 0.0104548 | Down-regulated |
| NM_024839    | RPP21          | 79897  | 74.6687 | 71.0473 | 53.8585 | 51.599  | -0.4345 | 0.005428  | 0.0220196 | Down-regulated |
| NM_018082    | POLR3B         | 55703  | 6.3267  | 5.99521 | 4.60529 | 4.35476 | -0.4345 | 0.0019028 | 0.0089044 | Down-regulated |
| NM_015544    | TMEM98         | 26022  | 39.9451 | 37.9704 | 30.9102 | 26.0745 | -0.4345 | 0.0001615 | 0.0009935 | Down-regulated |
| NM_003146    | SSRP1          | 6749   | 78.4237 | 74.3274 | 57.0322 | 55.313  | -0.435  | 4.79E-15  | 1.02E-13  | Down-regulated |
| NM_138395    | MARS2          | 92935  | 7.24824 | 6.83264 | 5.15915 | 5.07508 | -0.435  | 0.0050125 | 0.0205434 | Down-regulated |
| NM_001330523 | PYCR1          | 5831   | 24.9701 | 19.6523 | 16.4458 | 15.8786 | -0.4351 | 0.0063435 | 0.0251256 | Down-regulated |
| NM_005445    | SMC3           | 9126   | 16.1215 | 15.5738 | 11.0276 | 12.1882 | -0.4354 | 4.81E-06  | 4.03E-05  | Down-regulated |
| NM_018660    | ZNF395         | 55893  | 8.01904 | 7.74618 | 5.64591 | 5.86568 | -0.436  | 0.0001146 | 0.0007294 | Down-regulated |
| NR_047665    | EPS15L1        | 58513  | 16.3217 | 14.5634 | 12.3655 | 10.089  | -0.4361 | 0.0020915 | 0.0096716 | Down-regulated |
| NM_006379    | SEMA3C         | 10512  | 7.82633 | 7.6849  | 5.46329 | 5.85924 | -0.4369 | 8.81E-05  | 0.0005728 | Down-regulated |
| NM_016063    | HDCC2          | 51020  | 47.5238 | 43.2514 | 32.2594 | 34.1426 | -0.4371 | 7.44E-06  | 6.02E-05  | Down-regulated |
| NM_030914    | URM1           | 81605  | 32.2423 | 31.9794 | 23.3505 | 23.7695 | -0.4371 | 4.49E-09  | 5.56E-08  | Down-regulated |
| NM_003903    | CDC16          | 8881   | 37.6361 | 33.9634 | 26.7353 | 25.6852 | -0.4374 | 1.70E-06  | 1.52E-05  | Down-regulated |
| NM_007106    | UBL3           | 5412   | 18.476  | 17.3438 | 13.1278 | 13.1136 | -0.4376 | 6.71E-08  | 7.23E-07  | Down-regulated |
| NM_006614    | CHL1           | 10752  | 5.6443  | 5.75396 | 3.97134 | 4.35735 | -0.4379 | 4.17E-05  | 0.0002892 | Down-regulated |
| NM_015241    | MICAL3         | 57553  | 9.49683 | 10.5565 | 7.79241 | 6.86246 | -0.438  | 1.39E-05  | 0.0001062 | Down-regulated |
| NM_001040023 | SIRPA          | 140885 | 23.7702 | 25.4933 | 18.6486 | 17.435  | -0.438  | 5.31E-08  | 5.81E-07  | Down-regulated |
| NM_005845    | ABCC4          | 10257  | 8.06207 | 8.19172 | 5.95751 | 5.92286 | -0.438  | 7.50E-06  | 6.05E-05  | Down-regulated |
| NM_005563    | STMN1          | 3925   | 217.156 | 202.749 | 147.837 | 160.039 | -0.4381 | 6.89E-12  | 1.12E-10  | Down-regulated |
| NM_001330518 | PCYT2          | 5833   | 3.85797 | 3.69013 | 2.71519 | 2.73457 | -0.4386 | 0.0064995 | 0.0256528 | Down-regulated |

|              |               |        |         |         |         |         |         |           |           |                |
|--------------|---------------|--------|---------|---------|---------|---------|---------|-----------|-----------|----------------|
| NM_052965    | TSEN15        | 116461 | 12.9472 | 12.7453 | 8.83623 | 9.77784 | -0.4389 | 0.0037648 | 0.0160675 | Down-regulated |
| NM_001006935 | TCEAL4        | 79921  | 90.4881 | 76.8969 | 59.0468 | 62.9954 | -0.4393 | 3.30E-05  | 0.0002346 | Down-regulated |
| NM_015902    | UBR5          | 51366  | 11.2206 | 10.9819 | 8.7464  | 7.48528 | -0.4394 | 1.63E-06  | 1.46E-05  | Down-regulated |
| NM_033387    | FAM78A        | 286336 | 4.75544 | 5.32377 | 3.7849  | 3.47781 | -0.4395 | 0.0105443 | 0.0387368 | Down-regulated |
| NM_005766    | FARP1         | 10160  | 20.3427 | 22.4383 | 15.3387 | 15.9576 | -0.4397 | 7.03E-08  | 7.56E-07  | Down-regulated |
| NM_001099285 | PTMA          | 5757   | 99.1548 | 86.6027 | 68.2981 | 67.3023 | -0.4397 | 3.11E-06  | 2.68E-05  | Down-regulated |
| NM_080598    | DDX39B        | 7919   | 48.7448 | 52.3314 | 36.9937 | 36.9543 | -0.4397 | 1.03E-08  | 1.22E-07  | Down-regulated |
| NM_152299    | NCAPH2        | 29781  | 17.3376 | 16.5711 | 11.8319 | 12.9117 | -0.4401 | 1.16E-05  | 9.02E-05  | Down-regulated |
| NM_001330231 | NAP1L1        | 4673   | 10.6368 | 9.37496 | 7.39781 | 7.1639  | -0.4406 | 0.0001541 | 0.0009542 | Down-regulated |
| NM_001004317 | LIN28B        | 389421 | 7.20328 | 7.45428 | 5.26    | 5.42733 | -0.4409 | 5.13E-05  | 0.0003508 | Down-regulated |
| NM_001116    | ADCY9         | 115    | 8.26385 | 9.52689 | 6.60426 | 6.36551 | -0.4413 | 2.91E-05  | 0.0002088 | Down-regulated |
| NM_006461    | SPAG5         | 10615  | 19.1506 | 18.683  | 13.3366 | 14.2977 | -0.4413 | 2.39E-07  | 2.41E-06  | Down-regulated |
| NM_000254    | MTR           | 4548   | 7.93834 | 7.74359 | 5.88144 | 5.58817 | -0.4413 | 6.80E-09  | 8.25E-08  | Down-regulated |
| NM_006283    | TACC1         | 6867   | 8.30444 | 9.38267 | 6.31314 | 6.58037 | -0.4417 | 1.01E-05  | 7.93E-05  | Down-regulated |
| NM_176806    | MOCS2         | 4338   | 8.27629 | 9.07851 | 6.91878 | 5.60404 | -0.4418 | 0.005329  | 0.0216964 | Down-regulated |
| NM_019042    | mutative)(PUS | 54517  | 13.4087 | 11.0218 | 8.53699 | 9.15289 | -0.4419 | 0.0017262 | 0.0082048 | Down-regulated |
| NM_003689    | AKR7A2        | 8574   | 24.6413 | 23.4002 | 17.0303 | 18.0098 | -0.4419 | 2.15E-06  | 1.90E-05  | Down-regulated |
| NM_007019    | UBE2C         | 11065  | 36.5314 | 31.8904 | 26.0076 | 23.126  | -0.4421 | 0.0112054 | 0.0407811 | Down-regulated |
| NM_021177    | LSM2          | 57819  | 45.8804 | 42.3419 | 28.4846 | 34.9749 | -0.4427 | 0.0068554 | 0.0268579 | Down-regulated |
| NM_005866    | SIGMAR1       | 10280  | 87.4409 | 91.5359 | 70.0813 | 60.4182 | -0.4429 | 8.09E-07  | 7.63E-06  | Down-regulated |
| NM_152729    | NT5DC1        | 221294 | 7.18337 | 6.55675 | 4.53611 | 5.33222 | -0.4429 | 0.0107043 | 0.0392641 | Down-regulated |
| NM_001003891 | MED15         | 51586  | 19.221  | 15.6643 | 14.5895 | 10.4295 | -0.4435 | 0.0138749 | 0.0487958 | Down-regulated |
| NM_017503    | SURF2         | 6835   | 32.4387 | 30.5404 | 23.869  | 21.3981 | -0.4436 | 0.0096496 | 0.0358845 | Down-regulated |
| NM_001082486 | ACD           | 65057  | 17.3643 | 20.2234 | 13.8712 | 13.3058 | -0.4438 | 0.0011704 | 0.0058632 | Down-regulated |
| NM_006403    | NEDD9         | 4739   | 11.1266 | 10.3788 | 8.18191 | 7.44159 | -0.4442 | 5.61E-05  | 0.0003804 | Down-regulated |
| NM_016094    | COMMD2        | 51122  | 9.23152 | 8.82393 | 6.36175 | 6.73526 | -0.4444 | 0.0003409 | 0.0019526 | Down-regulated |
| NM_000386    | BLMH          | 642    | 30.6633 | 30.6816 | 21.6421 | 23.0702 | -0.4445 | 7.83E-08  | 8.36E-07  | Down-regulated |
| NM_001271972 | HSP90AB1      | 3326   | 31.1424 | 22.5659 | 20.4531 | 18.1994 | -0.4445 | 0.0063835 | 0.0252473 | Down-regulated |
| NM_031444    | GUCD1         | 83606  | 4.96804 | 4.62638 | 3.29534 | 3.58786 | -0.4446 | 0.01256   | 0.0449242 | Down-regulated |
| NM_000859    | HMGCR         | 3156   | 38.3112 | 40.34   | 28.6564 | 28.7902 | -0.445  | 4.46E-15  | 9.54E-14  | Down-regulated |
| NM_198076    | COX20         | 116228 | 20.8583 | 17.3705 | 15.2179 | 12.3068 | -0.445  | 0.0042306 | 0.0177261 | Down-regulated |
| NM_014331    | SLC7A11       | 23657  | 22.5389 | 24.3645 | 16.4839 | 17.7217 | -0.4461 | 3.01E-11  | 4.64E-10  | Down-regulated |
| NM_001040006 | TCERG1        | 10915  | 17.8659 | 19.4028 | 12.0975 | 14.9028 | -0.4465 | 0.0003025 | 0.0017517 | Down-regulated |
| NM_018030    | OSBPL1A       | 114876 | 11.7535 | 11.9193 | 8.74123 | 8.44686 | -0.447  | 6.42E-05  | 0.0004296 | Down-regulated |
| NM_001009932 | DNASE1L1      | 1774   | 8.64181 | 8.46389 | 5.37525 | 6.85532 | -0.4475 | 0.0103872 | 0.038243  | Down-regulated |
| NM_012152    | LPAR3         | 23566  | 17.5874 | 16.6441 | 12.6076 | 12.1364 | -0.4475 | 0.0012922 | 0.0064031 | Down-regulated |
| NM_022371    | TOR3A         | 64222  | 13.6128 | 16.5519 | 10.8544 | 10.8283 | -0.4476 | 0.0042308 | 0.0177261 | Down-regulated |
| NM_015073    | SIPA1L3       | 23094  | 6.00654 | 6.67039 | 4.60614 | 4.59345 | -0.448  | 2.55E-05  | 0.0001852 | Down-regulated |
| NM_003707    | RUVBL1        | 8607   | 47.8862 | 45.8354 | 33.8505 | 34.3004 | -0.448  | 2.66E-08  | 3.00E-07  | Down-regulated |
| NR_104318    | NUBP2         | 10101  | 38.6191 | 38.917  | 28.4447 | 27.6816 | -0.4483 | 6.86E-05  | 0.0004571 | Down-regulated |
| NM_001001555 | GRB10         | 2887   | 18.2333 | 18.9807 | 12.8113 | 14.2244 | -0.4488 | 1.33E-07  | 1.39E-06  | Down-regulated |
| NM_012247    | SEPHS1        | 22929  | 12.6242 | 12.5687 | 9.03826 | 9.20695 | -0.4493 | 3.34E-05  | 0.000237  | Down-regulated |
| NM_006094    | DLC1          | 10395  | 8.43173 | 9.07587 | 6.04596 | 6.63858 | -0.4496 | 2.61E-05  | 0.0001894 | Down-regulated |
| NM_001282280 | PYCR1         | 5831   | 56.5861 | 52.1974 | 44.4715 | 33.9368 | -0.4497 | 0.0009393 | 0.0048403 | Down-regulated |
| NM_002582    | ribonuclea    | 5073   | 16.0176 | 14.9998 | 11.6708 | 10.7757 | -0.4498 | 4.47E-05  | 0.0003088 | Down-regulated |
| NM_017749    | AMBRA1        | 55626  | 3.84386 | 3.4319  | 2.55613 | 2.63625 | -0.4501 | 0.009399  | 0.03511   | Down-regulated |
| NM_018356    | C5orf22       | 55322  | 11.9652 | 11.5901 | 8.95999 | 8.06786 | -0.4502 | 0.000105  | 0.000674  | Down-regulated |
| NM_001017371 | SP3           | 6670   | 4.58495 | 6.14606 | 3.72207 | 3.94086 | -0.4503 | 0.0116614 | 0.0421279 | Down-regulated |
| NM_024619    | FN3KRP        | 79672  | 19.7819 | 16.7025 | 13.5424 | 12.6373 | -0.4503 | 0.0029559 | 0.0130016 | Down-regulated |
| NM_006784    | WDR3          | 10885  | 18.0633 | 17.6871 | 11.9742 | 13.9207 | -0.4505 | 1.77E-05  | 0.0001323 | Down-regulated |
| NM_015084    | MRPS27        | 23107  | 28.0569 | 26.5717 | 19.1971 | 20.4379 | -0.4506 | 2.19E-07  | 2.22E-06  | Down-regulated |
| NM_000375    | UROS          | 7390   | 17.5482 | 15.9141 | 11.7673 | 12.1024 | -0.451  | 0.0073548 | 0.0285626 | Down-regulated |
| NM_015659    | RSL1D1        | 26156  | 27.5816 | 27.7182 | 19.8569 | 20.3586 | -0.4511 | 3.29E-15  | 7.10E-14  | Down-regulated |
| NM_030771    | CCDC34        | 91057  | 29.126  | 26.4904 | 18.734  | 21.3043 | -0.4513 | 0.0008849 | 0.0045995 | Down-regulated |
| NM_207356    | C1orf174      | 339448 | 13.1506 | 14.0635 | 9.97929 | 9.50309 | -0.4513 | 0.0052876 | 0.0215461 | Down-regulated |
| NM_018137    | PRMT6         | 55170  | 14.8398 | 13.1239 | 10.011  | 10.1405 | -0.4517 | 0.0004655 | 0.002587  | Down-regulated |
| NM_003488    | AKAP1         | 8165   | 24.1261 | 25.0598 | 18.9871 | 16.6389 | -0.4522 | 8.12E-07  | 7.65E-06  | Down-regulated |
| NM_003368    | USP1          | 7398   | 18.5931 | 17.2268 | 12.9211 | 13.0315 | -0.4523 | 2.57E-07  | 2.58E-06  | Down-regulated |
| NM_001196    | BID           | 637    | 13.3829 | 11.8027 | 9.24032 | 8.82697 | -0.4524 | 0.0026711 | 0.0119442 | Down-regulated |
| NM_001018069 | SERBP1        | 26135  | 22.6515 | 21.3057 | 16.0271 | 15.8991 | -0.4525 | 2.46E-13  | 4.56E-12  | Down-regulated |
| NM_001031734 | FDX1L         | 112812 | 36.101  | 42.1629 | 25.3733 | 30.2599 | -0.4536 | 0.0109032 | 0.0398484 | Down-regulated |
| NM_001282772 | POLR1B        | 84172  | 6.45206 | 5.63016 | 4.75103 | 3.89142 | -0.4537 | 0.005403  | 0.0219509 | Down-regulated |
| NM_001303037 | MPP6          | 51678  | 2.12787 | 2.25215 | 1.63424 | 1.4897  | -0.4537 | 0.009223  | 0.0345674 | Down-regulated |
| NM_003016    | SRSF2         | 6427   | 18.4129 | 19.5379 | 12.7311 | 14.6264 | -0.4539 | 6.59E-05  | 0.00044   | Down-regulated |
| NM_014865    | NCAPD2        | 9918   | 22.1624 | 22.2506 | 16.0059 | 16.2121 | -0.454  | 2.51E-12  | 4.22E-11  | Down-regulated |
| NM_016395    | HACD3         | 51495  | 68.3285 | 67.9438 | 49.749  | 49.2057 | -0.4541 | 7.66E-22  | 2.49E-20  | Down-regulated |
| NM_024654    | NOL9          | 79707  | 5.00898 | 5.34996 | 3.72539 | 3.73854 | -0.4548 | 0.0001426 | 0.0008905 | Down-regulated |
| NM_014637    | MTFR1         | 9650   | 20.128  | 19.1519 | 13.9083 | 14.4274 | -0.4555 | 3.81E-06  | 3.23E-05  | Down-regulated |
| NM_001614    | ACTG1         | 71     | 1603.75 | 1588.67 | 1162.02 | 1155.43 | -0.4556 | 6.25E-78  | 1.02E-75  | Down-regulated |
| NM_004175    | SNRPD3        | 6634   | 55.0287 | 51.4461 | 37.257  | 39.8796 | -0.4556 | 2.50E-12  | 4.20E-11  | Down-regulated |
| NM_016080    | GLOD4         | 51031  | 95.4955 | 90.2327 | 67.3051 | 67.2365 | -0.4561 | 4.91E-14  | 9.70E-13  | Down-regulated |
| NM_001099638 | ZNF146        | 7705   | 5.34356 | 6.2449  | 4.26887 | 4.09656 | -0.4564 | 0.0086126 | 0.0326315 | Down-regulated |
| NM_0001821   | CHML          | 1122   | 6.27082 | 6.4627  | 4.46444 | 4.71156 | -0.4573 | 1.05E-05  | 8.23E-05  | Down-regulated |
| NM_004457    | ACSL3         | 2181   | 32.9889 | 34.7547 | 25.2854 | 23.7362 | -0.4574 | 1.29E-11  | 2.04E-10  | Down-regulated |
| NM_000373    | UMPS          | 7372   | 5.01562 | 5.32432 | 3.82582 | 3.60124 | -0.4577 | 0.0001704 | 0.0010415 | Down-regulated |
| NM_004282    | BAG2          | 9532   | 24.6312 | 22.814  | 16.6995 | 17.4359 | -0.4579 | 2.90E-05  | 0.0002083 | Down-regulated |
| NM_006500    | MCAM          | 4162   | 107.094 | 111.568 | 79.1528 | 79.1989 | -0.4583 | 4.36E-26  | 1.80E-24  | Down-regulated |
| NM_014251    | SLC25A13      | 10165  | 66.0645 | 64.6875 | 46.9764 | 47.6526 | -0.4585 | 1.39E-20  | 4.26E-19  | Down-regulated |
| NM_020827    | CFAP97        | 57587  | 13.213  | 13.4124 | 9.55191 | 9.66329 | -0.4586 | 4.29E-08  | 4.74E-07  | Down-regulated |
| NM_198549    | MIGA1         | 374986 | 3.4589  | 3.41228 | 2.38764 | 2.52406 | -0.4586 | 0.0022481 | 0.0102811 | Down-regulated |
| NM_025203    | WDCP          | 80304  | 4.52778 | 4.57492 | 3.5099  | 2.93205 | -0.4588 | 0.0136997 | 0.0483131 | Down-regulated |
| NM_006366    | yeast)(CAP2   | 10486  | 10.3654 | 9.30377 | 6.99456 | 7.08076 | -0.4589 | 0.000969  | 0.004969  | Down-regulated |
| NM_005782    | ALYREF        | 10189  | 96.8288 | 97.8923 | 69.4244 | 71.0893 | -0.4589 | 5.30E-10  | 7.23E-09  | Down-regulated |
| NM_002296    | LBR           | 3930   | 12.2292 | 12.5477 | 9.26629 | 8.54223 | -0.4599 | 1.54E-05  | 0.0001169 | Down-regulated |



|              |               |        |         |         |         |         |         |           |           |                |
|--------------|---------------|--------|---------|---------|---------|---------|---------|-----------|-----------|----------------|
| NM_005591    | MRE11         | 4361   | 2.95988 | 3.03579 | 2.04506 | 2.19191 | -0.4604 | 0.0121428 | 0.0436524 | Down-regulated |
| NM_152515    | CKAP2L        | 150468 | 4.8254  | 4.62823 | 3.67971 | 3.03716 | -0.4605 | 0.0068112 | 0.0267041 | Down-regulated |
| NM_030594    | CPEB1         | 64506  | 7.16368 | 7.95402 | 4.91713 | 5.81148 | -0.4608 | 0.0061449 | 0.024435  | Down-regulated |
| NM_001316984 | FAM207A       | 85395  | 47.0377 | 37.9274 | 30.6519 | 29.636  | -0.4609 | 0.0054047 | 0.0219533 | Down-regulated |
| NM_018841    | GNNG12        | 55970  | 57.0571 | 52.9473 | 38.5022 | 40.9152 | -0.4611 | 1.88E-13  | 3.51E-12  | Down-regulated |
| NM_002703    | PPAT          | 5471   | 12.2022 | 12.556  | 8.89755 | 8.89088 | -0.4612 | 6.61E-06  | 5.39E-05  | Down-regulated |
| NM_004889    | ATP5J2        | 9551   | 423.916 | 406.199 | 275.907 | 318.647 | -0.4614 | 2.22E-06  | 1.95E-05  | Down-regulated |
| NM_033119    | NKD1          | 85407  | 2.59286 | 2.56331 | 1.86345 | 1.8169  | -0.4619 | 0.0015539 | 0.0074881 | Down-regulated |
| NM_004596    | SNRPA         | 6626   | 43.6273 | 40.9838 | 29.391  | 31.404  | -0.4623 | 1.47E-06  | 1.33E-05  | Down-regulated |
| NM_005455    | ZRANB2        | 9406   | 20.9525 | 24.1169 | 17.2242 | 15.0665 | -0.463  | 0.0001036 | 0.000666  | Down-regulated |
| NM_001286805 | TBC1D14       | 57533  | 24.8102 | 17.8044 | 16.4805 | 13.7221 | -0.4631 | 0.0056741 | 0.0228529 | Down-regulated |
| NM_005511    | MLANA         | 2315   | 328.453 | 304.481 | 226.105 | 230.211 | -0.4634 | 2.76E-19  | 7.86E-18  | Down-regulated |
| NM_058190    | FAM207A       | 85395  | 35.8459 | 35.145  | 25.2632 | 25.3526 | -0.4635 | 0.0010068 | 0.0051396 | Down-regulated |
| NM_001098426 | SMARCD2       | 6603   | 42.6144 | 47.2481 | 33.1009 | 31.5313 | -0.4635 | 1.42E-08  | 1.66E-07  | Down-regulated |
| NM_016491    | MRPL37        | 51253  | 148.882 | 139.179 | 105.361 | 102.168 | -0.4636 | 3.25E-14  | 6.54E-13  | Down-regulated |
| NM_018249    | CDK5RAP2      | 55755  | 6.88133 | 6.13632 | 4.80272 | 4.5169  | -0.4639 | 0.000142  | 0.0008871 | Down-regulated |
| NM_018843    | SLC25A40      | 55972  | 7.00344 | 7.08384 | 4.75735 | 5.21612 | -0.4644 | 0.0031145 | 0.0135835 | Down-regulated |
| NM_014233    | UBTF          | 7343   | 13.7494 | 11.376  | 9.12997 | 8.83862 | -0.4646 | 0.0001539 | 0.0009533 | Down-regulated |
| NM_014481    | APEX2         | 27301  | 25.4935 | 25.0592 | 18.294  | 17.9493 | -0.4646 | 2.11E-06  | 1.86E-05  | Down-regulated |
| NM_001301726 | TCFL5         | 10732  | 11.8274 | 11.8175 | 8.77397 | 8.12965 | -0.4647 | 0.0002163 | 0.0012918 | Down-regulated |
| NM_020977    | ANK2          | 287    | 4.72786 | 5.21845 | 3.87364 | 3.20348 | -0.4654 | 0.0011372 | 0.0057167 | Down-regulated |
| NM_014241    | HACD1         | 9200   | 68.5885 | 62.1405 | 48.1112 | 45.5736 | -0.4655 | 1.00E-06  | 9.31E-06  | Down-regulated |
| NM_006554    | MTX2          | 10651  | 32.1376 | 26.4095 | 19.389  | 22.1077 | -0.4656 | 0.0032022 | 0.0139151 | Down-regulated |
| NM_001323360 | ST3GAL6       | 10402  | 12.743  | 9.95354 | 8.42388 | 7.67299 | -0.4656 | 0.0033659 | 0.014559  | Down-regulated |
| NM_006272    | S100B         | 6285   | 165.219 | 150.779 | 113.119 | 113.879 | -0.4664 | 5.72E-11  | 8.61E-10  | Down-regulated |
| NM_145261    | member C19C   | 131118 | 28.4714 | 24.4369 | 18.5694 | 19.0872 | -0.4666 | 0.0008749 | 0.0045538 | Down-regulated |
| NM_001134479 | LRRRC8D       | 55144  | 10.9241 | 11.2003 | 8.17158 | 7.64109 | -0.4672 | 2.58E-05  | 0.0001869 | Down-regulated |
| NM_015934    | NOP58         | 51602  | 57.1713 | 58.6117 | 41.8138 | 41.3672 | -0.4676 | 1.11E-12  | 1.93E-11  | Down-regulated |
| NM_001004105 | GRK6          | 2870   | 13.6348 | 16.8424 | 11.7795 | 9.65483 | -0.4676 | 0.0112913 | 0.0410393 | Down-regulated |
| NM_004044    | ATIC          | 471    | 65.6606 | 62.4084 | 46.8992 | 45.0749 | -0.4679 | 3.59E-12  | 5.93E-11  | Down-regulated |
| NM_001013620 | ALG10B        | 144245 | 1.87726 | 1.7915  | 1.41143 | 1.17121 | -0.4682 | 0.0099436 | 0.0368204 | Down-regulated |
| NM_005497    | GJC1          | 10052  | 9.54403 | 10.7559 | 7.75725 | 6.74775 | -0.4682 | 2.78E-05  | 0.0002003 | Down-regulated |
| NM_025077    | nuclear)(TOE  | 114034 | 6.67494 | 7.20165 | 4.758   | 5.00645 | -0.4683 | 0.0116562 | 0.0421169 | Down-regulated |
| NM_020216    | RNPEP         | 6051   | 50.1521 | 46.9881 | 33.1704 | 36.4548 | -0.4685 | 1.10E-08  | 1.29E-07  | Down-regulated |
| NM_001702    | ADGRB1        | 575    | 7.02274 | 7.44999 | 5.16006 | 5.18337 | -0.4685 | 2.68E-05  | 0.0001936 | Down-regulated |
| NM_024319    | C1orf35       | 79169  | 16.7973 | 17.1975 | 11.1073 | 12.8739 | -0.4687 | 0.0053789 | 0.0218762 | Down-regulated |
| NM_007238    | PXMP4         | 11264  | 3.07932 | 3.11842 | 2.00224 | 2.36406 | -0.4687 | 0.0099569 | 0.0368623 | Down-regulated |
| NM_001197051 | ZFP91         | 80829  | 4.7041  | 4.57449 | 3.14319 | 3.45325 | -0.4689 | 0.0008756 | 0.0045562 | Down-regulated |
| NM_017515    | SLC35F2       | 54733  | 23.8054 | 22.803  | 16.3093 | 17.0788 | -0.4691 | 2.36E-08  | 2.68E-07  | Down-regulated |
| NM_023928    | AACS          | 65985  | 16.8408 | 18.4456 | 13.04   | 12.1659 | -0.4692 | 6.21E-06  | 5.10E-05  | Down-regulated |
| NM_207118    | GTF2H5        | 404672 | 4.53714 | 3.63616 | 2.60548 | 3.14723 | -0.4694 | 0.0076669 | 0.0296062 | Down-regulated |
| NM_001303457 | TTI1          | 9675   | 11.5837 | 10.9038 | 8.19405 | 7.86305 | -0.4699 | 1.95E-05  | 0.0001445 | Down-regulated |
| NM_020745    | AARS2         | 57505  | 18.6207 | 18.6117 | 13.1343 | 13.5569 | -0.4699 | 7.14E-11  | 1.07E-09  | Down-regulated |
| NM_006325    | RAN           | 5901   | 256.703 | 240.783 | 174.76  | 182.395 | -0.4703 | 1.99E-22  | 6.60E-21  | Down-regulated |
| NM_001326580 | STX7          | 8417   | 36.3895 | 33.5151 | 26.8775 | 22.6592 | -0.4706 | 0.0006838 | 0.0036435 | Down-regulated |
| NM_001161561 | TNIK          | 23043  | 1.55943 | 1.47025 | 1.02718 | 1.09834 | -0.4707 | 0.0115116 | 0.041705  | Down-regulated |
| NM_024516    | PAGR1         | 79447  | 27.3574 | 25.348  | 19.4371 | 18.2902 | -0.4708 | 4.88E-09  | 6.02E-08  | Down-regulated |
| NM_006726    | LRBA          | 987    | 4.27071 | 3.12542 | 2.70647 | 2.49369 | -0.4713 | 0.007893  | 0.0303202 | Down-regulated |
| NM_001278698 | POLR2H        | 5437   | 13.7161 | 12.8211 | 8.92793 | 9.64263 | -0.4718 | 0.0138511 | 0.0487302 | Down-regulated |
| NM_002996    | CX3CL1        | 6376   | 8.18238 | 7.65817 | 5.48724 | 5.72644 | -0.4722 | 0.0009279 | 0.0047864 | Down-regulated |
| NM_001145374 | ALKBH2        | 121642 | 19.7278 | 22.2398 | 12.9898 | 16.2956 | -0.4727 | 0.0138739 | 0.0487958 | Down-regulated |
| NM_031966    | CCNB1         | 891    | 58.9926 | 53.4896 | 40.8467 | 39.5442 | -0.4729 | 2.50E-09  | 3.16E-08  | Down-regulated |
| NM_003472    | DEK           | 7913   | 41.5714 | 40.3296 | 28.0422 | 30.5194 | -0.4732 | 2.18E-10  | 3.12E-09  | Down-regulated |
| NM_006058    | TNIP1         | 10318  | 18.1426 | 17.9611 | 13.1866 | 12.5556 | -0.4735 | 1.30E-06  | 1.19E-05  | Down-regulated |
| NM_003143    | SSBP1         | 6742   | 227.856 | 213.562 | 162.469 | 152.416 | -0.4737 | 1.62E-09  | 2.10E-08  | Down-regulated |
| NM_001005463 | EBF3          | 253738 | 11.2226 | 11.0442 | 7.39352 | 8.44152 | -0.4739 | 2.84E-05  | 0.0002044 | Down-regulated |
| NM_005646    | binding prote | 6894   | 6.3849  | 6.25714 | 4.33668 | 4.63468 | -0.4748 | 0.0001378 | 0.0008635 | Down-regulated |
| NM_001330537 | SDCBP         | 6386   | 8.50478 | 7.9495  | 6.00396 | 5.64303 | -0.475  | 0.0002447 | 0.0014444 | Down-regulated |
| NM_006452    | PAICS         | 10606  | 25.1758 | 19.2476 | 18.0933 | 12.9807 | -0.4755 | 0.0098578 | 0.0365592 | Down-regulated |
| NM_001282279 | PYCR1         | 5831   | 10.1543 | 11.191  | 7.49325 | 7.45129 | -0.4756 | 0.0071357 | 0.0278077 | Down-regulated |
| NM_006848    | CCDC85B       | 11007  | 47.343  | 45.5465 | 33.8307 | 32.163  | -0.4758 | 4.23E-06  | 3.57E-05  | Down-regulated |
| NM_004741    | NOLC1         | 9221   | 10.1281 | 11.1535 | 6.89365 | 8.16515 | -0.4758 | 0.0005048 | 0.0027722 | Down-regulated |
| NM_001278206 | SLC43A3       | 29015  | 7.49847 | 9.0839  | 6.25999 | 5.30616 | -0.476  | 0.01153   | 0.0417321 | Down-regulated |
| NM_001253380 | RPL15         | 6138   | 25.5307 | 24.0073 | 18.8676 | 16.2586 | -0.4761 | 8.14E-05  | 0.0005338 | Down-regulated |
| NM_018079    | SRBD1         | 55133  | 5.56908 | 5.77505 | 3.7498  | 4.21731 | -0.4761 | 0.0037548 | 0.0160318 | Down-regulated |
| NM_001204890 | ISY1-RAB43    | 1E+08  | 6.09767 | 7.52502 | 4.59017 | 5.00279 | -0.4765 | 0.0023556 | 0.0106985 | Down-regulated |
| NM_004765    | BCL7C         | 9274   | 56.8783 | 57.3824 | 40.0063 | 41.2127 | -0.4765 | 1.44E-06  | 1.30E-05  | Down-regulated |
| NM_021135    | RPS6KA2       | 6196   | 31.5679 | 31.4759 | 22.4226 | 22.6426 | -0.4766 | 1.55E-21  | 4.96E-20  | Down-regulated |
| NM_181719    | TMCO4         | 255104 | 10.7039 | 9.91278 | 7.19685 | 7.39601 | -0.4766 | 0.0003468 | 0.0019835 | Down-regulated |
| NM_012412    | H2AFV         | 94239  | 42.3179 | 43.3616 | 28.9227 | 31.9874 | -0.4767 | 5.18E-06  | 4.31E-05  | Down-regulated |
| NM_015640    | SERBP1        | 26135  | 12.2156 | 12.2443 | 8.33725 | 9.08482 | -0.4776 | 5.93E-09  | 7.25E-08  | Down-regulated |
| NM_002300    | LDHB          | 3945   | 1832.99 | 1771.69 | 1258.35 | 1316.07 | -0.4778 | 2.77E-35  | 1.57E-33  | Down-regulated |
| NR_015384    | OC10012678    | 1E+08  | 7.65333 | 7.71478 | 5.68472 | 5.16495 | -0.478  | 0.0005159 | 0.002827  | Down-regulated |
| NM_001243137 | PDE8A         | 5151   | 8.65581 | 7.03035 | 5.9026  | 5.10228 | -0.4781 | 0.0053469 | 0.0217554 | Down-regulated |
| NM_001142573 | IMPDH1        | 3614   | 86.2614 | 89.9959 | 67.2486 | 58.2173 | -0.4782 | 7.80E-09  | 9.36E-08  | Down-regulated |
| NM_203406    | MBLAC2        | 153364 | 4.12018 | 4.08105 | 2.65169 | 3.07319 | -0.4786 | 0.0083858 | 0.0319433 | Down-regulated |
| NM_017828    | COMMD4        | 54939  | 111.049 | 108.923 | 76.8109 | 79.6458 | -0.4787 | 6.92E-10  | 9.33E-09  | Down-regulated |
| NR_103821    | EMC3-AS1      | 442075 | 4.42695 | 4.67718 | 3.04162 | 3.35498 | -0.4792 | 0.0028473 | 0.0126019 | Down-regulated |
| NM_033416    | IMP4          | 92856  | 25.9884 | 24.881  | 17.8332 | 18.3654 | -0.4795 | 2.76E-09  | 3.47E-08  | Down-regulated |
| NM_006331    | EMG1          | 10436  | 48.6732 | 45.3624 | 32.3455 | 34.1687 | -0.4796 | 4.22E-05  | 0.0002926 | Down-regulated |
| NM_003096    | SNRPG         | 6637   | 263.596 | 253.37  | 178.177 | 188.528 | -0.4803 | 5.05E-10  | 6.93E-09  | Down-regulated |
| NM_014875    | KIF14         | 9928   | 2.61531 | 2.94185 | 1.89592 | 1.99577 | -0.4803 | 0.0038988 | 0.0165616 | Down-regulated |
| NM_022497    | MRPS25        | 64432  | 15.9793 | 13.8282 | 10.6248 | 10.5074 | -0.4804 | 5.33E-06  | 4.42E-05  | Down-regulated |
| NM_003966    | SEMA5A        | 9037   | 13.0287 | 13.782  | 9.43811 | 9.64668 | -0.4817 | 2.06E-15  | 4.54E-14  | Down-regulated |

|                            |                             |        |         |         |         |         |         |           |           |                |
|----------------------------|-----------------------------|--------|---------|---------|---------|---------|---------|-----------|-----------|----------------|
| NM_000408                  | GPD2                        | 2820   | 12.2242 | 12.5517 | 9.48149 | 8.06483 | -0.4817 | 6.90E-06  | 5.61E-05  | Down-regulated |
| NM_001151                  | SLC25A4                     | 291    | 24.6827 | 23.1035 | 17.4177 | 16.5458 | -0.4818 | 1.96E-10  | 2.82E-09  | Down-regulated |
| NM_004257                  | TGFBRAP1                    | 9392   | 4.85803 | 5.09925 | 3.59015 | 3.42905 | -0.4821 | 0.0003146 | 0.0018159 | Down-regulated |
| NM_005788                  | PRMT3                       | 10196  | 11.7971 | 12.8017 | 8.82235 | 8.52348 | -0.4823 | 0.0001946 | 0.0011753 | Down-regulated |
| NM_0030792                 | GDPD5                       | 81544  | 9.10962 | 10.069  | 6.47878 | 7.01095 | -0.4824 | 0.0006303 | 0.0033898 | Down-regulated |
| NM_006713                  | SUB1                        | 10923  | 35.523  | 33.5005 | 23.9489 | 25.0956 | -0.4825 | 7.60E-12  | 1.23E-10  | Down-regulated |
| NM_004563                  | PCK2                        | 5106   | 26.0059 | 26.5088 | 19.816  | 17.3354 | -0.483  | 6.51E-06  | 5.32E-05  | Down-regulated |
| NM_006918                  | SC5D                        | 6309   | 10.6883 | 10.8422 | 7.15365 | 8.10182 | -0.483  | 3.34E-07  | 3.30E-06  | Down-regulated |
| NM_004824                  | CDYL                        | 9425   | 8.83447 | 9.79982 | 6.43666 | 6.69108 | -0.4834 | 0.0003233 | 0.0018598 | Down-regulated |
| NM_001142556               | HMMR                        | 3161   | 7.33399 | 7.83647 | 4.83863 | 5.76042 | -0.4836 | 0.0038304 | 0.016311  | Down-regulated |
| NM_001031684               | SRSF7                       | 6432   | 63.5701 | 62.1196 | 42.9642 | 46.3106 | -0.4838 | 1.66E-13  | 3.12E-12  | Down-regulated |
| NM_001532                  | SLC29A2                     | 3177   | 13.0605 | 11.4191 | 8.8995  | 8.27251 | -0.4839 | 0.0009844 | 0.0050399 | Down-regulated |
| NM_001111018               | NAV2                        | 89797  | 12.2616 | 14.0177 | 9.17855 | 9.45566 | -0.484  | 1.39E-08  | 1.62E-07  | Down-regulated |
| NM_014325                  | CORO1C                      | 23603  | 149.233 | 145.549 | 104.632 | 105.143 | -0.4841 | 2.12E-45  | 1.65E-43  | Down-regulated |
| NM_152740                  | HIBADH                      | 11112  | 25.8298 | 26.1498 | 18.169  | 18.6293 | -0.4844 | 1.23E-06  | 1.13E-05  | Down-regulated |
| NM_004508                  | ID1I                        | 3422   | 25.3831 | 24.2784 | 15.9739 | 19.0601 | -0.4852 | 1.68E-05  | 0.0001263 | Down-regulated |
| NM_144999                  | LRRC45                      | 201255 | 10.1734 | 10.6847 | 7.48663 | 7.16781 | -0.4852 | 0.0004413 | 0.0024641 | Down-regulated |
| NM_006449                  | CDC42EP3                    | 10602  | 11.2029 | 11.403  | 7.99779 | 8.02046 | -0.4853 | 7.48E-09  | 9.02E-08  | Down-regulated |
| NM_024675                  | PALB2                       | 79728  | 5.39771 | 5.2832  | 3.73871 | 3.74079 | -0.4855 | 0.0014648 | 0.0071197 | Down-regulated |
| NM_001035267               | RPL41                       | 6171   | 301.502 | 289.326 | 195.133 | 221.477 | -0.4856 | 1.91E-07  | 1.96E-06  | Down-regulated |
| NM_080656                  | DKN2AIPN1                   | 91368  | 35.5222 | 40.0831 | 24.7206 | 28.3429 | -0.4857 | 0.0004214 | 0.0023645 | Down-regulated |
| NM_001244701               | ZFP36L1<br>(protein coding) | 677    | 61.8144 | 62.2197 | 44.1265 | 43.9508 | -0.4858 | 1.03E-22  | 3.51E-21  | Down-regulated |
| NR_003367                  | USP4                        | 5820   | 11.6607 | 10.4664 | 7.41833 | 7.99215 | -0.486  | 0.0045245 | 0.0187892 | Down-regulated |
| NM_199443                  | USP4                        | 7375   | 6.05973 | 6.28766 | 4.10004 | 4.55061 | -0.4861 | 0.0012024 | 0.0059987 | Down-regulated |
| NM_014503                  | UTP20                       | 27340  | 7.53706 | 7.56733 | 5.50084 | 5.18885 | -0.4867 | 8.42E-09  | 1.01E-07  | Down-regulated |
| NR_026911                  | RPL21P28                    | 1E+08  | 930.723 | 868.164 | 569.286 | 696.608 | -0.4868 | 1.77E-06  | 1.57E-05  | Down-regulated |
| NM_018128                  | TSR1                        | 55720  | 45.663  | 46.5744 | 32.4606 | 32.998  | -0.487  | 1.69E-24  | 6.41E-23  | Down-regulated |
| NM_018401                  | STK32B                      | 55351  | 19.3726 | 19.29   | 13.9784 | 13.3572 | -0.4878 | 1.01E-08  | 1.20E-07  | Down-regulated |
| NM_016050                  | MRPL11                      | 65003  | 22.5042 | 23.191  | 15.6206 | 16.4577 | -0.4882 | 9.92E-05  | 0.0006397 | Down-regulated |
| NM_003348                  | UBE2N                       | 7334   | 57.6596 | 55.9975 | 40.1512 | 40.3486 | -0.4885 | 1.50E-16  | 3.51E-15  | Down-regulated |
| NM_016551                  | TM7SF3                      | 51768  | 74.1659 | 73.1747 | 52.9333 | 51.4847 | -0.4895 | 2.94E-31  | 1.48E-29  | Down-regulated |
| NM_012117                  | CBX5                        | 23468  | 7.64601 | 7.95428 | 5.55972 | 5.47393 | -0.4898 | 1.43E-11  | 2.26E-10  | Down-regulated |
| NM_032704                  | TUBA1C                      | 84790  | 315.777 | 296.976 | 215.936 | 217.955 | -0.4898 | 2.95E-26  | 1.24E-24  | Down-regulated |
| NM_004879                  | EI24                        | 9538   | 49.0382 | 47.0914 | 32.754  | 35.1668 | -0.4899 | 9.66E-11  | 1.43E-09  | Down-regulated |
| NM_016020                  | TFB1M                       | 51106  | 13.2027 | 13.3181 | 9.13103 | 9.50699 | -0.4901 | 2.97E-05  | 0.0002129 | Down-regulated |
| NM_006351                  | TIMM44                      | 10469  | 46.4463 | 45.2152 | 31.6914 | 33.0224 | -0.4902 | 1.55E-10  | 2.25E-09  | Down-regulated |
| NM_016396                  | CTDPSL2                     | 51496  | 3.14156 | 3.48736 | 2.30821 | 2.28658 | -0.4902 | 0.0078016 | 0.0300113 | Down-regulated |
| NM_000273                  | GPR143                      | 4935   | 70.3621 | 71.4298 | 50.2634 | 49.9643 | -0.4903 | 7.93E-14  | 1.53E-12  | Down-regulated |
| NM_001256310               | GLS                         | 2744   | 29.0215 | 31.8642 | 21.3139 | 21.7142 | -0.4904 | 3.06E-11  | 4.71E-10  | Down-regulated |
| NM_013327                  | PARVB                       | 29780  | 65.9929 | 59.7211 | 46.5295 | 41.9965 | -0.4907 | 1.90E-07  | 1.95E-06  | Down-regulated |
| NM_000140                  | FECH                        | 2235   | 6.35891 | 6.04129 | 4.46641 | 4.2514  | -0.491  | 3.27E-06  | 2.81E-05  | Down-regulated |
| NM_004078                  | CSRP1                       | 1465   | 112.242 | 108.882 | 78.1009 | 78.2134 | -0.4919 | 4.13E-22  | 1.35E-20  | Down-regulated |
| NM_024844                  | NUP85                       | 79902  | 21.9392 | 22.2148 | 16.0125 | 15.0392 | -0.492  | 1.32E-06  | 1.20E-05  | Down-regulated |
| NM_033254                  | BOC                         | 91653  | 5.80637 | 6.00017 | 3.83281 | 4.40874 | -0.4923 | 0.0008062 | 0.0042214 | Down-regulated |
| NM_002161                  | IARS                        | 3376   | 25.0087 | 25.4198 | 18.6199 | 16.9338 | -0.4924 | 1.05E-10  | 1.54E-09  | Down-regulated |
| NM_003487                  | TAF15                       | 8148   | 14.9114 | 15.9087 | 10.7469 | 10.8105 | -0.4927 | 0.0001274 | 0.000803  | Down-regulated |
| NM_018947                  | CYCS                        | 54205  | 48.7225 | 46.6677 | 33.4984 | 33.9274 | -0.493  | 3.48E-25  | 1.37E-23  | Down-regulated |
| NM_078469                  | BCCIP                       | 56647  | 9.58086 | 10.5854 | 7.1203  | 6.87183 | -0.4936 | 0.0018103 | 0.0085343 | Down-regulated |
| NM_020244                  | CHPT1                       | 56994  | 48.2273 | 45.0312 | 34.6401 | 30.7946 | -0.4938 | 2.21E-06  | 1.95E-05  | Down-regulated |
| NM_020158                  | EXOSC5                      | 56915  | 55.1228 | 53.8133 | 39.9165 | 36.2848 | -0.4948 | 1.78E-05  | 0.0001333 | Down-regulated |
| NM_005813                  | PRKD3                       | 23683  | 18.3603 | 18.2864 | 12.717  | 13.1135 | -0.4949 | 4.30E-14  | 8.53E-13  | Down-regulated |
| NM_016561                  | BFAR                        | 51283  | 34.48   | 35.0199 | 24.1711 | 24.791  | -0.495  | 3.03E-13  | 5.57E-12  | Down-regulated |
| NM_0022770                 | GINS3                       | 64785  | 7.77723 | 7.39301 | 5.03565 | 5.427   | -0.4962 | 0.0066794 | 0.0262489 | Down-regulated |
| NM_014177                  | TIMM21                      | 29090  | 35.5386 | 33.4221 | 24.798  | 23.5386 | -0.4966 | 3.85E-06  | 3.26E-05  | Down-regulated |
| NM_148170                  | CTSC                        | 1075   | 3.61529 | 3.47135 | 2.4516  | 2.46923 | -0.4966 | 0.0010155 | 0.0051798 | Down-regulated |
| NM_001316311               | RPL35A                      | 6165   | 346.149 | 332.544 | 236.903 | 238.689 | -0.4973 | 1.16E-10  | 1.70E-09  | Down-regulated |
| NM_001005335               | HNRNPL                      | 3191   | 82.6589 | 79.8107 | 57.3751 | 56.9432 | -0.4975 | 9.73E-17  | 2.30E-15  | Down-regulated |
| NM_001297714               | SWAP70                      | 23075  | 6.60173 | 5.6212  | 3.93377 | 4.53032 | -0.4982 | 0.0019575 | 0.0091289 | Down-regulated |
| NM_000460                  | CCNG1                       | 900    | 32.4319 | 30.9467 | 21.1131 | 23.2949 | -0.4983 | 6.46E-08  | 6.96E-07  | Down-regulated |
| NM_000194                  | HPRT1                       | 3251   | 34.1777 | 29.5015 | 21.5966 | 22.7209 | -0.4983 | 0.0001755 | 0.0010698 | Down-regulated |
| NM_000135                  | FANCA                       | 2175   | 4.34896 | 4.33168 | 3.20734 | 2.80514 | -0.4988 | 0.0012709 | 0.0063089 | Down-regulated |
| NM_018214                  | LRRC1                       | 55227  | 6.82842 | 6.01168 | 4.71472 | 4.11447 | -0.4989 | 0.0054906 | 0.0222311 | Down-regulated |
| NM_024057                  | NUP37                       | 79023  | 19.7586 | 15.8259 | 12.0809 | 12.2942 | -0.4994 | 0.0089407 | 0.0336543 | Down-regulated |
| NM_000152                  | GAA                         | 2548   | 12.1413 | 10.0081 | 7.76889 | 7.63864 | -0.4995 | 0.0003174 | 0.0018299 | Down-regulated |
| NM_181491                  | MED22                       | 6837   | 5.89631 | 6.56597 | 4.64515 | 3.96056 | -0.4997 | 0.0027479 | 0.0122216 | Down-regulated |
| NM_001360                  | DHCR7                       | 1717   | 105.881 | 109.62  | 76.5945 | 74.919  | -0.5003 | 2.44E-26  | 1.03E-24  | Down-regulated |
| NM_032593                  | HINT2                       | 84681  | 38.018  | 38.1581 | 25.4632 | 26.6641 | -0.5005 | 0.0077747 | 0.0299406 | Down-regulated |
| NM_006938                  | SNRPD1                      | 6632   | 58.8988 | 55.1298 | 40.8755 | 39.0562 | -0.5005 | 1.75E-09  | 2.25E-08  | Down-regulated |
| NM_018269                  | ADII                        | 55256  | 111.121 | 107.343 | 77.7798 | 75.6181 | -0.5006 | 2.14E-18  | 5.64E-17  | Down-regulated |
| NM_001098209               | CTNBN1                      | 1499   | 139.134 | 125.032 | 86.6537 | 98.539  | -0.5007 | 3.76E-10  | 5.24E-09  | Down-regulated |
| NM_138809                  | CMBL                        | 134147 | 7.96854 | 7.0825  | 5.2342  | 5.20222 | -0.5013 | 0.0002907 | 0.0016895 | Down-regulated |
| NM_015963                  | THAP4                       | 51078  | 23.5842 | 21.577  | 16.8126 | 14.605  | -0.5013 | 5.72E-05  | 0.0003867 | Down-regulated |
| NM_000483                  | APOC2                       | 344    | 111.82  | 98.5659 | 73.7282 | 72.7685 | -0.5016 | 1.16E-05  | 9.02E-05  | Down-regulated |
| NM_152653                  | UBE2E2                      | 7325   | 15.858  | 14.5488 | 10.6709 | 10.3917 | -0.5018 | 0.0008358 | 0.0043659 | Down-regulated |
| NM_016167                  | NOL7                        | 51406  | 13.8615 | 13.4152 | 8.37273 | 10.3477 | -0.5023 | 0.0057484 | 0.0230745 | Down-regulated |
| NM_001040025               | ARL16                       | 339231 | 14.8349 | 18.2185 | 10.8031 | 11.7186 | -0.5023 | 0.0123834 | 0.0444004 | Down-regulated |
| NM_001419                  | ELAVL1                      | 1994   | 13.3277 | 13.3848 | 9.40203 | 9.31486 | -0.5025 | 1.56E-11  | 2.45E-10  | Down-regulated |
| NM_001098722               | GNG4                        | 2786   | 6.24227 | 5.87596 | 4.03589 | 4.38569 | -0.5028 | 0.0001525 | 0.0009456 | Down-regulated |
| NM_016199                  | LSM7                        | 51690  | 425.939 | 405.404 | 287.401 | 292.808 | -0.5032 | 3.26E-12  | 5.42E-11  | Down-regulated |
| NM_001167924(ceast)(CMSS1) | RPA3                        | 84319  | 44.0742 | 42.7551 | 28.0948 | 32.1929 | -0.5033 | 9.73E-05  | 0.0006281 | Down-regulated |
| NM_002947                  | RPA3                        | 6119   | 15.2253 | 12.8115 | 9.31071 | 10.0006 | -0.5037 | 0.0020846 | 0.009649  | Down-regulated |
| NM_001012991               | KNOP1                       | 400506 | 17.8734 | 18.7142 | 12.5664 | 12.8619 | -0.5037 | 5.25E-05  | 0.0003591 | Down-regulated |
| NM_001099678               | LRRC58                      | 116064 | 11.057  | 11.5178 | 7.53041 | 8.26128 | -0.5037 | 2.47E-09  | 3.14E-08  | Down-regulated |
| NM_002136                  | HNRNPA1                     | 3178   | 488.863 | 469.268 | 334.434 | 337.812 | -0.5039 | 4.58E-44  | 3.44E-42  | Down-regulated |

|              |               |        |         |         |         |         |         |           |           |                |
|--------------|---------------|--------|---------|---------|---------|---------|---------|-----------|-----------|----------------|
| NM_004577    | PSPH          | 5723   | 9.90394 | 9.20354 | 6.00499 | 7.10104 | -0.5043 | 0.0058626 | 0.0234686 | Down-regulated |
| NM_002340    | ene-lanosterc | 4047   | 37.0133 | 41.6071 | 28.3827 | 26.5804 | -0.5043 | 7.45E-10  | 1.00E-08  | Down-regulated |
| NM_007210    | GALNT6        | 11226  | 3.13479 | 2.92238 | 2.01191 | 2.10611 | -0.5048 | 0.011093  | 0.0404494 | Down-regulated |
| NM_003887    | ASAP2         | 8853   | 4.81874 | 6.63045 | 4.12815 | 3.68295 | -0.5052 | 0.0076277 | 0.0294855 | Down-regulated |
| NM_001082578 | RBFOX2        | 23543  | 4.75246 | 6.36896 | 3.72326 | 3.92063 | -0.5055 | 0.0031075 | 0.013559  | Down-regulated |
| NM_002737    | PRKCA         | 5578   | 5.4783  | 5.88441 | 3.94055 | 3.97545 | -0.5061 | 6.39E-07  | 6.08E-06  | Down-regulated |
| NM_001242824 | FDP5          | 2224   | 71.6208 | 92.3639 | 54.274  | 59.1928 | -0.5063 | 0.000175  | 0.0010673 | Down-regulated |
| NM_001320219 | U2SURP        | 23350  | 9.49171 | 9.03117 | 6.4488  | 6.4751  | -0.5071 | 1.21E-09  | 1.58E-08  | Down-regulated |
| NM_032818    | ARHGEF39      | 84904  | 6.11493 | 5.26012 | 3.94023 | 3.84698 | -0.5074 | 0.0027646 | 0.0122874 | Down-regulated |
| NM_001329976 | LONRF1        | 91694  | 13.7097 | 14.2009 | 7.53374 | 11.4541 | -0.5074 | 0.0086444 | 0.0327196 | Down-regulated |
| NM_001014433 | CUTA          | 51596  | 73.299  | 49.4173 | 39.989  | 43.1121 | -0.5079 | 0.0129229 | 0.0459724 | Down-regulated |
| NM_005336    | HDLBP         | 3069   | 11.4752 | 11.4597 | 7.70983 | 8.28213 | -0.5083 | 9.56E-10  | 1.27E-08  | Down-regulated |
| NM_007208    | MRPL3         | 11222  | 85.214  | 85.1712 | 59.7587 | 59.2002 | -0.5086 | 3.79E-18  | 9.90E-17  | Down-regulated |
| NM_004454    | ETV5          | 2119   | 61.8377 | 63.2398 | 44.4072 | 43.0385 | -0.5088 | 1.00E-26  | 4.30E-25  | Down-regulated |
| NM_002014    | FKBP4         | 2288   | 42.3123 | 40.3928 | 28.4571 | 29.2865 | -0.509  | 3.49E-17  | 8.51E-16  | Down-regulated |
| NM_007192    | SUPT16H       | 11198  | 28.0756 | 27.1051 | 19.1329 | 19.3811 | -0.5095 | 1.49E-16  | 3.49E-15  | Down-regulated |
| NM_001330247 | HNRNPA3       | 220988 | 7.76885 | 7.13517 | 5.07393 | 5.25857 | -0.5106 | 5.71E-06  | 4.72E-05  | Down-regulated |
| NM_003412    | ZIC1          | 7545   | 6.41234 | 5.33547 | 4.15496 | 3.92478 | -0.5107 | 0.0008389 | 0.0043808 | Down-regulated |
| NM_021158    | TRIB3         | 57761  | 32.4195 | 31.921  | 22.3284 | 22.4673 | -0.5108 | 6.22E-11  | 9.34E-10  | Down-regulated |
| NM_182984    | TRMT2A        | 27037  | 8.21542 | 10.6656 | 6.68406 | 6.15457 | -0.5111 | 0.0057561 | 0.0230958 | Down-regulated |
| NM_001160305 | SETD6         | 79918  | 7.21307 | 6.03761 | 4.09118 | 4.90745 | -0.5118 | 0.0092271 | 0.0345735 | Down-regulated |
| NM_003609    | HIRIP3        | 8479   | 20.3311 | 20.8591 | 14.4314 | 14.1875 | -0.5119 | 7.58E-09  | 9.12E-08  | Down-regulated |
| NM_032646    | TTYH2         | 94015  | 37.7943 | 38.9009 | 26.8948 | 26.5314 | -0.5121 | 9.12E-17  | 2.17E-15  | Down-regulated |
| NM_016195    | KIF20B        | 9585   | 4.76263 | 4.87115 | 3.34545 | 3.31468 | -0.5121 | 4.69E-05  | 0.0003224 | Down-regulated |
| NM_020773    | TBC1D14       | 57533  | 33.034  | 37.7979 | 23.9617 | 25.2778 | -0.5124 | 1.19E-09  | 1.56E-08  | Down-regulated |
| NM_022451    | NOC3L         | 64318  | 8.78648 | 8.51123 | 5.9973  | 5.9392  | -0.5126 | 7.51E-05  | 0.0004959 | Down-regulated |
| NM_203456    | PPIE          | 10450  | 21.1173 | 21.7624 | 14.4763 | 14.8455 | -0.5133 | 0.0018303 | 0.0086075 | Down-regulated |
| NM_145080    | NSMCE1        | 197370 | 33.166  | 30.1256 | 19.8513 | 23.3908 | -0.5144 | 0.0014137 | 0.0069191 | Down-regulated |
| NM_138461    | TM4SF19       | 116211 | 39.2798 | 31.5523 | 25.2289 | 23.1426 | -0.5148 | 0.0021272 | 0.0098035 | Down-regulated |
| NM_018695    | ERBIN         | 55914  | 6.7279  | 6.87474 | 5.07552 | 4.29733 | -0.5149 | 3.05E-05  | 0.0002177 | Down-regulated |
| NM_030821    | PLA2G12A      | 81579  | 4.58694 | 5.16048 | 3.34919 | 3.33867 | -0.5149 | 0.0005804 | 0.0031449 | Down-regulated |
| NM_005238    | ETS1          | 2113   | 15.8301 | 18.346  | 11.7886 | 11.8794 | -0.5149 | 2.25E-07  | 2.27E-06  | Down-regulated |
| NM_001166269 | HAUS4         | 54930  | 8.81208 | 8.15353 | 5.59598 | 5.79096 | -0.5158 | 0.014168  | 0.0497352 | Down-regulated |
| NM_013300    | FAM216A       | 29902  | 22.5795 | 20.676  | 14.6997 | 14.9939 | -0.5158 | 0.0001911 | 0.0011558 | Down-regulated |
| NM_001071775 | MZT1          | 440145 | 12.5178 | 12.1859 | 8.36999 | 8.61102 | -0.5166 | 0.0001112 | 0.0007098 | Down-regulated |
| NM_017615    | NSMCE4A       | 54780  | 15.5229 | 13.9134 | 9.31617 | 10.6067 | -0.517  | 0.0054764 | 0.0221877 | Down-regulated |
| NM_001256964 | CCDC51        | 79714  | 21.5617 | 24.1675 | 15.598  | 15.8182 | -0.5173 | 0.0001161 | 0.0007378 | Down-regulated |
| NM_013233    | STK39         | 27347  | 5.68883 | 5.00724 | 3.42953 | 3.79192 | -0.5175 | 0.0060107 | 0.0239865 | Down-regulated |
| NM_006322    | TUBGCP3       | 10426  | 9.86091 | 9.21909 | 6.42055 | 6.72502 | -0.5177 | 1.57E-05  | 0.0001186 | Down-regulated |
| NM_016048    | ISOC1         | 51015  | 9.15423 | 9.47393 | 6.26901 | 6.37469 | -0.5178 | 0.0036513 | 0.0156565 | Down-regulated |
| NM_001100626 | ERLIN1        | 10613  | 11.9781 | 12.7759 | 8.44036 | 8.60844 | -0.5183 | 8.67E-06  | 6.90E-05  | Down-regulated |
| NM_207332    | ERICH1        | 157697 | 21.624  | 20.5262 | 14.5298 | 14.4334 | -0.5184 | 1.93E-05  | 0.0001429 | Down-regulated |
| NM_148893    | SVIP          | 258010 | 5.60227 | 6.13481 | 4.33385 | 3.61574 | -0.5187 | 0.0060652 | 0.0241686 | Down-regulated |
| NM_133367    | PAQR8         | 85315  | 8.64696 | 9.0742  | 6.05031 | 6.16208 | -0.5197 | 1.95E-06  | 1.74E-05  | Down-regulated |
| NM_005854    | RAMP2         | 10266  | 36.8325 | 38.5609 | 25.6582 | 25.6025 | -0.5205 | 0.001193  | 0.0059596 | Down-regulated |
| NM_004422    | DVL2          | 1856   | 47.1953 | 46.7065 | 31.9083 | 33.1063 | -0.5208 | 5.50E-18  | 1.42E-16  | Down-regulated |
| NM_001320122 | PMEL          | 6490   | 491.879 | 408.363 | 312.553 | 309.248 | -0.5209 | 3.83E-10  | 5.32E-09  | Down-regulated |
| NM_032294    | CAMKK1        | 84254  | 5.43883 | 5.59455 | 3.71261 | 3.8014  | -0.5212 | 0.0014554 | 0.0070906 | Down-regulated |
| NM_001200054 | PMEL          | 6490   | 180.84  | 200.761 | 135.766 | 128.22  | -0.5212 | 5.61E-15  | 1.19E-13  | Down-regulated |
| NM_001070    | TUBG1         | 7283   | 59.5422 | 53.2407 | 37.5728 | 40.2323 | -0.5213 | 7.83E-09  | 9.39E-08  | Down-regulated |
| NM_015315    | LARP1         | 23367  | 40.0631 | 41.5779 | 28.9057 | 27.6695 | -0.5213 | 1.18E-24  | 4.50E-23  | Down-regulated |
| NM_001145432 | SMIM20        | 389203 | 32.7129 | 34.5169 | 22.5118 | 23.3479 | -0.5217 | 0.0002257 | 0.0013411 | Down-regulated |
| NM_020165    | RAD18         | 56852  | 7.0593  | 6.74244 | 4.55926 | 4.92508 | -0.5218 | 6.97E-06  | 5.66E-05  | Down-regulated |
| NM_005962    | MXI1          | 4601   | 14.222  | 12.8794 | 9.18813 | 9.4297  | -0.5221 | 6.05E-06  | 4.98E-05  | Down-regulated |
| NM_015038    | KIAA0754      | 643314 | 2.99673 | 3.13977 | 2.12368 | 2.06116 | -0.5236 | 0.0006741 | 0.0035979 | Down-regulated |
| NR_037716    | RNASEK        | 440400 | 28.5221 | 24.8597 | 17.4587 | 18.3262 | -0.5236 | 0.0085006 | 0.0323032 | Down-regulated |
| NM_033286    | KNSTRN        | 90417  | 12.3265 | 13.7222 | 8.85181 | 8.80226 | -0.5239 | 0.001581  | 0.0076015 | Down-regulated |
| NR_047516    | ARRB2         | 409    | 19.8289 | 19.9478 | 13.316  | 13.9572 | -0.5239 | 1.60E-05  | 0.000121  | Down-regulated |
| NM_031216    | SEH1L         | 81929  | 11.835  | 11.6414 | 7.69365 | 8.41525 | -0.524  | 6.12E-06  | 5.03E-05  | Down-regulated |
| NM_024562    | TANGO6        | 79613  | 4.61156 | 4.73655 | 3.14952 | 3.21763 | -0.5241 | 0.0004809 | 0.0026619 | Down-regulated |
| NM_001086521 | NDUFAF8       | 284184 | 111.133 | 95.0659 | 69.8571 | 70.2778 | -0.5245 | 0.0004139 | 0.0023267 | Down-regulated |
| NM_173551    | ANKS6         | 203286 | 2.77989 | 2.81882 | 1.99583 | 1.79642 | -0.5248 | 0.0013445 | 0.0066295 | Down-regulated |
| NM_080611    | DUSP15        | 128853 | 16.5073 | 12.7281 | 9.93035 | 9.67098 | -0.5249 | 0.0099624 | 0.0368755 | Down-regulated |
| NM_001645    | APOC1         | 341    | 421.385 | 379.121 | 277.201 | 272.808 | -0.5255 | 7.04E-11  | 1.05E-09  | Down-regulated |
| NM_016085    | ATRAID        | 51374  | 16.8283 | 17.2507 | 12.2414 | 10.6326 | -0.5257 | 0.0085318 | 0.032396  | Down-regulated |
| NM_014623    | MEA1          | 4201   | 47.8405 | 51.3155 | 38.7174 | 28.3694 | -0.5265 | 0.0018108 | 0.0085343 | Down-regulated |
| NM_001017964 | acterial)(YDJ | 150223 | 31.9969 | 33.9389 | 24.3864 | 20.4946 | -0.5272 | 0.0001628 | 0.0010007 | Down-regulated |
| NM_001081    | CUBN          | 8029   | 1.9488  | 1.88071 | 1.29925 | 1.30605 | -0.5277 | 0.0003036 | 0.0017573 | Down-regulated |
| NM_001194998 | CEP152        | 22995  | 3.26192 | 3.55636 | 2.19696 | 2.41313 | -0.5284 | 0.0021149 | 0.0097655 | Down-regulated |
| NM_001122838 | NAPEPLD       | 222236 | 3.35925 | 2.87406 | 2.1627  | 2.01616 | -0.5288 | 0.0055934 | 0.0225941 | Down-regulated |
| NM_177924    | ASAH1         | 427    | 168.033 | 169.855 | 112.037 | 120.778 | -0.5291 | 3.35E-26  | 1.40E-24  | Down-regulated |
| NM_033022    | RPS24         | 6229   | 244.917 | 235.644 | 161.191 | 168.531 | -0.5291 | 2.13E-12  | 3.61E-11  | Down-regulated |
| NM_017495    | RBM38         | 55544  | 12.5089 | 11.0074 | 7.36189 | 8.52838 | -0.5291 | 0.0011102 | 0.0055968 | Down-regulated |
| NM_005401    | PTPN14        | 5784   | 2.9756  | 3.25791 | 2.239   | 2.01729 | -0.5293 | 1.44E-05  | 0.0001096 | Down-regulated |
| NM_001135822 | FDP5          | 2224   | 179.117 | 146.433 | 110.793 | 112.044 | -0.5297 | 1.87E-07  | 1.91E-06  | Down-regulated |
| NM_005009    | NME4          | 4833   | 205.423 | 189.722 | 141.585 | 129.725 | -0.5297 | 5.79E-12  | 9.45E-11  | Down-regulated |
| NM_001144012 | TMX2          | 51075  | 15.3634 | 18.0493 | 10.0096 | 12.3979 | -0.53   | 0.0045144 | 0.0187554 | Down-regulated |
| NM_016391    | NOP16         | 51491  | 41.4382 | 40.567  | 27.2374 | 28.774  | -0.5303 | 2.05E-06  | 1.82E-05  | Down-regulated |
| NM_004280    | EEF1E1        | 9521   | 33.2479 | 29.977  | 21.3788 | 21.5464 | -0.5304 | 0.0002226 | 0.0013256 | Down-regulated |
| NM_001130089 | KARS          | 3735   | 18.0851 | 17.9607 | 9.66994 | 14.3934 | -0.531  | 0.0069255 | 0.02711   | Down-regulated |
| NM_001098210 | CTNNB1        | 1499   | 106.213 | 103.226 | 69.7822 | 74.342  | -0.5312 | 8.28E-26  | 3.38E-24  | Down-regulated |
| NM_003780    | B4GALT2       | 8704   | 85.23   | 87.1588 | 58.7845 | 59.7334 | -0.5316 | 2.70E-23  | 9.47E-22  | Down-regulated |
| NM_001244926 | PRPF4         | 9128   | 12.9039 | 11.4605 | 8.23571 | 8.35107 | -0.5318 | 5.40E-05  | 0.0003682 | Down-regulated |
| NR_104173    | LOC283352     | 283352 | 222.682 | 206.32  | 142.524 | 148.598 | -0.5319 | 1.62E-05  | 0.0001224 | Down-regulated |

|              |            |        |         |         |         |         |         |           |           |                |
|--------------|------------|--------|---------|---------|---------|---------|---------|-----------|-----------|----------------|
| NM_003959    | HIP1R      | 9026   | 12.8704 | 12.9586 | 8.8187  | 8.87593 | -0.5326 | 2.68E-09  | 3.39E-08  | Down-regulated |
| NM_052853    | ADCK2      | 90956  | 15.2934 | 14.8848 | 10.3372 | 10.2236 | -0.5328 | 1.16E-05  | 9.03E-05  | Down-regulated |
| NM_001859    | SLC31A1    | 1317   | 18.2362 | 18.573  | 12.4156 | 12.8333 | -0.5328 | 6.27E-13  | 1.12E-11  | Down-regulated |
| NM_004814    | SNRNP40    | 9410   | 33.64   | 32.1362 | 20.9737 | 23.837  | -0.5333 | 4.98E-06  | 4.15E-05  | Down-regulated |
| NM_031157    | HNRNPA1    | 3178   | 66.3254 | 61.745  | 42.5101 | 45.2345 | -0.5334 | 4.45E-12  | 7.32E-11  | Down-regulated |
| NM_138383    | MTSSL1L    | 92154  | 27.8067 | 27.3495 | 19.7286 | 18.1035 | -0.5334 | 2.02E-14  | 4.11E-13  | Down-regulated |
| NM_001098621 | TMEM251    | 26175  | 24.3484 | 23.3645 | 15.9667 | 16.3509 | -0.5335 | 0.0001812 | 0.0010994 | Down-regulated |
| NM_153280    | UBA1       | 7317   | 13.9704 | 18.4446 | 10.459  | 11.417  | -0.5339 | 0.0006384 | 0.0034265 | Down-regulated |
| NM_001317333 | ARIH2      | 10425  | 16.9259 | 15.4151 | 11.6131 | 10.4532 | -0.534  | 3.05E-07  | 3.03E-06  | Down-regulated |
| NM_012456    | TIMM10     | 26519  | 166.551 | 156.808 | 115.133 | 105.205 | -0.535  | 2.58E-08  | 2.92E-07  | Down-regulated |
| NM_012089    | ABCB10     | 23456  | 8.91405 | 8.3086  | 5.85138 | 5.83155 | -0.5351 | 2.34E-05  | 0.0001711 | Down-regulated |
| NM_052969    | RPL39L     | 116832 | 60.6455 | 59.2418 | 42.1672 | 38.7521 | -0.5357 | 0.0001564 | 0.000967  | Down-regulated |
| NM_021922    | FANCE      | 2178   | 6.08927 | 5.80709 | 3.90829 | 4.02259 | -0.5362 | 0.0052932 | 0.0215643 | Down-regulated |
| NM_004749    | TBRG4      | 9238   | 65.9399 | 66.0127 | 45.4697 | 44.9143 | -0.5366 | 1.65E-20  | 5.03E-19  | Down-regulated |
| NM_182705    | RFLNB      | 359845 | 18.3212 | 16.741  | 11.7583 | 12.1618 | -0.5367 | 3.21E-08  | 3.59E-07  | Down-regulated |
| NM_001004722 | NCK2       | 8440   | 8.99698 | 10.3543 | 6.72666 | 6.09454 | -0.5369 | 0.0068472 | 0.0268315 | Down-regulated |
| NM_032368    | LZIC       | 84328  | 11.0864 | 10.7597 | 7.0084  | 7.87007 | -0.537  | 3.70E-07  | 3.64E-06  | Down-regulated |
| NM_138462    | ZMYND19    | 116225 | 28.9443 | 31.5563 | 21.9101 | 18.9701 | -0.5375 | 0.0001184 | 0.0007507 | Down-regulated |
| NM_016292    | TRAP1      | 10131  | 101.22  | 99.0444 | 67.3903 | 69.7583 | -0.5376 | 2.79E-26  | 1.17E-24  | Down-regulated |
| NM_031480    | RIOK1      | 83732  | 9.69453 | 8.99495 | 6.07311 | 6.50061 | -0.5379 | 0.0007236 | 0.0038376 | Down-regulated |
| NM_0024592   | SRD5A3     | 79644  | 4.58951 | 4.41307 | 2.91216 | 3.12377 | -0.538  | 0.0017392 | 0.0082521 | Down-regulated |
| NM_016625    | RSRC1      | 51319  | 16.8701 | 17.2612 | 13.3377 | 9.28162 | -0.5383 | 0.0078876 | 0.0303052 | Down-regulated |
| NM_018321    | BRX1       | 55299  | 52.8044 | 49.6537 | 32.4806 | 37.0984 | -0.5388 | 2.18E-06  | 1.92E-05  | Down-regulated |
| NM_002130    | HMGCS1     | 3157   | 27.7069 | 26.1694 | 17.8162 | 19.0071 | -0.5388 | 3.28E-15  | 7.08E-14  | Down-regulated |
| NM_018122    | DARS2      | 55157  | 32.0327 | 30.8426 | 20.9256 | 22.0132 | -0.5389 | 9.53E-14  | 1.83E-12  | Down-regulated |
| NM_020243    | TOMM22     | 56993  | 84.6323 | 84.6854 | 57.7514 | 57.9295 | -0.539  | 2.86E-15  | 6.21E-14  | Down-regulated |
| NM_002913    | RFC1       | 5981   | 5.54734 | 5.57996 | 3.52863 | 3.98167 | -0.5391 | 0.0001978 | 0.0011933 | Down-regulated |
| NM_017612    | ZCCHC8     | 55596  | 5.14485 | 5.24615 | 3.66905 | 3.31722 | -0.5393 | 0.0006514 | 0.0034881 | Down-regulated |
| NM_019059    | TOMM7      | 54543  | 312.282 | 270.742 | 209.6   | 186.764 | -0.5393 | 3.60E-08  | 4.00E-07  | Down-regulated |
| NM_017588    | WDR5       | 11091  | 12.1638 | 12.0243 | 8.12697 | 8.27864 | -0.5396 | 2.61E-06  | 2.27E-05  | Down-regulated |
| NM_001040446 | MTMR12     | 54545  | 7.17096 | 7.36336 | 5.03984 | 4.81536 | -0.5401 | 2.91E-06  | 2.51E-05  | Down-regulated |
| NM_001085372 | UQC3       | 790955 | 9.67691 | 9.41689 | 6.09281 | 6.6201  | -0.5402 | 0.0025404 | 0.0114343 | Down-regulated |
| NM_201524    | ADGRG1     | 9289   | 37.5448 | 35.0975 | 26.566  | 22.8987 | -0.5403 | 2.32E-09  | 2.95E-08  | Down-regulated |
| NM_014240    | LIMD1      | 8994   | 15.2684 | 15.4728 | 10.6499 | 10.3281 | -0.5409 | 1.14E-14  | 2.36E-13  | Down-regulated |
| NM_018098    | ECT2       | 1894   | 9.48703 | 9.11357 | 7.03896 | 5.46651 | -0.541  | 0.0006201 | 0.0033386 | Down-regulated |
| NM_001145443 | PFKFB3     | 5209   | 15.31   | 15.1981 | 11.3681 | 9.29012 | -0.541  | 9.95E-06  | 7.84E-05  | Down-regulated |
| NM_015238    | WWC1       | 23286  | 2.1301  | 1.9174  | 1.18895 | 1.47518 | -0.5412 | 0.013361  | 0.0472934 | Down-regulated |
| NM_037665    | OC10050654 | 1E+08  | 3.76004 | 3.73359 | 2.53057 | 2.42278 | -0.543  | 0.0047707 | 0.019662  | Down-regulated |
| NM_001259    | CDK6       | 1021   | 4.37765 | 2.79405 | 2.51843 | 2.19716 | -0.5433 | 0.0103419 | 0.0381104 | Down-regulated |
| NM_001293213 | TUBB       | 203068 | 8.29707 | 7.15519 | 5.04793 | 5.18519 | -0.5437 | 0.0067945 | 0.0266576 | Down-regulated |
| NM_182524    | ZNF595     | 152687 | 13.9287 | 13.4199 | 9.35544 | 9.1474  | -0.5438 | 1.92E-06  | 1.71E-05  | Down-regulated |
| NM_015009    | PDZRN3     | 23024  | 7.67092 | 7.18435 | 5.17828 | 4.83866 | -0.5443 | 4.03E-05  | 0.0002811 | Down-regulated |
| NM_182639    | HPS1       | 3257   | 13.7488 | 15.0418 | 11.0623 | 7.82071 | -0.5444 | 0.0114415 | 0.0415141 | Down-regulated |
| NM_000943    | PPIC       | 5480   | 38.1577 | 36.1784 | 24.0368 | 26.1742 | -0.5446 | 8.18E-06  | 6.55E-05  | Down-regulated |
| NM_001042467 | MLPH       | 79083  | 15.8215 | 19.3006 | 11.4796 | 12.2222 | -0.5446 | 2.07E-05  | 0.0001527 | Down-regulated |
| NM_133266    | SHANK2     | 22941  | 8.14777 | 8.6012  | 5.99798 | 5.36277 | -0.5449 | 1.39E-08  | 1.62E-07  | Down-regulated |
| NM_002157    | member 1(f | 3336   | 374.127 | 346.121 | 240.306 | 249.62  | -0.5449 | 2.45E-19  | 7.00E-18  | Down-regulated |
| NM_018677    | ACSS2      | 55902  | 69.6805 | 66.5706 | 46.6071 | 46.2157 | -0.545  | 5.24E-24  | 1.92E-22  | Down-regulated |
| NM_006101    | NDC80      | 10403  | 7.90003 | 7.77931 | 4.97777 | 5.39579 | -0.5457 | 0.00329   | 0.0142643 | Down-regulated |
| NM_001271783 | FAR2       | 55711  | 21.252  | 21.2352 | 13.6931 | 15.14   | -0.5458 | 4.25E-10  | 5.88E-09  | Down-regulated |
| NM_001160130 | KCNQ5      | 56479  | 3.55323 | 3.25578 | 2.33157 | 2.23396 | -0.5458 | 0.0004524 | 0.002517  | Down-regulated |
| NM_001048210 | CLCC1      | 23155  | 3.0921  | 3.57393 | 2.40217 | 1.97253 | -0.5462 | 0.0085787 | 0.0325349 | Down-regulated |
| NM_001253875 | UXS1       | 80146  | 12.8326 | 11.6836 | 7.63282 | 8.74106 | -0.5467 | 0.0007914 | 0.0041596 | Down-regulated |
| NM_024573    | ARMT1      | 79624  | 9.23373 | 10.0643 | 6.08426 | 6.81445 | -0.5467 | 0.0005768 | 0.0031285 | Down-regulated |
| NM_198887    | NUP43      | 348995 | 6.02735 | 5.74137 | 4.01693 | 3.85136 | -0.5468 | 0.000351  | 0.002004  | Down-regulated |
| NM_001256763 | FAM49B     | 51571  | 14.1    | 11.8783 | 9.48561 | 7.92308 | -0.5471 | 0.0001704 | 0.0010415 | Down-regulated |
| NM_013367    | ANAPC4     | 29945  | 7.65205 | 7.69994 | 5.21969 | 5.03383 | -0.5472 | 0.0007869 | 0.0041421 | Down-regulated |
| NM_001212    | CIQBP      | 708    | 378.968 | 360.98  | 244.25  | 258.708 | -0.5473 | 3.74E-25  | 1.47E-23  | Down-regulated |
| NM_178557    | NAT8L      | 339983 | 29.2363 | 30.1661 | 20.9487 | 19.4132 | -0.5477 | 1.31E-17  | 3.31E-16  | Down-regulated |
| NM_002886    | RAP2B      | 5912   | 11.1646 | 10.8373 | 7.72469 | 7.20295 | -0.5482 | 1.14E-12  | 1.97E-11  | Down-regulated |
| NM_014873    | LPGAT1     | 9926   | 6.60903 | 6.79815 | 4.50386 | 4.57213 | -0.5482 | 8.46E-09  | 1.01E-07  | Down-regulated |
| NM_014412    | CACYBP     | 27101  | 50.1238 | 51.8601 | 35.0415 | 34.258  | -0.5482 | 1.95E-20  | 5.92E-19  | Down-regulated |
| NM_138342    | GLB1L2     | 89944  | 11.6823 | 12.0936 | 7.60533 | 8.41035 | -0.5483 | 1.15E-05  | 8.93E-05  | Down-regulated |
| NM_020925    | CACHD1     | 57685  | 2.64877 | 2.79912 | 1.79995 | 1.7876  | -0.5484 | 0.0043559 | 0.0181763 | Down-regulated |
| NM_004260    | RECQL4     | 9401   | 24.885  | 27.1226 | 18.5193 | 16.6678 | -0.5488 | 2.93E-09  | 3.69E-08  | Down-regulated |
| NM_014463    | LSM3       | 27258  | 243.66  | 224.149 | 155.297 | 160.992 | -0.5493 | 9.61E-12  | 1.54E-10  | Down-regulated |
| NM_001135146 | SLC39A8    | 64116  | 7.27755 | 8.58022 | 5.67795 | 4.85587 | -0.5494 | 0.0018345 | 0.0086206 | Down-regulated |
| NM_001172128 | IL16       | 3603   | 7.02908 | 7.31988 | 5.10474 | 4.58449 | -0.5496 | 5.54E-08  | 6.04E-07  | Down-regulated |
| NM_001281496 | PHB        | 5245   | 74.2332 | 69.9852 | 54.26   | 42.7729 | -0.5505 | 4.16E-06  | 3.51E-05  | Down-regulated |
| NM_000019    | ACAT1      | 38     | 39.7277 | 37.706  | 25.3077 | 27.0512 | -0.5506 | 1.92E-10  | 2.77E-09  | Down-regulated |
| NM_152667    | NANP       | 140838 | 3.79548 | 3.43777 | 2.34317 | 2.40398 | -0.551  | 0.006577  | 0.0259108 | Down-regulated |
| NM_001040694 | INCENP     | 3619   | 13.5709 | 14.9696 | 9.64543 | 9.61967 | -0.5512 | 5.33E-08  | 5.81E-07  | Down-regulated |
| NM_000214    | JAG1       | 182    | 4.15031 | 4.81931 | 2.97789 | 3.00868 | -0.5516 | 0.0003208 | 0.0018471 | Down-regulated |
| NM_032822    | FAM136A    | 84908  | 32.3414 | 27.3607 | 18.6071 | 21.3456 | -0.5517 | 6.84E-05  | 0.0004558 | Down-regulated |
| NM_025179    | PLXNA2     | 5362   | 2.13665 | 2.37736 | 1.60386 | 1.40572 | -0.5519 | 0.0004084 | 0.0022991 | Down-regulated |
| NM_001037330 | TRIM16L    | 147166 | 8.0063  | 6.95118 | 4.6531  | 5.10336 | -0.5524 | 0.0087056 | 0.0329054 | Down-regulated |
| NM_017838    | NHP2       | 55651  | 453.936 | 428.364 | 295.744 | 301.595 | -0.5525 | 1.38E-25  | 5.53E-24  | Down-regulated |
| NM_181333    | PRR5       | 55615  | 36.5468 | 35.1541 | 23.9561 | 24.416  | -0.5527 | 8.40E-10  | 1.12E-08  | Down-regulated |
| NM_001436    | FBL        | 2091   | 181.46  | 171.122 | 123.158 | 115.363 | -0.5528 | 1.22E-16  | 2.86E-15  | Down-regulated |
| NM_032340    | UQC3       | 84300  | 49.4238 | 42.0331 | 30.1405 | 31.1658 | -0.5534 | 7.03E-06  | 5.71E-05  | Down-regulated |
| NM_021953    | FOXM1      | 2305   | 14.3555 | 11.7372 | 9.21986 | 8.19532 | -0.5535 | 0.0001536 | 0.0009518 | Down-regulated |
| NM_001199174 | MLST8      | 64223  | 51.8313 | 51.045  | 35.3997 | 34.0749 | -0.5539 | 2.00E-12  | 3.40E-11  | Down-regulated |
| NM_000136    | FANCC      | 2176   | 3.71007 | 3.61468 | 2.64153 | 2.17335 | -0.554  | 0.0042922 | 0.0179496 | Down-regulated |
| NM_003234    | TFRC       | 7037   | 20.1211 | 18.9019 | 13.5287 | 12.8264 | -0.5546 | 4.26E-13  | 7.74E-12  | Down-regulated |

|              |              |        |         |         |         |         |         |           |           |                |
|--------------|--------------|--------|---------|---------|---------|---------|---------|-----------|-----------|----------------|
| NM_001042371 | PGP          | 283871 | 26.3024 | 25.7265 | 18.0998 | 16.9881 | -0.5547 | 1.24E-11  | 1.96E-10  | Down-regulated |
| NM_001122821 | SET          | 6418   | 17.6889 | 15.4342 | 11.6245 | 10.5457 | -0.5548 | 1.51E-05  | 0.0001149 | Down-regulated |
| NM_178448    | SAPCD2       | 89958  | 19.3542 | 19.0276 | 13.6158 | 12.23   | -0.555  | 2.43E-09  | 3.09E-08  | Down-regulated |
| NM_018085    | IPO9         | 55705  | 7.76887 | 7.67155 | 5.0714  | 5.35375 | -0.5553 | 9.86E-14  | 1.89E-12  | Down-regulated |
| NM_0022662   | ANAPC1       | 64682  | 9.50323 | 9.97548 | 6.6349  | 6.49864 | -0.5553 | 1.03E-11  | 1.65E-10  | Down-regulated |
| NM_001031835 | PHKB         | 5257   | 6.34763 | 6.39717 | 4.57658 | 3.95488 | -0.5554 | 2.83E-05  | 0.0002032 | Down-regulated |
| NM_005030    | PLK1         | 5347   | 43.2696 | 41.4882 | 28.3765 | 28.823  | -0.5558 | 8.52E-14  | 1.64E-12  | Down-regulated |
| NM_172217    | IL16         | 3603   | 22.0726 | 22.8865 | 14.7329 | 15.6414 | -0.5565 | 1.49E-20  | 4.57E-19  | Down-regulated |
| NM_000533    | PLP1         | 5354   | 25.8746 | 21.8715 | 16.791  | 15.1742 | -0.5569 | 3.29E-06  | 2.82E-05  | Down-regulated |
| NM_002520    | NPM1         | 4869   | 971.902 | 956.753 | 641.654 | 662.022 | -0.5576 | 3.20E-67  | 4.13E-65  | Down-regulated |
| NM_001159746 | ABR          | 29     | 19.9741 | 21.5912 | 15.2329 | 12.6612 | -0.5576 | 2.24E-07  | 2.27E-06  | Down-regulated |
| NM_170784    | MKKS         | 8195   | 14.1979 | 16.0324 | 10.4626 | 9.7347  | -0.5581 | 7.76E-06  | 6.24E-05  | Down-regulated |
| NM_018405    | COPRS        | 55352  | 74.7444 | 71.4728 | 46.5444 | 51.3216 | -0.5589 | 2.58E-07  | 2.59E-06  | Down-regulated |
| NM_003201    | TFAM         | 7019   | 8.22563 | 8.23508 | 5.15506 | 5.86577 | -0.559  | 2.34E-06  | 2.05E-05  | Down-regulated |
| NR_135259    | RPL22L1      | 200916 | 8.78343 | 7.58184 | 5.28117 | 5.40063 | -0.5593 | 0.0046464 | 0.0192287 | Down-regulated |
| NM_014181    | LGALS1       | 29094  | 6.71676 | 6.86324 | 4.58424 | 4.44405 | -0.5595 | 7.56E-05  | 0.000499  | Down-regulated |
| NM_001079524 | PAICS        | 10606  | 49.611  | 53.5054 | 31.6314 | 37.5504 | -0.5598 | 9.13E-09  | 1.09E-07  | Down-regulated |
| NM_001308048 | PRUNE2       | 158471 | 5.15493 | 4.77011 | 2.58294 | 3.93524 | -0.5598 | 0.0027264 | 0.0121375 | Down-regulated |
| NM_052845    | iciency)cblB | 326625 | 9.62871 | 9.30129 | 6.13724 | 6.51522 | -0.56   | 1.30E-06  | 1.19E-05  | Down-regulated |
| NM_023077    | utative)(COA | 65260  | 23.1708 | 20.7874 | 14.2104 | 15.1514 | -0.5604 | 3.58E-06  | 3.05E-05  | Down-regulated |
| NM_000788    | DCK          | 1633   | 11.7604 | 11.3634 | 7.69754 | 7.71337 | -0.5605 | 2.52E-05  | 0.0001833 | Down-regulated |
| NM_016400    | HYPK         | 25764  | 53.7205 | 49.7103 | 35.3051 | 33.9997 | -0.5606 | 1.41E-08  | 1.64E-07  | Down-regulated |
| NM_016622    | MRPL35       | 51318  | 13.6256 | 13.8242 | 8.88808 | 9.48524 | -0.5607 | 2.13E-07  | 2.17E-06  | Down-regulated |
| NM_000523    | HOXD13       | 3239   | 9.33069 | 9.79473 | 6.54627 | 6.09114 | -0.5614 | 0.0005153 | 0.0028242 | Down-regulated |
| NM_213566    | DFFA         | 1676   | 7.78659 | 7.03001 | 4.38671 | 5.37096 | -0.5627 | 0.0011989 | 0.0059863 | Down-regulated |
| NM_003566    | EEA1         | 8411   | 12.8317 | 13.2222 | 8.73175 | 8.78194 | -0.5629 | 7.20E-17  | 1.73E-15  | Down-regulated |
| NM_001102575 | SNX18        | 112574 | 10.6119 | 10.9736 | 7.18495 | 7.27479 | -0.5629 | 1.38E-09  | 1.80E-08  | Down-regulated |
| NM_001134493 | TOMM6        | 1E+08  | 143.637 | 140.691 | 94.9738 | 95.5968 | -0.563  | 3.47E-14  | 6.97E-13  | Down-regulated |
| NM_006928    | PMEL         | 6490   | 595.217 | 659.827 | 426.408 | 417.496 | -0.5633 | 2.46E-23  | 8.65E-22  | Down-regulated |
| NM_203486    | DLL3         | 10683  | 6.43278 | 6.45332 | 3.90214 | 4.4325  | -0.5634 | 0.0092283 | 0.0345735 | Down-regulated |
| NM_002158    | FOXN2        | 3344   | 8.08535 | 8.43614 | 5.23599 | 5.78545 | -0.5646 | 6.14E-07  | 5.86E-06  | Down-regulated |
| NM_012310    | KIF4A        | 24137  | 10.1877 | 10.5515 | 7.0598  | 6.7948  | -0.565  | 6.01E-08  | 6.51E-07  | Down-regulated |
| NM_001199344 | RPL17        | 6139   | 271.415 | 241.48  | 184.034 | 158.138 | -0.5654 | 2.37E-08  | 2.70E-07  | Down-regulated |
| NM_006413    | RPP30        | 10556  | 10.0036 | 9.3394  | 6.45323 | 6.30243 | -0.5659 | 0.0003742 | 0.0021226 | Down-regulated |
| NM_020148    | SPIRE1       | 56907  | 12.6568 | 13.9809 | 8.49324 | 9.28457 | -0.5662 | 2.06E-08  | 2.36E-07  | Down-regulated |
| NM_001174130 | SLC11A2      | 4891   | 11.1376 | 11.6592 | 8.16282 | 6.97518 | -0.5672 | 5.04E-06  | 4.19E-05  | Down-regulated |
| NM_001321196 | SLC27A5      | 10998  | 5.72187 | 5.55359 | 3.64758 | 3.61766 | -0.5679 | 0.0102703 | 0.0379052 | Down-regulated |
| NM_004900    | APOBEC3B     | 9582   | 44.8448 | 37.8774 | 24.4123 | 30.1741 | -0.568  | 0.0001396 | 0.0008736 | Down-regulated |
| NM_014640    | TTL4         | 9654   | 13.7452 | 14.0521 | 9.39681 | 9.18784 | -0.5682 | 8.56E-12  | 1.37E-10  | Down-regulated |
| NM_006530    | YEATS4       | 8089   | 16.6384 | 18.076  | 10.2077 | 12.4783 | -0.5683 | 0.0013383 | 0.0066008 | Down-regulated |
| NM_030817    | APOLD1       | 81575  | 13.5143 | 16.7299 | 10.1617 | 9.90727 | -0.5687 | 8.00E-06  | 6.42E-05  | Down-regulated |
| NM_001304275 | RAPGEF1      | 2889   | 7.50598 | 7.21806 | 5.02553 | 4.76922 | -0.5693 | 8.81E-08  | 9.36E-07  | Down-regulated |
| NM_004104    | FASN         | 2194   | 231.556 | 243.704 | 163.67  | 154.89  | -0.5695 | 2.48E-35  | 1.41E-33  | Down-regulated |
| NM_001095    | ASIC1        | 41     | 9.76972 | 10.1048 | 6.67594 | 6.53738 | -0.5698 | 7.76E-07  | 7.33E-06  | Down-regulated |
| NM_001320732 | CAPG         | 822    | 158.944 | 129.083 | 84.7777 | 105.588 | -0.5699 | 2.45E-05  | 0.0001784 | Down-regulated |
| NM_006427    | SIVA1        | 10572  | 36.6573 | 44.722  | 25.5845 | 27.4219 | -0.5699 | 0.001928  | 0.0090068 | Down-regulated |
| NM_000819    | GART         | 2618   | 28.8991 | 27.0167 | 20.4421 | 16.6697 | -0.5704 | 1.04E-06  | 9.58E-06  | Down-regulated |
| NM_175732    | PTPMT1       | 114971 | 7.70624 | 7.2533  | 4.65904 | 5.11816 | -0.5705 | 0.0010178 | 0.0051886 | Down-regulated |
| NM_173491    | LSM11        | 134353 | 2.35516 | 2.46906 | 1.64472 | 1.49083 | -0.5708 | 0.0022403 | 0.0102505 | Down-regulated |
| NM_001134875 | C14orf80     | 283643 | 13.892  | 14.9742 | 8.1346  | 10.5921 | -0.5709 | 0.0029408 | 0.0129471 | Down-regulated |
| NM_173156    | SMG7         | 9887   | 6.53473 | 5.18802 | 4.58966 | 2.88973 | -0.571  | 0.0128225 | 0.0456831 | Down-regulated |
| NM_002946    | RPA2         | 6118   | 36.5883 | 37.2943 | 23.9464 | 25.2538 | -0.5714 | 5.95E-10  | 8.06E-09  | Down-regulated |
| NM_174911    | FAM84B       | 157638 | 8.24229 | 9.33462 | 5.78283 | 5.88657 | -0.5714 | 9.27E-07  | 8.64E-06  | Down-regulated |
| NM_003720    | PSMG1        | 8624   | 44.9459 | 39.6734 | 28.5679 | 27.3798 | -0.5717 | 8.59E-06  | 6.85E-05  | Down-regulated |
| NM_001904    | CTNNB1       | 1499   | 80.6132 | 89.2372 | 60.9712 | 52.1533 | -0.5719 | 2.15E-10  | 3.08E-09  | Down-regulated |
| NM_000431    | MVK          | 4598   | 13.5216 | 15.6421 | 9.02503 | 10.1105 | -0.5728 | 0.0003097 | 0.0017901 | Down-regulated |
| NR_003098    | SNHG1        | 23642  | 37.6513 | 41.8666 | 26.5539 | 25.9146 | -0.5732 | 9.24E-06  | 7.33E-05  | Down-regulated |
| NM_001002800 | SMC4         | 10051  | 14.4945 | 14.7801 | 8.92807 | 10.5095 | -0.5739 | 3.70E-08  | 4.11E-07  | Down-regulated |
| NR_026641    | INTS2        | 57508  | 3.38925 | 2.55857 | 1.93905 | 1.8821  | -0.574  | 0.0057958 | 0.0232258 | Down-regulated |
| NM_001004106 | GRK6         | 2870   | 8.18551 | 8.48869 | 5.93995 | 4.96545 | -0.5741 | 0.0005706 | 0.0030967 | Down-regulated |
| NM_001305142 | NMRAL1       | 57407  | 14.929  | 12.4435 | 8.52378 | 9.02473 | -0.5741 | 0.0065513 | 0.0258467 | Down-regulated |
| NM_015135    | NUP205       | 23165  | 24.346  | 24.529  | 16.3233 | 16.291  | -0.5744 | 2.69E-25  | 1.07E-23  | Down-regulated |
| NM_001032291 | PSRC1        | 84722  | 10.0864 | 10.6786 | 5.68116 | 7.57799 | -0.5746 | 0.0082465 | 0.0314752 | Down-regulated |
| NM_032777    | ADGRA2       | 25960  | 9.75808 | 9.75857 | 6.56786 | 6.40618 | -0.5747 | 1.43E-10  | 2.09E-09  | Down-regulated |
| NM_001330104 | CDC16        | 8881   | 7.06957 | 8.36331 | 5.65127 | 4.17402 | -0.5749 | 0.010946  | 0.0399894 | Down-regulated |
| NM_002519    | NPAT         | 4863   | 4.15849 | 4.17175 | 2.53973 | 2.91865 | -0.5751 | 0.0002    | 0.0012061 | Down-regulated |
| NM_006401    | ANP32B       | 10541  | 117.161 | 114.24  | 74.132  | 80.0268 | -0.5754 | 6.18E-19  | 1.69E-17  | Down-regulated |
| NM_015889    | MED15        | 51586  | 35.7491 | 38.9047 | 24.1237 | 25.529  | -0.5758 | 2.26E-13  | 4.21E-12  | Down-regulated |
| NM_058216    | RAD51C       | 5889   | 17.3455 | 18.9465 | 11.0014 | 12.6112 | -0.5768 | 0.0010748 | 0.0054413 | Down-regulated |
| NM_001174102 | PRR7         | 80758  | 17.1665 | 13.8296 | 9.95904 | 9.97533 | -0.5771 | 0.0041578 | 0.0174714 | Down-regulated |
| NM_002298    | LCP1         | 3936   | 6.46203 | 6.12731 | 3.71271 | 4.49098 | -0.5772 | 0.0006842 | 0.0036444 | Down-regulated |
| NM_144772    | epimerase(N  | 128240 | 76.0398 | 72.2713 | 49.1169 | 49.1299 | -0.5781 | 4.92E-11  | 7.46E-10  | Down-regulated |
| NM_015463    | CNRIP1       | 25927  | 14.9092 | 16.3074 | 10.3202 | 10.1523 | -0.5785 | 3.56E-05  | 0.0002505 | Down-regulated |
| NM_002424    | MMP8         | 4317   | 17.324  | 17.3234 | 10.7219 | 12.1616 | -0.5786 | 1.84E-07  | 1.89E-06  | Down-regulated |
| NM_001995    | ACSL1        | 2180   | 37.698  | 35.6529 | 24.4557 | 24.3035 | -0.5787 | 8.54E-20  | 2.49E-18  | Down-regulated |
| NM_001256689 | MELK         | 9833   | 8.78488 | 7.44905 | 5.47742 | 5.01851 | -0.5793 | 0.0021199 | 0.0097789 | Down-regulated |
| NM_003714    | STC2         | 8614   | 2.66012 | 2.81986 | 1.75262 | 1.78408 | -0.5795 | 0.002529  | 0.0113885 | Down-regulated |
| NM_030922    | NIP2         | 81614  | 7.11757 | 7.67372 | 4.57107 | 5.09079 | -0.5803 | 0.0002604 | 0.0015278 | Down-regulated |
| NM_015380    | SAMM50       | 25813  | 42.8391 | 38.5529 | 27.0047 | 26.7637 | -0.5804 | 5.32E-09  | 6.53E-08  | Down-regulated |
| NM_001042539 | MAZ          | 4150   | 65.8644 | 66.9982 | 46.4071 | 41.7288 | -0.5807 | 3.22E-16  | 7.38E-15  | Down-regulated |
| NM_001135032 | EVA1A        | 84141  | 15.8519 | 14.2687 | 10.0973 | 9.5953  | -0.5808 | 0.0001345 | 0.000845  | Down-regulated |
| NM_138410    | CMTM7        | 112616 | 40.748  | 38.9365 | 26.5833 | 25.9663 | -0.581  | 4.05E-08  | 4.48E-07  | Down-regulated |
| NM_032304    | HAGHL        | 84264  | 29.0378 | 30.414  | 19.8751 | 19.1791 | -0.5814 | 2.34E-06  | 2.05E-05  | Down-regulated |
| NM_003634    | egans)(NIPSN | 8508   | 37.5704 | 33.8393 | 23.5063 | 23.6818 | -0.5815 | 5.03E-10  | 6.91E-09  | Down-regulated |

|              |               |        |         |         |         |         |         |           |           |                |
|--------------|---------------|--------|---------|---------|---------|---------|---------|-----------|-----------|----------------|
| NM_012321    | LSM4          | 25804  | 51.2311 | 48.6576 | 32.68   | 33.4373 | -0.5819 | 2.94E-13  | 5.41E-12  | Down-regulated |
| NM_001618    | e) polymerase | 142    | 59.7513 | 58.5106 | 39.9616 | 38.5716 | -0.5824 | 5.76E-32  | 2.98E-30  | Down-regulated |
| NM_015190    | member C9(C   | 23234  | 21.6592 | 20.3398 | 13.5747 | 14.0772 | -0.583  | 5.32E-08  | 5.81E-07  | Down-regulated |
| NM_006014    | LAGE3         | 8270   | 88.7258 | 85.6868 | 58.0722 | 56.8925 | -0.5837 | 7.53E-11  | 1.12E-09  | Down-regulated |
| NM_005079    | TPD52         | 7163   | 22.0688 | 20.3054 | 14.2281 | 13.7714 | -0.5838 | 6.89E-12  | 1.12E-10  | Down-regulated |
| NM_020448    | NIPAL3        | 57185  | 16.8949 | 19.7528 | 11.2445 | 12.8488 | -0.5851 | 2.68E-07  | 2.68E-06  | Down-regulated |
| NM_152406    | AFAP1L1       | 134265 | 10.9152 | 10.8458 | 6.83494 | 7.52123 | -0.5851 | 3.67E-10  | 5.13E-09  | Down-regulated |
| NM_003920    | TIMELESS      | 8914   | 13.5499 | 12.6057 | 8.86492 | 8.38029 | -0.5851 | 2.79E-10  | 3.95E-09  | Down-regulated |
| NM_001017928 | CCDC58        | 131076 | 43.6537 | 40.5467 | 25.1467 | 29.0864 | -0.586  | 0.0010521 | 0.0053394 | Down-regulated |
| NM_003875    | GMPS          | 8833   | 31.8638 | 32.6534 | 21.0973 | 21.4899 | -0.5861 | 3.59E-13  | 6.57E-12  | Down-regulated |
| NM_001291324 | BAHCC1        | 57597  | 11.4717 | 12.3846 | 8.03582 | 7.72934 | -0.5862 | 1.53E-15  | 3.38E-14  | Down-regulated |
| NM_003636    | KCNAB2        | 8514   | 14.4562 | 14.8498 | 10.5267 | 8.68388 | -0.5863 | 1.53E-06  | 1.38E-05  | Down-regulated |
| NM_148904    | OSBPL9        | 114883 | 11.7626 | 16.4867 | 7.40995 | 10.5621 | -0.5866 | 0.0057323 | 0.0230388 | Down-regulated |
| NM_032588    | TRIM63        | 84676  | 37.6567 | 33.9304 | 23.1777 | 23.8601 | -0.5877 | 2.11E-08  | 2.41E-07  | Down-regulated |
| NM_001270623 | SLC16A7       | 9194   | 1.61297 | 1.53888 | 1.01227 | 1.03086 | -0.5878 | 0.0003574 | 0.0020384 | Down-regulated |
| NM_001164665 | KIAA1549      | 57670  | 1.57747 | 2.10413 | 1.22543 | 1.1315  | -0.5894 | 0.0028872 | 0.0127433 | Down-regulated |
| NM_001080450 | BEND3         | 57673  | 2.09154 | 2.02651 | 1.41745 | 1.19326 | -0.5895 | 0.0047083 | 0.0194426 | Down-regulated |
| NM_006191    | PA2G4         | 5036   | 121.426 | 116.481 | 76.6284 | 80.4989 | -0.5897 | 6.38E-31  | 3.17E-29  | Down-regulated |
| NM_004854    | CHST10        | 9486   | 8.56114 | 8.1115  | 5.42588 | 5.39259 | -0.5908 | 0.0001063 | 0.0006805 | Down-regulated |
| NM_001271146 | ST3GAL6       | 10402  | 23.0911 | 21.0537 | 12.806  | 15.9661 | -0.591  | 5.30E-06  | 4.40E-05  | Down-regulated |
| NM_000786    | CYP51A1       | 1595   | 79.7343 | 81.1159 | 54.6387 | 51.4749 | -0.5915 | 5.80E-29  | 2.70E-27  | Down-regulated |
| NM_020169    | LXN           | 56925  | 37.5973 | 31.7611 | 21.2667 | 23.5753 | -0.5915 | 0.0001579 | 0.0009745 | Down-regulated |
| NM_004453    | ETFDH         | 2110   | 5.60883 | 6.22822 | 4.10704 | 3.34504 | -0.5916 | 0.0076919 | 0.0296846 | Down-regulated |
| NM_032361    | THOC3         | 84321  | 34.5945 | 34.554  | 22.3053 | 23.0174 | -0.5917 | 4.28E-09  | 5.31E-08  | Down-regulated |
| NM_002271    | IPO5          | 3843   | 17.6503 | 16.8189 | 11.095  | 11.5902 | -0.5919 | 3.49E-16  | 7.97E-15  | Down-regulated |
| NM_006940    | SOX5          | 6660   | 2.59355 | 3.79428 | 1.98757 | 2.04851 | -0.5924 | 0.0068638 | 0.0268854 | Down-regulated |
| NM_182526    | TMEM229B      | 161145 | 15.1181 | 15.4923 | 10.4102 | 9.65318 | -0.5933 | 3.09E-10  | 4.35E-09  | Down-regulated |
| NM_024884    | L2HGDH        | 79944  | 2.6465  | 2.65135 | 1.69406 | 1.70663 | -0.5936 | 0.0009639 | 0.0049467 | Down-regulated |
| NM_212552    | BOLA3         | 388962 | 67.7594 | 62.8665 | 43.3026 | 40.2338 | -0.5955 | 0.0006468 | 0.0034666 | Down-regulated |
| NM_006230    | POLD2         | 5425   | 71.2302 | 68.8121 | 46.0384 | 45.8786 | -0.5957 | 1.91E-17  | 4.74E-16  | Down-regulated |
| NM_001316772 | GARS          | 2617   | 10.1662 | 6.68914 | 4.76577 | 5.69027 | -0.5969 | 0.0135557 | 0.0478581 | Down-regulated |
| NM_181521    | CMTM4         | 146223 | 2.44532 | 2.58768 | 1.56976 | 1.66478 | -0.5983 | 0.0002162 | 0.0012917 | Down-regulated |
| NR_037669    | GGCT          | 79017  | 17.4182 | 16.3153 | 8.94318 | 12.0472 | -0.5986 | 0.010989  | 0.0401238 | Down-regulated |
| NR_036623    | DBF4B         | 80174  | 8.72713 | 9.67381 | 5.76504 | 6.13936 | -0.5988 | 1.92E-05  | 0.0001424 | Down-regulated |
| NM_152420    | CARNMT1       | 138199 | 5.77806 | 4.71248 | 2.98007 | 3.67915 | -0.599  | 0.0021638 | 0.0099482 | Down-regulated |
| NM_006443    | DNPH1         | 10591  | 94.485  | 90.2852 | 62.1782 | 57.4023 | -0.5991 | 1.66E-06  | 1.49E-05  | Down-regulated |
| NM_001901    | CTGF          | 1490   | 11.8281 | 13.3205 | 7.75516 | 8.44086 | -0.6003 | 7.91E-05  | 0.0005202 | Down-regulated |
| NM_001243953 | KIF2A         | 3796   | 6.49277 | 5.26987 | 3.60128 | 3.91234 | -0.6003 | 0.0008239 | 0.0043082 | Down-regulated |
| NM_004462    | FDFT1         | 2222   | 244.026 | 224.548 | 156.244 | 150.826 | -0.6004 | 7.77E-28  | 3.48E-26  | Down-regulated |
| NM_148923    | CYB5A         | 1528   | 58.2156 | 62.4033 | 36.7303 | 41.2339 | -0.6013 | 6.38E-06  | 5.23E-05  | Down-regulated |
| NM_012460    | TIMM9         | 26520  | 18.8046 | 17.2516 | 11.2528 | 11.6572 | -0.6017 | 0.0008797 | 0.0045748 | Down-regulated |
| NM_205850    | SLC24A5       | 283652 | 62.8484 | 64.4989 | 40.0904 | 43.0772 | -0.6017 | 3.79E-14  | 7.58E-13  | Down-regulated |
| NM_005500    | SAE1          | 10055  | 86.3303 | 82.0933 | 53.3699 | 56.8074 | -0.6021 | 7.43E-23  | 2.54E-21  | Down-regulated |
| NM_138443    | HAUS1         | 115106 | 28.6232 | 28.0016 | 17.142  | 19.2997 | -0.6022 | 7.26E-05  | 0.0004808 | Down-regulated |
| NM_016368    | ISYNA1        | 51477  | 28.1113 | 26.6728 | 18.0003 | 17.689  | -0.6022 | 3.91E-11  | 5.97E-10  | Down-regulated |
| NM_020921    | NIN           | 51199  | 7.12564 | 7.44917 | 4.72868 | 4.79122 | -0.6023 | 1.15E-13  | 2.20E-12  | Down-regulated |
| NM_003600    | AURKA         | 6790   | 6.10595 | 5.40759 | 3.37739 | 3.8161  | -0.6034 | 0.0055999 | 0.0226066 | Down-regulated |
| NM_030811    | MRPS26        | 64949  | 41.9272 | 39.4571 | 25.5934 | 27.0314 | -0.6034 | 3.22E-06  | 2.77E-05  | Down-regulated |
| NM_018211    | RAVER2        | 55225  | 2.84447 | 3.41452 | 1.97749 | 1.94372 | -0.6035 | 0.0051424 | 0.0210222 | Down-regulated |
| NM_017547    | FOXRED1       | 55572  | 14.5661 | 12.9861 | 8.93471 | 8.781   | -0.6043 | 5.49E-05  | 0.0003734 | Down-regulated |
| NM_152903    | KBTD6         | 89890  | 2.63697 | 3.09665 | 1.77013 | 1.85744 | -0.6045 | 0.002893  | 0.0127659 | Down-regulated |
| NM_001242659 | FNDC10        | 643988 | 22.8591 | 22.345  | 14.3118 | 15.0124 | -0.6047 | 2.52E-08  | 2.85E-07  | Down-regulated |
| NM_001252499 | RHNO1         | 83695  | 10.2149 | 10.5225 | 7.28328 | 5.84027 | -0.605  | 0.0017998 | 0.0084911 | Down-regulated |
| NM_001170543 | PGAM5         | 192111 | 12.8548 | 13.4281 | 9.12417 | 7.81113 | -0.6051 | 1.05E-05  | 8.23E-05  | Down-regulated |
| NM_130384    | ATRIP         | 84126  | 7.82454 | 7.33769 | 4.97086 | 4.69786 | -0.606  | 0.0004197 | 0.0023558 | Down-regulated |
| NM_001284364 | ULK3          | 25989  | 26.7555 | 25.3865 | 17.1277 | 16.7467 | -0.6064 | 1.15E-11  | 1.84E-10  | Down-regulated |
| NM_001843    | CNTN1         | 1272   | 2.68485 | 2.75626 | 1.74558 | 1.70236 | -0.6064 | 0.0011105 | 0.0055968 | Down-regulated |
| NR_130789    | MIEF1         | 54471  | 7.39197 | 9.72778 | 6.15499 | 4.70097 | -0.6065 | 0.0011248 | 0.0056572 | Down-regulated |
| NM_003071    | HLTF          | 6596   | 7.02157 | 5.87725 | 3.5111  | 4.67208 | -0.6066 | 0.0010013 | 0.0051181 | Down-regulated |
| NM_003095    | SNRPF         | 6636   | 127.96  | 116.342 | 78.9843 | 79.3686 | -0.607  | 3.50E-10  | 4.90E-09  | Down-regulated |
| NM_001291366 | PERM1         | 84808  | 8.48542 | 10.659  | 7.31936 | 4.49718 | -0.6077 | 0.010582  | 0.0388603 | Down-regulated |
| NM_001001790 | TOMM5         | 401505 | 148.998 | 130.449 | 89.4543 | 91.222  | -0.6082 | 7.49E-09  | 9.02E-08  | Down-regulated |
| NM_005192    | CDKN3         | 1033   | 45.0446 | 43.1674 | 27.8682 | 28.8332 | -0.6084 | 8.05E-06  | 6.45E-05  | Down-regulated |
| NM_001080826 | SGK223        | 157285 | 12.3423 | 13.1184 | 8.85172 | 7.59332 | -0.609  | 1.25E-07  | 1.31E-06  | Down-regulated |
| NM_024775    | GEMIN6        | 79833  | 59.0305 | 53.0972 | 37.9016 | 33.4701 | -0.6092 | 0.0001842 | 0.0011162 | Down-regulated |
| NM_001449    | FHL1          | 2273   | 14.4775 | 14.7691 | 10.3949 | 8.32395 | -0.6092 | 7.15E-05  | 0.0004743 | Down-regulated |
| NM_007027    | nding protein | 11073  | 12.8417 | 13.5214 | 8.68967 | 8.42791 | -0.6094 | 2.12E-12  | 3.60E-11  | Down-regulated |
| NM_002641    | PIGA          | 5277   | 12.2828 | 11.3823 | 7.49371 | 7.78724 | -0.6095 | 1.16E-07  | 1.22E-06  | Down-regulated |
| NM_000633    | BCL2          | 596    | 2.60735 | 3.07176 | 1.72196 | 1.86696 | -0.6098 | 0.0011032 | 0.0055645 | Down-regulated |
| NM_001286635 | C6orf89       | 221477 | 5.59926 | 5.36892 | 3.22788 | 3.81728 | -0.6102 | 7.27E-06  | 5.89E-05  | Down-regulated |
| NM_003094    | SNRPE         | 6635   | 90.9043 | 81.6776 | 54.4897 | 57.3296 | -0.6121 | 2.53E-13  | 4.67E-12  | Down-regulated |
| NM_182692    | SRPK2         | 6733   | 25.1133 | 23.1748 | 15.165  | 16.1102 | -0.6122 | 1.31E-12  | 2.27E-11  | Down-regulated |
| NR_027166    | RRC75A-AS     | 125144 | 287.543 | 262.919 | 180.936 | 176.062 | -0.6124 | 7.39E-20  | 2.17E-18  | Down-regulated |
| NM_015944    | AMDHD2        | 51005  | 6.68403 | 6.37149 | 3.96533 | 3.99865 | -0.6125 | 0.0125883 | 0.0450169 | Down-regulated |
| NM_201286    | USP51         | 158880 | 2.43616 | 2.03987 | 1.30019 | 1.42698 | -0.6125 | 0.0138344 | 0.0486863 | Down-regulated |
| NM_017958    | PLEKHB2       | 55041  | 5.5916  | 3.83529 | 3.07504 | 2.75641 | -0.6127 | 0.0074718 | 0.028964  | Down-regulated |
| NM_001096    | ACLY          | 47     | 88.413  | 86.9535 | 58.6605 | 55.338  | -0.6131 | 6.38E-39  | 4.07E-37  | Down-regulated |
| NM_007085    | FSTL1         | 11167  | 15.7165 | 15.9416 | 9.83137 | 10.6267 | -0.6136 | 1.24E-10  | 1.82E-09  | Down-regulated |
| NM_001013836 | MAD1L1        | 8379   | 13.1792 | 11.8925 | 6.82396 | 9.04807 | -0.6136 | 0.000548  | 0.0029851 | Down-regulated |
| NM_024668    | ANKHD1        | 54882  | 7.20728 | 8.06641 | 5.08633 | 4.47157 | -0.6137 | 0.0022799 | 0.0103991 | Down-regulated |
| NM_001199954 | ACTG1         | 71     | 20.8823 | 19.0239 | 15.6754 | 8.73291 | -0.6148 | 0.011015  | 0.040188  | Down-regulated |
| NM_001126    | ADSS          | 159    | 33.4279 | 33.0245 | 21.1767 | 21.8143 | -0.6154 | 1.12E-16  | 2.65E-15  | Down-regulated |
| NM_033415    | ARMC6         | 93436  | 17.2598 | 20.7948 | 12.0639 | 12.2483 | -0.6167 | 8.88E-06  | 7.07E-05  | Down-regulated |
| NM_004558    | NRTN          | 4902   | 19.1414 | 20.2245 | 13.5978 | 11.0911 | -0.6167 | 0.0016977 | 0.0080813 | Down-regulated |

|              |            |        |         |         |          |          |         |           |           |                |
|--------------|------------|--------|---------|---------|----------|----------|---------|-----------|-----------|----------------|
| NM_0017839   | LPCAT2     | 54947  | 9.95808 | 9.59252 | 6.27181  | 6.33315  | -0.6168 | 1.96E-10  | 2.82E-09  | Down-regulated |
| NM_0006721   | ADK        | 132    | 12.246  | 13.7819 | 8.19084  | 8.36064  | -0.617  | 7.81E-05  | 0.0005143 | Down-regulated |
| NM_001145099 | SLC2A6     | 11182  | 7.9071  | 9.79507 | 5.99242  | 5.07649  | -0.6171 | 0.0022586 | 0.0103192 | Down-regulated |
| NM_001331040 | INPP4B     | 8821   | 16.6002 | 15.7879 | 11.2518  | 9.56603  | -0.6178 | 1.50E-08  | 1.74E-07  | Down-regulated |
| NM_001136204 | RCC2       | 55920  | 26.3342 | 27.2623 | 15.4248  | 18.9897  | -0.6183 | 3.49E-08  | 3.89E-07  | Down-regulated |
| NM_017826    | SOHLH2     | 54937  | 5.66182 | 4.9962  | 3.13702  | 3.38918  | -0.6188 | 0.0079739 | 0.0305878 | Down-regulated |
| NM_012393    | PFAS       | 5198   | 15.841  | 15.9027 | 10.5532  | 9.9168   | -0.6193 | 3.71E-15  | 7.97E-14  | Down-regulated |
| NM_201995    | SF1        | 7536   | 11.136  | 10.4325 | 5.78651  | 7.80411  | -0.6194 | 0.0005061 | 0.0027765 | Down-regulated |
| NM_182625    | GEN1       | 348654 | 2.26276 | 3.09838 | 1.45322  | 1.83344  | -0.6195 | 0.0078179 | 0.0300617 | Down-regulated |
| NM_0003384   | VRK1       | 7443   | 9.79606 | 9.90291 | 4.79815  | 7.14481  | -0.6198 | 0.0115161 | 0.0417057 | Down-regulated |
| NM_145886    | PIDD1      | 55367  | 10.415  | 9.46302 | 6.14199  | 6.50775  | -0.62   | 1.34E-05  | 0.0001028 | Down-regulated |
| NM_005496    | SMC4       | 10051  | 6.83622 | 6.20418 | 4.15553  | 4.17439  | -0.62   | 1.44E-06  | 1.30E-05  | Down-regulated |
| NM_181503    | EXOSC8     | 11340  | 22.2252 | 20.8884 | 13.4243  | 13.9422  | -0.6208 | 1.88E-05  | 0.0001398 | Down-regulated |
| NM_001363    | DKC1       | 1736   | 57.3525 | 53.9723 | 34.6853  | 37.0965  | -0.6211 | 4.79E-18  | 1.24E-16  | Down-regulated |
| NM_017793    | RPP25      | 54913  | 44.9905 | 43.6311 | 28.0495  | 29.0851  | -0.6211 | 1.40E-17  | 3.51E-16  | Down-regulated |
| NM_016507    | CDK12      | 51755  | 5.37865 | 4.16352 | 3.12254  | 2.91563  | -0.6215 | 0.0001148 | 0.0007303 | Down-regulated |
| NM_001001994 | GPM6B      | 2824   | 36.0986 | 34.2661 | 22.7366  | 22.6834  | -0.6217 | 1.05E-25  | 4.24E-24  | Down-regulated |
| NM_001032283 | TMPO       | 7112   | 16.9375 | 19.2358 | 11.4653  | 11.7493  | -0.6219 | 7.08E-10  | 9.53E-09  | Down-regulated |
| NM_000026    | ADSL       | 158    | 77.1869 | 76.6155 | 50.0709  | 49.1054  | -0.6219 | 1.27E-22  | 4.28E-21  | Down-regulated |
| NM_207370    | GPR153     | 387509 | 5.53761 | 6.38875 | 3.92734  | 3.59277  | -0.622  | 0.0001796 | 0.0010918 | Down-regulated |
| NM_004336    | BUB1       | 699    | 11.9765 | 11.9728 | 7.59517  | 7.75066  | -0.6224 | 7.40E-09  | 8.94E-08  | Down-regulated |
| NM_002882    | RANBP1     | 5902   | 74.5065 | 61.8806 | 41.6875  | 45.251   | -0.6226 | 1.03E-06  | 9.54E-06  | Down-regulated |
| NM_017566    | KLHDC4     | 54758  | 7.81947 | 7.3124  | 4.72897  | 4.62377  | -0.6248 | 0.0022843 | 0.0104142 | Down-regulated |
| NM_001193646 | ATF5       | 22809  | 13.6961 | 9.52373 | 6.86138  | 7.42193  | -0.625  | 0.0044242 | 0.0184207 | Down-regulated |
| NR_026757    | OIP5-AS1   | 729082 | 20.5888 | 19.1815 | 12.2523  | 13.0163  | -0.6255 | 1.18E-06  | 1.09E-05  | Down-regulated |
| NM_173555    | TYSDN1     | 219743 | 6.80164 | 8.25033 | 4.62535  | 4.86148  | -0.6256 | 0.0001346 | 0.000845  | Down-regulated |
| NM_001919    | ECI1       | 1632   | 60.699  | 55.8638 | 37.1488  | 37.1942  | -0.6259 | 9.63E-09  | 1.14E-07  | Down-regulated |
| NM_001193941 | RPL17      | 6139   | 87.9139 | 74.4349 | 47.9655  | 54.8105  | -0.6268 | 1.01E-05  | 7.93E-05  | Down-regulated |
| NM_014669    | NUP93      | 9688   | 47.4307 | 44.926  | 29.9289  | 29.4264  | -0.6268 | 1.90E-21  | 6.04E-20  | Down-regulated |
| NM_018290    | PGM2       | 55276  | 11.8013 | 11.0797 | 7.1573   | 7.40979  | -0.6269 | 3.05E-07  | 3.03E-06  | Down-regulated |
| NM_203314    | BDH1       | 622    | 2.5791  | 2.44522 | 1.43561  | 1.58168  | -0.6279 | 0.0131719 | 0.0467105 | Down-regulated |
| NR_024031    | DANCR      | 57291  | 45.3627 | 38.8609 | 25.4779  | 27.4761  | -0.628  | 0.0001236 | 0.0007807 | Down-regulated |
| NM_004805    | POLR2D     | 5433   | 14.7611 | 14.9016 | 9.57485  | 9.26144  | -0.6281 | 6.69E-07  | 6.36E-06  | Down-regulated |
| NM_006711    | RNPS1      | 10921  | 21.533  | 23.5902 | 13.2758  | 15.3736  | -0.6283 | 1.66E-06  | 1.49E-05  | Down-regulated |
| NM_001145971 | RDH13      | 112724 | 10.3814 | 12.2873 | 7.31435  | 6.83378  | -0.6286 | 0.0006101 | 0.0032882 | Down-regulated |
| NM_001827    | CKS2       | 1164   | 371.038 | 332.03  | 220.814  | 228.479  | -0.6287 | 6.89E-14  | 1.34E-12  | Down-regulated |
| NM_016466    | ANKRD39    | 51239  | 29.9804 | 32.204  | 20.4733  | 18.4303  | -0.6292 | 0.0002253 | 0.0013396 | Down-regulated |
| NM_013250    | ZNF215     | 7762   | 3.66925 | 3.28686 | 1.92907  | 2.31784  | -0.6297 | 0.005202  | 0.0212427 | Down-regulated |
| NM_001257144 | DDX11      | 1663   | 4.74691 | 3.42195 | 2.45908  | 2.51216  | -0.6297 | 0.0070487 | 0.0275307 | Down-regulated |
| NM_001324475 | INTS3      | 65123  | 7.63145 | 9.86333 | 6.06538  | 4.86505  | -0.63   | 0.0004289 | 0.002401  | Down-regulated |
| NM_005873    | RGS19      | 10287  | 19.5367 | 20.228  | 15.2627  | 8.61722  | -0.6312 | 0.0116689 | 0.0421391 | Down-regulated |
| NM_203372    | ACSL3      | 2181   | 30.6297 | 29.5314 | 18.8553  | 19.697   | -0.6313 | 1.04E-21  | 3.37E-20  | Down-regulated |
| NM_014824    | FCHSD2     | 9873   | 3.24288 | 3.27421 | 1.8346   | 2.18352  | -0.6315 | 0.0020436 | 0.0094798 | Down-regulated |
| NM_024096    | DCTPP1     | 79077  | 90.0367 | 95.4033 | 60.4726  | 57.9439  | -0.6316 | 2.35E-14  | 4.76E-13  | Down-regulated |
| NM_003035    | STIL       | 6491   | 2.927   | 2.77408 | 1.80347  | 1.73033  | -0.6324 | 0.0012876 | 0.0063837 | Down-regulated |
| NM_024622    | FASTKD1    | 79675  | 4.45931 | 4.14527 | 2.62689  | 2.74425  | -0.6327 | 0.000308  | 0.0017817 | Down-regulated |
| NM_001031709 | RNLS       | 55328  | 4.99484 | 4.27683 | 2.59327  | 2.98546  | -0.6328 | 0.0092589 | 0.0346747 | Down-regulated |
| NM_0052928   | SMYD4      | 114826 | 8.72386 | 8.80197 | 5.68759  | 5.4424   | -0.633  | 5.53E-08  | 6.02E-07  | Down-regulated |
| NM_001258295 | NFATC2     | 4773   | 18.3322 | 17.4338 | 11.7672  | 11.1044  | -0.6334 | 2.96E-19  | 8.36E-18  | Down-regulated |
| NM_001029858 | SLC35F1    | 222553 | 6.14241 | 6.25746 | 3.92018  | 3.9289   | -0.6335 | 1.18E-06  | 1.09E-05  | Down-regulated |
| NR_037656    | BLOC1S1    | 2647   | 50.5549 | 44.8972 | 31.9587  | 27.8842  | -0.6338 | 5.29E-05  | 0.0003613 | Down-regulated |
| NM_005381    | NCL        | 4691   | 331.064 | 328.103 | 208.576  | 214.137  | -0.634  | 3.80E-89  | 7.27E-87  | Down-regulated |
| NM_001101669 | INPP4B     | 8821   | 14.3995 | 15.3987 | 9.40575  | 9.63753  | -0.6348 | 1.75E-20  | 5.32E-19  | Down-regulated |
| NM_020850    | RANBP10    | 57610  | 21.1483 | 21.611  | 14.456   | 12.7815  | -0.6357 | 6.23E-14  | 1.21E-12  | Down-regulated |
| NM_006764    | IFRD2      | 7866   | 52.7963 | 52.8478 | 34.6283  | 32.803   | -0.6359 | 7.36E-19  | 2.00E-17  | Down-regulated |
| NM_015703    | RRP7A      | 27341  | 15.4173 | 14.4665 | 9.94263  | 9.06201  | -0.6363 | 2.77E-12  | 4.63E-11  | Down-regulated |
| NM_152388    | TMEM237    | 65062  | 1.68549 | 1.56141 | 1.0509   | 0.880085 | -0.6364 | 0.0126676 | 0.0452412 | Down-regulated |
| NM_005480    | TROAP      | 10024  | 8.13644 | 7.93145 | 5.08752  | 4.96569  | -0.6367 | 9.90E-05  | 0.0006381 | Down-regulated |
| NM_001143841 | TMEM106C   | 79022  | 13.548  | 13.6973 | 7.93744  | 8.94052  | -0.6372 | 0.0005368 | 0.0029295 | Down-regulated |
| NM_199440    | member 1(f | 3329   | 7.40518 | 10.2918 | 5.52798  | 5.24771  | -0.6376 | 0.003883  | 0.0165021 | Down-regulated |
| NR_046360    | FAM49B     | 51571  | 4.35094 | 4.29385 | 2.13076  | 3.11154  | -0.6382 | 0.0055    | 0.022255  | Down-regulated |
| NM_020702    | KIAA1161   | 57462  | 1.93056 | 2.26668 | 1.37351  | 1.18381  | -0.6382 | 0.0036442 | 0.0156333 | Down-regulated |
| NM_001243143 | NUSAP1     | 51203  | 6.77666 | 7.97009 | 3.74124  | 5.17631  | -0.6382 | 0.0057295 | 0.0230323 | Down-regulated |
| NM_207396    | RNF207     | 388591 | 3.2434  | 3.03443 | 1.93694  | 1.90744  | -0.6386 | 0.0026793 | 0.0119696 | Down-regulated |
| NM_145729    | MRPL24     | 79590  | 42.8584 | 40.8274 | 29.0158  | 23.1423  | -0.6388 | 0.000124  | 0.0007832 | Down-regulated |
| NM_015972    | POLR1D     | 51082  | 58.9965 | 52.8414 | 35.1732  | 35.0191  | -0.6393 | 3.85E-06  | 3.26E-05  | Down-regulated |
| NM_014285    | EXOSC2     | 23404  | 13.1655 | 11.2668 | 7.60265  | 7.59384  | -0.6394 | 0.0001455 | 0.0009071 | Down-regulated |
| NM_153485    | NUP155     | 9631   | 8.6617  | 9.63737 | 5.15173  | 6.31276  | -0.6402 | 1.53E-05  | 0.0001158 | Down-regulated |
| NM_032737    | LMNB2      | 84823  | 45.7662 | 45.3127 | 28.963   | 29.0798  | -0.6417 | 7.35E-40  | 4.81E-38  | Down-regulated |
| NM_130466    | UBE3B      | 89910  | 5.38439 | 5.71392 | 3.76211  | 3.18427  | -0.6423 | 1.27E-05  | 9.80E-05  | Down-regulated |
| NM_005984    | SLC25A1    | 6576   | 33.2247 | 30.9697 | 20.1198  | 20.4275  | -0.6425 | 1.94E-09  | 2.47E-08  | Down-regulated |
| NM_014569    | ZKSCAN5    | 23660  | 3.84253 | 3.92894 | 1.79576  | 2.82561  | -0.6426 | 0.0097552 | 0.0362208 | Down-regulated |
| NM_001146054 | SNCA       | 6622   | 15.7429 | 15.5433 | 11.0041  | 8.57357  | -0.6431 | 1.10E-05  | 8.60E-05  | Down-regulated |
| NM_003812    | ADAM23     | 8745   | 4.79288 | 4.7432  | 2.83913  | 3.14424  | -0.6439 | 2.67E-06  | 2.31E-05  | Down-regulated |
| NM_020803    | KLHL8      | 57563  | 3.78907 | 3.23041 | 2.49402  | 1.74906  | -0.6445 | 0.0042732 | 0.0178819 | Down-regulated |
| NM_001190    | BCAT2      | 587    | 25.102  | 27.0758 | 16.5128  | 16.2338  | -0.6447 | 1.80E-07  | 1.85E-06  | Down-regulated |
| NM_005956    | MTHFD1     | 4522   | 48.8939 | 50.8984 | 31.1141  | 32.2658  | -0.6448 | 2.87E-27  | 1.25E-25  | Down-regulated |
| NM_004095    | EIF4EBP1   | 1978   | 466.309 | 447.64  | 293.11   | 287.126  | -0.6451 | 1.13E-40  | 7.71E-39  | Down-regulated |
| NM_016343    | CENPF      | 1063   | 14.8949 | 15.0804 | 9.57646  | 9.4689   | -0.6452 | 4.74E-31  | 2.37E-29  | Down-regulated |
| NM_006527    | SLBP       | 7884   | 26.1633 | 25.0235 | 14.6184  | 17.5139  | -0.646  | 2.47E-07  | 2.49E-06  | Down-regulated |
| NM_152450    | FAM81A     | 145773 | 5.56838 | 5.29525 | 3.32884  | 3.39588  | -0.646  | 0.0001748 | 0.0010665 | Down-regulated |
| NM_018392    | ZGRF1      | 55345  | 1.17237 | 1.18543 | 0.713311 | 0.67457  | -0.6465 | 0.0128623 | 0.045791  | Down-regulated |
| NM_001143843 | TMEM106C   | 79022  | 22.9295 | 18.7446 | 13.2248  | 12.568   | -0.647  | 0.0001073 | 0.0006867 | Down-regulated |
| NM_018394    | ABHD10     | 55347  | 23.6096 | 21.4695 | 12.9526  | 15.3419  | -0.6472 | 1.78E-07  | 1.83E-06  | Down-regulated |

|              |               |        |         |         |          |         |         |           |           |                |
|--------------|---------------|--------|---------|---------|----------|---------|---------|-----------|-----------|----------------|
| NM_018482    | ASAP1         | 50807  | 14.7379 | 15.1151 | 10.3512  | 8.40214 | -0.6478 | 1.65E-08  | 1.91E-07  | Down-regulated |
| NM_024570    | RNASEH2B      | 79621  | 8.19907 | 7.29717 | 4.33658  | 4.938   | -0.6484 | 0.0056979 | 0.0229247 | Down-regulated |
| NR_103464    | member 14(F   | 51182  | 4.39394 | 4.21432 | 2.52732  | 2.80069 | -0.6484 | 0.0001015 | 0.0006531 | Down-regulated |
| NM_001206999 | CIT           | 11113  | 12.7342 | 13.7959 | 8.45808  | 8.31447 | -0.649  | 4.68E-18  | 1.22E-16  | Down-regulated |
| NM_004463    | FGD1          | 2245   | 5.69119 | 6.06696 | 3.75165  | 3.56359 | -0.6495 | 1.39E-05  | 0.0001062 | Down-regulated |
| NM_020382    | KMT5A         | 387893 | 25.4694 | 26.4031 | 16.5274  | 16.2036 | -0.65   | 3.40E-14  | 6.82E-13  | Down-regulated |
| NM_001143779 | IFT81         | 28981  | 5.46574 | 5.51519 | 3.28092  | 3.41623 | -0.6509 | 0.0009164 | 0.0047411 | Down-regulated |
| NM_002156    | ) member 1(F  | 3329   | 269.222 | 256.563 | 167.071  | 165.91  | -0.6512 | 2.44E-58  | 2.61E-56  | Down-regulated |
| NM_001193360 | EXD2          | 55218  | 4.83617 | 5.94132 | 3.73711  | 2.83255 | -0.6512 | 0.0011432 | 0.0057406 | Down-regulated |
| NM_018151    | RIF1          | 55183  | 3.69133 | 2.45539 | 1.81301  | 1.91117 | -0.6516 | 0.0021239 | 0.0097929 | Down-regulated |
| NM_001986    | ETV4          | 2118   | 75.8591 | 66.3421 | 42.9497  | 46.5501 | -0.652  | 5.46E-13  | 9.80E-12  | Down-regulated |
| NM_001317955 | ID1           | 3422   | 5.35585 | 7.10158 | 4.23971  | 3.18538 | -0.652  | 0.0060862 | 0.0242356 | Down-regulated |
| NM_003394    | WNT10B        | 7480   | 4.98941 | 4.6075  | 2.65412  | 3.04711 | -0.6531 | 0.005658  | 0.0228026 | Down-regulated |
| NM_024709    | C1orf115      | 79762  | 17.1748 | 17.6009 | 10.8891  | 10.9168 | -0.6543 | 6.79E-11  | 1.02E-09  | Down-regulated |
| NM_024308    | DHRS11        | 79154  | 15.3444 | 13.6181 | 9.17974  | 8.59627 | -0.656  | 0.0001578 | 0.0009743 | Down-regulated |
| NM_001184970 | PACSIN2       | 11252  | 41.7094 | 41.1604 | 27.5411  | 24.5482 | -0.6562 | 8.25E-17  | 1.97E-15  | Down-regulated |
| NM_000259    | MYO5A         | 4644   | 16.8643 | 20.2727 | 10.8174  | 12.4212 | -0.6563 | 1.08E-09  | 1.43E-08  | Down-regulated |
| NM_032319    | PRADC1        | 84279  | 14.4496 | 12.6761 | 7.91152  | 8.32637 | -0.6573 | 0.0028783 | 0.0127156 | Down-regulated |
| NM_001324366 | ADAL          | 161823 | 2.90463 | 2.13286 | 1.42315  | 1.52674 | -0.658  | 0.009943  | 0.0368204 | Down-regulated |
| NM_001130678 | EIF4E         | 1977   | 3.13009 | 2.69092 | 1.80899  | 1.792   | -0.6581 | 7.91E-06  | 6.35E-05  | Down-regulated |
| NM_001048223 | DBNDD2        | 55861  | 41.001  | 36.9589 | 23.8237  | 24.5993 | -0.6583 | 6.61E-07  | 6.30E-06  | Down-regulated |
| NM_021149    | COTL1         | 23406  | 212.174 | 204.096 | 133.176  | 128.972 | -0.6584 | 6.76E-47  | 5.56E-45  | Down-regulated |
| NM_007320    | RANBP3        | 8498   | 15.5312 | 10.311  | 7.71585  | 7.90806 | -0.659  | 0.00112   | 0.0056361 | Down-regulated |
| NM_002387    | MCC           | 4163   | 4.64538 | 4.71914 | 3.04497  | 2.78891 | -0.6593 | 2.89E-08  | 3.24E-07  | Down-regulated |
| NM_018136    | ASPM          | 259266 | 3.64978 | 3.89264 | 2.26694  | 2.43334 | -0.6593 | 1.64E-08  | 1.90E-07  | Down-regulated |
| NM_001008539 | SLC7A2        | 6542   | 4.18703 | 4.15203 | 2.65397  | 2.52666 | -0.6595 | 2.22E-07  | 2.25E-06  | Down-regulated |
| NM_022742    | CCDC136       | 64753  | 5.62741 | 6.02191 | 3.51174  | 3.67603 | -0.6599 | 1.30E-05  | 1.00E-04  | Down-regulated |
| NM_014783    | ARHGAP11A     | 9824   | 6.73639 | 6.32444 | 4.01595  | 4.10875 | -0.6599 | 2.00E-08  | 2.29E-07  | Down-regulated |
| NM_017858    | TIPIN         | 54962  | 10.7754 | 10.3717 | 6.78669  | 5.7525  | -0.6599 | 0.004575  | 0.0189703 | Down-regulated |
| NM_001171613 | PREPL         | 9581   | 4.00779 | 5.30533 | 3.25933  | 2.30988 | -0.66   | 0.0031846 | 0.0138447 | Down-regulated |
| NM_024296    | CCDC28B       | 79140  | 16.0174 | 14.443  | 9.52859  | 8.73697 | -0.6602 | 0.0020381 | 0.0094589 | Down-regulated |
| NM_182616    | ARPIN         | 348110 | 4.14818 | 3.9497  | 2.31486  | 2.67518 | -0.6608 | 2.99E-05  | 0.0002137 | Down-regulated |
| NM_000692    | ALDH1B1       | 219    | 15.6422 | 14.8737 | 9.34736  | 9.66574 | -0.6613 | 1.08E-09  | 1.42E-08  | Down-regulated |
| NM_178014    | TUBB          | 203068 | 609.207 | 578.316 | 372.158  | 374.831 | -0.6613 | 9.45E-71  | 1.34E-68  | Down-regulated |
| NM_001203245 | RPS10         | 6204   | 56.8496 | 46.8748 | 35.8018  | 26.8832 | -0.662  | 0.000791  | 0.0041588 | Down-regulated |
| NM_001100619 | CABLES1       | 91768  | 47.1155 | 46.9004 | 30.4951  | 28.5408 | -0.662  | 2.38E-33  | 1.29E-31  | Down-regulated |
| NM_001012509 | SLC45A2       | 51151  | 22.9788 | 23.4047 | 13.9135  | 15.0355 | -0.6626 | 4.22E-12  | 6.96E-11  | Down-regulated |
| NM_002383    | MAZ           | 4150   | 94.4248 | 100.216 | 63.6372  | 58.3405 | -0.6627 | 6.05E-23  | 2.09E-21  | Down-regulated |
| NM_004827    | lood group)(C | 9429   | 2.50663 | 2.31381 | 1.47192  | 1.39203 | -0.6629 | 0.0041669 | 0.0174883 | Down-regulated |
| NM_001018067 | SERBP1        | 26135  | 12.3528 | 12.723  | 7.28756  | 8.36709 | -0.6629 | 6.32E-12  | 1.03E-10  | Down-regulated |
| NM_001284389 | NOLC1         | 9221   | 28.3885 | 30.0099 | 19.8564  | 16.4954 | -0.6632 | 4.09E-10  | 5.67E-09  | Down-regulated |
| NM_004036    | ADCY3         | 109    | 17.5473 | 17.4088 | 11.8662  | 9.87164 | -0.6633 | 1.74E-09  | 2.23E-08  | Down-regulated |
| NM_001048195 | RCC1          | 1104   | 7.75151 | 7.55101 | 4.58297  | 4.79201 | -0.6642 | 9.84E-05  | 0.000635  | Down-regulated |
| NM_001162384 | ARHGEF2       | 9181   | 5.51847 | 3.86071 | 3.07858  | 2.47135 | -0.6644 | 0.0051745 | 0.0211349 | Down-regulated |
| NM_031266    | HNRNPAB       | 3182   | 220.364 | 215.796 | 133.481  | 140.063 | -0.6645 | 6.52E-48  | 5.58E-46  | Down-regulated |
| NM_031206    | LAS1L         | 81887  | 7.96733 | 6.59708 | 4.24485  | 4.56752 | -0.6646 | 0.0008626 | 0.0044959 | Down-regulated |
| NM_004295    | TRAF4         | 9618   | 77.2662 | 73.1827 | 47.8921  | 46.3595 | -0.6647 | 2.11E-31  | 1.07E-29  | Down-regulated |
| NM_006996    | SLC19A2       | 10560  | 11.4901 | 12.6652 | 6.90042  | 8.03136 | -0.665  | 7.26E-07  | 6.87E-06  | Down-regulated |
| NM_018086    | FIGN          | 55137  | 1.54962 | 1.98453 | 0.999369 | 1.0908  | -0.6653 | 0.0046214 | 0.0191459 | Down-regulated |
| NM_001025266 | C3orf70       | 285382 | 2.70587 | 2.33598 | 1.42464  | 1.59744 | -0.6655 | 0.0012977 | 0.0064267 | Down-regulated |
| NM_001105562 | UBE4B         | 10277  | 2.50314 | 2.6067  | 1.70296  | 1.35154 | -0.6656 | 0.001762  | 0.0083456 | Down-regulated |
| NM_001330762 | CNTRL         | 11064  | 4.07344 | 4.55752 | 2.22495  | 2.99049 | -0.6656 | 0.0005929 | 0.0032054 | Down-regulated |
| NM_006904    | PRKDC         | 5591   | 23.8081 | 26.6861 | 16.0554  | 15.5039 | -0.6668 | 2.25E-22  | 7.46E-21  | Down-regulated |
| NM_001202439 | NCR3LG1       | 374383 | 5.60527 | 7.16375 | 4.12538  | 3.6914  | -0.667  | 4.30E-05  | 0.0002974 | Down-regulated |
| NM_052966    | FAM129A       | 116496 | 5.61604 | 5.50839 | 3.61652  | 3.27297 | -0.667  | 3.26E-08  | 3.63E-07  | Down-regulated |
| NM_030569    | ITIH5         | 80760  | 60.7423 | 62.084  | 38.9634  | 37.9959 | -0.6671 | 3.24E-62  | 3.69E-60  | Down-regulated |
| NM_032346    | PDCD2L        | 84306  | 14.0815 | 14.3582 | 9.80038  | 6.80587 | -0.6671 | 0.0071207 | 0.0277663 | Down-regulated |
| NM_002861    | PCYT2         | 5833   | 12.8615 | 11.3476 | 6.81478  | 8.03846 | -0.6683 | 5.70E-06  | 4.71E-05  | Down-regulated |
| NM_033222    | PSIP1         | 11168  | 14.2534 | 15.7964 | 8.95277  | 9.6376  | -0.6699 | 7.79E-09  | 9.35E-08  | Down-regulated |
| NM_001289127 | TUBB4A        | 10382  | 96.6252 | 96.0206 | 62.4769  | 57.7527 | -0.67   | 9.33E-30  | 4.45E-28  | Down-regulated |
| NM_005380    | NBL1          | 4681   | 146.106 | 129.823 | 90.5965  | 81.0287 | -0.6702 | 9.10E-16  | 2.04E-14  | Down-regulated |
| NM_022092    | CHTF18        | 63922  | 21.0145 | 20.6887 | 13.5308  | 12.3468 | -0.6706 | 4.74E-12  | 7.78E-11  | Down-regulated |
| NM_001184998 | KIAA0430      | 9665   | 2.546   | 1.77942 | 1.3413   | 1.19643 | -0.6708 | 0.0046314 | 0.0191832 | Down-regulated |
| NM_001135245 | TCOF1         | 6949   | 11.4168 | 11.5153 | 6.6914   | 7.49394 | -0.6719 | 1.80E-10  | 2.60E-09  | Down-regulated |
| NM_024312    | GNPTAB        | 79158  | 49.8052 | 50.6798 | 30.9291  | 31.7924 | -0.672  | 6.52E-50  | 5.85E-48  | Down-regulated |
| NM_020754    | ARHGAP31      | 57514  | 11.9745 | 12.2837 | 7.40608  | 7.68667 | -0.6723 | 8.13E-21  | 2.52E-19  | Down-regulated |
| NM_003132    | SRM           | 6723   | 213.045 | 198.918 | 126.709  | 129.738 | -0.6729 | 1.05E-29  | 5.02E-28  | Down-regulated |
| NM_016111    | TELO2         | 9894   | 20.278  | 20.7515 | 13.0392  | 12.3981 | -0.673  | 3.87E-14  | 7.74E-13  | Down-regulated |
| NM_181705    | LYRM7         | 90624  | 2.90156 | 2.65219 | 1.54358  | 1.79895 | -0.6737 | 0.0003956 | 0.0022311 | Down-regulated |
| NM_022459    | XPO4          | 64328  | 4.55411 | 4.29509 | 2.72743  | 2.73771 | -0.6744 | 5.34E-10  | 7.27E-09  | Down-regulated |
| NM_033211    | C5orf30       | 90355  | 11.5349 | 12.4447 | 7.56933  | 7.17011 | -0.6746 | 1.36E-07  | 1.42E-06  | Down-regulated |
| NM_001301033 | SLC24A1       | 9187   | 2.78702 | 3.76284 | 1.99387  | 1.80707 | -0.6749 | 0.0064573 | 0.0255022 | Down-regulated |
| NM_014252    | SLC25A15      | 10166  | 6.23913 | 6.58631 | 4.08399  | 3.74976 | -0.6752 | 7.15E-06  | 5.80E-05  | Down-regulated |
| NM_000687    | AHCY          | 191    | 174.944 | 164.661 | 107.824  | 103.473 | -0.6752 | 7.47E-39  | 4.76E-37  | Down-regulated |
| NR_109973    | DLEU1         | 10301  | 5.62946 | 4.13723 | 3.23929  | 2.33885 | -0.6754 | 0.0104466 | 0.0384076 | Down-regulated |
| NM_001258294 | NFATC2        | 4773   | 20.9767 | 24.0639 | 14.1836  | 13.7126 | -0.6759 | 5.59E-15  | 1.18E-13  | Down-regulated |
| NM_001139488 | RASGRP3       | 25780  | 1.81394 | 1.71002 | 0.947494 | 1.07358 | -0.676  | 0.0093247 | 0.0349004 | Down-regulated |
| NM_018124    | RFWD3         | 55159  | 16.9382 | 17.6457 | 10.3489  | 11.0732 | -0.6762 | 2.92E-16  | 6.69E-15  | Down-regulated |
| NM_001330105 | CDC16         | 8881   | 6.01576 | 7.59887 | 4.71394  | 3.03592 | -0.6774 | 0.0118979 | 0.0428526 | Down-regulated |
| NM_001099645 | RPL22L1       | 200916 | 30.073  | 22.7523 | 15.0828  | 16.9267 | -0.6777 | 4.55E-05  | 0.000314  | Down-regulated |
| NM_002853    | RAD1          | 5810   | 5.33036 | 4.92532 | 2.83708  | 3.37018 | -0.6779 | 6.17E-05  | 0.0004145 | Down-regulated |
| NM_178562    | TSPAN33       | 340348 | 6.98199 | 6.59559 | 4.52321  | 3.55308 | -0.6788 | 0.0007461 | 0.0039512 | Down-regulated |
| NM_024546    | RNF219        | 79596  | 4.0128  | 3.90214 | 2.42814  | 2.27713 | -0.6812 | 0.0007916 | 0.0041596 | Down-regulated |
| NM_006347    | PPIH          | 10465  | 62.3784 | 63.6082 | 37.6267  | 39.4194 | -0.6816 | 4.05E-08  | 4.48E-07  | Down-regulated |



|              |                |        |          |          |          |          |         |           |           |                |
|--------------|----------------|--------|----------|----------|----------|----------|---------|-----------|-----------|----------------|
| NM_004341    | CAD            | 790    | 26.4364  | 23.9561  | 15.059   | 16.0636  | -0.6823 | 6.30E-20  | 1.86E-18  | Down-regulated |
| NM_001287442 | JADE1          | 79960  | 3.42968  | 2.46872  | 1.59785  | 1.84742  | -0.6824 | 0.003536  | 0.0152133 | Down-regulated |
| NM_0015954   | DERA           | 51071  | 34.2849  | 34.1723  | 21.2151  | 20.9312  | -0.6825 | 5.46E-13  | 9.80E-12  | Down-regulated |
| NR_134580    | BEST1          | 7439   | 4.19125  | 4.96058  | 2.76083  | 2.58878  | -0.6835 | 0.0023431 | 0.0106537 | Down-regulated |
| NM_194292    | SASS6          | 163786 | 2.63988  | 2.26495  | 1.41113  | 1.42591  | -0.6835 | 0.0055984 | 0.0226055 | Down-regulated |
| NM_000281    | PCBD1          | 5092   | 24.0614  | 24.9107  | 14.7283  | 14.6884  | -0.6839 | 5.92E-05  | 0.0003985 | Down-regulated |
| NM_001128217 | PSIP1          | 11168  | 8.19799  | 9.07628  | 5.30507  | 5.182    | -0.6845 | 2.19E-06  | 1.93E-05  | Down-regulated |
| NM_001012507 | CENPW          | 387103 | 14.1559  | 12.5087  | 7.31281  | 8.26607  | -0.6848 | 0.0025692 | 0.0115453 | Down-regulated |
| NM_002105    | H2AFX          | 3014   | 83.4068  | 85.6011  | 53.1291  | 51.1328  | -0.6849 | 2.43E-24  | 9.06E-23  | Down-regulated |
| NM_001271097 | splicing facto | 22827  | 5.65905  | 8.44472  | 4.10723  | 3.83966  | -0.6852 | 0.0121047 | 0.0435563 | Down-regulated |
| NM_001258429 | C20orf27       | 54976  | 46.4449  | 46.407   | 27.9566  | 29.0171  | -0.6854 | 8.21E-12  | 1.32E-10  | Down-regulated |
| NM_018706    | DHTKD1         | 55526  | 7.01515  | 7.19463  | 4.52858  | 4.13804  | -0.6857 | 3.07E-08  | 3.44E-07  | Down-regulated |
| NM_006946    | SPTBN2         | 6712   | 9.66375  | 9.79648  | 6.30009  | 5.65983  | -0.6859 | 6.19E-14  | 1.21E-12  | Down-regulated |
| NM_001163735 | MYO19          | 80179  | 16.4657  | 17.2722  | 10.0147  | 10.7184  | -0.6865 | 1.36E-14  | 2.80E-13  | Down-regulated |
| NM_032358    | CCDC77         | 84318  | 6.40949  | 4.85613  | 3.77517  | 2.51762  | -0.6869 | 0.013068  | 0.0463849 | Down-regulated |
| NM_001145658 | RAP1GAP        | 5909   | 2.84814  | 3.68456  | 2.02404  | 1.67005  | -0.688  | 0.0090334 | 0.0339492 | Down-regulated |
| NM_006375    | ENOX2          | 10495  | 5.27734  | 3.66438  | 2.53053  | 2.68564  | -0.6883 | 0.0028287 | 0.0125372 | Down-regulated |
| NM_004263    | SEMA4F         | 10505  | 5.63005  | 4.64252  | 2.93635  | 3.24681  | -0.6886 | 1.92E-05  | 0.0001424 | Down-regulated |
| NM_145697    | NUF2           | 83540  | 10.006   | 11.0723  | 5.54368  | 6.94024  | -0.6901 | 0.000476  | 0.0026368 | Down-regulated |
| NM_001286176 | C2CD5          | 9847   | 5.0667   | 9.02404  | 3.08446  | 4.7723   | -0.6911 | 0.0126944 | 0.0453113 | Down-regulated |
| NM_001318860 | DGUOK          | 1716   | 44.8536  | 40.413   | 24.3721  | 27.1704  | -0.6913 | 9.54E-07  | 8.87E-06  | Down-regulated |
| NM_001485    | GBX2           | 2637   | 5.89905  | 6.08771  | 3.19859  | 3.69364  | -0.6916 | 0.0054477 | 0.0220949 | Down-regulated |
| NM_015341    | NCAPH          | 23397  | 8.43474  | 6.18041  | 4.50401  | 4.24082  | -0.6919 | 6.33E-05  | 0.0004243 | Down-regulated |
| NM_007086    | WDHD1          | 11169  | 4.3955   | 4.80753  | 2.74984  | 2.80383  | -0.6923 | 1.40E-06  | 1.28E-05  | Down-regulated |
| NM_001905    | CTPS1          | 1503   | 25.8921  | 24.7202  | 15.1498  | 15.8485  | -0.6924 | 8.20E-17  | 1.96E-15  | Down-regulated |
| NM_194255    | SLC19A1        | 6573   | 15.1523  | 14.8129  | 8.89741  | 9.35096  | -0.6926 | 9.44E-10  | 1.25E-08  | Down-regulated |
| NM_001152    | SLC25A5        | 292    | 335.7    | 308.351  | 193.246  | 202.05   | -0.6929 | 2.78E-31  | 1.40E-29  | Down-regulated |
| NM_032750    | ABHD14B        | 84836  | 11.2131  | 8.20778  | 5.21944  | 6.15244  | -0.693  | 0.0012916 | 0.0064019 | Down-regulated |
| NM_001024946 | ASL            | 435    | 6.25928  | 6.72227  | 3.58053  | 3.94865  | -0.693  | 0.0019695 | 0.0091734 | Down-regulated |
| NM_001130914 | BTG3           | 10950  | 7.41147  | 6.07709  | 3.54076  | 4.11693  | -0.6931 | 0.0082519 | 0.0314897 | Down-regulated |
| NM_001242560 | MAP4K4         | 9448   | 1.29963  | 1.26369  | 0.780343 | 0.696958 | -0.6933 | 0.004099  | 0.0172776 | Down-regulated |
| NR_073599    | ZNF142         | 7701   | 2.5938   | 2.26868  | 1.71054  | 1.01297  | -0.6935 | 0.0106815 | 0.0391879 | Down-regulated |
| NM_015895    | GMNN           | 51053  | 21.6857  | 20.2424  | 13.9106  | 10.9733  | -0.6941 | 0.0002145 | 0.0012834 | Down-regulated |
| NR_125343    | SLC29A2        | 3177   | 2.87467  | 3.30426  | 1.74258  | 1.71157  | -0.6941 | 0.0130296 | 0.0462917 | Down-regulated |
| NM_030786    | SYNC           | 81493  | 5.96745  | 6.1656   | 3.41384  | 3.85624  | -0.6943 | 4.33E-05  | 0.0002997 | Down-regulated |
| NM_024729    | MYH14          | 79784  | 1.27042  | 1.74676  | 0.906322 | 0.790303 | -0.6945 | 0.0096059 | 0.0357368 | Down-regulated |
| NM_016824    | ADD3           | 120    | 3.10096  | 5.77488  | 2.29193  | 2.61838  | -0.6954 | 0.0137204 | 0.0483592 | Down-regulated |
| NM_152227    | SNX5           | 27131  | 14.0589  | 14.2669  | 6.97232  | 9.7656   | -0.6962 | 0.0002581 | 0.0015165 | Down-regulated |
| NM_001034833 | NHP2           | 55651  | 21.0596  | 19.517   | 12.209   | 11.0963  | -0.6963 | 0.0040367 | 0.0170679 | Down-regulated |
| NM_001018068 | SERBP1         | 26135  | 8.38489  | 8.01445  | 5.15433  | 4.82101  | -0.697  | 3.37E-12  | 5.59E-11  | Down-regulated |
| NM_001190787 | MCIDAS         | 345643 | 6.47725  | 5.66321  | 3.5484   | 3.4913   | -0.6972 | 0.0020776 | 0.0096211 | Down-regulated |
| NM_005163    | AKT1           | 207    | 6.74108  | 6.38196  | 4.75777  | 2.46972  | -0.6977 | 0.0134805 | 0.04765   | Down-regulated |
| NM_001013839 | EXOC7          | 23265  | 5.77951  | 7.56037  | 4.08348  | 3.85058  | -0.6978 | 8.24E-05  | 0.0005392 | Down-regulated |
| NM_002345    | LUM            | 4060   | 7.05853  | 8.4526   | 4.28048  | 4.75831  | -0.6982 | 0.0010382 | 0.005275  | Down-regulated |
| NM_184231    | NCKIPSD        | 51517  | 7.49774  | 5.39798  | 3.44516  | 4.00811  | -0.6983 | 0.0022629 | 0.0103338 | Down-regulated |
| NM_001605    | AARS           | 16     | 52.0501  | 50.7456  | 32.832   | 29.984   | -0.6985 | 1.60E-24  | 6.07E-23  | Down-regulated |
| NM_001284388 | NOLC1          | 9221   | 5.5343   | 4.16036  | 2.11543  | 3.34315  | -0.6985 | 0.0076186 | 0.029464  | Down-regulated |
| NM_001206866 | IL6R           | 3570   | 5.65312  | 5.34181  | 3.61528  | 2.50657  | -0.7015 | 0.00933   | 0.0349135 | Down-regulated |
| NM_080660    | ZC3HAV1L       | 92092  | 9.09326  | 9.36121  | 5.69477  | 5.11338  | -0.7017 | 0.0004947 | 0.0027258 | Down-regulated |
| NM_080626    | BRI3BP         | 140707 | 9.32789  | 9.7489   | 5.43842  | 5.42676  | -0.7018 | 0.0031285 | 0.0136227 | Down-regulated |
| NM_001320470 | BCAS3          | 54828  | 13.6026  | 12.1931  | 7.63229  | 7.94894  | -0.7023 | 1.76E-09  | 2.26E-08  | Down-regulated |
| NM_001048212 | CEMP1          | 752014 | 7.01608  | 6.26969  | 3.81484  | 3.51971  | -0.7024 | 0.0099384 | 0.0368153 | Down-regulated |
| NM_012322    | LSM5           | 23658  | 12.6239  | 12.3835  | 7.43901  | 7.56924  | -0.7026 | 8.33E-07  | 7.82E-06  | Down-regulated |
| NM_014825    | erevisiae)(UF  | 9875   | 7.21344  | 7.29355  | 4.28723  | 4.54146  | -0.7029 | 4.50E-18  | 1.17E-16  | Down-regulated |
| NM_003276    | TMPO           | 7112   | 16.4122  | 16.8842  | 9.39434  | 10.7384  | -0.7033 | 7.31E-11  | 1.09E-09  | Down-regulated |
| NM_002562    | P2RX7          | 5027   | 37.5285  | 38.0042  | 22.4088  | 23.594   | -0.7038 | 3.14E-28  | 1.42E-26  | Down-regulated |
| NM_005517    | HMGN2          | 3151   | 134.41   | 131.498  | 80.0225  | 82.0039  | -0.7055 | 9.30E-48  | 7.94E-46  | Down-regulated |
| NM_001278055 | SACS           | 26278  | 2.04994  | 2.00632  | 1.4274   | 0.930856 | -0.7061 | 0.0008342 | 0.0043599 | Down-regulated |
| NM_152573    | RASEF          | 158158 | 6.43679  | 6.73428  | 4.22112  | 3.67873  | -0.7064 | 1.19E-07  | 1.24E-06  | Down-regulated |
| NM_020455    | ADGRG6         | 57211  | 4.45422  | 6.56904  | 2.4059   | 3.83699  | -0.7065 | 0.0043375 | 0.0181073 | Down-regulated |
| NM_020187    | ES cell-spe    | 56941  | 13.4077  | 11.6019  | 7.62354  | 7.08092  | -0.7069 | 0.0002009 | 0.0012103 | Down-regulated |
| NM_017746    | TEX10          | 54881  | 13.8135  | 15.3643  | 8.89476  | 8.65926  | -0.7073 | 3.24E-09  | 4.05E-08  | Down-regulated |
| NM_006342    | TACC3          | 10460  | 26.1608  | 23.9317  | 15.4382  | 14.8462  | -0.7084 | 1.77E-13  | 3.32E-12  | Down-regulated |
| NM_016577    | RAB6B          | 51560  | 14.7687  | 15.224   | 9.49361  | 8.66278  | -0.7088 | 3.44E-16  | 7.86E-15  | Down-regulated |
| NM_145290    | ADGRA3         | 166647 | 13.3835  | 14.0915  | 8.22815  | 8.36868  | -0.7096 | 1.99E-14  | 4.05E-13  | Down-regulated |
| NM_012140    | SLC25A10       | 1468   | 8.65355  | 8.1618   | 4.85644  | 4.97138  | -0.7102 | 0.0002251 | 0.0013393 | Down-regulated |
| NM_015261    | NCAPD3         | 23310  | 9.98076  | 10.4433  | 6.13485  | 6.18325  | -0.7107 | 9.41E-14  | 1.81E-12  | Down-regulated |
| NM_001194955 | MATR3          | 9782   | 3.99013  | 2.38618  | 1.93005  | 1.57497  | -0.7108 | 0.0096061 | 0.0357368 | Down-regulated |
| NM_017669    | ERCC6L         | 54821  | 2.86432  | 3.23188  | 1.6735   | 1.83276  | -0.712  | 0.0011776 | 0.0058933 | Down-regulated |
| NM_020238    | INCENP         | 3619   | 7.31688  | 7.9718   | 4.07129  | 4.9907   | -0.7121 | 9.37E-06  | 7.42E-05  | Down-regulated |
| NM_001313959 | AFF1           | 4299   | 2.42065  | 3.53917  | 1.93237  | 1.47694  | -0.7123 | 0.001834  | 0.0086204 | Down-regulated |
| NM_006834    | RAB32          | 10981  | 62.9187  | 67.302   | 38.7369  | 39.7279  | -0.7124 | 4.82E-14  | 9.53E-13  | Down-regulated |
| NR_037688    | ACTG1          | 71     | 151.31   | 149.884  | 91.1906  | 91.3912  | -0.7131 | 7.08E-55  | 7.08E-53  | Down-regulated |
| NM_017770    | ELOVL2         | 54898  | 8.8971   | 8.37237  | 5.27425  | 5.05569  | -0.7133 | 1.67E-08  | 1.92E-07  | Down-regulated |
| NM_001033723 | ZNF704         | 619279 | 6.86479  | 7.36568  | 4.11317  | 4.47156  | -0.7144 | 1.56E-17  | 3.90E-16  | Down-regulated |
| NM_001345882 | DCAF16         | 54876  | 2.60936  | 3.00315  | 1.84807  | 1.27576  | -0.7144 | 0.0056864 | 0.022893  | Down-regulated |
| NM_001202438 | EDRF1          | 26098  | 2.27289  | 2.82101  | 1.50592  | 1.3782   | -0.7153 | 0.002845  | 0.0125947 | Down-regulated |
| NM_001278655 | LINC01272      | 1E+08  | 12.1279  | 10.7621  | 7.21696  | 6.17669  | -0.7157 | 8.41E-05  | 0.0005496 | Down-regulated |
| NM_032434    | ZNF512         | 84450  | 3.69724  | 3.30423  | 2.16635  | 1.82459  | -0.7169 | 0.0017496 | 0.0082994 | Down-regulated |
| NM_0000884   | IMPDH2         | 3615   | 169.838  | 164.194  | 96.825   | 104.839  | -0.7171 | 5.18E-33  | 2.76E-31  | Down-regulated |
| NM_182515    | ZNF714         | 148206 | 0.956857 | 1.00268  | 0.573684 | 0.518529 | -0.7176 | 0.0049229 | 0.0202199 | Down-regulated |
| NM_001203247 | EZH2           | 2146   | 12.9495  | 11.4732  | 7.0789   | 7.40125  | -0.7183 | 4.32E-07  | 4.21E-06  | Down-regulated |
| NM_031271    | TEX15          | 56154  | 0.733333 | 0.687511 | 0.433332 | 0.325633 | -0.7187 | 0.0133814 | 0.0473478 | Down-regulated |
| NM_018410    | HJURP          | 55355  | 13.7397  | 13.7165  | 7.55532  | 8.79598  | -0.719  | 1.44E-08  | 1.67E-07  | Down-regulated |

|              |           |         |          |          |          |          |         |           |           |                |
|--------------|-----------|---------|----------|----------|----------|----------|---------|-----------|-----------|----------------|
| NM_0015697   | COQ2      | 27235   | 11.1317  | 11.4955  | 5.91111  | 7.16204  | -0.719  | 0.0003425 | 0.0019606 | Down-regulated |
| NM_001195738 | FAM213B   | 127281  | 8.75703  | 12.6055  | 6.73893  | 5.47341  | -0.7191 | 0.0011185 | 0.0056313 | Down-regulated |
| NM_0015141   | GPD1L     | 23171   | 13.7583  | 11.8976  | 7.65241  | 7.65425  | -0.7192 | 2.11E-09  | 2.69E-08  | Down-regulated |
| NM_001330681 | TTC3      | 7267    | 34.2638  | 34.0554  | 17.908   | 22.9358  | -0.7194 | 9.15E-11  | 1.35E-09  | Down-regulated |
| NM_0004091   | GAB2      | 9846    | 25.5145  | 27.8538  | 16.0131  | 16.0624  | -0.7223 | 4.18E-25  | 1.63E-23  | Down-regulated |
| NM_001271420 | TTC19     | 54902   | 4.19885  | 4.04778  | 2.09873  | 2.61851  | -0.7226 | 0.0007783 | 0.0041058 | Down-regulated |
| NM_018204    | CKAP2     | 26586   | 7.79824  | 6.38871  | 3.54275  | 4.63409  | -0.7244 | 0.0002792 | 0.00163   | Down-regulated |
| NM_001300913 | C11orf24  | 53838   | 10.5121  | 9.07371  | 5.37035  | 5.38885  | -0.7244 | 0.006005  | 0.0239687 | Down-regulated |
| NM_001761    | CCNF      | 899     | 6.55462  | 7.17149  | 4.05688  | 4.04371  | -0.7255 | 2.91E-07  | 2.91E-06  | Down-regulated |
| NM_001826    | CKS1B     | 1163    | 213.637  | 193.819  | 119.867  | 123.644  | -0.7261 | 7.22E-19  | 1.96E-17  | Down-regulated |
| NM_001243750 | NUDT8     | 254552  | 20.4584  | 18.0755  | 9.08798  | 11.8316  | -0.7265 | 0.0066916 | 0.0262918 | Down-regulated |
| NM_080597    | OSBPL1A   | 114876  | 10.6939  | 10.2493  | 5.99821  | 6.44613  | -0.7267 | 1.73E-10  | 2.51E-09  | Down-regulated |
| NM_014290    | TDRD7     | 23424   | 18.8808  | 18.4444  | 10.6814  | 11.6009  | -0.7273 | 2.63E-15  | 5.73E-14  | Down-regulated |
| NM_001076684 | UBTF      | 7343    | 6.18131  | 10.3129  | 4.47762  | 4.82822  | -0.7274 | 0.0016303 | 0.0077993 | Down-regulated |
| NM_181471    | RFC2      | 5982    | 15.0553  | 15.9132  | 9.91413  | 8.12233  | -0.7276 | 2.62E-05  | 0.0001902 | Down-regulated |
| NM_016183    | MRT04     | 51154   | 33.1978  | 34.1384  | 20.347   | 19.8788  | -0.7277 | 1.09E-17  | 2.77E-16  | Down-regulated |
| NM_007294    | BRCA1     | 672     | 2.35189  | 2.57122  | 1.5723   | 1.25803  | -0.7282 | 0.0002828 | 0.0016478 | Down-regulated |
| NM_001278201 | SLC43A3   | 29015   | 6.74077  | 6.05111  | 3.81043  | 3.56988  | -0.7284 | 0.0001576 | 0.0009738 | Down-regulated |
| NM_030762    | BHLHE41   | 79365   | 22.6389  | 25.3618  | 14.5309  | 14.082   | -0.7287 | 5.15E-15  | 1.10E-13  | Down-regulated |
| NM_006306    | SMC1A     | 8243    | 12.7869  | 13.5185  | 7.69263  | 8.04514  | -0.729  | 8.64E-26  | 3.52E-24  | Down-regulated |
| NM_031432    | UCK1      | 83549   | 20.2808  | 19.2758  | 12.2572  | 11.1563  | -0.729  | 2.71E-09  | 3.43E-08  | Down-regulated |
| NM_004701    | CCNB2     | 9133    | 33.8314  | 32.9455  | 18.4342  | 21.0577  | -0.7293 | 1.84E-09  | 2.35E-08  | Down-regulated |
| NM_0012112   | TPX2      | 22974   | 44.9751  | 45.0635  | 26.8045  | 27.0974  | -0.73   | 2.25E-39  | 1.46E-37  | Down-regulated |
| NM_016123    | IRAK4     | 51135   | 2.09667  | 2.69124  | 1.18817  | 1.42551  | -0.73   | 0.0057958 | 0.0232258 | Down-regulated |
| NM_001317123 | AGO1      | 26523   | 11.7279  | 13.0503  | 7.00639  | 7.73789  | -0.7305 | 1.18E-13  | 2.24E-12  | Down-regulated |
| NM_001278166 | NBL1      | 4681    | 92.7267  | 109.149  | 62.4852  | 57.5062  | -0.7311 | 5.68E-14  | 1.12E-12  | Down-regulated |
| NM_001023570 | IQCB1     | 9657    | 5.86352  | 5.53502  | 3.19859  | 3.32552  | -0.7314 | 0.0002997 | 0.0017367 | Down-regulated |
| NM_152838    | RBM12     | 10137   | 2.4026   | 2.39309  | 1.58359  | 1.11879  | -0.7317 | 0.0014886 | 0.0072209 | Down-regulated |
| NM_006165    | NFRKB     | 4798    | 1.35742  | 1.97967  | 0.861682 | 0.897614 | -0.7318 | 0.0125469 | 0.0448855 | Down-regulated |
| NR_047571    | ANKFY1    | 51479   | 1.15404  | 1.58503  | 0.723063 | 0.770344 | -0.7319 | 0.0061732 | 0.0245323 | Down-regulated |
| NM_213649    | SFXN4     | 119559  | 11.7028  | 9.91683  | 5.42107  | 6.66089  | -0.7322 | 0.0019699 | 0.0091734 | Down-regulated |
| NM_024056    | TMEM106C  | 79022   | 17.5233  | 20.8163  | 11.0859  | 11.2272  | -0.7325 | 1.19E-05  | 9.23E-05  | Down-regulated |
| NM_020830    | WDFY1     | 57590   | 35.982   | 36.0368  | 21.1267  | 21.9139  | -0.7327 | 2.49E-38  | 1.55E-36  | Down-regulated |
| NM_001018055 | BRCC3     | 79184   | 9.95575  | 8.05481  | 4.21734  | 5.99043  | -0.7332 | 0.0008969 | 0.0046532 | Down-regulated |
| NM_001143842 | TMEM106C  | 79022   | 28.0822  | 27.1521  | 17.2988  | 15.1958  | -0.7337 | 1.43E-08  | 1.66E-07  | Down-regulated |
| NM_003662    | PIR       | 8544    | 19.8607  | 16.0701  | 10.8568  | 9.87826  | -0.7343 | 5.58E-05  | 0.0003787 | Down-regulated |
| NM_153045    | TMEM268   | 203197  | 5.55877  | 3.61466  | 2.69321  | 2.38679  | -0.7363 | 0.002614  | 0.0117189 | Down-regulated |
| NM_014829    | DDX46     | 9879    | 3.06467  | 4.13407  | 1.72717  | 2.29692  | -0.7383 | 0.0015521 | 0.0074815 | Down-regulated |
| NM_015721    | GEMIN4    | 50628   | 22.1992  | 21.5054  | 13.2455  | 12.6772  | -0.7385 | 1.77E-19  | 5.08E-18  | Down-regulated |
| NM_001247996 | ASAP1     | 50807   | 4.84388  | 4.97115  | 2.06388  | 3.42457  | -0.7402 | 0.0013279 | 0.0065562 | Down-regulated |
| NM_001330199 | SCUBE2    | 57758   | 1.7862   | 1.44618  | 0.886351 | 0.824579 | -0.7405 | 0.0093865 | 0.035082  | Down-regulated |
| NM_001136498 | CISD3     | 284106  | 33.4097  | 30.6569  | 18.4507  | 19.4197  | -0.7408 | 3.60E-16  | 8.21E-15  | Down-regulated |
| NM_002945    | RPA1      | 6117    | 48.3986  | 48.9958  | 28.9139  | 28.9346  | -0.7426 | 2.19E-50  | 1.99E-48  | Down-regulated |
| NM_018490    | LGR4      | 55366   | 6.33382  | 7.57985  | 4.09338  | 4.00329  | -0.7427 | 4.31E-07  | 4.20E-06  | Down-regulated |
| NM_006066    | AKR1A1    | 10327   | 15.6083  | 10.8322  | 7.70071  | 7.00177  | -0.7438 | 0.0015548 | 0.0074907 | Down-regulated |
| NM_198510    | ITIH6     | 347365  | 8.20925  | 8.36284  | 5.10144  | 4.61579  | -0.7439 | 5.33E-10  | 7.27E-09  | Down-regulated |
| NM_023004    | RTN4R     | 65078   | 7.7267   | 7.12844  | 3.77457  | 4.52931  | -0.7458 | 0.0009039 | 0.0046858 | Down-regulated |
| NR_132748    | MIR3142HG | 1.1E+08 | 19.5423  | 18.6974  | 10.2597  | 12.0297  | -0.7462 | 1.64E-08  | 1.89E-07  | Down-regulated |
| NM_006591    | POLD3     | 10714   | 3.62515  | 3.84892  | 1.80597  | 2.35148  | -0.7491 | 0.0010343 | 0.0052573 | Down-regulated |
| NM_005687    | FARSB     | 10056   | 24.9285  | 22.1559  | 13.7218  | 13.8319  | -0.7499 | 1.46E-11  | 2.31E-10  | Down-regulated |
| NM_017998    | C9orf40   | 55071   | 7.07118  | 6.92646  | 3.84124  | 4.09047  | -0.7502 | 0.0001122 | 0.0007154 | Down-regulated |
| NM_001122823 | GTF3C5    | 9328    | 4.31308  | 5.6084   | 2.47554  | 2.8963   | -0.7507 | 0.0034461 | 0.0148666 | Down-regulated |
| NM_005594    | NACA      | 4666    | 67.7685  | 70.3903  | 42.803   | 37.9989  | -0.7511 | 1.82E-12  | 3.11E-11  | Down-regulated |
| NM_030949    | PPP1R14C  | 81706   | 3.15213  | 4.21118  | 1.55579  | 2.17999  | -0.7532 | 0.0141848 | 0.0497759 | Down-regulated |
| NR_027793    | LINC00518 | 221718  | 20.7331  | 20.07    | 11.2324  | 12.6146  | -0.7533 | 8.19E-13  | 1.44E-11  | Down-regulated |
| NM_001297576 | PEA15     | 8682    | 2.45823  | 2.72602  | 1.11725  | 1.52041  | -0.7537 | 0.012448  | 0.0445734 | Down-regulated |
| NM_014675    | CROCC     | 9696    | 12.9908  | 14.6234  | 8.46487  | 7.66634  | -0.7546 | 1.10E-13  | 2.11E-12  | Down-regulated |
| NM_001257401 | CD63      | 967     | 85.9778  | 75.4566  | 48.9121  | 44.8745  | -0.7562 | 1.75E-10  | 2.53E-09  | Down-regulated |
| NM_016426    | GTSE1     | 51512   | 21.9349  | 20.2812  | 12.1216  | 12.5476  | -0.7563 | 7.56E-15  | 1.58E-13  | Down-regulated |
| NM_001141973 | ATP13A2   | 23400   | 42.4772  | 40.7562  | 23.5339  | 25.3155  | -0.7567 | 3.10E-30  | 1.50E-28  | Down-regulated |
| NM_001172438 | PEG10     | 23089   | 3.25412  | 2.66891  | 1.18308  | 1.99363  | -0.7569 | 0.0039151 | 0.016616  | Down-regulated |
| NM_001164280 | SLC37A4   | 2542    | 17.9832  | 11.4768  | 9.74326  | 5.7783   | -0.758  | 0.0060929 | 0.0242534 | Down-regulated |
| NM_000245    | MET       | 4233    | 2.55437  | 2.8956   | 1.31308  | 1.72879  | -0.7582 | 0.0003767 | 0.0021341 | Down-regulated |
| NM_012413    | QPCT      | 25797   | 93.0838  | 85.5794  | 50.096   | 54.382   | -0.7583 | 6.38E-21  | 1.98E-19  | Down-regulated |
| NM_181656    | C17orf58  | 284018  | 4.93381  | 4.43321  | 2.16126  | 2.62978  | -0.759  | 0.0114888 | 0.0416461 | Down-regulated |
| NM_001329451 | KANK2     | 25959   | 15.7612  | 14.9648  | 9.6416   | 8.21942  | -0.7595 | 1.32E-12  | 2.28E-11  | Down-regulated |
| NM_001010866 | TMEM201   | 199953  | 8.59435  | 7.78769  | 5.24778  | 4.08164  | -0.7602 | 1.08E-05  | 8.46E-05  | Down-regulated |
| NM_000565    | IL6R      | 3570    | 15.2687  | 16.0385  | 9.60879  | 8.65851  | -0.7608 | 1.08E-17  | 2.75E-16  | Down-regulated |
| NM_178833    | SLC9B2    | 133308  | 2.96023  | 2.68959  | 1.59273  | 1.43436  | -0.7612 | 0.0037806 | 0.0161311 | Down-regulated |
| NM_005808    | CTDSPL    | 10217   | 9.74615  | 9.66306  | 5.23286  | 5.99873  | -0.7616 | 8.88E-10  | 1.18E-08  | Down-regulated |
| NM_017613    | DONSON    | 29980   | 11.6599  | 11.3188  | 6.97918  | 6.21678  | -0.7616 | 3.23E-07  | 3.19E-06  | Down-regulated |
| NM_001318821 | PDDC1     | 347862  | 7.56096  | 5.12022  | 3.80162  | 3.20394  | -0.7621 | 0.0005916 | 0.0031994 | Down-regulated |
| NM_018988    | GFOD1     | 54438   | 2.80415  | 2.65008  | 1.61837  | 1.27394  | -0.7624 | 0.0046366 | 0.0192006 | Down-regulated |
| NM_152540    | SCFD2     | 152579  | 8.98483  | 10.6198  | 5.44217  | 5.77586  | -0.7625 | 1.21E-06  | 1.11E-05  | Down-regulated |
| NM_007317    | KIF22     | 3835    | 40.3362  | 38.2417  | 23.2409  | 22.5665  | -0.7628 | 3.59E-19  | 1.00E-17  | Down-regulated |
| NM_178040    | ERC1      | 23085   | 6.15463  | 5.75359  | 3.26952  | 3.63807  | -0.7629 | 1.99E-12  | 3.38E-11  | Down-regulated |
| NM_020700    | PPM1H     | 57460   | 2.37611  | 2.36903  | 1.24555  | 1.41024  | -0.7632 | 0.000148  | 0.000921  | Down-regulated |
| NM_206808    | CLYBL     | 171425  | 7.44653  | 7.20099  | 3.70051  | 4.11791  | -0.7637 | 0.0031911 | 0.0138699 | Down-regulated |
| NM_001077180 | METTL9    | 51108   | 51.909   | 52.6056  | 31.3522  | 29.7315  | -0.7639 | 6.93E-37  | 4.17E-35  | Down-regulated |
| NM_080669    | SLC46A1   | 113235  | 1.87763  | 1.85695  | 1.04146  | 1.02339  | -0.764  | 0.0003875 | 0.0021903 | Down-regulated |
| NM_052844    | WDR34     | 89891   | 42.0846  | 40.2049  | 25.3837  | 22.2907  | -0.7643 | 2.73E-13  | 5.04E-12  | Down-regulated |
| NM_145287    | ZNF519    | 162655  | 0.878811 | 0.848889 | 0.467497 | 0.402007 | -0.7652 | 0.0112871 | 0.0410316 | Down-regulated |
| NM_019555    | ARHGEF3   | 50650   | 4.96146  | 3.79472  | 1.76678  | 2.82414  | -0.7659 | 0.0052161 | 0.021291  | Down-regulated |
| NM_001271844 | TBC1D16   | 125058  | 24.1316  | 20.8452  | 13.7503  | 12.3689  | -0.766  | 9.62E-17  | 2.28E-15  | Down-regulated |

|              |                |        |         |         |          |          |         |           |           |                |
|--------------|----------------|--------|---------|---------|----------|----------|---------|-----------|-----------|----------------|
| NM_007194    | CHEK2          | 11200  | 5.48035 | 5.28235 | 2.67433  | 3.05954  | -0.7661 | 0.0028066 | 0.0124539 | Down-regulated |
| NM_001142495 | MYO5A          | 4644   | 13.8135 | 11.574  | 8.15839  | 6.4353   | -0.7664 | 6.97E-09  | 8.44E-08  | Down-regulated |
| NM_003885    | CDK5R1         | 8851   | 14.8636 | 14.4304 | 8.90545  | 8.05637  | -0.7664 | 3.60E-13  | 6.58E-12  | Down-regulated |
| NM_003456    | ZNF205         | 7755   | 4.31826 | 3.53532 | 2.22477  | 1.80713  | -0.7664 | 0.0089179 | 0.0335818 | Down-regulated |
| NM_003173    | SUV39H1        | 6839   | 9.34145 | 8.72325 | 5.19391  | 5.07425  | -0.7683 | 8.37E-07  | 7.85E-06  | Down-regulated |
| NM_015059    | TLN2           | 83660  | 1.39509 | 1.52994 | 0.83043  | 0.817062 | -0.7684 | 2.83E-05  | 0.0002036 | Down-regulated |
| NM_144570    | HN1L           | 90861  | 35.6267 | 36.3427 | 21.4363  | 20.4599  | -0.7687 | 1.33E-31  | 6.78E-30  | Down-regulated |
| NM_016647    | THEM6          | 51337  | 31.4355 | 31.7043 | 19.3915  | 17.1052  | -0.7699 | 4.14E-14  | 8.24E-13  | Down-regulated |
| NM_002894    | RBBP8          | 5932   | 10.8922 | 10.3468 | 6.01026  | 6.1706   | -0.7703 | 1.68E-09  | 2.17E-08  | Down-regulated |
| NM_138284    | IL17D          | 53342  | 4.57797 | 5.18032 | 2.48726  | 2.66446  | -0.7704 | 0.0041604 | 0.0174784 | Down-regulated |
| NM_001143761 | EIF5A          | 1984   | 50.1351 | 45.2607 | 25.5986  | 29.1095  | -0.7706 | 5.99E-10  | 8.12E-09  | Down-regulated |
| NM_017975    | ZWILCH         | 55055  | 15.0994 | 16.4747 | 9.90981  | 8.12783  | -0.7711 | 2.85E-08  | 3.21E-07  | Down-regulated |
| NM_030923    | TMEM163        | 81615  | 49.9898 | 48.9433 | 26.0256  | 31.0104  | -0.7713 | 7.91E-13  | 1.40E-11  | Down-regulated |
| NR_045557    | UR1I           | 8725   | 10.9451 | 9.1483  | 6.23338  | 5.11675  | -0.7714 | 5.92E-06  | 4.88E-05  | Down-regulated |
| NM_032435    | MLK4           | 84451  | 1.34829 | 1.37637 | 0.698142 | 0.740796 | -0.7731 | 0.0036685 | 0.015716  | Down-regulated |
| NM_024923    | NUP210         | 23225  | 1.30998 | 1.25597 | 0.748202 | 0.621383 | -0.7737 | 0.0025247 | 0.0113771 | Down-regulated |
| NM_152856    | RBM10          | 8241   | 6.75803 | 6.51272 | 3.4676   | 3.98994  | -0.774  | 1.09E-05  | 8.49E-05  | Down-regulated |
| NM_053064    | GNG2           | 54331  | 22.6003 | 20.0627 | 11.3377  | 13.1668  | -0.7744 | 1.16E-11  | 1.85E-10  | Down-regulated |
| NM_003502    | AXIN1          | 8312   | 3.20459 | 4.42492 | 2.26209  | 1.78124  | -0.7745 | 0.002751  | 0.0122325 | Down-regulated |
| NM_001267040 | JARID2         | 3720   | 10.2774 | 8.57534 | 5.60869  | 5.15229  | -0.7753 | 6.34E-09  | 7.72E-08  | Down-regulated |
| NM_001330449 | AMDHD2         | 51005  | 28.3901 | 26.9181 | 17.1906  | 14.1729  | -0.7757 | 1.60E-07  | 1.66E-06  | Down-regulated |
| NM_015055    | SWAP70         | 23075  | 40.8594 | 41.2864 | 23.6526  | 24.0026  | -0.7762 | 7.16E-52  | 6.84E-50  | Down-regulated |
| NM_013409    | FST            | 10468  | 3.12152 | 3.34249 | 1.58964  | 1.55517  | -0.7769 | 0.0130327 | 0.0462939 | Down-regulated |
| NM_001278640 | RANBP1         | 5902   | 43.4376 | 42.9302 | 27.4971  | 21.3088  | -0.7772 | 8.74E-07  | 8.19E-06  | Down-regulated |
| NM_019029    | CPVL           | 54504  | 4.92257 | 4.27039 | 2.66699  | 1.98054  | -0.7778 | 0.0086908 | 0.0328626 | Down-regulated |
| NM_020715    | PLEKHH1        | 57475  | 5.87652 | 6.86352 | 3.51503  | 3.74072  | -0.778  | 1.01E-08  | 1.19E-07  | Down-regulated |
| NM_001321484 | RPS19          | 6223   | 43.901  | 31.1951 | 21.5675  | 18.3789  | -0.7782 | 0.0018375 | 0.0086329 | Down-regulated |
| NM_001330645 | ADGRL2         | 23266  | 2.52442 | 1.48644 | 1.19892  | 0.750712 | -0.7791 | 0.01339   | 0.0473661 | Down-regulated |
| NM_022909    | CENPH          | 64946  | 21.906  | 22.9312 | 12.2815  | 13.1264  | -0.7791 | 1.48E-07  | 1.54E-06  | Down-regulated |
| NM_001127218 | POLD2          | 5425   | 23.2888 | 23.8123 | 14.4339  | 12.3578  | -0.7792 | 8.21E-09  | 9.82E-08  | Down-regulated |
| NM_006082    | TUBA1B         | 10376  | 801.382 | 731.547 | 439.254  | 447.727  | -0.7792 | 7.09E-51  | 6.58E-49  | Down-regulated |
| NM_022089    | ATP13A2        | 23400  | 50.1704 | 48.3055 | 29.4753  | 27.4442  | -0.7793 | 1.05E-35  | 6.04E-34  | Down-regulated |
| NM_001288754 | RHOT1          | 55288  | 3.28689 | 3.52411 | 1.89615  | 1.77103  | -0.7796 | 0.0009531 | 0.0048996 | Down-regulated |
| NM_001008393 | C4orf46        | 201725 | 4.2135  | 4.2512  | 2.52064  | 2.13003  | -0.78   | 0.0001883 | 0.0011395 | Down-regulated |
| NM_005505    | SCARB1         | 949    | 182.104 | 178.762 | 107.882  | 100.897  | -0.7804 | 6.39E-60  | 6.98E-58  | Down-regulated |
| NM_001067    | ii alpha(TC    | 7153   | 33.108  | 32.0627 | 17.1798  | 20.2543  | -0.7822 | 1.20E-18  | 3.21E-17  | Down-regulated |
| NM_001361    | inone)(DHOI    | 1723   | 6.98664 | 7.52504 | 3.87322  | 4.16509  | -0.7827 | 4.02E-05  | 0.0002806 | Down-regulated |
| NM_001243733 | VEGFB          | 7423   | 4.77974 | 5.24011 | 2.84829  | 2.20847  | -0.7833 | 0.006679  | 0.0262489 | Down-regulated |
| NM_024330    | SLC27A3        | 11000  | 93.4043 | 90.4384 | 53.2982  | 52.7407  | -0.7842 | 6.83E-51  | 6.37E-49  | Down-regulated |
| NM_207123    | GAB1           | 2549   | 1.97038 | 2.06515 | 0.932771 | 1.25666  | -0.7847 | 0.000389  | 0.0021983 | Down-regulated |
| NM_017760    | NCAPG2         | 54892  | 13.429  | 13.3521 | 8.22521  | 7.03559  | -0.7847 | 2.99E-11  | 4.61E-10  | Down-regulated |
| NR_034123    | CKMT2-AS1      | 1E+08  | 3.36615 | 3.53796 | 1.73322  | 1.76517  | -0.7848 | 0.0066782 | 0.0262489 | Down-regulated |
| NM_001319228 | CEP131         | 22994  | 11.7178 | 10.9074 | 6.13864  | 6.72425  | -0.7862 | 2.40E-10  | 3.43E-09  | Down-regulated |
| NM_001271142 | ST3GAL6        | 10402  | 11.2141 | 11.8837 | 6.92576  | 6.17345  | -0.7869 | 1.13E-09  | 1.49E-08  | Down-regulated |
| NM_000248    | MITF           | 4286   | 27.5848 | 27.1281 | 15.6645  | 15.7775  | -0.7872 | 2.16E-34  | 1.19E-32  | Down-regulated |
| NM_199329    | SLC43A3        | 29015  | 64.1935 | 64.6207 | 38.1649  | 35.8987  | -0.7873 | 4.10E-37  | 2.48E-35  | Down-regulated |
| NM_001303130 | GAS2L3         | 283431 | 8.25091 | 8.92242 | 5.67359  | 3.82138  | -0.7877 | 3.37E-05  | 0.0002389 | Down-regulated |
| NM_001809    | CENPA          | 1058   | 17.6632 | 15.9303 | 7.9509   | 10.4865  | -0.7881 | 0.0001226 | 0.0007756 | Down-regulated |
| NM_138285    | NUP35          | 129401 | 10.4768 | 10.7193 | 5.93529  | 5.73242  | -0.7893 | 4.89E-05  | 0.0003356 | Down-regulated |
| NM_000550    | TYRP1          | 7306   | 140.661 | 138.508 | 76.2279  | 83.9891  | -0.7903 | 1.09E-41  | 7.72E-40  | Down-regulated |
| NM_175849    | DNMT3B         | 1789   | 2.47661 | 2.46178 | 1.15713  | 1.4455   | -0.7911 | 0.0018278 | 0.0086042 | Down-regulated |
| NM_173814    | PRTG           | 283659 | 1.0612  | 1.26422 | 0.630299 | 0.660881 | -0.7915 | 0.0002421 | 0.00143   | Down-regulated |
| NM_001144755 | MYBL1          | 4603   | 2.26662 | 2.19423 | 1.26818  | 1.12509  | -0.7916 | 0.0006314 | 0.0033946 | Down-regulated |
| NR_134882    | CNPY3          | 10695  | 3.53353 | 5.41976 | 2.08217  | 2.18012  | -0.7917 | 0.0129159 | 0.0459562 | Down-regulated |
| NM_033417    | HAUS8          | 93323  | 18.2569 | 17.7821 | 10.1288  | 9.99584  | -0.7921 | 5.15E-07  | 4.98E-06  | Down-regulated |
| NM_001317956 | ID1I           | 3422   | 3.97779 | 3.48484 | 2.12912  | 1.85999  | -0.7921 | 0.0009542 | 0.0049039 | Down-regulated |
| NM_001168    | BIRC5          | 332    | 26.7818 | 28.2122 | 15.8183  | 15.5305  | -0.7921 | 1.49E-18  | 3.98E-17  | Down-regulated |
| NM_001006946 | SDC1           | 6382   | 3.88321 | 5.65766 | 2.80971  | 2.16159  | -0.7932 | 0.0026391 | 0.0118147 | Down-regulated |
| NM_001324172 | WDR59          | 79726  | 5.57368 | 5.25158 | 2.99559  | 2.44785  | -0.7938 | 0.0049425 | 0.0202869 | Down-regulated |
| NM_0011120   | MFS10          | 10227  | 17.5391 | 20.125  | 9.91209  | 11.1874  | -0.7939 | 1.44E-07  | 1.50E-06  | Down-regulated |
| NM_017816    | LYAR           | 55646  | 25.8292 | 23.3712 | 14.699   | 12.8893  | -0.7942 | 5.00E-08  | 5.48E-07  | Down-regulated |
| NM_030918    | SNX27          | 81609  | 1.65327 | 1.99086 | 1.17698  | 0.582536 | -0.795  | 0.0107754 | 0.0394719 | Down-regulated |
| NM_018087    | NDC1           | 55706  | 13.1386 | 13.4125 | 7.3554   | 7.75078  | -0.7958 | 5.74E-18  | 1.48E-16  | Down-regulated |
| NM_006579    | ol isomerase)( | 10682  | 84.9724 | 87.9799 | 48.9357  | 49.5082  | -0.7959 | 1.13E-22  | 3.82E-21  | Down-regulated |
| NM_001308147 | PLEKHG3        | 26030  | 8.89886 | 9.66884 | 5.10376  | 5.38642  | -0.7963 | 2.93E-11  | 4.52E-10  | Down-regulated |
| NM_001113407 | LDB1           | 8861   | 10.4764 | 5.14084 | 2.8952   | 4.6595   | -0.7968 | 0.0097664 | 0.0362482 | Down-regulated |
| NM_016359    | NUSAP1         | 51203  | 8.93876 | 8.07376 | 5.61519  | 3.10916  | -0.7972 | 0.0033569 | 0.0145311 | Down-regulated |
| NM_003045    | SLC7A1         | 6541   | 19.6737 | 20.7246 | 11.4241  | 11.6399  | -0.7975 | 9.06E-36  | 5.21E-34  | Down-regulated |
| NM_012334    | MYO10          | 4651   | 25.1956 | 25.9809 | 14.7201  | 14.5443  | -0.7977 | 4.81E-68  | 6.47E-66  | Down-regulated |
| NM_018455    | CENPN          | 55839  | 23.8539 | 22.7413 | 12.9869  | 13.1343  | -0.7978 | 9.53E-09  | 1.13E-07  | Down-regulated |
| NM_012346    | NUP62          | 23636  | 2.88427 | 1.73112 | 0.981054 | 1.16087  | -0.7989 | 0.0138199 | 0.0486472 | Down-regulated |
| NM_001199263 | UCHL5          | 51377  | 15.8807 | 11.6256 | 6.74083  | 7.93257  | -0.7993 | 0.000567  | 0.0030806 | Down-regulated |
| NM_007280    | OIP5           | 11339  | 9.52849 | 9.27772 | 5.57575  | 4.08627  | -0.7996 | 0.0030028 | 0.0131743 | Down-regulated |
| NM_000337    | SGCD           | 6444   | 2.10478 | 2.70566 | 1.34198  | 1.29976  | -0.8    | 2.46E-05  | 0.0001792 | Down-regulated |
| NM_002691    | POLD1          | 5424   | 18.0551 | 16.7171 | 10.0947  | 9.57622  | -0.8006 | 5.47E-15  | 1.16E-13  | Down-regulated |
| NM_001130963 | NEMP1          | 23306  | 9.74552 | 9.77039 | 5.21213  | 5.81271  | -0.8009 | 5.96E-14  | 1.17E-12  | Down-regulated |
| NR_034069    | SRPK1          | 6732   | 3.74461 | 3.59414 | 1.38292  | 2.3781   | -0.8009 | 0.0032341 | 0.0140441 | Down-regulated |
| NM_001044369 | FAM69C         | 125704 | 2.73719 | 3.14419 | 1.41049  | 1.40401  | -0.8011 | 0.0103522 | 0.0381338 | Down-regulated |
| NM_001584    | MPPED2         | 744    | 5.75079 | 5.05423 | 2.84653  | 2.92846  | -0.8018 | 0.0003748 | 0.0021242 | Down-regulated |
| NM_001256240 | PGAP2          | 27315  | 5.05282 | 3.40659 | 2.19532  | 1.77379  | -0.802  | 0.0121295 | 0.043621  | Down-regulated |
| NM_001278376 | MPP2           | 4355   | 6.87595 | 5.80297 | 3.74215  | 3.23776  | -0.8029 | 3.98E-06  | 3.36E-05  | Down-regulated |
| NM_001146015 | DLGAP5         | 9787   | 3.45482 | 3.1877  | 1.95093  | 1.47864  | -0.8044 | 0.0023491 | 0.0106765 | Down-regulated |
| NM_017679    | BCAS3          | 54828  | 36.4789 | 32.9036 | 19.4726  | 19.7861  | -0.806  | 2.06E-23  | 7.28E-22  | Down-regulated |
| NM_000166    | GJB1           | 2705   | 297.084 | 287.797 | 171.041  | 161.039  | -0.8068 | 2.42E-62  | 2.81E-60  | Down-regulated |

|              |                |        |          |          |           |            |         |           |           |                |
|--------------|----------------|--------|----------|----------|-----------|------------|---------|-----------|-----------|----------------|
| NM_012291    | ESPL1          | 9700   | 10.0639  | 9.73702  | 5.95719   | 5.14855    | -0.8094 | 7.45E-14  | 1.44E-12  | Down-regulated |
| NM_000947    | ) subunit 2(P1 | 5558   | 7.42968  | 6.03888  | 3.78003   | 3.37361    | -0.8098 | 0.0003202 | 0.0018446 | Down-regulated |
| NM_000922    | PDE3B          | 5140   | 5.02854  | 4.88782  | 2.91511   | 2.58474    | -0.8133 | 1.26E-08  | 1.48E-07  | Down-regulated |
| NM_138444    | KCTD12         | 115207 | 2.5127   | 2.3042   | 1.38286   | 1.20756    | -0.8136 | 7.47E-05  | 0.0004936 | Down-regulated |
| NM_003223    | TFAP4          | 7023   | 14.5175  | 14.0302  | 7.98401   | 7.7807     | -0.8153 | 6.85E-09  | 8.30E-08  | Down-regulated |
| NM_001258376 | EPS15L1        | 58513  | 3.88305  | 4.17102  | 1.87557   | 2.39193    | -0.8161 | 0.0003292 | 0.0018925 | Down-regulated |
| NM_001135821 | FDPS           | 2224   | 14.1358  | 21.5474  | 8.97779   | 9.75005    | -0.8168 | 0.0005245 | 0.0028685 | Down-regulated |
| NM_001330564 | ZC3H13         | 23091  | 20.7575  | 21.5603  | 11.7637   | 12.0806    | -0.817  | 4.06E-44  | 3.07E-42  | Down-regulated |
| NM_014431    | PALD1          | 27143  | 4.26276  | 3.81709  | 1.94857   | 2.40043    | -0.8177 | 4.63E-05  | 0.0003185 | Down-regulated |
| NM_016025    | METTL9         | 51108  | 130.703  | 123.915  | 70.4449   | 73.089     | -0.8177 | 1.46E-63  | 1.79E-61  | Down-regulated |
| NM_014750    | DLGAP5         | 9787   | 9.34326  | 10.0557  | 5.32114   | 5.38945    | -0.8179 | 1.58E-08  | 1.83E-07  | Down-regulated |
| NM_033301    | RPL8           | 6132   | 140.788  | 148.358  | 86.3603   | 75.2661    | -0.8179 | 2.60E-18  | 6.84E-17  | Down-regulated |
| NM_007111    | TFDP1          | 7027   | 49.8516  | 46.7878  | 27.1747   | 27.1135    | -0.8179 | 9.81E-31  | 4.82E-29  | Down-regulated |
| NM_018140    | CEP72          | 55722  | 2.23019  | 2.68726  | 1.24485   | 1.03531    | -0.8189 | 0.010351  | 0.0381338 | Down-regulated |
| NM_145725    | TRAF3          | 7187   | 5.21925  | 5.52723  | 3.12109   | 2.84528    | -0.819  | 1.21E-11  | 1.93E-10  | Down-regulated |
| NM_014708    | KNTC1          | 9735   | 4.40561  | 4.19513  | 2.26599   | 2.48172    | -0.8193 | 4.82E-09  | 5.95E-08  | Down-regulated |
| NM_000376    | vitamin D3)    | 7421   | 4.43184  | 5.41539  | 2.85275   | 2.46631    | -0.8195 | 1.81E-05  | 0.0001354 | Down-regulated |
| NM_001143688 | DIS3L          | 115752 | 3.10061  | 3.27718  | 2.00075   | 0.810409   | -0.8214 | 0.0139392 | 0.0489948 | Down-regulated |
| NM_007109    | TCF19          | 6941   | 3.07842  | 3.97479  | 1.3971    | 2.09649    | -0.8215 | 0.0038544 | 0.0164024 | Down-regulated |
| NM_001130924 | TMEM201        | 199953 | 4.7471   | 5.22055  | 2.67773   | 2.72481    | -0.8228 | 4.32E-06  | 3.64E-05  | Down-regulated |
| NM_012145    | DTYMK          | 1841   | 58.7473  | 60.1594  | 34.3661   | 31.7341    | -0.8238 | 2.11E-16  | 4.89E-15  | Down-regulated |
| NM_001318151 | MRPL40         | 64976  | 9.31788  | 7.67949  | 4.41992   | 3.71236    | -0.824  | 0.0060581 | 0.0241452 | Down-regulated |
| NM_017785    | SPDL1          | 54908  | 9.18836  | 10.662   | 5.10954   | 5.66917    | -0.8244 | 1.15E-06  | 1.06E-05  | Down-regulated |
| NM_175085    | GART           | 2618   | 9.33653  | 11.8242  | 4.85354   | 6.29162    | -0.8245 | 0.0001522 | 0.0009442 | Down-regulated |
| NM_018131    | CEP55          | 55165  | 15.3457  | 15.2532  | 9.31501   | 7.40947    | -0.8259 | 5.65E-08  | 6.15E-07  | Down-regulated |
| NM_000405    | GM2A           | 2760   | 45.2186  | 47.4443  | 25.1591   | 26.6315    | -0.8269 | 7.71E-37  | 4.62E-35  | Down-regulated |
| NM_138477    | CDAN1          | 146059 | 2.5947   | 2.7171   | 1.32103   | 1.46362    | -0.8291 | 0.0001693 | 0.001036  | Down-regulated |
| NM_001105538 | MYBBP1A        | 10514  | 4.67747  | 5.69023  | 3.38323   | 1.16373    | -0.8294 | 0.0131814 | 0.0467354 | Down-regulated |
| NM_005108    | XYLB           | 9942   | 9.60065  | 10.7828  | 5.64293   | 5.54349    | -0.8306 | 5.27E-10  | 7.20E-09  | Down-regulated |
| NM_024955    | FOXRED2        | 80020  | 8.20675  | 7.72087  | 4.34948   | 4.43489    | -0.8312 | 2.99E-12  | 4.98E-11  | Down-regulated |
| NM_002263    | KIFC1          | 3833   | 23.079   | 22.8233  | 12.5495   | 12.8861    | -0.8314 | 1.12E-18  | 3.02E-17  | Down-regulated |
| NM_001144942 | RAB34          | 83871  | 6.78267  | 9.63361  | 4.69951   | 3.40501    | -0.8316 | 0.0028802 | 0.0127182 | Down-regulated |
| NM_148907    | OSBPL9         | 114883 | 9.35555  | 9.09601  | 5.18509   | 4.932      | -0.832  | 5.70E-10  | 7.74E-09  | Down-regulated |
| NM_001255    | CDC20          | 991    | 45.6751  | 46.4283  | 25.4476   | 25.6238    | -0.8325 | 1.43E-21  | 4.60E-20  | Down-regulated |
| NM_001005360 | DNM2           | 1785   | 12.3635  | 9.62429  | 6.82342   | 4.8242     | -0.833  | 5.32E-05  | 0.0003629 | Down-regulated |
| NM_006845    | KIF2C          | 11004  | 24.7852  | 25.4298  | 15.14     | 12.4727    | -0.8338 | 2.98E-12  | 4.96E-11  | Down-regulated |
| NM_032485    | MCM8           | 84515  | 2.62489  | 1.60201  | 1.10637   | 0.762398   | -0.835  | 0.0112138 | 0.040804  | Down-regulated |
| NM_206909    | PSD3           | 23362  | 0.615361 | 0.485923 | 0.0805981 | 0.00037972 | -0.8357 | 0.0103045 | 0.0380091 | Down-regulated |
| NM_012228    | MSRB2          | 22921  | 35.3826  | 34.191   | 18.9647   | 19.4692    | -0.8357 | 1.36E-17  | 3.42E-16  | Down-regulated |
| NM_003896    | ST3GAL5        | 8869   | 19.8051  | 20.9727  | 11.155    | 11.262     | -0.8364 | 6.76E-14  | 1.31E-12  | Down-regulated |
| NM_002417    | MKI67          | 4288   | 3.06822  | 3.63726  | 2.12588   | 1.41585    | -0.8365 | 4.57E-05  | 0.0003152 | Down-regulated |
| NM_001308114 | NFYC           | 4802   | 3.16376  | 4.63788  | 1.48669   | 2.06504    | -0.8377 | 0.0081364 | 0.0311298 | Down-regulated |
| NM_002539    | ODC1           | 4953   | 49.9737  | 44.5148  | 26.4729   | 25.6756    | -0.8381 | 1.67E-20  | 5.10E-19  | Down-regulated |
| NM_019605    | SERTAD4        | 56256  | 2.79127  | 2.59977  | 1.20423   | 1.2185     | -0.8389 | 0.0094333 | 0.0352241 | Down-regulated |
| NM_172229    | KREMEN2        | 79412  | 4.93721  | 3.899    | 2.14259   | 2.20606    | -0.8393 | 0.0025868 | 0.0116131 | Down-regulated |
| NM_018365    | MNS1           | 55329  | 6.12231  | 5.44092  | 2.65292   | 3.23133    | -0.8393 | 0.0007869 | 0.0041421 | Down-regulated |
| NM_133178    | PTPRN          | 10076  | 1.13758  | 1.19254  | 0.588379  | 0.524743   | -0.8393 | 0.0042377 | 0.0177485 | Down-regulated |
| NM_024678    | itative)(NAR'  | 79731  | 33.0089  | 33.2228  | 17.7422   | 18.8163    | -0.8397 | 1.61E-23  | 5.77E-22  | Down-regulated |
| NM_001324320 | MAST2          | 23139  | 1.37018  | 2.60485  | 0.640714  | 1.0899     | -0.84   | 0.0116683 | 0.0421391 | Down-regulated |
| NM_018304    | PRR11          | 55771  | 15.0349  | 14.9919  | 8.07355   | 8.52048    | -0.8411 | 2.65E-29  | 1.24E-27  | Down-regulated |
| NM_018669    | WDR4           | 10785  | 10.0152  | 11.0142  | 6.4655    | 4.46185    | -0.8414 | 0.0001613 | 0.0009927 | Down-regulated |
| NM_014880    | CD302          | 9936   | 3.10195  | 2.7955   | 1.73262   | 1.2083     | -0.8415 | 0.0015188 | 0.0073447 | Down-regulated |
| NM_0022783   | DEPTOR         | 64798  | 5.03573  | 4.84502  | 2.69693   | 2.45536    | -0.8416 | 0.000144  | 0.0008978 | Down-regulated |
| NM_003390    | WEE1           | 7465   | 11.0525  | 11.2298  | 6.53369   | 5.5585     | -0.8424 | 1.79E-09  | 2.29E-08  | Down-regulated |
| NR_110115    | OC10192774     | 1E+08  | 20.2406  | 20.5248  | 11.7367   | 9.83218    | -0.8425 | 1.54E-05  | 0.0001165 | Down-regulated |
| NM_001203248 | EZH2           | 2146   | 5.02465  | 5.38154  | 2.6185    | 2.81715    | -0.8434 | 8.52E-05  | 0.0005559 | Down-regulated |
| NM_001145772 | ADGRG1         | 9289   | 5.50258  | 4.10882  | 2.62014   | 2.39551    | -0.8441 | 7.53E-05  | 0.0004969 | Down-regulated |
| NM_001040664 | PAN-P2RY1      | 692312 | 4.82372  | 5.44419  | 2.52749   | 2.86577    | -0.845  | 3.94E-05  | 0.0002751 | Down-regulated |
| NM_000059    | BRCA2          | 675    | 1.07111  | 1.17689  | 0.487258  | 0.656851   | -0.8455 | 0.0004659 | 0.0025885 | Down-regulated |
| NR_073136    | HPS4           | 89781  | 4.09462  | 3.76839  | 1.92524   | 2.23621    | -0.8469 | 5.15E-06  | 4.28E-05  | Down-regulated |
| NM_004580    | RAB27A         | 5873   | 28.4105  | 24.4614  | 14.2161   | 14.6891    | -0.8474 | 2.76E-16  | 6.34E-15  | Down-regulated |
| NM_001145315 | DSN1           | 79980  | 7.91617  | 9.09537  | 5.3199    | 3.03665    | -0.8477 | 0.0018775 | 0.0088012 | Down-regulated |
| NM_001164273 | MGA            | 23269  | 1.5232   | 1.58488  | 0.461861  | 0.997012   | -0.849  | 0.0047643 | 0.0196442 | Down-regulated |
| NM_017754    | UHRF1BP1       | 54887  | 3.46271  | 3.69349  | 2.08073   | 1.78456    | -0.8491 | 2.67E-09  | 3.37E-08  | Down-regulated |
| NM_003560    | PLA2G6         | 8398   | 21.2804  | 21.1353  | 12.0509   | 11.1543    | -0.8502 | 1.54E-19  | 4.44E-18  | Down-regulated |
| NM_022154    | SLC39A8        | 64116  | 7.14701  | 4.28453  | 2.70063   | 2.95524    | -0.8504 | 0.0014215 | 0.0069518 | Down-regulated |
| NM_001139443 | BEST1          | 7439   | 5.32886  | 5.31048  | 3.08709   | 2.38275    | -0.8504 | 0.0001552 | 0.0009601 | Down-regulated |
| NM_003624    | RANBP3         | 8498   | 3.01881  | 0.223408 | 0.0599811 | 0.132143   | -0.8511 | 0.0083979 | 0.0319831 | Down-regulated |
| NM_002692    | POLE2          | 5427   | 3.55003  | 2.85738  | 1.57282   | 1.23697    | -0.8512 | 0.0091012 | 0.0341778 | Down-regulated |
| NM_000221    | KHK            | 3795   | 2.17271  | 2.19551  | 0.946719  | 0.985545   | -0.8538 | 0.008178  | 0.0312701 | Down-regulated |
| NM_004483    | GCSH           | 2653   | 31.6955  | 31.5889  | 17.0065   | 17.3524    | -0.8542 | 4.19E-14  | 8.33E-13  | Down-regulated |
| NM_203467    | LRR1           | 122769 | 12.6887  | 11.0684  | 5.14738   | 6.50272    | -0.8551 | 0.0015246 | 0.0073693 | Down-regulated |
| NM_001105564 | CCHCR1         | 54535  | 2.79859  | 2.13732  | 1.2614    | 1.02927    | -0.8553 | 0.0051268 | 0.0209668 | Down-regulated |
| NM_022037    | TIA1           | 7072   | 1.66627  | 1.71312  | 0.955882  | 0.621908   | -0.8553 | 0.0048522 | 0.0199549 | Down-regulated |
| NM_152463    | EME1           | 146956 | 5.24071  | 5.58812  | 2.75322   | 2.79212    | -0.8558 | 0.0001554 | 0.0009611 | Down-regulated |
| NM_001323973 | SLC9A5         | 6553   | 1.01772  | 1.57655  | 0.554085  | 0.479499   | -0.8568 | 0.0132519 | 0.0469591 | Down-regulated |
| NM_022490    | POLR1E         | 64425  | 11.2423  | 10.9122  | 5.7536    | 5.93535    | -0.8584 | 1.18E-06  | 1.08E-05  | Down-regulated |
| NM_001319984 | FANCD2         | 2177   | 1.85082  | 1.62024  | 0.960482  | 0.732905   | -0.8591 | 0.0017719 | 0.008378  | Down-regulated |
| NM_003702    | RGS20          | 8601   | 25.3218  | 24.1317  | 12.5734   | 14.0228    | -0.8595 | 4.67E-11  | 7.10E-10  | Down-regulated |
| NM_012474    | UCK2           | 7371   | 24.3775  | 23.783   | 13.128    | 13.1758    | -0.8596 | 2.82E-38  | 1.76E-36  | Down-regulated |
| NM_014264    | PLK4           | 10733  | 1.96177  | 2.12276  | 0.867748  | 1.08365    | -0.8598 | 0.0024176 | 0.0109594 | Down-regulated |
| NM_030919    | FAM83D         | 81610  | 16.2589  | 17.1476  | 9.53964   | 8.42032    | -0.8598 | 8.82E-11  | 1.31E-09  | Down-regulated |
| NM_024896    | ERMP1          | 79956  | 7.49644  | 7.14582  | 3.85957   | 4.03653    | -0.8598 | 9.38E-13  | 1.64E-11  | Down-regulated |
| NM_001252030 | TRPM1          | 4308   | 12.305   | 15.5575  | 6.32524   | 7.38142    | -0.8599 | 0.0010655 | 0.0053972 | Down-regulated |

|              |               |        |          |          |          |           |         |           |           |                |
|--------------|---------------|--------|----------|----------|----------|-----------|---------|-----------|-----------|----------------|
| NM_020300    | MGST1         | 4257   | 66.4103  | 65.6534  | 35.851   | 35.6417   | -0.8602 | 3.11E-15  | 6.73E-14  | Down-regulated |
| NM_015271    | TRIM2         | 23231  | 33.2801  | 33.6345  | 17.3468  | 19.2015   | -0.8602 | 1.81E-39  | 1.18E-37  | Down-regulated |
| NM_001290293 | SDR39U1       | 56948  | 3.52186  | 4.16141  | 1.51386  | 1.45802   | -0.8605 | 0.0142206 | 0.0498922 | Down-regulated |
| NM_153832    | GPR161        | 23432  | 1.85165  | 2.56297  | 1.13131  | 1.12878   | -0.861  | 0.0001321 | 0.0008299 | Down-regulated |
| NM_003177    | SYK           | 6850   | 3.68921  | 4.38464  | 2.16492  | 2.06316   | -0.8611 | 3.57E-06  | 3.04E-05  | Down-regulated |
| NM_032117    | MND1          | 84057  | 11.8773  | 11.0677  | 5.3433   | 5.77679   | -0.8648 | 0.0014517 | 0.0070815 | Down-regulated |
| NM_001326348 | CELF2         | 10659  | 1.92267  | 1.8862   | 0.979614 | 0.637111  | -0.8649 | 0.0093879 | 0.035082  | Down-regulated |
| NM_002394    | SLC3A2        | 6520   | 18.5151  | 14.9629  | 8.04798  | 9.58367   | -0.866  | 4.01E-07  | 3.92E-06  | Down-regulated |
| NM_004233    | CD83          | 9308   | 6.39569  | 6.29777  | 3.87505  | 2.11833   | -0.8663 | 0.0025172 | 0.0113519 | Down-regulated |
| NM_013417    | IARS          | 3376   | 12.2442  | 11.3909  | 5.4953   | 7.08069   | -0.8664 | 3.57E-09  | 4.46E-08  | Down-regulated |
| NM_022081    | HPS4          | 89781  | 28.5663  | 26.9646  | 15.572   | 14.5132   | -0.8696 | 2.68E-33  | 1.44E-31  | Down-regulated |
| NM_014096    | SLC43A3       | 29015  | 4.27827  | 5.52778  | 2.22354  | 2.6372    | -0.8727 | 0.0004522 | 0.0025169 | Down-regulated |
| NM_004418    | DUSP2         | 1844   | 10.8672  | 12.0936  | 5.56016  | 6.26184   | -0.8735 | 9.45E-06  | 7.47E-05  | Down-regulated |
| NM_032229    | SLITRK6       | 84189  | 1.06394  | 1.27587  | 0.443335 | 0.552152  | -0.8748 | 0.0087795 | 0.0331457 | Down-regulated |
| NM_006993    | NPM3          | 10360  | 58.6347  | 61.1348  | 30.1932  | 33.3771   | -0.8751 | 1.39E-11  | 2.20E-10  | Down-regulated |
| NM_001321065 | APOC1         | 341    | 28.1795  | 22.4606  | 8.46491  | 14.1424   | -0.876  | 0.0048951 | 0.0201227 | Down-regulated |
| NM_181359    | IL6R          | 3570   | 4.33324  | 3.77221  | 0.961047 | 2.57175   | -0.8761 | 0.0065607 | 0.025859  | Down-regulated |
| NM_004856    | KIF23         | 9493   | 13.378   | 14.1786  | 7.40285  | 7.33645   | -0.8762 | 5.17E-15  | 1.10E-13  | Down-regulated |
| NM_001282129 | SSH2          | 85464  | 2.21104  | 1.99046  | 1.14781  | 1.04599   | -0.8769 | 8.48E-07  | 7.95E-06  | Down-regulated |
| NM_006631    | ZNF266        | 10781  | 2.60534  | 1.48806  | 0.996404 | 0.688328  | -0.877  | 0.0091547 | 0.0343381 | Down-regulated |
| NM_004523    | KIF11         | 3832   | 6.37901  | 7.17533  | 3.05062  | 4.00631   | -0.8776 | 7.19E-07  | 6.81E-06  | Down-regulated |
| NM_001256421 | GPAT3         | 84803  | 6.59557  | 5.55156  | 1.40938  | 3.68052   | -0.8777 | 0.0086086 | 0.0326295 | Down-regulated |
| NM_001008708 | CHAC2         | 494143 | 6.05618  | 6.42369  | 2.29734  | 3.33344   | -0.878  | 0.0042836 | 0.0179213 | Down-regulated |
| NM_207446    | FAM174B       | 400451 | 1.9998   | 2.48281  | 1.05678  | 0.895526  | -0.8783 | 0.0064065 | 0.0253226 | Down-regulated |
| NM_001029860 | FBXO43        | 286151 | 1.21711  | 1.72876  | 0.478223 | 0.674624  | -0.8788 | 0.0115982 | 0.0419392 | Down-regulated |
| NM_001302693 | TRIM2         | 23321  | 15.3948  | 15.3214  | 7.78023  | 6.43548   | -0.88   | 0.0026177 | 0.0117326 | Down-regulated |
| NR_104200    | BCL2L12       | 83596  | 5.74681  | 7.84423  | 3.49941  | 2.96911   | -0.8801 | 0.0014757 | 0.0071655 | Down-regulated |
| NM_001345861 | ABLM3         | 22885  | 4.16326  | 3.4479   | 1.90177  | 1.98321   | -0.8814 | 1.77E-05  | 0.0001323 | Down-regulated |
| NM_012485    | HMMR          | 3161   | 7.00077  | 6.85688  | 3.79687  | 3.41174   | -0.8815 | 3.03E-07  | 3.01E-06  | Down-regulated |
| NM_018685    | ANLN          | 54443  | 8.80568  | 8.12586  | 5.03447  | 3.80023   | -0.8815 | 1.44E-07  | 1.50E-06  | Down-regulated |
| NM_003318    | TTK           | 7272   | 6.17171  | 6.46949  | 3.50716  | 3.00341   | -0.8817 | 3.66E-06  | 3.11E-05  | Down-regulated |
| NM_205846    | PRELID2       | 153768 | 1.57561  | 1.70251  | 0.788799 | 0.766788  | -0.8822 | 0.001199  | 0.0059863 | Down-regulated |
| NM_001286734 | CENPE         | 1062   | 2.66954  | 2.64827  | 1.13897  | 1.56899   | -0.8834 | 1.66E-05  | 0.0001249 | Down-regulated |
| NM_153339    | PUSL1         | 126789 | 18.1417  | 15.8343  | 9.24663  | 8.1228    | -0.8846 | 8.25E-06  | 6.60E-05  | Down-regulated |
| NM_012113    | CA14          | 23632  | 6.96775  | 6.1907   | 3.22774  | 3.28068   | -0.8847 | 0.0002378 | 0.0014072 | Down-regulated |
| NM_002528    | NTHL1         | 4913   | 27.9545  | 28.9454  | 14.4646  | 15.2375   | -0.8849 | 1.90E-08  | 2.18E-07  | Down-regulated |
| NM_005484    | e) polymerase | 10038  | 12.4417  | 12.9887  | 6.65275  | 6.57677   | -0.8857 | 6.81E-08  | 7.33E-07  | Down-regulated |
| NM_031935    | HMCN1         | 83872  | 9.8846   | 10.5643  | 5.4401   | 5.53326   | -0.8861 | 1.24E-45  | 9.77E-44  | Down-regulated |
| NM_002949    | MRPL12        | 6182   | 127.372  | 125.088  | 66.8882  | 68.1485   | -0.8864 | 1.99E-33  | 1.08E-31  | Down-regulated |
| NM_001251989 | GMNN          | 51053  | 15.4173  | 13.4338  | 7.33735  | 7.07874   | -0.8882 | 6.71E-05  | 0.0004477 | Down-regulated |
| NR_038430    | NASEH1-AS     | 1E+08  | 6.74276  | 6.18842  | 3.21872  | 2.78971   | -0.8888 | 0.001796  | 0.0084751 | Down-regulated |
| NM_001272086 | OCI10013037   | 1E+08  | 7.88344  | 8.93273  | 2.40329  | 3.92666   | -0.8893 | 0.0115096 | 0.041705  | Down-regulated |
| NM_001039538 | MAP2          | 4133   | 1.02639  | 1.04423  | 0.488595 | 0.458317  | -0.8899 | 0.0031459 | 0.013689  | Down-regulated |
| NM_005431    | XRCC2         | 7516   | 1.92091  | 2.42924  | 1.01368  | 0.923571  | -0.8913 | 0.0037982 | 0.0161883 | Down-regulated |
| NM_001330414 | BCAS3         | 54828  | 6.3258   | 4.76534  | 2.86971  | 2.70337   | -0.8914 | 2.87E-05  | 0.0002062 | Down-regulated |
| NM_020796    | SEMA6A        | 57556  | 9.46179  | 9.59202  | 5.2826   | 4.83095   | -0.892  | 1.65E-20  | 5.03E-19  | Down-regulated |
| NM_005427    | TP73          | 7161   | 1.93013  | 1.57074  | 0.774976 | 0.885528  | -0.8925 | 0.0010251 | 0.0052204 | Down-regulated |
| NM_001142621 | TGFBRAP1      | 9392   | 3.53823  | 3.24485  | 1.54023  | 1.90836   | -0.8938 | 6.11E-06  | 5.02E-05  | Down-regulated |
| NM_005879    | TRAP1         | 10293  | 8.33123  | 10.2173  | 4.24222  | 5.04039   | -0.8945 | 3.97E-05  | 0.0002771 | Down-regulated |
| NR_130917    | CCDC26        | 137196 | 3.65075  | 3.84642  | 1.44849  | 1.81675   | -0.8951 | 0.0045372 | 0.0188298 | Down-regulated |
| NM_001291869 | IGF2BP2       | 10644  | 3.82936  | 1.53427  | 1.09305  | 1.0304    | -0.8957 | 0.0088221 | 0.0332801 | Down-regulated |
| NM_001085400 | RELL1         | 768211 | 3.31675  | 3.64139  | 1.71165  | 1.74744   | -0.8957 | 6.54E-05  | 0.0004373 | Down-regulated |
| NM_001287740 | STK32A        | 202374 | 3.47099  | 3.169    | 1.62976  | 1.7409    | -0.8962 | 4.52E-06  | 3.80E-05  | Down-regulated |
| NM_002758    | MAP2K6        | 5608   | 5.4873   | 4.66449  | 2.09364  | 2.63078   | -0.8965 | 0.0014677 | 0.0071321 | Down-regulated |
| NM_001320047 | C1orf112      | 55732  | 3.90001  | 3.58842  | 1.21655  | 2.16347   | -0.8975 | 0.0028757 | 0.0127073 | Down-regulated |
| NR_028103    | DCAF8         | 50717  | 9.0895   | 11.2288  | 6.13329  | 4.06408   | -0.8976 | 2.33E-05  | 0.0001703 | Down-regulated |
| NM_001099650 | GXYLT1        | 283464 | 2.46789  | 2.55303  | 1.18073  | 1.37878   | -0.8982 | 1.51E-06  | 1.37E-05  | Down-regulated |
| NM_001165931 | RRM2          | 6241   | 12.4924  | 12.8765  | 6.83008  | 6.50468   | -0.8984 | 9.26E-15  | 1.93E-13  | Down-regulated |
| NM_004217    | AURKB         | 9212   | 30.7448  | 30.9787  | 15.5549  | 16.6694   | -0.8996 | 1.12E-11  | 1.78E-10  | Down-regulated |
| NM_001010000 | ARHGAP28      | 79822  | 1.66022  | 1.54409  | 0.757107 | 0.780061  | -0.9007 | 0.0005035 | 0.0027677 | Down-regulated |
| NM_001290052 | UHRF1         | 29128  | 0.729966 | 4.81007  | 0.551255 | 0.704924  | -0.902  | 0.0127958 | 0.0456136 | Down-regulated |
| NM_001324220 | HMGCS1        | 3157   | 1.27088  | 1.31194  | 0.659735 | 0.225868  | -0.9021 | 0.0121173 | 0.0435854 | Down-regulated |
| NM_001270507 | TNFAIP3       | 7128   | 0.864545 | 3.42224  | 0.449791 | 0.0417951 | -0.9028 | 0.0083593 | 0.0318678 | Down-regulated |
| NM_021734    | SLC25A19      | 60386  | 8.52965  | 9.24499  | 4.89757  | 3.74247   | -0.9033 | 0.0001739 | 0.0010618 | Down-regulated |
| NM_019013    | FAM64A        | 54478  | 64.8438  | 63.8028  | 32.3884  | 35.4895   | -0.9034 | 2.80E-25  | 1.11E-23  | Down-regulated |
| NM_146387    | MRPL4         | 51073  | 60.7526  | 68.1882  | 29.5054  | 37.3894   | -0.9039 | 1.30E-10  | 1.89E-09  | Down-regulated |
| NM_001018112 | FANCA         | 2175   | 2.97428  | 3.82566  | 1.38547  | 1.35181   | -0.905  | 0.0065562 | 0.0258555 | Down-regulated |
| NM_003486    | SLC7A5        | 8140   | 89.1081  | 93.68    | 50.2223  | 46.6425   | -0.905  | 1.13E-57  | 1.18E-55  | Down-regulated |
| NM_022836    | DCLRE1B       | 64858  | 3.43224  | 2.56389  | 1.13149  | 1.62702   | -0.9055 | 0.0015139 | 0.0073285 | Down-regulated |
| NM_001319999 | RACGAP1       | 29127  | 15.4378  | 16.7152  | 8.22691  | 8.59955   | -0.906  | 1.22E-15  | 2.73E-14  | Down-regulated |
| NM_001673    | e-hydrolyzing | 440    | 47.8672  | 45.6259  | 26.9685  | 21.8425   | -0.9069 | 2.16E-14  | 4.37E-13  | Down-regulated |
| NM_001301010 | ALKBH8        | 91801  | 1.15682  | 0.916052 | 0.362777 | 0.424528  | -0.9071 | 0.0088975 | 0.0335181 | Down-regulated |
| NM_000179    | MSH6          | 2956   | 14.4349  | 11.3008  | 5.99246  | 7.21266   | -0.9073 | 2.69E-08  | 3.03E-07  | Down-regulated |
| NM_032776    | JMJD1C        | 221037 | 0.773613 | 0.794557 | 0.104172 | 0         | -0.9083 | 0.0061019 | 0.0242843 | Down-regulated |
| NM_001256875 | CDCA8         | 55143  | 9.06339  | 8.3195   | 4.70969  | 4.09458   | -0.9083 | 7.00E-07  | 6.65E-06  | Down-regulated |
| NM_001164162 | PPP6R3        | 55291  | 1.5659   | 1.6885   | 0.776927 | 0.756416  | -0.9088 | 0.0007018 | 0.003729  | Down-regulated |
| NM_004615    | TSPAN7        | 7102   | 12.3338  | 10.4417  | 5.15478  | 6.21198   | -0.9089 | 1.14E-05  | 8.85E-05  | Down-regulated |
| NM_018369    | DEPDC1B       | 55789  | 7.88057  | 8.55666  | 3.57805  | 4.63339   | -0.9092 | 9.04E-06  | 7.18E-05  | Down-regulated |
| NM_002461    | MVD           | 4597   | 84.8318  | 83.2866  | 44.4814  | 44.2425   | -0.9097 | 1.68E-49  | 1.50E-47  | Down-regulated |
| NR_026982    | RPL23AP82     | 284942 | 6.36078  | 4.99746  | 2.76745  | 2.2011    | -0.9097 | 0.0029629 | 0.0130293 | Down-regulated |
| NM_203370    | FAM212A       | 389119 | 7.97552  | 9.05777  | 3.29058  | 4.24414   | -0.9108 | 0.0026907 | 0.0120063 | Down-regulated |
| NM_001012267 | CENPP         | 401541 | 1.99465  | 1.88534  | 0.914229 | 0.806659  | -0.912  | 0.0023054 | 0.010498  | Down-regulated |
| NM_024945    | RMI1          | 80010  | 2.88331  | 2.57192  | 1.39969  | 1.16094   | -0.9122 | 0.0006029 | 0.0032558 | Down-regulated |
| NR_125981    | SS18L1        | 26039  | 2.43444  | 2.54938  | 0.930279 | 1.35008   | -0.9128 | 0.001337  | 0.0065961 | Down-regulated |

|              |               |        |          |          |          |          |         |           |           |                |
|--------------|---------------|--------|----------|----------|----------|----------|---------|-----------|-----------|----------------|
| NR_027756    | ein coding)(F | 283902 | 6.30159  | 6.16726  | 1.74823  | 3.04692  | -0.914  | 0.0079482 | 0.0305198 | Down-regulated |
| NM_020786    | PDP2          | 57546  | 2.98949  | 3.15483  | 1.76828  | 1.29224  | -0.9141 | 8.06E-06  | 6.46E-05  | Down-regulated |
| NM_001172220 | sophila)(SCM  | 22955  | 3.75601  | 3.48411  | 2.0122   | 1.33289  | -0.9142 | 0.000981  | 0.0050238 | Down-regulated |
| NM_001323359 | ST3GAL6       | 10402  | 4.86062  | 4.73601  | 2.62208  | 2.1519   | -0.9145 | 9.49E-06  | 7.50E-05  | Down-regulated |
| NM_001113482 | MANEAL        | 149175 | 7.77671  | 8.41826  | 4.20041  | 4.03058  | -0.9146 | 4.46E-08  | 4.91E-07  | Down-regulated |
| NM_001271427 | EMC1          | 23065  | 4.27423  | 3.95676  | 2.33156  | 1.83853  | -0.9148 | 2.00E-07  | 2.04E-06  | Down-regulated |
| NM_001282763 | CDV3          | 55573  | 10.0304  | 7.17009  | 5.00945  | 3.03756  | -0.9161 | 0.0005993 | 0.0032391 | Down-regulated |
| NM_032322    | RNF135        | 84282  | 5.0072   | 4.99194  | 2.33041  | 2.47891  | -0.9166 | 0.0002003 | 0.0012075 | Down-regulated |
| NM_183234    | RAB27A        | 5873   | 1.39995  | 1.35792  | 0.285221 | 0.624159 | -0.9169 | 0.010977  | 0.0400953 | Down-regulated |
| NM_001136191 | KANK2         | 25959  | 3.82666  | 4.59133  | 2.06799  | 2.16842  | -0.9174 | 7.02E-07  | 6.66E-06  | Down-regulated |
| NM_001018109 | PIR           | 8544   | 112.683  | 104.66   | 50.4274  | 62.3249  | -0.9176 | 2.52E-16  | 5.83E-15  | Down-regulated |
| NM_001083961 | WDR62         | 284403 | 8.32148  | 7.50602  | 3.30716  | 4.64151  | -0.9183 | 9.17E-07  | 8.56E-06  | Down-regulated |
| NM_203383    | RNH1          | 6050   | 8.53054  | 11.5692  | 4.81939  | 4.9929   | -0.9206 | 4.38E-05  | 0.0003026 | Down-regulated |
| NM_001211    | BUB1B         | 701    | 10.3055  | 10.7137  | 5.29669  | 5.55509  | -0.9211 | 6.05E-14  | 1.18E-12  | Down-regulated |
| NM_003692    | TMEFF1        | 8577   | 1.71344  | 1.93139  | 0.374559 | 0.808153 | -0.9213 | 0.0107959 | 0.0395243 | Down-regulated |
| NM_004490    | GRB14         | 2888   | 1.85852  | 2.24844  | 0.8223   | 0.798944 | -0.9217 | 0.0062053 | 0.0246546 | Down-regulated |
| NM_0032808   | LINGO1        | 84894  | 24.2524  | 24.1721  | 12.3385  | 12.8934  | -0.9219 | 3.42E-26  | 1.42E-24  | Down-regulated |
| NM_006540    | NCOA2         | 10499  | 3.45201  | 3.76978  | 1.87557  | 1.82863  | -0.922  | 5.78E-11  | 8.70E-10  | Down-regulated |
| NM_018492    | PBK           | 55872  | 30.151   | 25.976   | 13.8406  | 15.0673  | -0.9226 | 3.03E-13  | 5.57E-12  | Down-regulated |
| NM_152421    | FAM69B        | 138311 | 19.5656  | 18.6968  | 10.292   | 9.40003  | -0.9242 | 4.66E-14  | 9.24E-13  | Down-regulated |
| NM_001128424 | FAM198B       | 51313  | 5.51415  | 3.46036  | 2.01678  | 2.22215  | -0.9266 | 0.0002153 | 0.0012873 | Down-regulated |
| NM_001949    | E2F3          | 1871   | 6.9688   | 7.73553  | 3.72207  | 3.80372  | -0.9278 | 3.48E-12  | 5.76E-11  | Down-regulated |
| NM_018057    | SLC6A15       | 55117  | 7.0102   | 7.01943  | 3.41841  | 3.72174  | -0.9285 | 6.57E-11  | 9.85E-10  | Down-regulated |
| NM_001324222 | HMGCS1        | 3157   | 0.699465 | 0.720627 | 0.149838 | 0.293823 | -0.9287 | 0.0102812 | 0.0379308 | Down-regulated |
| NM_001177637 | DAG1          | 1605   | 2.35836  | 1.9771   | 0.36346  | 1.17179  | -0.929  | 0.0086816 | 0.0328344 | Down-regulated |
| NM_005573    | LMNB1         | 4001   | 19.1757  | 17.6342  | 9.29553  | 9.69316  | -0.9292 | 1.94E-19  | 5.56E-18  | Down-regulated |
| NM_017955    | CDC4A         | 55038  | 15.1085  | 14.4964  | 7.34295  | 7.79451  | -0.9294 | 1.67E-12  | 2.87E-11  | Down-regulated |
| NM_007298    | BRCA1         | 672    | 2.65983  | 2.17597  | 0.474168 | 1.26078  | -0.931  | 0.0082212 | 0.0313984 | Down-regulated |
| NM_001324436 | PARL          | 55486  | 5.29906  | 4.46226  | 1.99986  | 2.03306  | -0.9321 | 0.0038733 | 0.0164715 | Down-regulated |
| NM_001244963 | NAV2          | 89797  | 2.79504  | 2.54841  | 1.26229  | 1.44721  | -0.9325 | 9.66E-10  | 1.28E-08  | Down-regulated |
| NM_001184990 | NDUFC1        | 4717   | 22.115   | 15.5135  | 6.70259  | 9.30686  | -0.9341 | 0.0024909 | 0.0112566 | Down-regulated |
| NM_000791    | DHFR          | 1719   | 13.0455  | 14.0682  | 6.95945  | 6.96312  | -0.9344 | 6.60E-18  | 1.69E-16  | Down-regulated |
| NM_152355    | ZNF441        | 126068 | 1.42857  | 1.40888  | 0.484026 | 0.693174 | -0.9345 | 0.0031818 | 0.0138359 | Down-regulated |
| NM_152429    | FGFBP3        | 143282 | 2.63705  | 2.40095  | 1.18807  | 0.967133 | -0.935  | 0.0025683 | 0.0115439 | Down-regulated |
| NM_000933    | PLCB4         | 5332   | 4.62168  | 3.59705  | 1.44944  | 2.37764  | -0.935  | 0.0003147 | 0.0018163 | Down-regulated |
| NM_001330566 | ZC3H13        | 23091  | 10.629   | 9.80429  | 5.56986  | 4.93921  | -0.9352 | 1.56E-20  | 4.76E-19  | Down-regulated |
| NM_018101    | CDC48         | 55143  | 5.08703  | 6.16937  | 2.49388  | 2.85032  | -0.9359 | 9.31E-05  | 0.0006023 | Down-regulated |
| NM_006479    | RAD51AP1      | 10635  | 5.37083  | 6.51759  | 3.2097   | 2.2347   | -0.936  | 0.0004977 | 0.00274   | Down-regulated |
| NM_017518    | HAUS7         | 55559  | 15.4067  | 15.0066  | 8.2068   | 6.66709  | -0.9377 | 3.73E-06  | 3.17E-05  | Down-regulated |
| NM_015465    | GEMIN5        | 25929  | 6.05449  | 6.02003  | 2.88276  | 3.23853  | -0.9378 | 1.47E-11  | 2.31E-10  | Down-regulated |
| NM_152996    | T6GALNAC      | 256435 | 4.1248   | 3.7592   | 1.72164  | 2.04991  | -0.9378 | 5.81E-05  | 0.0003924 | Down-regulated |
| NM_198436    | AURKA         | 6790   | 5.95388  | 2.80475  | 1.99204  | 0.79172  | -0.9388 | 0.0092482 | 0.0346414 | Down-regulated |
| NM_017882    | CLN6          | 54982  | 26.7521  | 26.3661  | 13.4855  | 13.7308  | -0.9405 | 2.72E-21  | 8.56E-20  | Down-regulated |
| NM_004237    | TRIP13        | 9319   | 22.1168  | 20.2127  | 9.65105  | 11.7302  | -0.9409 | 2.44E-11  | 3.78E-10  | Down-regulated |
| NM_173630    | RTTN          | 25914  | 2.45242  | 2.47406  | 1.2673   | 1.16602  | -0.9412 | 3.81E-07  | 3.74E-06  | Down-regulated |
| NM_148912    | ABHD11        | 83451  | 6.81815  | 3.60099  | 1.74308  | 2.09438  | -0.9416 | 0.0064046 | 0.0253203 | Down-regulated |
| NM_001269    | RCC1          | 1104   | 28.7899  | 25.84    | 15.9871  | 11.1799  | -0.9417 | 6.16E-08  | 6.66E-07  | Down-regulated |
| NM_007370    | RFC5          | 5985   | 12.2091  | 11.0466  | 5.72984  | 5.9021   | -0.9421 | 1.36E-08  | 1.59E-07  | Down-regulated |
| NM_198044    | ZDHHC16       | 84287  | 2.83099  | 3.15629  | 0.797585 | 1.31644  | -0.9429 | 0.0071315 | 0.0277987 | Down-regulated |
| NM_144711    | KLHL23        | 151230 | 3.26057  | 3.47899  | 1.77715  | 1.43226  | -0.9439 | 3.74E-05  | 0.0002625 | Down-regulated |
| NM_025069    | ZNF703        | 80139  | 52.7887  | 50.3868  | 27.4218  | 25.6537  | -0.9456 | 1.68E-45  | 1.32E-43  | Down-regulated |
| NM_018593    | SLC16A10      | 117247 | 2.53646  | 2.44274  | 1.21562  | 0.906135 | -0.9456 | 0.0018635 | 0.0087463 | Down-regulated |
| NM_000927    | ABCB1         | 5243   | 2.56224  | 2.61352  | 1.14332  | 1.32616  | -0.946  | 3.96E-05  | 0.0002765 | Down-regulated |
| NM_001324445 | ADAT1         | 23536  | 3.90519  | 2.01495  | 1.50715  | 0.95814  | -0.9466 | 0.0026776 | 0.011966  | Down-regulated |
| NM_001286710 | ACSL1         | 2180   | 8.69508  | 9.62597  | 4.56327  | 4.67548  | -0.9466 | 3.13E-12  | 5.21E-11  | Down-regulated |
| NM_016235    | GPRC5B        | 51704  | 29.2036  | 27.8776  | 14.9771  | 14.2409  | -0.9468 | 5.80E-28  | 2.62E-26  | Down-regulated |
| NM_001202517 | CFLAR         | 8837   | 0.423866 | 0.533928 | 0.205027 | 0.170532 | -0.9475 | 0.0044659 | 0.0185741 | Down-regulated |
| NM_001203263 | IL17RC        | 84818  | 4.47608  | 6.01005  | 2.80291  | 1.72773  | -0.9481 | 0.0015289 | 0.007385  | Down-regulated |
| NM_001318164 | mutative)(PUS | 54517  | 3.77477  | 5.19955  | 2.29451  | 1.86215  | -0.9487 | 0.0001646 | 0.0010112 | Down-regulated |
| NM_000251    | MSH2          | 4436   | 21.4738  | 18.4341  | 9.74943  | 10.4443  | -0.9489 | 4.37E-15  | 9.37E-14  | Down-regulated |
| NR_104487    | ZDHHC20       | 253832 | 2.87326  | 0.991822 | 0.68745  | 0.628116 | -0.9496 | 0.0075    | 0.0290499 | Down-regulated |
| NM_001238    | CCNE1         | 898    | 8.08095  | 7.76108  | 3.81605  | 3.83077  | -0.9503 | 4.93E-06  | 4.11E-05  | Down-regulated |
| NM_207411    | XKR5          | 389610 | 0.925943 | 1.13298  | 0.462302 | 0.296134 | -0.9506 | 0.0056865 | 0.022893  | Down-regulated |
| NM_022074    | FAM111A       | 63901  | 3.77941  | 4.68296  | 2.34045  | 1.4725   | -0.9513 | 0.0004895 | 0.0027002 | Down-regulated |
| NM_001114121 | CHEK1         | 1111   | 3.31848  | 3.22465  | 1.64433  | 1.26969  | -0.9514 | 0.000756  | 0.0039959 | Down-regulated |
| NM_001159767 | BZW2          | 28969  | 10.1542  | 9.69115  | 4.46351  | 5.1974   | -0.9515 | 1.80E-06  | 1.60E-05  | Down-regulated |
| NM_001345871 | PIPSK2        | 23262  | 1.09029  | 1.71202  | 0.668291 | 0.541502 | -0.9517 | 0.0014351 | 0.0070128 | Down-regulated |
| NM_001145356 | CBWD1         | 55871  | 3.73627  | 4.08179  | 1.79505  | 1.40487  | -0.9525 | 0.0028799 | 0.0127182 | Down-regulated |
| NM_021116    | ADCY1         | 107    | 4.34634  | 4.33412  | 2.25828  | 2.1513   | -0.9532 | 1.44E-21  | 4.61E-20  | Down-regulated |
| NR_110866    | TSPAN10       | 83882  | 2.81004  | 2.97937  | 1.2147   | 1.08352  | -0.9536 | 0.003557  | 0.0152967 | Down-regulated |
| NM_002589    | PCDH7         | 5099   | 18.9705  | 20.5644  | 10.2907  | 9.81363  | -0.9549 | 2.55E-27  | 1.12E-25  | Down-regulated |
| NM_024110    | CARD14        | 79092  | 1.21264  | 1.402    | 0.507201 | 0.553421 | -0.955  | 0.002931  | 0.0129189 | Down-regulated |
| NM_000381    | MID1          | 4281   | 2.5235   | 1.89491  | 0.676561 | 1.22138  | -0.9555 | 0.0014597 | 0.0071003 | Down-regulated |
| NM_001289131 | TUBB4A        | 10382  | 6.83149  | 4.51444  | 1.59561  | 3.03733  | -0.9558 | 0.0027047 | 0.0120605 | Down-regulated |
| NM_001098208 | HNRNPF        | 3185   | 19.6952  | 18.8466  | 8.5501   | 10.7145  | -0.9567 | 1.41E-11  | 2.22E-10  | Down-regulated |
| NR_110375    | THRIL         | 1E+08  | 3.79283  | 4.43143  | 1.9371   | 1.60928  | -0.957  | 0.0011173 | 0.0056266 | Down-regulated |
| NM_024857    | ATAD5         | 79915  | 1.88944  | 1.80476  | 0.900933 | 0.861076 | -0.9585 | 1.16E-05  | 9.03E-05  | Down-regulated |
| NM_001287815 | UBAP2L        | 9898   | 0.953068 | 1.34283  | 0.229394 | 0.430133 | -0.96   | 0.0083026 | 0.0316767 | Down-regulated |
| NM_018944    | MIS18A        | 54069  | 15.1994  | 12.5492  | 6.23369  | 7.10318  | -0.9612 | 2.53E-06  | 2.20E-05  | Down-regulated |
| NM_003034    | ST8SIA1       | 6489   | 11.4939  | 10.8823  | 5.92279  | 5.41968  | -0.9617 | 9.68E-32  | 4.97E-30  | Down-regulated |
| NM_001282984 | FARP2         | 9855   | 4.3209   | 2.81159  | 1.59174  | 1.33086  | -0.9624 | 0.0021462 | 0.0098838 | Down-regulated |
| NM_002612    | PDK4          | 5166   | 3.18428  | 3.69768  | 1.60182  | 1.62865  | -0.9626 | 3.08E-05  | 0.0002199 | Down-regulated |
| NM_015313    | ARHGEF12      | 23365  | 5.38828  | 3.84919  | 2.22181  | 2.28432  | -0.9633 | 9.73E-08  | 1.03E-06  | Down-regulated |
| NM_152259    | TICRR         | 90381  | 2.48495  | 3.23312  | 1.4896   | 1.21512  | -0.9633 | 1.79E-05  | 0.0001339 | Down-regulated |

|              |               |        |          |          |          |          |         |           |           |                |
|--------------|---------------|--------|----------|----------|----------|----------|---------|-----------|-----------|----------------|
| NM_172244    | SGCD          | 6444   | 10.0909  | 7.33237  | 2.74731  | 4.58583  | -0.9662 | 0.0014688 | 0.0071336 | Down-regulated |
| NM_001114120 | DEPDC1        | 55635  | 1.83944  | 1.59249  | 0.836305 | 0.696684 | -0.9665 | 0.0003384 | 0.0019398 | Down-regulated |
| NM_182487    | OLFML2A       | 169611 | 3.78613  | 4.0204   | 1.86461  | 1.97568  | -0.9684 | 3.37E-10  | 4.72E-09  | Down-regulated |
| NM_001098414 | ZNF621        | 285268 | 3.15842  | 1.65467  | 0.587039 | 1.26648  | -0.9697 | 0.0034558 | 0.014905  | Down-regulated |
| NM_022346    | NCAPG         | 64151  | 12.6399  | 12.3109  | 6.44373  | 6.09441  | -0.9698 | 1.09E-22  | 3.71E-21  | Down-regulated |
| NM_152562    | CDC42         | 157313 | 4.87174  | 5.69291  | 2.62935  | 2.44802  | -0.9715 | 3.75E-07  | 3.69E-06  | Down-regulated |
| NM_020647    | JPH1          | 56704  | 3.48148  | 2.93213  | 1.44892  | 1.54929  | -0.9732 | 1.35E-05  | 0.0001033 | Down-regulated |
| NM_001198897 | ACY1          | 95     | 4.79664  | 2.66326  | 1.28665  | 1.1257   | -0.9745 | 0.0062422 | 0.0247756 | Down-regulated |
| NR_135247    | MRPS25        | 64432  | 29.7057  | 30.7005  | 15.7734  | 14.6328  | -0.9747 | 2.13E-39  | 1.39E-37  | Down-regulated |
| NM_001321241 | SLC25A39      | 51629  | 3.47733  | 2.38569  | 0.943083 | 1.03929  | -0.975  | 0.0057732 | 0.0231593 | Down-regulated |
| NR_125815    | OC10192945    | 1E+08  | 7.74398  | 7.29836  | 2.87768  | 4.15755  | -0.9751 | 1.45E-05  | 0.0001106 | Down-regulated |
| NM_001001563 | TIMM50        | 92609  | 58.0404  | 57.1083  | 28.7595  | 29.3955  | -0.9764 | 5.92E-109 | 1.41E-106 | Down-regulated |
| NM_020890    | KIAA1524      | 57650  | 7.84881  | 6.54432  | 3.24032  | 3.73074  | -0.9777 | 1.08E-08  | 1.27E-07  | Down-regulated |
| NM_206943    | LTBP1         | 4052   | 3.12688  | 2.14097  | 1.32744  | 1.02501  | -0.9796 | 0.0001775 | 0.0010803 | Down-regulated |
| NM_001184702 | GYG2          | 8908   | 7.4424   | 6.85209  | 3.54689  | 3.37879  | -0.9806 | 3.66E-09  | 4.56E-08  | Down-regulated |
| NM_001318521 | CENPI         | 2491   | 1.49795  | 2.53083  | 0.625953 | 0.807867 | -0.9817 | 0.0043335 | 0.0181018 | Down-regulated |
| NM_138736    | GNAO1         | 2775   | 3.14276  | 3.54591  | 1.54058  | 1.67999  | -0.9825 | 5.88E-08  | 6.38E-07  | Down-regulated |
| NM_007159    | SLMAP         | 7871   | 1.25061  | 1.60352  | 0.6377   | 0.567622 | -0.9831 | 0.0007962 | 0.0041785 | Down-regulated |
| NM_001135244 | TCOF1         | 6949   | 9.95421  | 10.6152  | 5.5746   | 4.51631  | -0.9844 | 1.38E-12  | 2.39E-11  | Down-regulated |
| NM_001145437 | ene-lanosterc | 4047   | 20.1983  | 18.6892  | 10.5388  | 8.66564  | -0.9847 | 1.74E-16  | 4.05E-15  | Down-regulated |
| NM_001033    | RRM1          | 6240   | 37.3595  | 37.4071  | 18.1668  | 19.2011  | -0.9854 | 2.86E-44  | 2.17E-42  | Down-regulated |
| NM_001135243 | TCOF1         | 6949   | 7.6109   | 7.87768  | 3.43342  | 4.12526  | -0.9875 | 3.92E-12  | 6.46E-11  | Down-regulated |
| NM_018454    | NUSAP1        | 51203  | 11.594   | 12.407   | 4.33067  | 6.75321  | -0.9878 | 1.17E-05  | 9.11E-05  | Down-regulated |
| NM_001165037 | GABRA5        | 2558   | 7.80693  | 7.29603  | 3.66832  | 3.56335  | -0.9891 | 2.22E-08  | 2.53E-07  | Down-regulated |
| NM_016310    | POLR3K        | 51728  | 104.353  | 91.1337  | 50.683   | 44.9547  | -0.9912 | 9.26E-15  | 1.93E-13  | Down-regulated |
| NM_001317929 | SLC27A3       | 11000  | 2.37398  | 5.2278   | 0.866703 | 1.54202  | -0.9916 | 0.0054097 | 0.0219641 | Down-regulated |
| NM_006623    | PHGDH         | 26227  | 111.442  | 103.626  | 52.1715  | 54.7317  | -0.9943 | 1.04E-50  | 9.54E-49  | Down-regulated |
| NM_001289068 | HELLS         | 3070   | 2.34731  | 1.42598  | 0.753088 | 0.534113 | -0.9954 | 0.0043515 | 0.0181616 | Down-regulated |
| NM_006089    | osophila)(SCM | 10389  | 1.91946  | 1.44658  | 0.541709 | 0.777699 | -0.9959 | 0.0018426 | 0.0086545 | Down-regulated |
| NM_018719    | CDC47L        | 55536  | 13.0023  | 12.0832  | 6.06929  | 6.14754  | -0.9961 | 5.48E-14  | 1.08E-12  | Down-regulated |
| NM_001303448 | SRRM1         | 10250  | 6.51898  | 6.17275  | 3.61961  | 1.89966  | -0.9966 | 0.0002352 | 0.0013933 | Down-regulated |
| NM_001281520 | MCM8          | 84515  | 3.03325  | 4.51756  | 1.48945  | 1.79129  | -0.9983 | 0.000221  | 0.0013175 | Down-regulated |
| NM_001103161 | SH2D5         | 400745 | 2.96773  | 2.27868  | 1.31728  | 0.799093 | -0.9991 | 0.0011696 | 0.0058611 | Down-regulated |
| NM_001078177 | blood group)  | 2030   | 4.08225  | 3.67768  | 1.10347  | 1.97095  | -1      | 0.0015264 | 0.0073761 | Down-regulated |
| NM_001320605 | ICAM3         | 3385   | 3.41551  | 3.72785  | 1.43359  | 1.29473  | -1.0012 | 0.0020988 | 0.0096981 | Down-regulated |
| NM_032043    | BRIP1         | 83990  | 1.76796  | 1.88493  | 0.9201   | 0.772162 | -1.0017 | 2.65E-06  | 2.30E-05  | Down-regulated |
| NM_001025092 | MBP           | 4155   | 40.7032  | 33.716   | 18.277   | 17.9567  | -1.0033 | 1.98E-16  | 4.61E-15  | Down-regulated |
| NM_005761    | PLXNC1        | 10154  | 12.5555  | 13.3787  | 6.29454  | 6.47875  | -1.0033 | 8.46E-35  | 4.71E-33  | Down-regulated |
| NM_001278463 | DNM1L         | 10059  | 4.01323  | 4.65549  | 2.07973  | 1.9935   | -1.0043 | 1.07E-07  | 1.13E-06  | Down-regulated |
| NM_173089    | CAPN3         | 825    | 13.9413  | 11.1961  | 4.63503  | 6.40362  | -1.0047 | 0.0001271 | 0.0008018 | Down-regulated |
| NM_001304463 | blood group)  | 2030   | 31.4036  | 32.7821  | 16.8985  | 14.3326  | -1.0053 | 6.13E-18  | 1.57E-16  | Down-regulated |
| NM_003594    | TTF2          | 8458   | 7.75681  | 8.58256  | 4.18305  | 3.709    | -1.0054 | 3.71E-13  | 6.75E-12  | Down-regulated |
| NM_000899    | KITLG         | 4254   | 2.54057  | 2.47073  | 1.19389  | 1.11683  | -1.0074 | 2.40E-06  | 2.09E-05  | Down-regulated |
| NM_001281932 | NCAPG2        | 54892  | 1.68773  | 1.05999  | 0.46764  | 0.497115 | -1.0081 | 0.0030981 | 0.0135271 | Down-regulated |
| NM_024571    | SNRNP25       | 79622  | 37.5812  | 37.2551  | 18.3887  | 17.7052  | -1.0086 | 1.04E-13  | 1.99E-12  | Down-regulated |
| NM_002467    | MYC           | 4609   | 178.665  | 174.214  | 87.8233  | 86.4006  | -1.009  | 1.33E-129 | 4.03E-127 | Down-regulated |
| NM_012343    | NNT           | 23530  | 13.2342  | 14.4392  | 6.95241  | 6.5286   | -1.01   | 5.88E-22  | 1.91E-20  | Down-regulated |
| NM_007331    | WHSC1         | 7468   | 0.994287 | 1.3001   | 0.398426 | 0.481705 | -1.0106 | 0.0018254 | 0.0085947 | Down-regulated |
| NM_001264573 | KIF18B        | 146909 | 10.0087  | 10.1412  | 5.02878  | 4.74784  | -1.011  | 7.11E-18  | 1.82E-16  | Down-regulated |
| NR_134468    | CARD19        | 84270  | 12.1238  | 11.8593  | 4.6828   | 5.54405  | -1.0112 | 0.0003138 | 0.0018119 | Down-regulated |
| NM_178169    | RASSF3        | 283349 | 67.1592  | 64.8987  | 33.4413  | 31.5396  | -1.0113 | 3.73E-68  | 5.05E-66  | Down-regulated |
| NR_027700    | NOP56         | 10528  | 40.1437  | 37.8219  | 17.6522  | 20.2686  | -1.012  | 3.89E-22  | 1.27E-20  | Down-regulated |
| NM_152834    | TMEM18        | 129787 | 25.6923  | 23.7048  | 11.2186  | 12.6431  | -1.0122 | 4.60E-16  | 1.04E-14  | Down-regulated |
| NM_017915    | PARPB         | 55010  | 4.19341  | 3.63267  | 1.64376  | 1.84305  | -1.0125 | 2.95E-05  | 0.0002116 | Down-regulated |
| NM_001129728 | PLEKHG4       | 25894  | 7.42116  | 11.2703  | 4.63752  | 3.91771  | -1.0139 | 2.33E-06  | 2.04E-05  | Down-regulated |
| NR_033651    | MSC-A51       | 1E+08  | 1.96324  | 2.15424  | 0.791792 | 0.949031 | -1.016  | 0.0002294 | 0.0013618 | Down-regulated |
| NM_016180    | SLC45A2       | 51151  | 63.3635  | 58.851   | 30.1304  | 29.4519  | -1.0165 | 2.83E-33  | 1.52E-31  | Down-regulated |
| NM_032139    | ANKRD27       | 84079  | 19.4283  | 19.1639  | 9.58601  | 9.22704  | -1.0178 | 3.87E-36  | 2.25E-34  | Down-regulated |
| NM_025108    | C16orf59      | 80178  | 4.47793  | 5.19169  | 2.01812  | 1.91535  | -1.0178 | 0.0006368 | 0.0034188 | Down-regulated |
| NM_001195308 | CGBBP1        | 8545   | 0.806766 | 1.45375  | 0.341434 | 0.3821   | -1.018  | 0.0040768 | 0.0171918 | Down-regulated |
| NM_002129    | HMG2          | 3148   | 49.2497  | 46.7859  | 22.7494  | 23.8426  | -1.0182 | 2.89E-25  | 1.14E-23  | Down-regulated |
| NM_019023    | PRMT7         | 54496  | 28.0214  | 25.4555  | 13.4814  | 12.3624  | -1.0191 | 3.43E-20  | 1.03E-18  | Down-regulated |
| NM_001272036 | LRRC14        | 9684   | 1.85513  | 1.50919  | 0.437905 | 0.827436 | -1.0212 | 0.0016445 | 0.0078554 | Down-regulated |
| NM_001256574 | ENC1          | 8507   | 2.05184  | 2.10315  | 1.03748  | 0.773384 | -1.0215 | 5.41E-05  | 0.0003684 | Down-regulated |
| NM_031945    | TSPAN10       | 83882  | 31.6126  | 29.9222  | 16.1953  | 13.0919  | -1.0218 | 2.20E-12  | 3.71E-11  | Down-regulated |
| NM_003918    | GYG2          | 8908   | 2.4895   | 2.33797  | 1.06025  | 0.972146 | -1.022  | 0.0002382 | 0.0014089 | Down-regulated |
| NM_001253388 | CHL1          | 10752  | 13.3053  | 13.4629  | 6.3812   | 6.63988  | -1.0229 | 4.83E-42  | 3.43E-40  | Down-regulated |
| NM_002106    | H2AFZ         | 3015   | 1316.63  | 1253.67  | 618.028  | 637.474  | -1.023  | 1.17E-131 | 3.71E-129 | Down-regulated |
| NM_001142966 | GREB1L        | 80000  | 1.1769   | 1.0943   | 0.369287 | 0.518536 | -1.0244 | 0.0009274 | 0.0047855 | Down-regulated |
| NM_000057    | BLM           | 641    | 4.32244  | 3.96148  | 1.87401  | 1.96192  | -1.0253 | 3.10E-08  | 3.48E-07  | Down-regulated |
| NM_020910    | KIAA1549      | 57670  | 0.804812 | 0.421949 | 0.225735 | 0.20875  | -1.0261 | 0.0023078 | 0.0105064 | Down-regulated |
| NM_006469    | IVNS1ABP      | 10625  | 101.721  | 96.6199  | 48.2876  | 48.337   | -1.0278 | 7.99E-111 | 1.98E-108 | Down-regulated |
| NM_006397    | RNASEH2A      | 10535  | 71.7837  | 67.64    | 34.3649  | 32.7259  | -1.0283 | 4.62E-25  | 1.80E-23  | Down-regulated |
| NM_012449    | STEAP1        | 26872  | 9.42331  | 9.64954  | 3.81738  | 4.49498  | -1.0289 | 4.40E-05  | 0.0003041 | Down-regulated |
| NM_001008396 | WDHD1         | 11169  | 0.971269 | 1.02825  | 0.442238 | 0.258502 | -1.0309 | 0.0021768 | 0.0099957 | Down-regulated |
| NM_006803    | AP3M2         | 10947  | 6.51725  | 7.03816  | 3.43634  | 2.8504   | -1.0319 | 7.36E-09  | 8.90E-08  | Down-regulated |
| NM_001078175 | blood group)  | 2030   | 11.4523  | 8.12572  | 4.40063  | 4.31693  | -1.0328 | 4.78E-06  | 4.01E-05  | Down-regulated |
| NM_033100    | CDHR1         | 92211  | 1.68347  | 2.0641   | 0.754505 | 0.890294 | -1.033  | 2.41E-05  | 0.0001759 | Down-regulated |
| NM_138609    | H2AFY         | 9555   | 10.147   | 12.5384  | 5.50562  | 4.78035  | -1.0348 | 6.84E-07  | 6.50E-06  | Down-regulated |
| NM_001322434 | HNRNP3        | 3189   | 22.3486  | 31.4975  | 10.5391  | 14.0146  | -1.0353 | 2.02E-07  | 2.06E-06  | Down-regulated |
| NM_018096    | NLE1          | 54475  | 12.1825  | 8.8908   | 5.09189  | 4.42971  | -1.0356 | 8.95E-07  | 8.37E-06  | Down-regulated |
| NM_001042424 | WHSC1         | 7468   | 9.18454  | 8.82949  | 3.14437  | 5.06612  | -1.0361 | 1.98E-07  | 2.03E-06  | Down-regulated |
| NM_001267064 | PLEKHB2       | 55041  | 1.81855  | 1.96044  | 0.222982 | 0.793592 | -1.0378 | 0.0042591 | 0.0178278 | Down-regulated |
| NM_007057    | ZWINT         | 11130  | 45.7622  | 48.3202  | 23.1318  | 21.9147  | -1.0382 | 2.67E-27  | 1.17E-25  | Down-regulated |

|              |               |        |          |          |           |          |         |           |           |                |
|--------------|---------------|--------|----------|----------|-----------|----------|---------|-----------|-----------|----------------|
| NM_015216    | PIIP5K2       | 23262  | 1.94784  | 1.23523  | 0.743615  | 0.519243 | -1.0401 | 0.0005614 | 0.0030519 | Down-regulated |
| NM_014444    | TUBGCP4       | 27229  | 4.03371  | 3.59604  | 1.97086   | 1.30754  | -1.0401 | 4.03E-05  | 0.0002809 | Down-regulated |
| NM_024037    | AUNIP         | 79000  | 2.80443  | 3.84413  | 1.0453    | 1.39808  | -1.0406 | 0.0013199 | 0.0065232 | Down-regulated |
| NM_001136538 | ACAD10        | 80724  | 2.63529  | 0.657721 | 0.249123  | 0.39062  | -1.0426 | 0.0041673 | 0.0174883 | Down-regulated |
| NM_001318730 | DNMT1         | 1786   | 7.37071  | 7.2609   | 3.10603   | 3.75575  | -1.0426 | 4.06E-13  | 7.38E-12  | Down-regulated |
| NM_018132    | CENPQ         | 55166  | 9.20937  | 8.8337   | 3.51615   | 4.40172  | -1.0501 | 5.15E-06  | 4.28E-05  | Down-regulated |
| NM_022337    | RAB38         | 23682  | 77.9168  | 80.9905  | 39.5707   | 36.0591  | -1.0502 | 6.19E-35  | 3.47E-33  | Down-regulated |
| NM_001288640 | FAM222B       | 55731  | 1.94672  | 1.74281  | 0.632866  | 0.81519  | -1.0562 | 0.0003839 | 0.0021718 | Down-regulated |
| NM_173694    | ATP11C        | 286410 | 1.46901  | 0.926321 | 0.500196  | 0.230248 | -1.0567 | 0.0028552 | 0.0126282 | Down-regulated |
| NM_002374    | MAP2          | 4133   | 0.497078 | 0.524247 | 0.199833  | 0.162104 | -1.057  | 0.0014954 | 0.0072446 | Down-regulated |
| NM_031965    | GSG2          | 83903  | 8.30436  | 9.50738  | 3.89972   | 4.2424   | -1.057  | 1.69E-09  | 2.18E-08  | Down-regulated |
| NM_001290230 | CDK2          | 1017   | 2.97762  | 3.3473   | 1.2388    | 1.18276  | -1.058  | 0.0006092 | 0.0032845 | Down-regulated |
| NM_002916    | RFC4          | 5984   | 40.9861  | 35.6159  | 18.4193   | 17.266   | -1.0584 | 2.34E-15  | 5.12E-14  | Down-regulated |
| NM_020062    | SLC2A4RG      | 56731  | 35.5394  | 36.8551  | 16.5002   | 17.6871  | -1.0585 | 3.26E-31  | 1.64E-29  | Down-regulated |
| NM_005483    | CHAF1A        | 10036  | 36.1523  | 34.0799  | 17.0051   | 16.2324  | -1.0611 | 2.88E-43  | 2.15E-41  | Down-regulated |
| NM_014176    | UBE2T         | 29089  | 57.9755  | 49.956   | 24.9358   | 24.8791  | -1.0611 | 4.54E-13  | 8.21E-12  | Down-regulated |
| NM_003258    | TK1           | 7083   | 106.405  | 100.011  | 47.5123   | 50.1661  | -1.0625 | 5.51E-49  | 4.80E-47  | Down-regulated |
| NM_017777    | MKS1          | 54903  | 7.07669  | 7.93577  | 3.6782    | 2.89408  | -1.0697 | 1.14E-06  | 1.05E-05  | Down-regulated |
| NM_001301867 | BOC           | 91653  | 4.59553  | 4.33842  | 1.61321   | 1.92468  | -1.0697 | 0.0002384 | 0.0014097 | Down-regulated |
| NM_001320970 | LIG1          | 3978   | 6.62839  | 3.72759  | 2.39446   | 1.5459   | -1.0703 | 0.0004829 | 0.0026706 | Down-regulated |
| NM_0022473   | ZNF106        | 64397  | 34.9851  | 36.1732  | 16.1564   | 17.4626  | -1.0704 | 3.15E-85  | 5.62E-83  | Down-regulated |
| NM_199413    | PRC1          | 9055   | 15.3804  | 15.6457  | 7.40097   | 7.00892  | -1.0725 | 1.47E-21  | 4.72E-20  | Down-regulated |
| NM_001237    | CCNA2         | 890    | 16.1113  | 15.6465  | 6.9851    | 7.72596  | -1.0732 | 1.88E-18  | 5.02E-17  | Down-regulated |
| NM_017702    | DEF8          | 54849  | 6.76461  | 8.58333  | 1.45681   | 2.94467  | -1.0744 | 0.0025609 | 0.0115168 | Down-regulated |
| NM_002725    | PRELP         | 5549   | 0.955124 | 0.727347 | 0.301634  | 0.255959 | -1.0745 | 0.0015934 | 0.0076477 | Down-regulated |
| NM_004482    | GALNT3        | 2591   | 3.10296  | 2.60121  | 1.12011   | 1.19656  | -1.0748 | 8.28E-05  | 0.0005414 | Down-regulated |
| NM_002358    | east)(MAD2L   | 4085   | 44.5283  | 40.0438  | 19.4472   | 19.6603  | -1.0773 | 3.55E-20  | 1.07E-18  | Down-regulated |
| NM_032756    | HPDL          | 84842  | 13.5158  | 12.2415  | 5.81445   | 5.70934  | -1.0818 | 1.30E-09  | 1.70E-08  | Down-regulated |
| NM_001105207 | LAMA4         | 3910   | 6.15323  | 6.42957  | 2.29225   | 3.31577  | -1.0827 | 3.57E-09  | 4.46E-08  | Down-regulated |
| NM_001012270 | BIRC5         | 332    | 4.72823  | 2.73454  | 1.54542   | 0.806649 | -1.0853 | 0.0016931 | 0.0080634 | Down-regulated |
| NM_020201    | NT5M          | 56953  | 6.6465   | 6.49831  | 2.92117   | 2.41739  | -1.088  | 5.71E-05  | 0.0003863 | Down-regulated |
| NM_145307    | RTKN2         | 219790 | 1.72395  | 1.69464  | 0.817373  | 0.568438 | -1.0899 | 3.49E-05  | 0.0002465 | Down-regulated |
| NM_006231    | POLE          | 5426   | 13.1629  | 13.8752  | 6.24707   | 6.27896  | -1.0924 | 1.71E-47  | 1.44E-45  | Down-regulated |
| NM_002689    | POLA2         | 23649  | 7.91788  | 8.39663  | 3.87982   | 3.4731   | -1.0924 | 8.82E-13  | 1.55E-11  | Down-regulated |
| NM_001330450 | MAP2K6        | 5608   | 0.454282 | 0.537205 | 0.17107   | 0.203927 | -1.0928 | 0.0003251 | 0.0018691 | Down-regulated |
| NM_001316    | CSE1L         | 1434   | 55.8991  | 57.3454  | 26.6033   | 26.0311  | -1.0936 | 2.51E-86  | 4.53E-84  | Down-regulated |
| NM_001025090 | MBP           | 4155   | 44.2991  | 40.3041  | 20.7842   | 17.9792  | -1.0939 | 1.61E-23  | 5.77E-22  | Down-regulated |
| NM_006874    | ELF2          | 1998   | 1.92549  | 1.5813   | 0.0157477 | 0.281405 | -1.0948 | 0.0017539 | 0.0083136 | Down-regulated |
| NM_001271846 | TBC1D16       | 125058 | 36.7982  | 34.2195  | 17.1953   | 14.803   | -1.0952 | 2.80E-13  | 5.15E-12  | Down-regulated |
| NM_015617    | PYGO1         | 26108  | 1.58767  | 1.20344  | 0.656777  | 0.418948 | -1.0953 | 0.0001785 | 0.0010859 | Down-regulated |
| NM_001321265 | MBOAT2        | 129642 | 1.50224  | 0.377871 | 0.203295  | 0.154899 | -1.0956 | 0.0026675 | 0.0119306 | Down-regulated |
| NM_019099    | FAM1212B      | 55924  | 6.55998  | 6.21254  | 3.32766   | 2.24478  | -1.0968 | 3.19E-08  | 3.56E-07  | Down-regulated |
| NM_144732    | HNRNPUL1      | 11100  | 11.0726  | 4.64768  | 3.44957   | 1.98435  | -1.0999 | 0.0007799 | 0.004113  | Down-regulated |
| NM_000465    | BARD1         | 580    | 1.16937  | 1.25627  | 0.486661  | 0.42318  | -1.1006 | 0.0002723 | 0.0015927 | Down-regulated |
| NM_144497    | AKAP12        | 9590   | 4.82903  | 5.28821  | 2.51047   | 2.01876  | -1.1026 | 6.51E-13  | 1.16E-11  | Down-regulated |
| NR_024251    | FAM86JP       | 1E+08  | 2.36217  | 2.35239  | 0.829577  | 0.537743 | -1.1049 | 0.0017268 | 0.0082053 | Down-regulated |
| NR_033953    | P2RX7         | 5027   | 4.69748  | 4.49606  | 1.83267   | 2.12423  | -1.1074 | 7.09E-08  | 7.62E-07  | Down-regulated |
| NM_001031740 | MANEAL        | 149175 | 5.15659  | 5.3468   | 1.91314   | 2.43625  | -1.1077 | 4.15E-06  | 3.50E-05  | Down-regulated |
| NM_001286436 | NME4          | 4833   | 9.51351  | 11.1767  | 4.64658   | 3.51939  | -1.1079 | 5.83E-05  | 0.0003933 | Down-regulated |
| NM_001297705 | ADGRL2        | 23266  | 0.981802 | 1.59029  | 0.42903   | 0.470682 | -1.1099 | 0.0005448 | 0.0029698 | Down-regulated |
| NM_015925    | LSR           | 51599  | 2.71683  | 2.35214  | 0.514747  | 0.970274 | -1.1124 | 0.0015841 | 0.0076124 | Down-regulated |
| NM_002895    | RBL1          | 5933   | 3.44463  | 3.7057   | 1.78337   | 1.20678  | -1.1166 | 8.86E-07  | 8.29E-06  | Down-regulated |
| NM_001321746 | FAM168B       | 130074 | 1.55595  | 1.04631  | 0.476455  | 0.413043 | -1.1194 | 0.0005478 | 0.0029846 | Down-regulated |
| NM_012210    | TRIM32        | 22954  | 3.73985  | 3.18555  | 1.1046    | 1.61763  | -1.124  | 3.04E-05  | 0.0002172 | Down-regulated |
| NM_001105208 | LAMA4         | 3910   | 9.38564  | 11.8639  | 1.40033   | 3.6359   | -1.1245 | 0.0019459 | 0.0090817 | Down-regulated |
| NM_000326    | RLBP1         | 6017   | 13.4443  | 14.5605  | 6.44538   | 5.6536   | -1.1253 | 4.69E-10  | 6.46E-09  | Down-regulated |
| NM_001318908 | TCF19         | 6941   | 2.96965  | 1.9363   | 0.567318  | 0.974087 | -1.1286 | 0.0009057 | 0.0046925 | Down-regulated |
| NM_001345876 | PIIP5K2       | 23262  | 1.09997  | 1.16785  | 0.342722  | 0.493191 | -1.1296 | 0.00014   | 0.0008757 | Down-regulated |
| NM_004809    | STOML1        | 9399   | 6.03214  | 3.29219  | 1.77639   | 0.985943 | -1.1321 | 0.0010982 | 0.0055439 | Down-regulated |
| NM_024053    | CENPM         | 79019  | 15.3365  | 13.9477  | 5.94943   | 5.72693  | -1.1349 | 5.80E-06  | 4.79E-05  | Down-regulated |
| NM_014321    | ORC6          | 23594  | 19.6364  | 18.2202  | 8.45623   | 7.99214  | -1.1359 | 3.63E-13  | 6.62E-12  | Down-regulated |
| NM_006574    | CSPG5         | 10675  | 3.58515  | 3.2978   | 1.18636   | 1.31104  | -1.1363 | 0.0001615 | 0.0009935 | Down-regulated |
| NM_001323352 | ST3GAL6       | 10402  | 6.92697  | 10.0126  | 2.8151    | 4.01957  | -1.137  | 2.95E-06  | 2.54E-05  | Down-regulated |
| NM_001098272 | HMGCS1        | 3157   | 24.932   | 25.4214  | 11.6418   | 10.9791  | -1.1382 | 1.02E-61  | 1.15E-59  | Down-regulated |
| NM_002482    | NASP          | 4678   | 16.5259  | 17.4554  | 7.46896   | 7.62913  | -1.1385 | 2.26E-26  | 9.59E-25  | Down-regulated |
| NM_001129765 | hid dehydroge | 50814  | 5.99826  | 3.25113  | 1.55303   | 1.08469  | -1.1389 | 0.0011468 | 0.0057557 | Down-regulated |
| NM_001323685 | NRSN2         | 80023  | 8.13356  | 5.87038  | 3.1338    | 2.18979  | -1.1409 | 4.19E-05  | 0.0002907 | Down-regulated |
| NM_020242    | KIF15         | 56992  | 3.61578  | 4.18176  | 1.56818   | 1.71736  | -1.1446 | 8.29E-09  | 9.90E-08  | Down-regulated |
| NM_032456    | PCDH7         | 5099   | 1.94175  | 1.9887   | 0.880777  | 0.546244 | -1.1508 | 0.0001145 | 0.0007292 | Down-regulated |
| NM_001258366 | DIAPH3        | 81624  | 2.68594  | 2.57762  | 0.426103  | 1.16826  | -1.1528 | 0.0007516 | 0.0039746 | Down-regulated |
| NM_015245    | ANKS1A        | 23294  | 27.833   | 29.6371  | 13.3883   | 12.0908  | -1.1547 | 8.70E-51  | 8.03E-49  | Down-regulated |
| NM_001144961 | NFKBIL1       | 4795   | 4.35379  | 2.94213  | 0.788994  | 0.172802 | -1.1564 | 0.0014078 | 0.0069006 | Down-regulated |
| NM_138555    | KIF23         | 9493   | 12.5127  | 11.7477  | 5.54011   | 4.98955  | -1.1602 | 4.66E-20  | 1.39E-18  | Down-regulated |
| NM_001167912 | VEPH1         | 79674  | 5.13718  | 5.96992  | 2.03286   | 2.56023  | -1.1627 | 8.06E-09  | 9.66E-08  | Down-regulated |
| NM_001948    | DUT           | 1854   | 20.118   | 18.5524  | 8.10018   | 8.49911  | -1.1657 | 4.11E-16  | 9.35E-15  | Down-regulated |
| NM_032336    | GINS4         | 84296  | 11.0491  | 10.9044  | 4.72809   | 4.79543  | -1.1659 | 2.78E-22  | 9.20E-21  | Down-regulated |
| NM_001184960 | SH3KBP1       | 30011  | 5.96363  | 5.53154  | 2.29898   | 2.52886  | -1.168  | 4.17E-11  | 6.35E-10  | Down-regulated |
| NM_001786    | CDK1          | 983    | 32.1637  | 28.882   | 12.2948   | 14.0404  | -1.1687 | 1.13E-19  | 3.26E-18  | Down-regulated |
| NM_198468    | MMS22L        | 253714 | 1.52332  | 1.60492  | 0.633468  | 0.633939 | -1.169  | 7.63E-08  | 8.16E-07  | Down-regulated |
| NM_001003940 | BMF           | 90427  | 4.1639   | 3.63175  | 1.08697   | 1.85516  | -1.1698 | 1.50E-05  | 0.0001138 | Down-regulated |
| NM_001287385 | FAM72C        | 554282 | 2.58764  | 2.96837  | 0.914927  | 0.959693 | -1.1708 | 0.0002109 | 0.0012649 | Down-regulated |
| NM_080668    | CDCA5         | 113130 | 20.8808  | 21.3432  | 9.2787    | 9.04799  | -1.1708 | 2.00E-27  | 8.80E-26  | Down-regulated |
| NR_026980    | FRG2DP        | 146481 | 17.4307  | 17.2545  | 7.21082   | 7.55731  | -1.1751 | 2.99E-15  | 6.47E-14  | Down-regulated |
| NM_001113378 | FANCI         | 55215  | 19.217   | 18.1246  | 8.58016   | 7.64641  | -1.1753 | 7.36E-34  | 4.05E-32  | Down-regulated |



|              |               |        |           |          |            |            |         |           |           |                |
|--------------|---------------|--------|-----------|----------|------------|------------|---------|-----------|-----------|----------------|
| NM_001018115 | FANCD2        | 2177   | 7.93471   | 7.15867  | 3.36235    | 3.08561    | -1.1766 | 1.28E-17  | 3.23E-16  | Down-regulated |
| NM_001254    | CDC6          | 990    | 25.4853   | 24.9001  | 11.3399    | 10.5403    | -1.177  | 1.24E-36  | 7.32E-35  | Down-regulated |
| NM_006917    | RXRG          | 6258   | 15.7012   | 15.2197  | 6.4564     | 6.7189     | -1.1778 | 8.06E-17  | 1.93E-15  | Down-regulated |
| NM_001282206 | SIGMAR1       | 10280  | 3.90269   | 3.06481  | 0.231649   | 0.934026   | -1.1786 | 0.0012366 | 0.0061549 | Down-regulated |
| NM_005891    | ACAT2         | 39     | 129.392   | 118.863  | 52.4655    | 55.7063    | -1.1789 | 8.97E-55  | 8.92E-53  | Down-regulated |
| NM_014392    | NSG1          | 27065  | 4.44902   | 4.5535   | 1.9178     | 1.50085    | -1.18   | 8.97E-06  | 7.13E-05  | Down-regulated |
| NM_001922    | DCT           | 1638   | 34.155    | 35.3858  | 15.7728    | 14.5576    | -1.1805 | 1.69E-62  | 1.97E-60  | Down-regulated |
| NM_001313982 | CDK11A        | 728642 | 1.86009   | 1.22796  | 0.215898   | 0.446259   | -1.1824 | 0.0011429 | 0.0057406 | Down-regulated |
| NM_182649    | PCNA          | 5111   | 51.6824   | 48.486   | 19.2435    | 23.3533    | -1.1838 | 6.60E-19  | 1.80E-17  | Down-regulated |
| NM_007229    | PACSIN2       | 11252  | 13.168    | 14.0587  | 4.84245    | 6.49082    | -1.1856 | 2.14E-12  | 3.62E-11  | Down-regulated |
| NM_001127197 | ELF4          | 2000   | 0.915409  | 3.42287  | 0.494378   | 0.286265   | -1.1856 | 0.0011684 | 0.0058566 | Down-regulated |
| NM_004111    | FEN1          | 2237   | 25.4605   | 27.0693  | 10.9848    | 11.5465    | -1.186  | 9.55E-28  | 4.26E-26  | Down-regulated |
| NM_001329559 | TIMM50        | 92609  | 0.853165  | 1.21113  | 0.285957   | 0.327523   | -1.186  | 0.0004422 | 0.0024671 | Down-regulated |
| NM_001010853 | PM20D2        | 135293 | 4.46422   | 4.34484  | 1.70352    | 1.93178    | -1.1862 | 8.31E-11  | 1.24E-09  | Down-regulated |
| NM_001317184 | CDH1          | 999    | 0.1627741 | 0.120883 | 0.0512214  | 0.0733264  | -1.1874 | 3.23E-07  | 2.84E-36  | Down-regulated |
| NM_173214    | NFAT5         | 10725  | 2.20246   | 1.93453  | 0.823243   | 0.90732    | -1.1879 | 4.27E-13  | 7.74E-12  | Down-regulated |
| NM_183236    | SHCBP1        | 79801  | 18.0267   | 18.8542  | 8.3472     | 7.41016    | -1.1911 | 1.16E-25  | 4.68E-24  | Down-regulated |
| NM_001167607 | GM2A          | 2760   | 1.36854   | 1.2837   | 0.435145   | 0.259429   | -1.1921 | 0.0007675 | 0.0040531 | Down-regulated |
| NM_002388    | MCM3          | 4172   | 32.0231   | 31.4467  | 14.3037    | 13.0352    | -1.1933 | 7.47E-45  | 5.76E-43  | Down-regulated |
| NM_013261    | PPARGC1A      | 10891  | 1.68023   | 1.89437  | 0.748058   | 0.606843   | -1.1955 | 2.66E-06  | 2.31E-05  | Down-regulated |
| NM_001771    | CD22          | 933    | 12.176    | 12.3779  | 5.87391    | 4.14817    | -1.1974 | 1.24E-10  | 1.82E-09  | Down-regulated |
| NM_005915    | MCM6          | 4175   | 20.209    | 19.9734  | 8.81292    | 8.42031    | -1.1977 | 1.22E-40  | 8.26E-39  | Down-regulated |
| NM_021958    | HLX           | 3142   | 8.47463   | 8.613    | 3.55612    | 3.39699    | -1.1988 | 2.80E-10  | 3.96E-09  | Down-regulated |
| NM_183236    | RAB27A        | 5873   | 6.40087   | 6.46297  | 3.04026    | 1.9243     | -1.1994 | 7.04E-07  | 6.67E-06  | Down-regulated |
| NM_145117    | NAV2          | 89797  | 9.43765   | 11.4004  | 4.95198    | 3.73285    | -1.2    | 3.56E-15  | 7.68E-14  | Down-regulated |
| NM_001018136 | NME1-NME2     | 654364 | 7.82664   | 7.1076   | 0          | 0.675667   | -1.2016 | 0.0005383 | 0.0029363 | Down-regulated |
| NR_040046    | LINC01531     | 1E+08  | 14.9664   | 13.3053  | 6.14504    | 5.72046    | -1.2032 | 4.37E-20  | 1.31E-18  | Down-regulated |
| NM_001290043 | TAP2          | 6891   | 5.75773   | 4.03375  | 2.26984    | 1.03088    | -1.211  | 7.22E-05  | 0.0004786 | Down-regulated |
| NM_001017420 | ESCO2         | 157570 | 3.12832   | 3.34927  | 1.34927    | 0.990358   | -1.2128 | 9.28E-06  | 7.36E-05  | Down-regulated |
| NM_002915    | RFC3          | 5983   | 13.5689   | 12.6681  | 5.26306    | 5.58409    | -1.2133 | 8.95E-16  | 2.01E-14  | Down-regulated |
| NM_152308    | RMI2          | 116028 | 21.9256   | 23.9365  | 9.7466     | 9.09225    | -1.2135 | 1.14E-14  | 2.36E-13  | Down-regulated |
| NM_001798    | CDK2          | 1017   | 113.507   | 115.285  | 47.9089    | 49.8628    | -1.2141 | 9.97E-118 | 2.57E-115 | Down-regulated |
| NM_000234    | LIG1          | 3978   | 10.3358   | 13.3042  | 3.75052    | 5.51211    | -1.2145 | 2.29E-08  | 2.61E-07  | Down-regulated |
| NM_145061    | SKA3          | 221150 | 5.9999    | 5.14859  | 2.09777    | 2.2512     | -1.2169 | 2.30E-08  | 2.62E-07  | Down-regulated |
| NM_005983    | SKP2          | 6502   | 5.99389   | 6.33755  | 2.62823    | 2.61508    | -1.2177 | 1.41E-11  | 2.22E-10  | Down-regulated |
| NM_015068    | PEG10         | 23089  | 9.68773   | 10.3528  | 4.71407    | 3.52088    | -1.2188 | 1.79E-15  | 3.96E-14  | Down-regulated |
| NM_000946    | subunit 1 (PI | 5557   | 11.9589   | 11.1754  | 4.55807    | 4.41609    | -1.2217 | 1.56E-08  | 1.81E-07  | Down-regulated |
| NM_003633    | ENC1          | 8507   | 8.38355   | 10.0052  | 3.69104    | 3.89807    | -1.2235 | 1.39E-18  | 3.71E-17  | Down-regulated |
| NM_020447    | FAM219B       | 57184  | 3.13702   | 2.90675  | 0.331914   | 1.08892    | -1.2284 | 0.0006137 | 0.0033056 | Down-regulated |
| NM_001311345 | HPS1          | 3257   | 4.70339   | 3.79355  | 1.82943    | 0.768905   | -1.2295 | 0.0001634 | 0.0010041 | Down-regulated |
| NM_0058179   | PSAT1         | 29968  | 54.7701   | 56.815   | 24.5146    | 22.2759    | -1.2323 | 5.43E-51  | 5.09E-49  | Down-regulated |
| NM_199420    | POLQ          | 10721  | 1.97948   | 2.24572  | 0.745181   | 0.901606   | -1.2325 | 3.20E-09  | 4.01E-08  | Down-regulated |
| NM_001318710 | KIFC3         | 3801   | 6.44698   | 7.12936  | 1.66475    | 3.12477    | -1.2366 | 7.56E-06  | 6.10E-05  | Down-regulated |
| NM_001080491 | USP6NL        | 9712   | 3.02274   | 3.25125  | 1.34438    | 0.964294   | -1.24   | 7.82E-07  | 7.38E-06  | Down-regulated |
| NM_021067    | GINS1         | 9837   | 5.59295   | 6.87381  | 2.45059    | 2.38984    | -1.241  | 1.44E-09  | 1.88E-08  | Down-regulated |
| NM_001281710 | NCAPH         | 23397  | 1.96745   | 2.96997  | 0.914457   | 0.839196   | -1.2437 | 3.76E-06  | 3.20E-05  | Down-regulated |
| NM_001130528 | SPAG9         | 9043   | 4.28473   | 4.46057  | 2.03908    | 1.34799    | -1.2441 | 1.56E-09  | 2.02E-08  | Down-regulated |
| NM_001145966 | MKI67         | 4288   | 6.91789   | 6.19469  | 2.10888    | 3.08928    | -1.246  | 1.52E-12  | 2.61E-11  | Down-regulated |
| NM_001146103 | nerase family | 83666  | 2.93579   | 2.55739  | 0.737718   | 1.05946    | -1.2527 | 2.94E-05  | 0.0002108 | Down-regulated |
| NR_028370    | PCNA-AS1      | 1E+08  | 232.991   | 209.98   | 87.1302    | 86.0229    | -1.2569 | 1.00E-12  | 1.75E-11  | Down-regulated |
| NM_020675    | SPC25         | 57405  | 16.2178   | 16.7236  | 6.96147    | 5.69123    | -1.2577 | 6.20E-10  | 8.38E-09  | Down-regulated |
| NM_002997    | SDC1          | 6382   | 23.5437   | 20.663   | 9.93899    | 7.70334    | -1.2614 | 4.60E-17  | 1.11E-15  | Down-regulated |
| NM_145018    | DDIAS         | 220042 | 3.50078   | 3.68562  | 1.35268    | 1.31263    | -1.2621 | 5.88E-08  | 6.38E-07  | Down-regulated |
| NM_032712    | C19orf48      | 84798  | 50.6577   | 46.7765  | 20.4052    | 19.1726    | -1.2629 | 7.07E-31  | 3.49E-29  | Down-regulated |
| NM_017512    | ENOSF1        | 55556  | 6.76583   | 8.14252  | 2.85552    | 3.01638    | -1.2761 | 1.31E-16  | 3.08E-15  | Down-regulated |
| NM_018248    | NEIL3         | 55247  | 2.81066   | 2.86703  | 0.816465   | 0.94202    | -1.2776 | 4.59E-05  | 0.0003162 | Down-regulated |
| NM_032525    | TUBB6         | 84617  | 0.873665  | 5.21476  | 0          | 0          | -1.2783 | 0.0001593 | 0.000982  | Down-regulated |
| NR_026765    | LINC00589     | 619351 | 3.62142   | 4.25352  | 1.0886     | 0.896315   | -1.2825 | 0.0002217 | 0.0013215 | Down-regulated |
| NM_001304476 | STXBP6        | 29091  | 8.03212   | 7.42069  | 2.80175    | 3.24418    | -1.283  | 1.17E-16  | 2.75E-15  | Down-regulated |
| NM_024094    | DSSC1         | 79075  | 5.42295   | 5.51731  | 1.71353    | 2.14267    | -1.2906 | 3.39E-07  | 3.35E-06  | Down-regulated |
| NM_004153    | ORC1          | 4998   | 5.18296   | 5.08931  | 1.91635    | 1.90366    | -1.2927 | 4.04E-10  | 5.61E-09  | Down-regulated |
| NM_003579    | revisiae)(RAI | 8438   | 4.71886   | 5.14457  | 2.02328    | 1.48941    | -1.299  | 7.02E-08  | 7.55E-07  | Down-regulated |
| NM_001163812 | TWNK          | 56652  | 3.4335    | 4.49211  | 1.41515    | 1.36708    | -1.3037 | 1.44E-07  | 1.50E-06  | Down-regulated |
| NM_013432    | TONSL         | 4796   | 18.6321   | 18.6125  | 7.8258     | 6.95836    | -1.3045 | 8.79E-42  | 6.22E-40  | Down-regulated |
| NM_001323364 | ST3GAL6       | 10402  | 0.49842   | 2.7329   | 0.00275766 | 0.00146385 | -1.3055 | 0.0001231 | 0.000778  | Down-regulated |
| NM_006739    | MCM5          | 4174   | 32.9334   | 32.2314  | 12.6379    | 13.1835    | -1.3097 | 1.15E-48  | 9.98E-47  | Down-regulated |
| NM_001306082 | STK32B        | 55351  | 2.54221   | 2.8647   | 0.468809   | 0.989476   | -1.3226 | 7.38E-05  | 0.000488  | Down-regulated |
| NM_145026    | SPATS1        | 221409 | 11.5574   | 11.3371  | 4.35098    | 2.36133    | -1.3228 | 2.80E-05  | 0.000202  | Down-regulated |
| NM_173088    | CAPN3         | 825    | 15.6741   | 11.3722  | 4.12785    | 5.20009    | -1.3298 | 5.16E-08  | 5.64E-07  | Down-regulated |
| NM_001318864 | IL17RD        | 54756  | 0.194589  | 1.03261  | 0.00055264 | 8.83E-05   | -1.332  | 9.51E-05  | 0.0006152 | Down-regulated |
| NM_001271816 | DCLRE1A       | 9937   | 2.54365   | 2.70577  | 0.417416   | 0.966586   | -1.3425 | 5.85E-05  | 0.0003943 | Down-regulated |
| NM_006444    | SMC2          | 10592  | 2.70799   | 3.49431  | 1.25153    | 0.668097   | -1.3426 | 4.79E-06  | 4.01E-05  | Down-regulated |
| NM_001286409 | isophila)(SCN | 256380 | 10.8149   | 10.3828  | 3.70618    | 4.33034    | -1.3433 | 1.33E-22  | 4.46E-21  | Down-regulated |
| NM_024629    | CENPU         | 79682  | 16.0515   | 16.0747  | 5.44604    | 6.59907    | -1.3489 | 7.78E-20  | 2.27E-18  | Down-regulated |
| NM_002875    | RAD51         | 5888   | 6.71491   | 6.0982   | 2.01138    | 2.34793    | -1.3644 | 5.99E-09  | 7.31E-08  | Down-regulated |
| NM_001034915 | ESRP1         | 54845  | 2.0589    | 1.5354   | 0.552752   | 0.323359   | -1.3679 | 5.94E-05  | 0.0003995 | Down-regulated |
| NM_173090    | CAPN3         | 825    | 34.6509   | 32.542   | 13.7449    | 10.7787    | -1.3688 | 2.61E-16  | 6.03E-15  | Down-regulated |
| NM_018154    | ASF1B         | 55723  | 25.242    | 25.2407  | 8.81197    | 9.91054    | -1.3729 | 6.57E-24  | 2.38E-22  | Down-regulated |
| NM_003504    | CDC45         | 8318   | 15.0368   | 13.9462  | 3.89522    | 5.99693    | -1.3735 | 1.72E-09  | 2.21E-08  | Down-regulated |
| NM_014109    | ATAD2         | 29028  | 8.54502   | 8.65116  | 3.40202    | 3.01129    | -1.3754 | 9.75E-29  | 4.50E-27  | Down-regulated |
| NM_001322303 | CNIH3         | 149111 | 21.6256   | 6.41795  | 2.77328    | 3.45035    | -1.3821 | 7.61E-05  | 0.0005014 | Down-regulated |
| NM_004526    | MCM2          | 4171   | 27.5097   | 28.4807  | 10.3768    | 10.3894    | -1.4074 | 9.38E-66  | 1.18E-63  | Down-regulated |
| NM_139057    | ADAMTS17      | 170691 | 1.87911   | 1.76734  | 0.54022    | 0.630622   | -1.4078 | 1.77E-08  | 2.04E-07  | Down-regulated |
| NM_024900    | JADE1         | 79960  | 1.93177   | 1.44183  | 0.404869   | 0.48092    | -1.4095 | 1.15E-05  | 8.98E-05  | Down-regulated |

|              |            |        |          |          |            |            |         |           |           |                |
|--------------|------------|--------|----------|----------|------------|------------|---------|-----------|-----------|----------------|
| NM_022111    | CLSPN      | 63967  | 3.2558   | 3.25145  | 0.426497   | 1.2386     | -1.4175 | 1.36E-05  | 0.0001041 | Down-regulated |
| NM_005916    | MCM7       | 4176   | 123.517  | 125.419  | 48.0047    | 44.2845    | -1.4176 | 3.51E-144 | 1.32E-141 | Down-regulated |
| NM_001330490 | CLSPN      | 63967  | 2.92454  | 3.63693  | 1.1459     | 0.956126   | -1.4316 | 3.08E-09  | 3.87E-08  | Down-regulated |
| NM_138463    | TLCD1      | 116238 | 12.9507  | 14.2742  | 3.82224    | 4.42524    | -1.4504 | 4.32E-08  | 4.77E-07  | Down-regulated |
| NM_182746    | MCM4       | 4173   | 29.0981  | 29.2908  | 10.6786    | 10.3362    | -1.4562 | 2.18E-102 | 4.78E-100 | Down-regulated |
| NM_001243089 | FOXM1      | 2305   | 5.29791  | 6.22654  | 0.95094    | 2.11353    | -1.4567 | 2.60E-06  | 2.26E-05  | Down-regulated |
| NM_005328    | HAS2       | 3037   | 7.15388  | 7.28384  | 2.58092    | 2.28141    | -1.4628 | 4.73E-16  | 1.07E-14  | Down-regulated |
| NM_001256834 | AURKB      | 9212   | 31.1498  | 30.062   | 10.6902    | 10.3743    | -1.4665 | 1.77E-22  | 5.90E-21  | Down-regulated |
| NM_016831    | PER3       | 8863   | 1.12207  | 1.28296  | 0.292136   | 0.343893   | -1.4726 | 1.27E-06  | 1.16E-05  | Down-regulated |
| NM_005441    | CHAF1B     | 8208   | 10.1584  | 9.53192  | 3.58323    | 2.81624    | -1.4768 | 7.39E-13  | 1.31E-11  | Down-regulated |
| NM_004203    | PKMYT1     | 9088   | 31.4363  | 28.1191  | 11.0046    | 9.58068    | -1.4778 | 1.87E-30  | 9.07E-29  | Down-regulated |
| NM_004817    | TJP2       | 9414   | 4.88623  | 4.66144  | 1.53782    | 1.88311    | -1.4808 | 6.22E-06  | 5.10E-05  | Down-regulated |
| NM_182513    | SPC24      | 147841 | 5.49869  | 5.18887  | 1.29509    | 1.77557    | -1.4951 | 3.11E-08  | 3.48E-07  | Down-regulated |
| NM_001308    | CPN1       | 1369   | 7.43961  | 7.34503  | 2.15567    | 2.24815    | -1.5011 | 1.76E-09  | 2.26E-08  | Down-regulated |
| NM_014736    | KIAA0101   | 9768   | 53.0069  | 46.1831  | 16.8533    | 16.8968    | -1.5051 | 1.46E-35  | 8.33E-34  | Down-regulated |
| NM_014364    | GAPDHS     | 26330  | 7.97344  | 6.31516  | 2.05497    | 1.73989    | -1.516  | 2.69E-07  | 2.69E-06  | Down-regulated |
| NM_018518    | MCM10      | 55388  | 2.08906  | 2.64093  | 0.733149   | 0.443589   | -1.5246 | 8.95E-07  | 8.37E-06  | Down-regulated |
| NM_001190821 | SMAD7      | 4092   | 3.57699  | 0.74981  | 0.00057978 | 0.00024058 | -1.5326 | 1.16E-05  | 9.02E-05  | Down-regulated |
| NM_194317    | LYPD6      | 130574 | 2.0209   | 2.74347  | 0.514438   | 0.675644   | -1.5355 | 4.45E-07  | 4.33E-06  | Down-regulated |
| NM_001166357 | SHMT2      | 6472   | 3.43511  | 2.22211  | 0.275821   | 0.576388   | -1.5488 | 1.67E-05  | 0.0001257 | Down-regulated |
| NM_145810    | CDCA7      | 83879  | 8.67134  | 7.95834  | 2.52094    | 2.64467    | -1.5525 | 1.06E-15  | 2.37E-14  | Down-regulated |
| NM_018063    | HELLS      | 3070   | 1.85705  | 2.51025  | 0.522373   | 0.275423   | -1.5546 | 8.98E-06  | 7.13E-05  | Down-regulated |
| NM_001346507 | M_00134650 | NA     | 4.31754  | 2.17138  | 0.60153    | 0.95342    | -1.559  | 5.77E-07  | 5.54E-06  | Down-regulated |
| NM_016095    | GINS2      | 51659  | 23.2681  | 18.8359  | 7.1607     | 4.8117     | -1.5639 | 4.76E-10  | 6.54E-09  | Down-regulated |
| NM_030928    | CDT1       | 81620  | 13.4272  | 12.5701  | 4.09743    | 4.17184    | -1.5746 | 3.35E-26  | 1.40E-24  | Down-regulated |
| NM_024908    | WDR76      | 79968  | 2.60082  | 2.22032  | 0.585412   | 0.658999   | -1.5786 | 2.52E-08  | 2.86E-07  | Down-regulated |
| NM_001071    | TYMS       | 7298   | 39.3842  | 38.8335  | 12.4852    | 12.8615    | -1.5793 | 5.42E-45  | 4.21E-43  | Down-regulated |
| NM_030629    | CMIP       | 80790  | 0.561498 | 2.48231  | 0.0255549  | 0.0338366  | -1.5859 | 8.52E-06  | 6.80E-05  | Down-regulated |
| NM_014573    | TMEM97     | 27346  | 28.0879  | 28.0201  | 9.74024    | 8.18324    | -1.5959 | 8.25E-41  | 5.65E-39  | Down-regulated |
| NM_130398    | EXO1       | 9156   | 3.8096   | 4.39967  | 0.697249   | 1.28408    | -1.603  | 9.83E-08  | 1.04E-06  | Down-regulated |
| NM_182751    | MCM10      | 55388  | 1.75754  | 1.61458  | 0.293239   | 0.442443   | -1.6188 | 3.82E-07  | 3.75E-06  | Down-regulated |
| NM_001080114 | LDB3       | 11155  | 3.70159  | 3.20795  | 0.98938    | 0.995472   | -1.6201 | 9.32E-14  | 1.79E-12  | Down-regulated |
| NM_001319224 | EXO1       | 9156   | 3.63976  | 4.01456  | 0.859854   | 1.15175    | -1.6232 | 8.23E-10  | 1.10E-08  | Down-regulated |
| NM_001328675 | SV2A       | 9900   | 1.6528   | 1.56921  | 0.339429   | 0.125195   | -1.6238 | 5.67E-06  | 4.70E-05  | Down-regulated |
| NM_001100119 | XRCC3      | 7517   | 7.50838  | 4.28949  | 1.08557    | 1.54903    | -1.6322 | 1.63E-07  | 1.69E-06  | Down-regulated |
| NM_153695    | ZNF367     | 195828 | 3.34065  | 3.28814  | 0.893125   | 0.829201   | -1.6631 | 3.26E-11  | 5.01E-10  | Down-regulated |
| NM_001330360 | POLA1      | 5422   | 5.29619  | 3.81727  | 1.28775    | 1.20964    | -1.6668 | 6.07E-14  | 1.19E-12  | Down-regulated |
| NM_001128209 | SGCD       | 6444   | 0.995617 | 0.250936 | 6.18E-05   | 7.51E-05   | -1.6688 | 2.42E-06  | 2.12E-05  | Down-regulated |
| NM_007078    | LDB3       | 11155  | 2.70814  | 2.80861  | 0.76471    | 0.72621    | -1.6729 | 2.35E-13  | 4.37E-12  | Down-regulated |
| NM_001015887 | IGSF11     | 152404 | 6.41693  | 6.46389  | 1.88537    | 1.80131    | -1.674  | 2.80E-19  | 7.94E-18  | Down-regulated |
| NM_001330295 | TIMELESS   | 8914   | 4.56375  | 4.92773  | 1.3448     | 1.38474    | -1.6769 | 3.23E-21  | 1.02E-19  | Down-regulated |
| NM_033625    | RPL34      | 6164   | 7.68827  | 7.86825  | 0.473598   | 1.29339    | -1.6814 | 3.37E-06  | 2.88E-05  | Down-regulated |
| NM_139278    | LGB3       | 203190 | 7.41736  | 7.13906  | 1.98984    | 2.14748    | -1.6851 | 2.51E-20  | 7.58E-19  | Down-regulated |
| NM_016448    | DTL        | 51514  | 7.59247  | 6.63925  | 1.74254    | 2.21484    | -1.7146 | 1.21E-20  | 3.73E-19  | Down-regulated |
| NM_005225    | E2F1       | 1869   | 16.1249  | 17.5269  | 4.79439    | 4.82398    | -1.7358 | 2.33E-37  | 1.42E-35  | Down-regulated |
| NM_004091    | E2F2       | 1870   | 1.76237  | 1.93403  | 0.445691   | 0.384828   | -1.7433 | 9.66E-10  | 1.28E-08  | Down-regulated |
| NM_001789    | CDC25A     | 993    | 12.5883  | 11.33    | 3.07757    | 3.62577    | -1.7479 | 3.34E-31  | 1.68E-29  | Down-regulated |
| NM_198947    | FAM111B    | 374393 | 3.31426  | 3.78684  | 0.826588   | 0.887682   | -1.7483 | 1.07E-11  | 1.70E-10  | Down-regulated |
| NM_001079855 | YG2        | 8908   | 18.2101  | 18.1097  | 4.81517    | 5.10208    | -1.819  | 2.79E-58  | 2.96E-56  | Down-regulated |
| NM_002466    | MYBL2      | 4605   | 48.823   | 48.1421  | 13.1392    | 13.4633    | -1.8411 | 2.62E-134 | 9.09E-132 | Down-regulated |
| NM_001256575 | ENC1       | 8507   | 1.46674  | 1.09119  | 0.216889   | 0.202461   | -1.8436 | 1.93E-08  | 2.21E-07  | Down-regulated |
| NM_014791    | MELK       | 9833   | 5.86048  | 6.6733   | 1.39085    | 1.47756    | -1.8536 | 1.41E-14  | 2.90E-13  | Down-regulated |
| NM_207292    | MBNL1      | 4154   | 0.488575 | 1.5778   | 0.00020123 | 0          | -1.8575 | 2.24E-07  | 2.27E-06  | Down-regulated |
| NM_057749    | CCNE2      | 9134   | 4.28367  | 3.30091  | 0.68435    | 0.773932   | -1.8687 | 4.06E-10  | 5.63E-09  | Down-regulated |
| NM_022062    | PKNOX2     | 63876  | 3.40068  | 3.82419  | 0.635144   | 0.868152   | -1.8785 | 2.76E-12  | 4.61E-11  | Down-regulated |
| NM_001164178 | ENTPD1     | 953    | 1.42183  | 1.43889  | 0.332262   | 0.342086   | -1.8962 | 7.06E-20  | 2.07E-18  | Down-regulated |
| NM_018027    | FRMD4A     | 55691  | 1.75979  | 0.456874 | 0.00086254 | 0.00043584 | -1.9027 | 1.18E-07  | 1.24E-06  | Down-regulated |
| NM_001048201 | UHRF1      | 29128  | 9.58065  | 8.217    | 2.25257    | 0.904364   | -1.9256 | 2.34E-10  | 3.34E-09  | Down-regulated |
| NR_130968    | IQCK       | 124152 | 3.29289  | 3.74468  | 0.782124   | 0.545788   | -1.9343 | 1.35E-11  | 2.13E-10  | Down-regulated |
| NM_080911    | UNG        | 7374   | 11.6338  | 16.0041  | 2.60621    | 3.19322    | -1.9786 | 3.04E-17  | 7.46E-16  | Down-regulated |
| NM_021644    | HNRNPH3    | 3189   | 15.7054  | 18.3076  | 3.0446     | 4.42745    | -1.987  | 1.19E-21  | 3.82E-20  | Down-regulated |
| NM_001202429 | ASB2       | 51676  | 18.6106  | 18.2126  | 4.17704    | 4.33098    | -2.0398 | 2.64E-57  | 2.74E-55  | Down-regulated |
| NM_001034    | RRM2       | 6241   | 25.4822  | 24.0771  | 4.12471    | 6.17191    | -2.1197 | 5.00E-33  | 2.67E-31  | Down-regulated |
| NR_104038    | INO80      | 54617  | 1.47283  | 0.556163 | 8.11E-05   | 0.00010005 | -2.1277 | 4.60E-09  | 5.69E-08  | Down-regulated |
| NR_033194    | ZFAND1     | 79752  | 4.87163  | 5.25173  | 0.484863   | 0.768937   | -2.268  | 3.63E-13  | 6.62E-12  | Down-regulated |
| NM_175610    | TJP1       | 7082   | 2.26555  | 2.60737  | 0.39958    | 0.59847    | -2.2876 | 0.006636  | 0.026126  | Down-regulated |
| NM_001127641 | LAMB3      | 3914   | 2.43203  | 1.28271  | 0.00799429 | 0.075849   | -2.3423 | 1.32E-10  | 1.92E-09  | Down-regulated |
| NM_198269    | HIPK1      | 204851 | 1.56789  | 0.600302 | 0.00163682 | 0.00923799 | -2.3682 | 8.71E-11  | 1.29E-09  | Down-regulated |
| NM_007297    | BRCA1      | 672    | 0.597477 | 0.855146 | 4.93E-05   | 2.94E-05   | -2.498  | 7.92E-12  | 1.28E-10  | Down-regulated |
| NM_001142502 | PPP1R13L   | 10848  | 1.71917  | 1.68187  | 0          | 0          | -2.6178 | 7.21E-13  | 1.28E-11  | Down-regulated |
| NM_012301    | MAGI2      | 9863   | 0.919358 | 1.28548  | 0.00046551 | 0.00050663 | -3.2068 | 5.00E-19  | 1.38E-17  | Down-regulated |
| NM_001318731 | DNMT1      | 1786   | 1.66973  | 2.06366  | 0.0286085  | 0.00217478 | -3.5156 | 4.95E-24  | 1.82E-22  | Down-regulated |
| NM_001304385 | LSMEM2     | 132228 | 7.70324  | 6.28423  | 0.00698125 | 0.00117211 | -3.6052 | 1.67E-24  | 6.36E-23  | Down-regulated |
| NM_198158    | MITF       | 4286   | 21.643   | 20.1452  | 1.28263    | 0.965214   | -4.0378 | 1.74E-169 | 8.54E-167 | Down-regulated |
| NM_001300850 | RC3H1      | 149041 | 1.48628  | 1.12052  | 0.00905856 | 0.0003777  | -4.255  | 3.57E-37  | 2.17E-35  | Down-regulated |
| NM_001197104 | KMT2A      | 4297   | 1.3016   | 0.787526 | 0.00080548 | 0.00162733 | -4.3909 | 7.03E-38  | 4.33E-36  | Down-regulated |
| NM_032373    | PCGF5      | 84333  | 2.44783  | 2.09267  | 0.00677792 | 0.00243687 | -4.6409 | 5.54E-46  | 4.43E-44  | Down-regulated |
